# Supplementary material for: Construction of thioglycoside bonds via an asymmetric organocatalyzed sulfa-Michael/aldol reaction: access to 4′-thionucleosides
Source: Royal Society of Chemistry journal article supplement (doi:10.1039/d4cc00984c), 2024-01-01
Supplement: d4cc00984c1.pdf [file d4cc00984c1.pdf]

# Construction of Thioglycoside Bond via asymmetric organocatalyzed sulfa-Michael/Aldol reaction: Access to 4'-thionucleosides

**Tao Wei, Ming-Sheng Xie\* and Hai-Ming Guo\***

School of Environment, State Key Laboratory of Antiviral Drugs, Pingyuan Laboratory, Key Laboratory of Green Chemical Media and Reactions, Ministry of Education, School of Chemistry and Chemical Engineering, Henan Normal University, Xinxiang, Henan 453007, China.

E-mail: xiemingsheng@htu.edu.cn, ghm@htu.edu.cn

## Contents

|                                                                                        |      |
|----------------------------------------------------------------------------------------|------|
| 1. General information .....                                                           | S2   |
| 2. The preparation of starting materials.....                                          | S3   |
| 3. General procedure for the reaction .....                                            | S4   |
| 4. Scale-up synthesis and transformation of products .....                             | S5   |
| 5. X-ray data of <b>3x</b> .....                                                       | S6   |
| 6. Characterization of compounds.....                                                  | S7   |
| 7. Copies of <sup>1</sup> H, <sup>13</sup> C NMR and <sup>19</sup> F NMR spectra ..... | S51  |
| 8. Reference.....                                                                      | S116 |

## 1. General information

<sup>1</sup>H NMR and <sup>13</sup>C NMR spectra were recorded on Bruker Avance III HD 600 or Avance 400 MHz spectrometer. Chemical shifts are recorded in ppm relative to tetramethylsilane with the solvent resonance as the internal standard. Data are represented as follows: chemical shift, multiplicity (s = singlet, d = doublet, t = triplet, q = quartet, dd = doublet of doublets, m = multiplet), coupling constants (J) are in Hertz (Hz), and integration. Enantiomer excesses were determined by chiral HPLC analysis on Chiralcel IA/AS-H/ID/OD-H/IE/IG in comparison with the authentic racemates. Chiral HPLC analysis was recorded on Thermo Scientific Dionex Ultimate 3000 and Agilent Technologies 1260 Infinity. Optical rotations were recorded on Autopol Automatic Polarimeter, and were reported as follows:  $[\alpha]_D^{25}$  (c: g/100 mL, in CH<sub>2</sub>Cl<sub>2</sub>). High resolution mass spectra (HRMS) was recorded on an ABI/Sciex QStar Mass Spectrometer (ESI). Single crystal X-ray crystallography data were obtained on Supernova Atlas S2 CCD detector. Melting point (m.p.) data were obtained on X-5 micro melting point apparatus. For column chromatography, silica gel (200-300 mesh) was used as the stationary phase. Unless stated otherwise, all the solvent and reagents were purchased from commercial suppliers and used without further purification.

## 2. The preparation of starting materials

### Synthesis of Variously (*E*)- $\beta$ -heteroaryl Propenyl Ketone (**1a-1aa**)<sup>1</sup>:

#### Method A:

General Procedure for the Synthesis of **1a-1d**, **1j-1ad**:

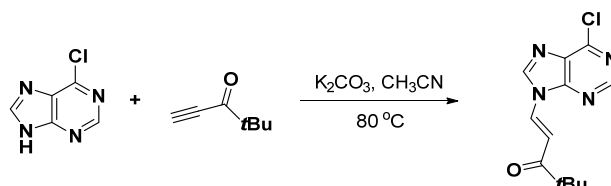

Purine, benzimidazole, imidazoles, (2.0 mmol),  $K_2CO_3$  (1.0 mmol, 138 mg) and  $CH_3CN$  (8.0 mL) were mixed in a 15 mL flask. The mixture was stirred for 10 min at  $80\text{ }^\circ\text{C}$ , afterwards the acetylenic ketone (2.2 mmol) was added. After the reaction was completed, which was determined by TLC, the resulting mixture was filtered, and evaporated under reduced pressure. The mixture was directly purified by flash chromatography on silica gel (Pet/EtOAc = 7:1 - 3:1) to afford the products (*E*)- $\beta$ -heteroaryl acrylates.

#### Method B:

General Procedure for the Synthesis of **1e-1i**:

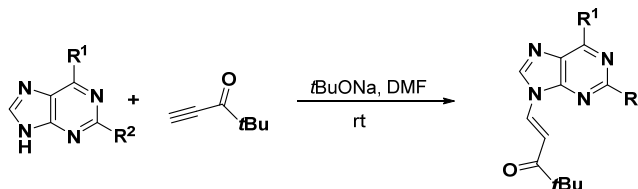

Purine, (2.0 mmol), sodium *tert*-butoxide (1.0 mmol) and  $DMF$  (5 mL) were mixed in a 15 mL flask. The mixture was stirred for 30 min at ambient temperature and then acetylenic ketone (2.2 mmol) was added. The reaction was complete after 6-12 h, as monitored by TLC, and the resulting mixture was partitioned between water and ethyl acetate, and the separated aqueous layer extracted with ethyl acetate (10 mL $\times$ 3). The combined organic layers were washed with brine (100 mL $\times$ 3), dried over anhydrous  $MgSO_4$ , filtered, and evaporated under reduced pressure. The mixture was directly purified by flash chromatography on silica gel (Pet/EtOAc = 7:1 - 1:1) to afford the products (*E*)- $\beta$ -heteroaryl acrylates.

### 3. General procedure for the reaction

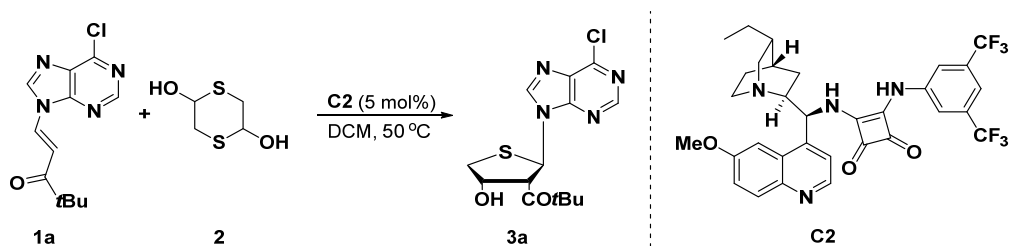

The synthetic procedure of **3a**: (*E*)-1-(6-chloro-9*H*-purin-9-yl)-4,4-dimethylpent-1-en-3-one **1a** (13.2 mg, 0.05 mmol), **2** (4.8 mg, 0.03 mmol), **C2** (1.58 mg, 5 mol %) in a reaction vessel. DCM (3.0 mL) was then added and the reaction mixture was stirred in oil bath at 50 °C for 48 h. Then the resulting mixture was cooled down to room temperature. The solvent was removed under reduced pressure. The residue was purified by column chromatography on a silica gel (eluent: Pet/EtOAc = 2:1-1:1) to give the pure product **3a**.

## 4. Scale-up synthesis and transformation of products

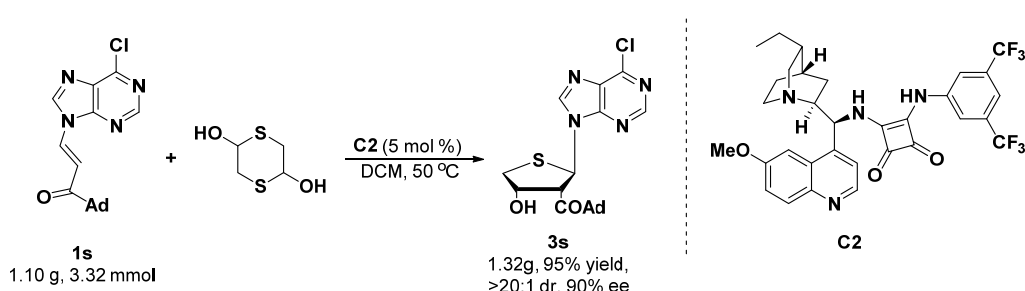

**Scale-up Synthesis:** To a round-bottom flask equipped with a stir bar was charged with (*E*)-1-(6-chloro-9*H*-purin-9-yl)-4,4-dimethylpent-1-en-3-one **1s** (1.10 g, 3.32 mmol), **2** (0.30 g, 1.99 mmol), **C2** (105 mg, 5 mol%) in a reaction vessel. DCM (100 mL) was then added and the reaction mixture was stirred in oil bath at 50 °C for 48 h. Then the resulting mixture was cooled down to room temperature. The solvent was removed under reduced pressure. The residue was purified by column chromatography on a silica gel (eluent: Pet/EtOAc = 2:1 - 1:1) to give the pure product **3s**.

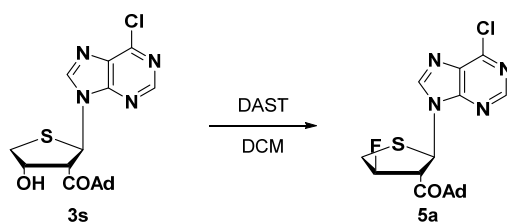

According to the literature,<sup>2</sup> In a test tube, **3s** (0.05 mmol, 20.9 mg, 90% ee) was dissolved in anhydrous CH<sub>2</sub>Cl<sub>2</sub> (1.0 mL), DAST (2.3 equiv., 0.13 mmol, 21.0 mg) was added under N<sub>2</sub> atmosphere. The resulting solution was stirred at room temperature for 1.5 h. After the reaction was completed, which was determined by TLC, the mixture was directly purified by flash chromatography on silica gel was purified by silica gel flash chromatography (Pet/EtOAc = 1:2) to yield the product **5a** as a colorless oil (75% yield, 15.8 mg, 90% ee).

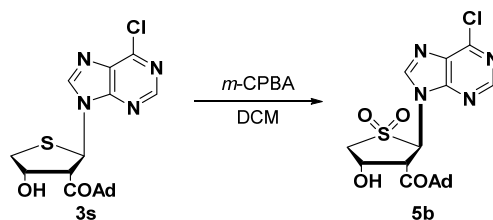

According to the literature,<sup>3</sup> In a test tube, **3s** (0.05 mmol, 20.9 mg, 90% ee) was dissolved in CH<sub>2</sub>Cl<sub>2</sub> (1.0 mL) and the reaction mixture was stirred at the room temperature. Then, *m*-CPBA (2.0 equiv, 0.1 mmol, 17.2 mg) was added. The reaction mixture was stirred overnight, After the reaction was completed, which was determined by TLC, the mixture was directly purified by flash chromatography on silica gel (Pet/EtOAc = 1:2) to afford product **5b** as a white solid (85% yield, 19.2 mg, 90% ee).

## 5. X-ray data of 3x

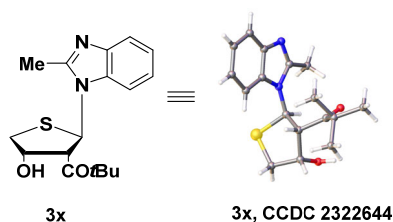

**Table S1 Crystal data and structure refinement for 3x.**

|                                             |                                                                 |
|---------------------------------------------|-----------------------------------------------------------------|
| Identification code                         | <b>3x</b>                                                       |
| Empirical formula                           | C <sub>17</sub> H <sub>22</sub> N <sub>2</sub> O <sub>2</sub> S |
| Formula weight                              | 318.42                                                          |
| Temperature/K                               | 293(2)                                                          |
| Crystal system                              | monoclinic                                                      |
| Space group                                 | P2 <sub>1</sub>                                                 |
| a/Å                                         | 10.90480(10)                                                    |
| b/Å                                         | 14.2184(2)                                                      |
| c/Å                                         | 11.99560(10)                                                    |
| α/°                                         | 90                                                              |
| β/°                                         | 110.3770(10)                                                    |
| γ/°                                         | 90                                                              |
| Volume/Å <sup>3</sup>                       | 1743.51(3)                                                      |
| Z                                           | 4                                                               |
| ρ <sub>calc</sub> /cm <sup>3</sup>          | 1.213                                                           |
| μ/mm <sup>-1</sup>                          | 1.713                                                           |
| F(000)                                      | 680.0                                                           |
| Crystal size/mm <sup>3</sup>                | 0.14 × 0.12 × 0.09                                              |
| Radiation                                   | Cu Kα (λ = 1.54184)                                             |
| 2θ range for data collection/°              | 7.862 to 142.782                                                |
| Index ranges                                | -13 ≤ h ≤ 13, -16 ≤ k ≤ 17, -14 ≤ l ≤ 14                        |
| Reflections collected                       | 44786                                                           |
| Independent reflections                     | 6391 [R <sub>int</sub> = 0.0746, R <sub>sigma</sub> = 0.0345]   |
| Data/restraints/parameters                  | 6391/1/407                                                      |
| Goodness-of-fit on F <sup>2</sup>           | 1.137                                                           |
| Final R indexes [I ≥ 2σ(I)]                 | R <sub>1</sub> = 0.0732, wR <sub>2</sub> = 0.2000               |
| Final R indexes [all data]                  | R <sub>1</sub> = 0.0768, wR <sub>2</sub> = 0.2085               |
| Largest diff. peak/hole / e Å <sup>-3</sup> | 0.26/-0.55                                                      |
| Flack/Hoof parameter                        | 0.01(3)/0.01(6)                                                 |

## 6. Characterization of compounds

### (*E*)-1-(6-chloro-9*H*-purin-9-yl)-4,4-dimethylpent-1-en-3-one (1a)

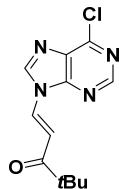

Pale-yellow solid, m.p. = 233.2-236.6 °C, 56% yield.

$R_f$  = 0.13 (Pet/EtOAc, 5/1, v/v).

$^1\text{H NMR}$  (400 MHz,  $\text{CDCl}_3$ )  $\delta$  8.89 (s, 1H), 8.32 (s, 1H), 8.09 (d,  $J$  = 14.0 Hz, 1H), 7.92 (d,  $J$  = 14.0 Hz, 1H), 1.27 (s, 9H).

$^{13}\text{C NMR}$  (100 MHz,  $\text{CDCl}_3$ )  $\delta$  203.7, 153.3, 152.2, 151.6, 144.6, 133.1, 132.1, 114.1, 43.8, 26.2.

**HRMS** (ESI-TOF)  $m/z$ :  $[\text{M}+\text{H}]^+$  calcd for  $\text{C}_{12}\text{H}_{14}\text{ClN}_4\text{O}$   $m/z$  265.0851, found 265.0845.

### (*E*)-1-(6-bromo-9*H*-purin-9-yl)-4,4-dimethylpent-1-en-3-one (1b)

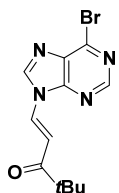

Pale-yellow solid, m.p. 238.1-241.3 °C, 62% yield.

$R_f$  = 0.14 (Pet/EtOAc, 5/1, v/v).

$^1\text{H NMR}$  (600 MHz,  $\text{CDCl}_3$ )  $\delta$  8.85 (s, 1H), 8.32 (s, 1H), 8.07 (d,  $J$  = 13.8 Hz, 1H), 7.92 (d,  $J$  = 13.8 Hz, 1H), 1.27 (s, 9H).

$^{13}\text{C NMR}$  (100 MHz,  $\text{CDCl}_3$ )  $\delta$  203.8, 153.2, 150.3, 144.5, 144.2, 135.7, 132.2, 114.1, 43.8, 26.2.

**HRMS** (ESI-TOF)  $m/z$ :  $[\text{M}+\text{H}]^+$  calcd for  $\text{C}_{12}\text{H}_{14}\text{BrN}_4\text{O}$  309.0346, found 309.0342.

### (*E*)-1-(6-iodo-9*H*-purin-9-yl)-4,4-dimethylpent-1-en-3-one (1c)

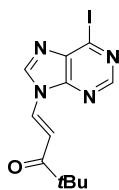

Pale-yellow solid, m.p. 247.5-250.9 °C, 57% yield.

$R_f$  = 0.13 (Pet/EtOAc, 5/1, v/v).

**<sup>1</sup>H NMR** (400 MHz, CDCl<sub>3</sub>) δ 8.77 (s, 1H), 8.33 (s, 1H), 8.06 (d, *J* = 14.0 Hz, 1H), 7.92 (d, *J* = 14.0 Hz, 1H), 1.27 (s, 9H).

**<sup>13</sup>C NMR** (100 MHz, CDCl<sub>3</sub>) δ 203.8, 153.2, 147.9, 144.0, 144.6, 132.3, 123.0, 114.1, 43.8, 26.2.

**HRMS** (ESI-TOF) *m/z*: [M+H]<sup>+</sup> calcd for C<sub>12</sub>H<sub>14</sub>N<sub>4</sub>O 357.0207, found 357.0200.

***tert*-butyl(*E*)-(tert-butoxycarbonyl)(9-(4,4-dimethyl-3-oxopent-1-en-1-yl)-9*H*-purin-6-yl)carbamate (1d)**

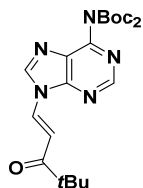

white solid, m.p. 37.6-46.4 °C, 39% yield.

*R<sub>f</sub>* = 0.11 (Pet/EtOAc, 8/1, v/v).

**<sup>1</sup>H NMR** (400 MHz, CDCl<sub>3</sub>) δ 8.98 (s, 1H), 8.23 (s, 1H), 8.08 (d, *J* = 14.0 Hz, 1H), 7.93 (d, *J* = 14.0 Hz, 1H), 1.46 (s, 18H), 1.27 (s, 9H).

**<sup>13</sup>C NMR** (100 MHz, CDCl<sub>3</sub>) δ 204.0, 153.4, 150.4, 144.0, 132.4, 113.4, 84.2, 43.8, 27.9, 26.3.

**HRMS** (ESI-TOF) *m/z*: [M+H]<sup>+</sup> calcd for C<sub>22</sub>H<sub>32</sub>N<sub>5</sub>O<sub>5</sub> 468.2217, found 468.2209.

**(*E*)-1-(6-methoxy-9*H*-purin-9-yl)-4,4-dimethylpent-1-en-3-one (1e)**

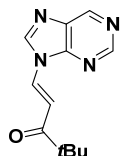

Pale-yellow solid, m.p. 178.5-182.8 °C, 49% yield.

*R<sub>f</sub>* = 0.10 (Pet/EtOAc, 3/1, v/v).

**<sup>1</sup>H NMR** (600 MHz, CDCl<sub>3</sub>) δ 9.22 (s, 1H), 9.13 (s, 1H), 8.27 (s, 1H), 8.10 (d, *J* = 13.8 Hz, 1H), 7.97 (d, *J* = 14.4 Hz, 1H), 1.28 (s, 9H).

**<sup>13</sup>C NMR** (150 MHz, CDCl<sub>3</sub>) δ 204.1, 153.9, 151.3, 149.5, 144.8, 135.4, 132.4, 113.4, 43.8, 29.8, 26.3.

**HRMS** (ESI-TOF): [M+H]<sup>+</sup> calcd for C<sub>12</sub>H<sub>15</sub>N<sub>4</sub>O 231.1240, found 231.1239.

**(*E*)-1-(6-methoxy-9*H*-purin-9-yl)-4,4-dimethylpent-1-en-3-one (1f)**

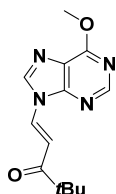



white solid, m.p. 196.7-201.2 °C, 65% yield.

R<sub>f</sub> = 0.11 (Pet/EtOAc, 5/1, v/v).

<sup>1</sup>H NMR (400 MHz, CDCl<sub>3</sub>) δ 8.66 (s, 1H), 8.11 (s, 1H), 8.08 (d, *J* = 14.0 Hz, 1H), 7.88 (d, *J* = 14.0 Hz, 1H), 4.22 (s, 3H) 1.27 (s, 9H).

<sup>13</sup>C NMR (100 MHz, CDCl<sub>3</sub>) δ 204.1, 161.5, 153.5, 151.9, 141.7, 132.8, 113.0, 54.6, 43.8, 26.3.

HRMS (ESI-TOF): [M+H]<sup>+</sup> calcd for C<sub>13</sub>H<sub>17</sub>N<sub>4</sub>O<sub>2</sub> 261.1346, found 261.1340.

**(*E*)-1-(6-amino-9*H*-purin-9-yl)-4,4-dimethylpent-1-en-3-one (1g)**

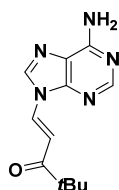

Pale-yellow solid, m.p. 227.7-230.0 °C, 42% yield.

R<sub>f</sub> = 0.15 (EtOAc).

<sup>1</sup>H NMR (400 MHz, DMSO-*d*<sub>6</sub>) δ 8.72 (s, 1H), 8.28 (s, 1H), 8.11 (d, *J* = 14.0 Hz, 1H), 7.79 (d, *J* = 14.0 Hz, 1H), 7.51 (br, 1H), 1.18 (s, 9H).

<sup>13</sup>C NMR (100 MHz, DMSO-*d*<sub>6</sub>) δ 203.3, 156.2, 153.8, 149.3, 140.0, 132.9, 119.3, 110.5, 43.0, 25.8.

HRMS (ESI-TOF): [M+Na]<sup>+</sup> calcd for C<sub>12</sub>H<sub>15</sub>N<sub>5</sub>NaO 268.1169 found 268.1168.

**(*E*)-1-(6-chloro-2-fluoro-9*H*-purin-9-yl)-4,4-dimethylpent-1-en-3-one (1h)**

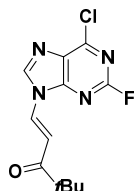

Pale-yellow solid, m.p. 196.7-201.2 °C, 52% yield.

R<sub>f</sub> = 0.11 (Pet/EtOAc, 5/1, v/v).

<sup>1</sup>H NMR (400 MHz, CDCl<sub>3</sub>) δ 8.29 (s, 1H), 8.01 (d, *J* = 14.0 Hz, 1H), 7.76 (d, *J* = 14.0 Hz, 1H), 1.27 (s, 9H).

<sup>13</sup>C NMR (100 MHz, CDCl<sub>3</sub>) δ 203.5, 159.0, 156.8, 154.1, 145.1 (d, *J*<sub>C-F</sub> = 4.0 Hz, 1H), 131.7, 125.8, 114.5, 113.8, 43.9, 26.4, 26.1.

HRMS (ESI-TOF): [M+H]<sup>+</sup> calcd for C<sub>12</sub>H<sub>13</sub>ClFN<sub>4</sub>O 283.0756, found 283.0751.

**(E)-1-(2-amino-6-chloro-9H-purin-9-yl)-4,4-dimethylpent-1-en-3-one (1i)**

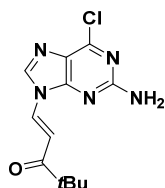

Pale-yellow solid, m.p. 234.1-237.0 °C, 52% yield.

$R_f = 0.15$  (EtOAc).

$^1\text{H NMR}$  (400 MHz, DMSO- $d_6$ )  $\delta$  8.70 (s, 1H), 7.99 (d,  $J = 14.0$  Hz, 1H), 7.69 (d,  $J = 14.4$  Hz, 1H), 7.27 (br, 1H), 1.18 (s, 9H).

$^{13}\text{C NMR}$  (100 MHz, DMSO- $d_6$ )  $\delta$  203.3, 160.4, 153.5, 150.0, 141.2, 132.1, 123.8, 110.7, 39.9, 25.7.

**HRMS** (ESI-TOF):  $[\text{M}+\text{Na}]^+$  calcd for  $\text{C}_{12}\text{H}_{14}\text{ClN}_5\text{NaOS}$  302.0779 found 302.0775.

**(E)-9-(4,4-dimethyl-3-oxopent-1-en-1-yl)-1,3-dimethyl-3,9-dihydro-1H-purine-2,6-dione (1j)**

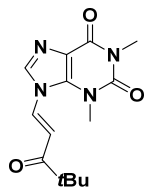

Pale-yellow solid, m.p. 216.1-219.0 °C, 53% yield.

$R_f = 0.13$  (Pet/EtOAc, 2/1, v/v).

$^1\text{H NMR}$  (400 MHz,  $\text{CDCl}_3$ )  $\delta$  8.09 (d,  $J = 13.6$  Hz, 1H), 7.96 (s, 1H), 7.79 (d,  $J = 14.0$  Hz, 1H), 3.62 (s, 3H), 3.44 (s, 3H), 1.23 (s, 9H).

$^{13}\text{C NMR}$  (100 MHz,  $\text{CDCl}_3$ )  $\delta$  203.7, 154.7, 151.4, 150.8, 141.9, 133.8, 114.4, 43.8, 30.3, 28.8, 26.2.

**HRMS** (ESI-TOF):  $[\text{M}+\text{Na}]^+$  calcd for  $\text{C}_{14}\text{H}_{18}\text{N}_4\text{NaO}_3$  313.1271 found 313.1269.

**(E)-1-(4-chloro-7H-pyrrolo[2,3-d]pyrimidin-7-yl)-4,4-dimethylpent-1-en-3-one (1k)**

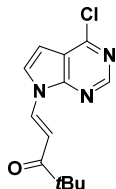

White solid, m.p. 162.8-166.3 °C, 70% yield.

$R_f = 0.14$  (Pet/EtOAc, 6/1, v/v).

$^1\text{H NMR}$  (400 MHz,  $\text{CDCl}_3$ )  $\delta$  8.73 (s, 1H), 8.32 (d,  $J = 14.0$  Hz, 1H), 7.51 (d,  $J = 4.0$  Hz, 1H), 7.31 (d,  $J = 14.0$  Hz, 1H), 6.75 (d,  $J = 4.0$  Hz, 1H), 1.23 (s, 9H).

$^{13}\text{C NMR}$  (100 MHz,  $\text{CDCl}_3$ )  $\delta$  203.8, 152.9, 152.3, 152.0, 134.6, 126.9, 119.5, 109.6, 103.7, 43.5, 26.4.

**HRMS** (ESI-TOF):  $[M+H]^+$  calcd for  $C_{13}H_{15}ClN_3O$  264.0898, found 264.0893.

**(E)-1-(6-chloro-9H-purin-9-yl)-4,4-dimethylhex-1-en-3-one (1l)**

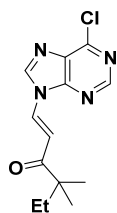

white solid, m.p. 155.3-157.0 °C, 68% yield.

$R_f$  = 0.14 (Pet/EtOAc, 5/1, v/v).

**$^1H$  NMR** (600 MHz,  $CDCl_3$ )  $\delta$  8.90 (s, 1H), 8.33 (s, 1H), 8.09 (d,  $J$  = 13.8 Hz, 1H), 7.91 (d,  $J$  = 13.8 Hz, 1H), 1.70 (q,  $J$  = 7.8 Hz, 2H), 1.22 (s, 6H), 0.85 (t,  $J$  = 7.8 Hz, 3H).

**$^{13}C$  NMR** (150 MHz,  $CDCl_3$ )  $\delta$  203.7, 153.3, 152.1, 151.5, 144.7, 133.1, 132.1, 114.2, 47.6, 32.4, 23.6, 9.2.

**HRMS** (ESI-TOF):  $[M+H]^+$  calcd for  $C_{13}H_{16}ClN_4O$  279.1007, found 279.0999.

**(E)-1-(6-chloro-9H-purin-9-yl)-4,4-dimethylhept-1-en-3-one (1m)**

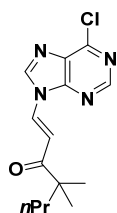

white solid; m.p. 130.3-135.5 °C; 69% yield.

$R_f$  = 0.12 (Pet/EtOAc, 5/1, v/v).

**$^1H$  NMR** (600 MHz,  $CDCl_3$ )  $\delta$  8.90 (s, 1H), 8.32 (s, 1H), 8.08 (d,  $J$  = 13.8 Hz, 1H), 7.91 (d,  $J$  = 13.8 Hz, 1H), 1.60-1.63 (m, 2H), 1.24-1.26 (m, 2H), 1.23 (s, 6H), 0.91 (t,  $J$  = 7.2 Hz, 3H).

**$^{13}C$  NMR** (150 MHz,  $CDCl_3$ )  $\delta$  203.7, 153.3, 152.1, 151.5, 144.6, 133.1, 132.0, 114.2, 47.4, 42.2, 24.1, 18.2, 14.8.

**HRMS** (ESI-TOF):  $[M+H]^+$  calcd for  $C_{14}H_{18}ClN_4O$  293.1164, found 293.1159.

**(E)-1-(6-chloro-9H-purin-9-yl)-4,4-dimethyloct-1-en-3-one (1n)**

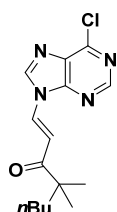

white solid, m.p. 130.3-135.5 °C, 75% yield.

$R_f = 0.12$  (Pet/EtOAc, 5/1, v/v).

$^1\text{H NMR}$  (600 MHz,  $\text{CDCl}_3$ )  $\delta$  8.89 (s, 1H), 8.35 (s, 1H), 8.10 (d,  $J = 13.8$  Hz, 1H), 7.92 (d,  $J = 13.8$  Hz, 1H), 1.62-1.65 (m, 2H), 1.26-1.31 (m, 2H), 1.22 (s, 6H), 1.16-1.20 (m, 2H), 0.86 (t,  $J = 7.2$  Hz, 3H).

$^{13}\text{C NMR}$  (150 MHz,  $\text{CDCl}_3$ )  $\delta$  203.8, 153.3, 152.1, 151.5, 144.7, 133.1, 132.1, 114.2, 47.3, 39.6, 27.1, 24.1, 23.4, 14.1.

**HRMS** (ESI-TOF):  $[\text{M}+\text{H}]^+$  calcd for  $\text{C}_{15}\text{H}_{20}\text{ClN}_4\text{O}$  307.1320, found 307.1320.

**(E)-1-(6-chloro-9H-purin-9-yl)-4,4-dimethylhepta-1,6-dien-3-one (1o)**

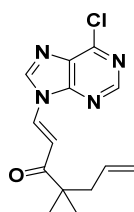

White solid, m.p. 110.9-114.5 °C, 71% yield.

$R_f = 0.12$  (Pet/EtOAc, 5/1, v/v).

$^1\text{H NMR}$  (600 MHz,  $\text{CDCl}_3$ )  $\delta$  8.89 (s, 1H), 8.35 (s, 1H), 8.09 (d,  $J = 13.8$  Hz, 1H), 7.94 (d,  $J = 13.8$  Hz, 1H), 5.67-5.74 (m, 1H), 5.05-5.09 (m, 2H), 2.39 (d,  $J = 7.2$  Hz, 2H), 1.24 (s, 6H).

$^{13}\text{C NMR}$  (150 MHz,  $\text{CDCl}_3$ )  $\delta$  203.0, 153.3, 152.2, 151.6, 144.7, 133.7, 133.1, 132.2, 118.6, 114.3, 47.2, 43.8, 23.9.

**HRMS** (ESI-TOF):  $[\text{M}+\text{H}]^+$  calcd for  $\text{C}_{14}\text{H}_{16}\text{ClN}_4\text{O}$  291.1007, found 291.1003.

**(E)-1-(6-chloro-9H-purin-9-yl)-4,4-diethylhex-1-en-3-one (1p)**

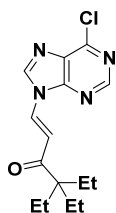

White solid, m.p. 185.5-188.1 °C, 62% yield.

$R_f = 0.18$  (Pet/EtOAc, 5/1, v/v).

$^1\text{H NMR}$  (400 MHz,  $\text{CDCl}_3$ )  $\delta$  8.90 (s, 1H), 8.33 (s, 1H), 8.10 (d,  $J = 13.6$  Hz, 1H), 7.94 (d,  $J = 14.0$  Hz, 1H), 1.70 (q,  $J = 7.6$  Hz, 6H), 0.78 (t,  $J = 7.6$  Hz, 9H).

$^{13}\text{C NMR}$  (100 MHz,  $\text{CDCl}_3$ )  $\delta$  203.9, 153.3, 152.1, 151.6, 144.7, 133.1, 131.9, 114.5, 54.5, 25.1, 8.3.

**HRMS** (ESI-TOF):  $[\text{M}+\text{Na}]^+$  calcd for  $\text{C}_{15}\text{H}_{19}\text{ClN}_4\text{Na O}$  329.1140, found 329.1139.

**(E)-3-(6-chloro-9H-purin-9-yl)-1-(1-methylcyclohexyl)prop-2-en-1-one (1q)**

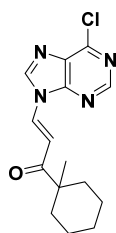

White solid, m.p. 172.2-176.7 °C, 86% yield.

R<sub>f</sub> = 0.14 (Pet/EtOAc, 5/1, v/v).

<sup>1</sup>H NMR (600 MHz, CDCl<sub>3</sub>) δ 8.90 (s, 1H), 8.32 (s, 1H), 8.09 (d, *J* = 13.8 Hz, 1H), 7.92 (d, *J* = 13.8 Hz, 1H), 2.04-2.07 (m, 2H), 1.58-1.62 (m, 2H), 1.48-1.51 (m, 1H), 1.36-1.44 (m, 5H), 1.20 (s, 3H).

<sup>13</sup>C NMR (150 MHz, CDCl<sub>3</sub>) δ 203.8, 153.3, 152.1, 151.5, 144.6, 133.1, 132.1, 114.3, 47.8, 34.6, 26.0, 23.0.

HRMS (ESI-TOF): [M+H]<sup>+</sup> calcd for C<sub>15</sub>H<sub>18</sub>ClN<sub>4</sub>O 305.1164, found 305.1157.

**(E)-3-(6-chloro-9H-purin-9-yl)-1-(1-methylcyclopentyl)prop-2-en-1-one (1r)**

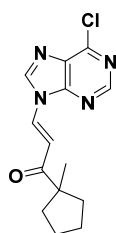

white solid, m.p. 182.1-182.9 °C, 81% yield.

R<sub>f</sub> = 0.13 (Pet/EtOAc, 5/1, v/v).

<sup>1</sup>H NMR (400 MHz, CDCl<sub>3</sub>) δ 8.89 (s, 1H), 8.31 (s, 1H), 8.10 (d, *J* = 14.0 Hz, 1H), 7.82 (d, *J* = 14.0 Hz, 1H), 2.13-2.19 (m, 2H), 1.69-1.79 (m, 4H), 1.52-1.55 (m, 2H), 1.32 (s, 3H).

<sup>13</sup>C NMR (100 MHz, CDCl<sub>3</sub>) δ 202.9, 153.3, 152.2, 144.5, 133.1, 131.9, 115.2, 55.2, 36.5, 25.6, 24.5.

HRMS (ESI-TOF): [M+H]<sup>+</sup> calcd for C<sub>14</sub>H<sub>16</sub>ClN<sub>4</sub>O 291.1007, found 291.0998.

**(E)-1-((3r,5r,7r)-adamantan-1-yl)-3-(6-chloro-9H-purin-9-yl)prop-2-en-1-one (1s)**

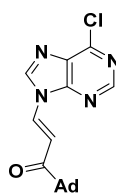

white solid, m.p. 280.8-283.0 °C, 75% yield.

R<sub>f</sub> = 0.12 (Pet/EtOAc, 5/1, v/v).

**<sup>1</sup>H NMR** (600 MHz, CDCl<sub>3</sub>) δ 8.92 (s, 1H), 8.31 (s, 1H), 8.07 (d, *J* = 13.8 Hz, 1H), 7.91 (d, *J* = 14.4 Hz, 1H), 2.11-2.15 (m, 3H), 1.87-1.95 (m, 6H), 1.73-1.83 (m, 6H).

**<sup>13</sup>C NMR** (150 MHz, CDCl<sub>3</sub>) δ 203.3, 153.4, 144.6, 133.1, 132.1, 113.7, 46.1, 38.0, 36.6, 29.9, 29.9, 28.0.

**HRMS** (ESI-TOF): [M+H]<sup>+</sup> calcd for C<sub>18</sub>H<sub>20</sub>ClN<sub>4</sub>O 343.1320, found 343.1313.

**(*E*)-1-(1*H*-benzo[d]imidazol-1-yl)-4,4-dimethylpent-1-en-3-one (1t)**

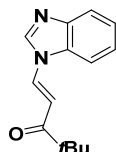

White solid, m.p. 151.9-155.6 °C, 76% yield.

R<sub>f</sub> = 0.10 (Pet/EtOAc, 4/1, v/v).

**<sup>1</sup>H NMR** (600 MHz, CDCl<sub>3</sub>) δ 8.24 (s, 1H), 8.15 (d, *J* = 13.8 Hz, 1H), 7.85 (d, *J* = 7.8 Hz, 1H), 7.63 (d, *J* = 7.8 Hz, 1H), 7.38-7.45 (m, 2H), 6.97 (d, *J* = 13.8 Hz, 1H), 1.27 (s, 9H).

**<sup>13</sup>C NMR** (150 MHz, CDCl<sub>3</sub>) δ 203.6, 144.7, 141.7, 134.6, 132.5, 125.1, 124.5, 121.4, 111.2, 108.2, 43.6, 26.5.

**HRMS** (ESI-TOF): [M+H]<sup>+</sup> calcd for C<sub>14</sub>H<sub>17</sub>N<sub>2</sub>O 229.1335, found 229.3025.

**(*E*)-1-(2-chloro-1*H*-benzo[d]imidazol-1-yl)-4,4-dimethylpent-1-en-3-one (1u)**

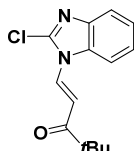

White solid, m.p. 151.9-155.6 °C, 68% yield.

R<sub>f</sub> = 0.10 (Pet/EtOAc, 4/1, v/v).

**<sup>1</sup>H NMR** (600 MHz, CDCl<sub>3</sub>) δ 8.17 (d, *J* = 14.4 Hz, 1H), 7.71 (d, *J* = 7.8 Hz, 1H), 7.59 (d, *J* = 8.4 Hz, 1H), 7.34-7.42 (m, 2H), 7.09 (d, *J* = 13.8 Hz, 1H), 1.26 (s, 9H).

**<sup>13</sup>C NMR** (150 MHz, CDCl<sub>3</sub>) δ 203.4, 142.4, 141.4, 134.1, 133.3, 125.0, 124.8, 120.5, 111.8, 111.0, 43.6, 26.4.

**HRMS** (ESI-TOF): [M+H]<sup>+</sup> calcd for C<sub>14</sub>H<sub>16</sub>ClN<sub>2</sub>O 263.0946, found 263.0947.

**(E)-1-(2-bromo-1H-benzo[d]imidazol-1-yl)-4,4-dimethylpent-1-en-3-one (1v)**

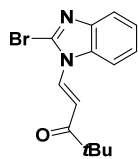

White solid, m.p. 113.6-117.1 °C, 52% yield.

$R_f$  = 0.10 (Pet/EtOAc, 4/1, v/v).

$^1\text{H NMR}$  (400 MHz,  $\text{CDCl}_3$ )  $\delta$  8.19 (d,  $J$  = 14.0 Hz, 1H), 7.71-7.77 (m, 1H), 7.59-7.64 (m, 1H), 7.33-7.43 (m, 2H), 7.11 (d,  $J$  = 14.0 Hz, 1H), 1.27 (s, 9H).

$^{13}\text{C NMR}$  (100 MHz,  $\text{CDCl}_3$ )  $\delta$  203.4, 144.1, 135.5, 133.7, 131.1, 125.0, 124.7, 120.5, 111.8, 111.2, 43.6, 26.4.

**HRMS** (ESI-TOF):  $[\text{M}+\text{Na}]^+$  calcd for  $\text{C}_{14}\text{H}_{16}\text{BrN}_2\text{NaO}$  329.0260 found 329.0252.

**(E)-1-(2-ethyl-1H-benzo[d]imidazol-1-yl)-4,4-dimethylpent-1-en-3-one (1w)**

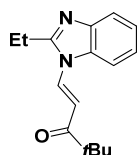

White solid, m.p. 99.8-102.5 °C, 76% yield.

$R_f$  = 0.12 (Pet/EtOAc, 4/1, v/v).

$^1\text{H NMR}$  (400 MHz,  $\text{CDCl}_3$ )  $\delta$  8.11 (d,  $J$  = 14.0 Hz, 1H), 7.72-7.78 (m, 1H), 7.56-7.63 (m, 1H), 7.29-7.38 (m, 2H), 7.00 (d,  $J$  = 14.0 Hz, 1H), 3.02 (q,  $J$  = 7.6 Hz, 2H), 1.48 (t,  $J$  = 7.6 Hz, 3H), 1.26 (s, 9H).

$^{13}\text{C NMR}$  (100 MHz,  $\text{CDCl}_3$ )  $\delta$  204.0, 157.3, 143.7, 135.0, 133.3, 124.1, 124.1, 120.3, 112.1, 109.2, 43.5, 26.5, 21.8, 11.6.

**HRMS** (ESI-TOF):  $[\text{M}+\text{H}]^+$  calcd for  $\text{C}_{15}\text{H}_{19}\text{N}_2\text{O}$  243.1492 found 243.1484.

**(E)-4,4-dimethyl-1-(2-methyl-1H-benzo[d]imidazol-1-yl) pent-1-en-3-one (1x)**

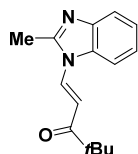

White solid, m.p. 73.3-76.9 °C, 58% yield.

$R_f$  = 0.12 (Pet/EtOAc, 4/1, v/v).

$^1\text{H NMR}$  (600 MHz,  $\text{CDCl}_3$ )  $\delta$  8.24 (d,  $J$  = 13.8 Hz, 1H), 7.65-7.69 (m, 1H), 7.53-7.58 (m, 1H), 7.27-7.33 (m, 2H), 6.96 (d,  $J$  = 13.8 Hz, 1H), 2.68 (s, 3H), 1.24 (s, 9H).

$^{13}\text{C}$  NMR (150 MHz,  $\text{CDCl}_3$ )  $\delta$  203.8, 152.8, 143.6, 135.1, 133.1, 124.1, 124.0, 120.1, 111.9, 109.0, 43.4, 26.4, 14.9.

HRMS (ESI-TOF):  $[\text{M}+\text{H}]^+$  calcd for  $\text{C}_{16}\text{H}_{21}\text{N}_2\text{O}$  257.1648 found 257.1650.

**(E)-4,4-dimethyl-1-(2-phenyl-1H-benzo[d]imidazol-1-yl)pent-1-en-3-one (1y)**

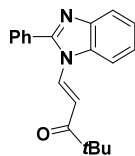

White solid, m.p. 157.8-161.8 °C, 66% yield.

$R_f$  = 0.20 (Pet/EtOAc, 5/1, v/v).

$^1\text{H}$  NMR (600 MHz,  $\text{CDCl}_3$ )  $\delta$  7.97 (d,  $J$  = 13.8 Hz, 1H), 7.53-7.60 (m, 2H), 7.45-7.50 (m, 3H), 7.40 (s, 1H), 7.22 (s, 1H), 6.67 (d,  $J$  = 13.8 Hz, 1H), 1.19 (s, 9H).

$^{13}\text{C}$  NMR (150 MHz,  $\text{CDCl}_3$ )  $\delta$  203.5, 150.1, 136.4, 130.9, 129.9, 129.7, 129.2, 129.0, 116.6, 109.9, 43.5, 26.3.

HRMS (ESI-TOF):  $[\text{M}+\text{H}]^+$  calcd for  $\text{C}_{20}\text{H}_{21}\text{N}_2\text{O}$  305.1648 found 305.1645.

**(E)-4,4-dimethyl-1-(2-(trifluoromethyl)-1H-benzo[d]imidazol-1-yl)pent-1-en-3-one (1z)**

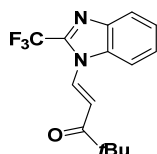

White solid, m.p. 76.9-80.9 °C, 63% yield.

$R_f$  = 0.40 (Pet/EtOAc, 5/1, v/v).

$^1\text{H}$  NMR (400 MHz,  $\text{CDCl}_3$ )  $\delta$  8.15 (dq,  $J$  = 1.2, 14.0 Hz, 1H), 7.94 (d,  $J$  = 8.0 Hz, 1H), 7.69 (d,  $J$  = 8.4 Hz, 1H), 7.53-7.58 (m, 1H), 7.46-7.51 (m, 1H), 7.14 (d,  $J$  = 13.6 Hz, 1H), 1.27 (s, 9H).

$^{13}\text{C}$  NMR (100 MHz,  $\text{CDCl}_3$ )  $\delta$  202.9, 141.8, 133.8 (q,  $J_{\text{C-F}}$  = 12.0 Hz, 1H), 133.5 (q,  $J_{\text{C-F}}$  = 8.0 Hz, 1H), 127.2, 125.4, 122.7, 114.5, 112.7, 43.7, 27.1, 26.2.

HRMS (ESI-TOF):  $[\text{M}+\text{H}]^+$  calcd for  $\text{C}_{15}\text{H}_{16}\text{F}_3\text{N}_2\text{O}$  297.1209 found 297.1206.

**(E)-1-(5,6-dimethyl-1H-benzo[d]imidazol-1-yl)-4,4-dimethylpent-1-en-3-one (1aa)**

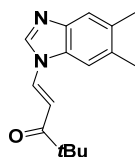

white solid, m.p. 174.2-177.9 °C, 54% yield.

$R_f$  = 0.10 (Pet/EtOAc, 3/1, v/v).



**<sup>1</sup>H NMR** (600 MHz, CDCl<sub>3</sub>) δ 8.12 (s, 1H), 8.10 (d, *J* = 14.4 Hz, 1H), 7.57 (s, 1H), 7.36 (s, 1H), 6.90 (d, *J* = 13.8 Hz, 1H), 2.42 (s, 3H), 2.37 (s, 3H), 1.26 (s, 9H).

**<sup>13</sup>C NMR** (150 MHz, CDCl<sub>3</sub>) δ 203.7, 143.2, 141.0, 134.8, 134.3, 133.4, 130.9, 121.3, 111.5, 107.5, 43.5, 26.5, 20.9, 20.4.

**HRMS** (ESI-TOF): [M+H]<sup>+</sup> calcd for C<sub>16</sub>H<sub>21</sub>N<sub>2</sub>O 257.1648 found 257.1652.

**(*E*)-1-(3*H*-imidazo[4,5-*c*]pyridin-3-yl)-4,4-dimethylpent-1-en-3-one (1ab)**

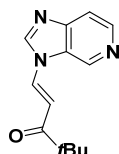

White solid, m.p. 203.0-207.1 °C, 62% yield.

R<sub>f</sub> = 0.10 (Pet/EtOAc, 2/1, v/v).

**<sup>1</sup>H NMR** (600 MHz, CDCl<sub>3</sub>) δ 9.18 (s, 1H), 8.61 (d, *J* = 5.4 Hz, 1H), 8.29 (s, 1H), 8.11 (d, *J* = 13.8 Hz, 1H), 7.57 (d, *J* = 5.4 Hz, 1H), 7.00 (d, *J* = 14.4 Hz, 1H), 1.27 (s, 9H).

**<sup>13</sup>C NMR** (150 MHz, CDCl<sub>3</sub>) δ 203.1, 144.6, 144.2, 142.5, 141.4, 137.5, 133.6, 110.2, 106.5, 43.7, 26.4.

**HRMS** (ESI-TOF): [M+H]<sup>+</sup> calcd for C<sub>13</sub>H<sub>16</sub>N<sub>3</sub>O 230.1288 found 230.1283.

**(*E*)-4,4-dimethyl-1-(2-phenyl-1*H*-imidazol-1-yl)pent-1-en-3-one (1ac)**

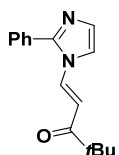

White solid, m.p. 85.1-88.3 °C, 71% yield.

R<sub>f</sub> = 0.10 (Pet/EtOAc, 5/1, v/v).

**<sup>1</sup>H NMR** (600 MHz, CDCl<sub>3</sub>) δ 7.97 (d, *J* = 13.8 Hz, 1H), 7.54-7.58 (m, 2H), 7.46-7.52 (m, 3H), 7.40 (s, 1H), 7.22 (s, 1H), 6.67 (d, *J* = 13.8 Hz, 1H), 1.19 (s, 9H).

**<sup>13</sup>C NMR** (150 MHz, CDCl<sub>3</sub>) δ 203.5, 150.1, 136.4, 130.9, 129.9, 129.7, 129.2, 129.0, 116.6, 109.9, 43.5, 26.3.

**HRMS** (ESI-TOF): [M+H]<sup>+</sup> calcd for C<sub>16</sub>H<sub>19</sub>N<sub>2</sub>O 255.1492 found 255.1484.

**(*E*)-1-(4,5-diphenyl-1*H*-imidazol-1-yl)-4,4-dimethylpent-1-en-3-one (1ad)**

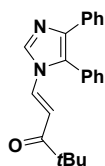

White solid, m.p. 222.6-225.4 °C, 65% yield.

$R_f = 0.10$  (Pet/EtOAc, 5/1, v/v).

**$^1\text{H NMR}$**  (400 MHz,  $\text{CDCl}_3$ )  $\delta$  8.05 (s, 1H), 7.62 (d,  $J = 14.4$  Hz, 1H), 7.46-7.52 (m, 5H), 7.32-7.39 (m, 2H), 7.16-7.25 (m, 3H), 6.54 (d,  $J = 14.0$  Hz, 1H), 1.12 (s, 9H).

**$^{13}\text{C NMR}$**  (100 MHz,  $\text{CDCl}_3$ )  $\delta$  203.4, 135.4, 134.8, 131.2, 129.6, 129.6, 129.3, 128.4, 127.3, 127.1, 110.0, 43.4, 26.2.

**HRMS** (ESI-TOF):  $[\text{M}+\text{H}]^+$  calcd for  $\text{C}_{22}\text{H}_{23}\text{N}_2\text{O}$  331.1805 found 331.1799.

**1-((2*R*, 3*S*, 4*S*)-2-(6-chloro-9*H*-purin-9-yl)-4-hydroxytetrahydrothiophen-3-yl)-2, 2-dimethylpropan-1-one (3a)**

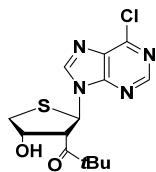

Pale yellow gum, 15.8 mg, 93% yield.

$R_f = 0.10$  (Pet/EtOAc, 2/1, v/v).

$[\alpha]_D^{22} = -85.1$  ( $c = 0.53$ ,  $\text{CH}_2\text{Cl}_2$ ).

**HPLC** CHIRALCEL IE, n-hexane/2-propanol = 70/30, flow rate = 0.8 mL/min,  $\lambda = 256$  nm, retention time: 18.332 min (major), 25.393 min (minor), 91% ee, >20:1 dr.

**$^1\text{H}$  NMR** (400 MHz,  $\text{CDCl}_3$ )  $\delta$  8.77 (s, 1H), 8.23 (s, 1H), 6.66 (d,  $J = 8.4$  Hz, 1H), 4.94-4.98 (m, 1H), 4.64 (dd,  $J = 3.6, 8.0$  Hz, 1H), 3.98 (dd,  $J = 3.2, 11.6$  Hz, 1H), 3.27 (dd,  $J = 1.6, 11.6$  Hz, 1H), 0.93 (s, 9H).

**$^{13}\text{C}$  NMR** (150 MHz,  $\text{CDCl}_3$ )  $\delta$  212.5, 152.1, 151.8, 151.2, 145.0, 132.9, 77.0, 64.8, 59.2, 45.1, 43.5, 25.6.

**HRMS** (ESI-TOF):  $[\text{M}+\text{H}]^+$  calcd for  $\text{C}_{14}\text{H}_{18}\text{ClN}_4\text{O}_2\text{S}$  341.0834 found 341.0833.

Racemic sample of **3a**

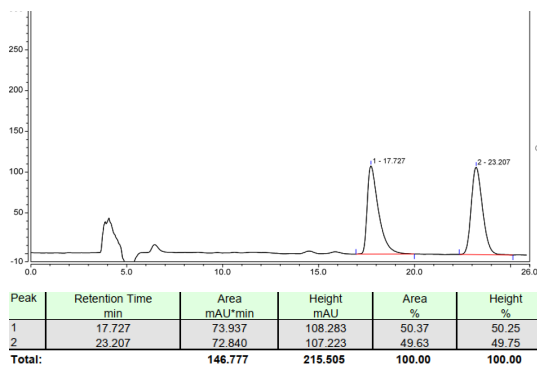

**3a**

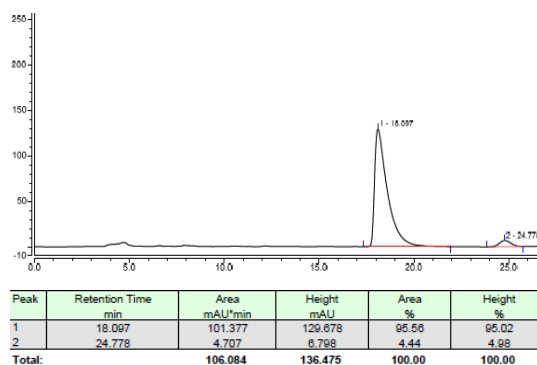

**1-((2*R*, 3*S*, 4*S*)-2-(6-bromo-9*H*-purin-9-yl)-4-hydroxytetrahydrothiophen-3-yl)-2,2-dimethylpropan-1-one (3b)**

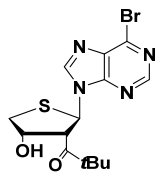

Pale yellow solid, m.p. 129.2-134.6 °C, 18.5 mg, 96% yield.

$R_f = 0.12$  (Pet/EtOAc, 2/1, v/v).

$[\alpha]_D^{22} = -79.1$  ( $c = 0.92$ ,  $\text{CH}_2\text{Cl}_2$ ).

**HPLC** CHIRALCEL IE, n-hexane/2-propanol = 70/30, flow rate = 0.8 mL/min,  $\lambda = 256$  nm, retention time: 18.578 min (major), 31.713 min (minor), 90% ee, >20:1 dr.

**$^1\text{H NMR}$**  (600 MHz,  $\text{CDCl}_3$ )  $\delta$  8.73 (s, 1H), 8.23 (s, 1H), 6.64 (d,  $J = 8.4$  Hz, 1H), 4.96 (s, 1H), 4.63 (dd,  $J = 3.6, 8.4$  Hz, 1H), 3.98 (dd,  $J = 3.0, 11.4$  Hz, 1H), 3.27 (dd,  $J = 1.8, 12.0$  Hz, 1H), 3.01 (s, 1H), 0.94 (s, 9H).

**$^{13}\text{C NMR}$**  (100 MHz,  $\text{CDCl}_3$ )  $\delta$  212.6, 152.0, 149.9, 144.8, 144.0, 135.5, 77.0, 64.9, 59.2, 45.2, 43.6, 25.6.

**HRMS** (ESI-TOF):  $[\text{M}+\text{Na}]^+$  calcd for  $\text{C}_{14}\text{H}_{17}\text{BrN}_4\text{NaO}_2\text{S}$  407.0148 found 407.0150.

Racemic sample of **3b**

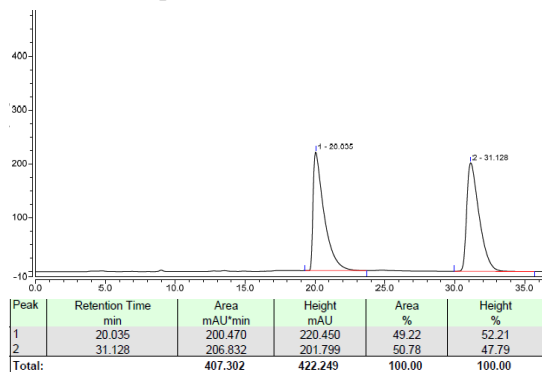

**3b**

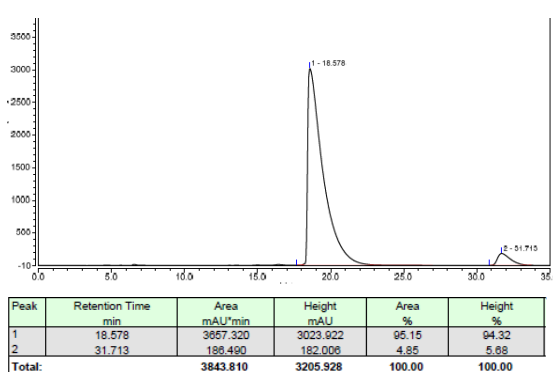

**1-((2*R*, 3*S*, 4*S*)-4-hydroxy-2-(6-iodo-9*H*-purin-9-yl)tetrahydrothiophen-3-yl)-2,2-dimethylpropan-1-one (3c)**

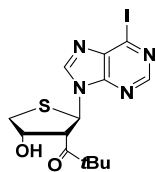

Colorless oil, 21 mg, 96% yield.

$R_f = 0.12$  (Pet/EtOAc, 2/1, v/v).

$[\alpha]_D^{22} = -67.8$  ( $c = 0.70$ ,  $\text{CH}_2\text{Cl}_2$ ).

**HPLC** CHIRALCEL IC, n-hexane/2-propanol = 80/20, flow rate = 0.8 mL/min,  $\lambda = 256$  nm, retention time: 17.593 min (minor), 19.765 min (major), 88% ee, >20:1 dr.

**$^1\text{H NMR}$**  (600 MHz,  $\text{CDCl}_3$ )  $\delta$  8.65 (s, 1H), 8.21 (s, 1H), 6.61 (d,  $J = 7.8$  Hz, 1H), 4.95 (s, 1H), 4.64 (dd,  $J = 4.2, 8.1$  Hz, 1H), 3.98 (dd,  $J = 3.0, 12.0$  Hz, 1H), 3.27 (dd,  $J = 1.8, 11.4$  Hz, 1H), 2.97 (d,  $J = 6.0$  Hz, 1H), 0.94 (s, 9H).

**$^{13}\text{C NMR}$**  (150 MHz,  $\text{CDCl}_3$ )  $\delta$  212.7, 152.0, 147.4, 144.2, 139.8, 123.0, 77.1, 59.2, 45.2, 43.6, 25.6.

**HRMS** (ESI-TOF):  $[\text{M}+\text{Na}]^+$  calcd for  $\text{C}_{14}\text{H}_{17}\text{IN}_4\text{NaO}_2\text{S}$  455.0009 found 455.0006.

Racemic sample of **3c**

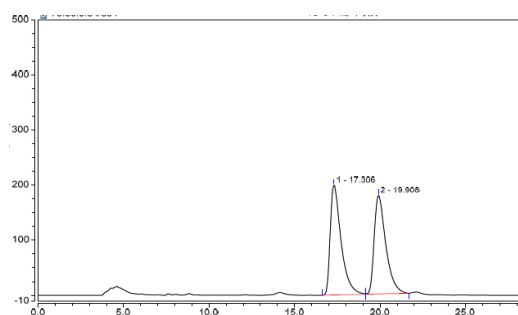

| Peak   | Retention Time<br>min | Area<br>mAU*min | Height<br>mAU | Area<br>% | Height<br>% |
|--------|-----------------------|-----------------|---------------|-----------|-------------|
| 1      | 17.306                | 146.127         | 199.474       | 51.08     | 52.75       |
| 2      | 19.908                | 139.974         | 178.678       | 48.92     | 47.25       |
| Total: |                       | 286.100         | 378.151       | 100.00    | 100.00      |

**3c**

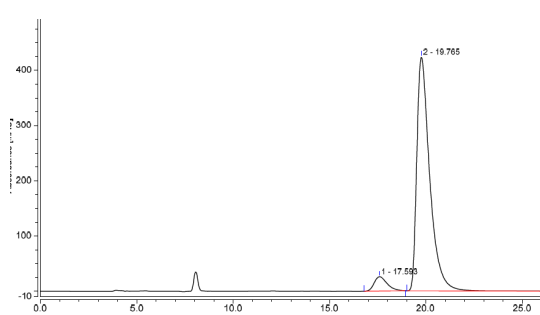

| Peak   | Retention Time<br>min | Area<br>mAU*min | Height<br>mAU | Area<br>% | Height<br>% |
|--------|-----------------------|-----------------|---------------|-----------|-------------|
| 1      | 17.593                | 20.198          | 25.969        | 5.79      | 5.78        |
| 2      | 19.765                | 328.670         | 423.310       | 94.21     | 94.22       |
| Total: |                       | 348.869         | 449.279       | 100.00    | 100.00      |

***tert*-butyl (*tert*-butoxycarbonyl)(9-((2*R*, 3*S*, 4*S*)-4-hydroxy-3-pivaloyltetrahydrothiophen-2-yl)-9*H*-purin-6-yl)carbamate (**3d**)**

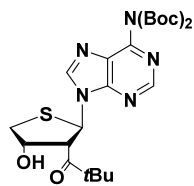

White solid, m.p. 52.5-55.4 °C, 21.1 mg, 81% yield.

$R_f = 0.14$  (Pet/EtOAc, 2/1, v/v).

$[\alpha]_D^{22} = -68.2$  ( $c = 0.22$ ,  $\text{CH}_2\text{Cl}_2$ ).

**HPLC** CHIRALCEL IF, n-hexane/2-propanol = 70/30, flow rate = 0.8 mL/min,  $\lambda = 256$  nm, retention time: 10.440 min (major), 13.827 min (minor), 91% ee, >20:1 dr.

**$^1\text{H}$  NMR** (400 MHz,  $\text{CDCl}_3$ )  $\delta$  8.87 (s, 1H), 8.13 (s, 1H), 6.62 (d,  $J = 8.4$  Hz, 1H), 4.89-4.97 (m, 1H), 4.69 (dd,  $J = 3.6, 8.0$  Hz, 1H), 3.97 (dd,  $J = 3.0, 11.4$  Hz, 1H), 3.27 (dd,  $J = 1.6, 11.6$  Hz, 1H), 2.99 (d,  $J = 6.0$  Hz, 1H), 1.42 (s, 18H), 0.91 (s, 9H).

**$^{13}\text{C}$  NMR** (100 MHz,  $\text{CDCl}_3$ )  $\delta$  213.1, 152.7, 152.2, 151.0, 150.3, 144.3, 130.1, 84.0, 77.0, 64.7, 58.9, 45.2, 43.5, 27.9, 25.5.

**HRMS** (ESI-TOF):  $[\text{M}+\text{Na}]^+$  calcd for  $\text{C}_{24}\text{H}_{35}\text{N}_5\text{NaO}_6\text{S}$  544.2200 found 544.2200.

**Racemic sample of **3d****

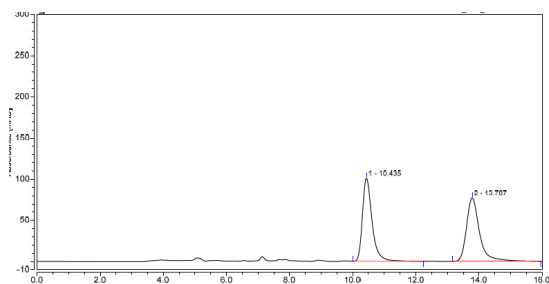

| Peak   | Retention Time<br>min | Area<br>mAU*min | Height<br>mAU | Area<br>% | Height<br>% |
|--------|-----------------------|-----------------|---------------|-----------|-------------|
| 1      | 10.435                | 35.670          | 101.193       | 49.07     | 56.70       |
| 2      | 13.787                | 37.021          | 77.268        | 50.93     | 43.30       |
| Total: |                       | 72.690          | 178.461       | 100.00    | 100.00      |

****3d****

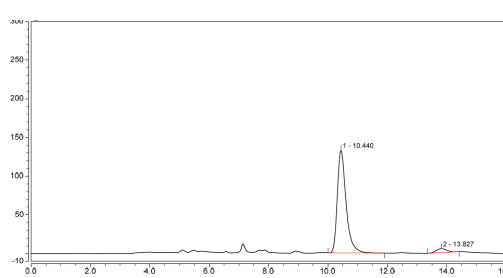

| Peak   | Retention Time<br>min | Area<br>mAU*min | Height<br>mAU | Area<br>% | Height<br>% |
|--------|-----------------------|-----------------|---------------|-----------|-------------|
| 1      | 10.440                | 45.407          | 132.856       | 95.70     | 96.29       |
| 2      | 13.827                | 2.042           | 5.117         | 4.30      | 3.71        |
| Total: |                       | 47.448          | 137.974       | 100.00    | 100.00      |

1-((2*R*, 3*S*, 4*S*)-4-Hydroxy-2-(9*H*-purin-9-yl)tetrahydrothiophen-3-yl)-2,2-dimethylpropan-1-one

(3e)

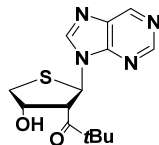

Colorless oil, 21.1 mg, 84% yield.

$R_f = 0.10$  (Pet/EtOAc, 1/1, v/v).

$[\alpha]_D^{22} = -54.0$  ( $c = 0.67$ ,  $\text{CH}_2\text{Cl}_2$ ).

**HPLC** CHIRALCEL IA, n-hexane/2-propanol = 70/30, flow rate = 1.0 mL/min,  $\lambda = 256$  nm, retention time: 10.348 min (major), 14.007 min (minor), 87% ee, >20:1 dr.

**$^1\text{H}$  NMR** (600 MHz,  $\text{CDCl}_3$ )  $\delta$  9.15 (s, 1H), 9.01 (s, 1H), 8.16 (s, 1H), 6.65 (d,  $J = 7.8$  Hz, 1H), 4.92-4.96 (m, 1H), 4.71 (dd,  $J = 3.6, 7.8$  Hz, 1H), 4.00 (dd,  $J = 3.0, 12.0$  Hz, 1H), 3.28 (dd,  $J = 1.2, 11.4$  Hz, 1H), 2.97 (br, 1H), 0.91 (s, 9H).

**$^{13}\text{C}$  NMR** (100 MHz,  $\text{CDCl}_3$ )  $\delta$  213.0, 152.7, 150.9, 149.4, 145.0, 135.3, 77.0, 64.5, 58.9, 45.2, 43.5, 25.6.

**HRMS** (ESI-TOF):  $[\text{M}+\text{Na}]^+$  calcd for  $\text{C}_{14}\text{H}_{18}\text{N}_4\text{NaO}_2\text{S}$  329.1043 found 329.1037.

Racemic sample of 3e

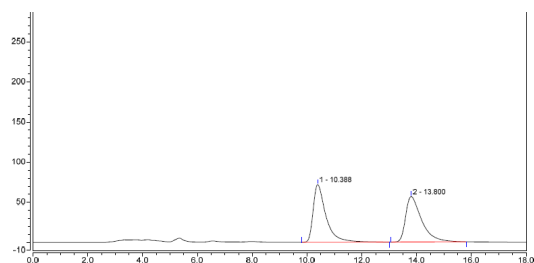

| Peak   | Retention Time<br>min | Area<br>mAU*min | Height<br>mAU | Area<br>% | Height<br>% |
|--------|-----------------------|-----------------|---------------|-----------|-------------|
| 1      | 10.388                | 39.251          | 72.001        | 50.65     | 55.97       |
| 2      | 13.800                | 38.247          | 56.647        | 49.35     | 44.03       |
| Total: |                       | 77.498          | 128.648       | 100.00    | 100.00      |

3e

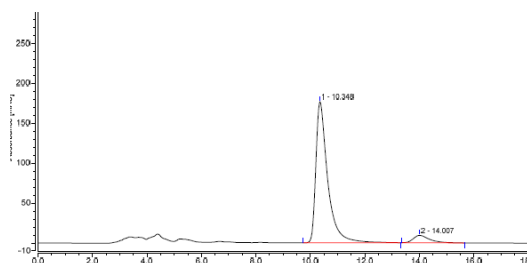

| Peak   | Retention Time<br>min | Area<br>mAU*min | Height<br>mAU | Area<br>% | Height<br>% |
|--------|-----------------------|-----------------|---------------|-----------|-------------|
| 1      | 10.348                | 98.949          | 177.212       | 93.39     | 95.05       |
| 2      | 14.007                | 6.207           | 2.228         | 6.61      | 4.95        |
| Total: |                       | 95.246          | 186.440       | 100.00    | 100.00      |

**1-((2*R*, 3*S*, 4*S*)-4-Hydroxy-2-(6-methoxy-9*H*-purin-9-yl)tetrahydrothiophen-3-yl)-2,2-dimethylpropan-1-one (3f)**

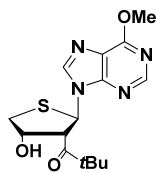

Colorless oil, 15.3 mg, 91% yield.

$R_f = 0.12$  (Pet/EtOAc, 1/1, v/v).

$[\alpha]_D^{22} = -51.2$  ( $c = 1.43$ ,  $\text{CH}_2\text{Cl}_2$ ).

**HPLC** CHIRALCEL IA, n-hexane/2-propanol = 80/20, flow rate = 0.8 mL/min,  $\lambda = 256$  nm, retention time: 13.910 min (major), 17.356 min (minor), 80% ee, >20:1 dr.

**$^1\text{H}$  NMR** (400 MHz,  $\text{CDCl}_3$ )  $\delta$  8.56 (s, 1H), 7.97 (s, 1H), 6.57 (d,  $J = 8.0$  Hz, 1H), 4.86-4.93 (m, 1H), 4.70 (dd,  $J = 3.6, 8.4$  Hz, 1H), 4.18 (s, 3H), 3.98 (dd,  $J = 3.0, 11.4$  Hz, 1H), 3.26 (dd,  $J = 1.2, 11.4$  Hz, 1H), 3.07 (br, 1H), 0.91 (s, 9H).

**$^{13}\text{C}$  NMR** (100 MHz,  $\text{CDCl}_3$ )  $\delta$  213.5, 161.4, 152.4, 151.4, 141.9, 122.9, 77.1, 64.7, 58.7, 54.4, 45.2, 43.5, 25.4.

**HRMS** (ESI-TOF):  $[\text{M}+\text{Na}]^+$  calcd for  $\text{C}_{15}\text{H}_{20}\text{N}_4\text{NaO}_3\text{S}$  359.1148 found 359.1150.

Racemic sample of **3f**

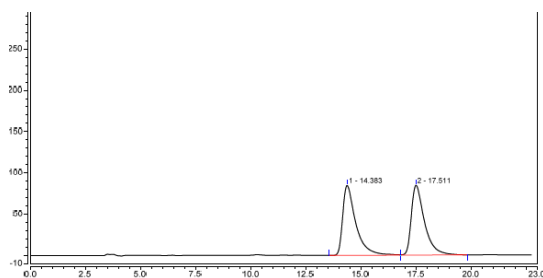

| Peak   | Retention Time<br>min | Area<br>mAU*min | Height<br>mAU | Area<br>% | Height<br>% |
|--------|-----------------------|-----------------|---------------|-----------|-------------|
| 1      | 14.383                | 58.531          | 84.640        | 50.04     | 50.04       |
| 2      | 17.511                | 58.443          | 84.494        | 49.96     | 49.96       |
| Total: |                       | 116.974         | 169.134       | 100.00    | 100.00      |

**3f**

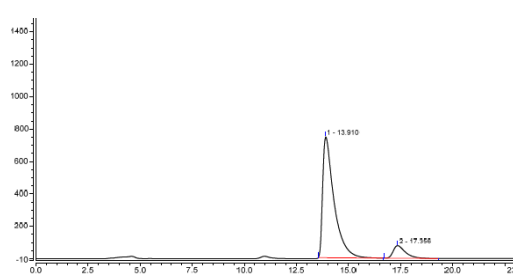

| Peak   | Retention Time<br>min | Area<br>mAU*min | Height<br>mAU | Area<br>% | Height<br>% |
|--------|-----------------------|-----------------|---------------|-----------|-------------|
| 1      | 13.910                | 470.838         | 745.544       | 89.95     | 90.56       |
| 2      | 17.356                | 52.570          | 77.746        | 10.05     | 9.44        |
| Total: |                       | 523.208         | 823.289       | 100.00    | 100.00      |



**1-((2*R*,3*S*,4*S*)-2-(6-Amino-9*H*-purin-9-yl)-4-hydroxytetrahydrothiophen-3-yl)-2,2-dimethylpropan-1-one (3g)**

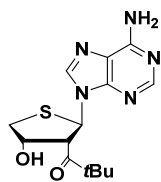

Light yellow oil, 15.1 mg, 94% yield.

$R_f = 0.10$  (EtOAc).

$[\alpha]_D^{24} = -27.6$  ( $c = 0.32$ ,  $\text{CH}_2\text{Cl}_2$ ).

**HPLC** CHIRALCEL IA, n-hexane/2-propanol = 60/40, flow rate = 0.8 mL/min,  $\lambda = 256$  nm, retention time: 14.127 min (minor), 16.215 min (major), 68% ee, >20:1 dr.

**$^1\text{H NMR}$**  (400 MHz,  $\text{CD}_3\text{OD}$ )  $\delta$  8.28 (s, 1H), 8.21 (s, 1H), 6.75 (d,  $J = 9.2$  Hz, 1H), 4.98-5.03 (m, 1H), 4.70 (dd,  $J = 3.6, 8.8$  Hz, 1H), 3.93 (dd,  $J = 3.6, 11.2$  Hz, 1H), 3.09 (dd,  $J = 1.6, 11.2$  Hz, 1H), 0.97 (s, 9H).

**$^{13}\text{C NMR}$**  (100 MHz,  $\text{CD}_3\text{OD}$ )  $\delta$  211.6, 157.4, 153.7, 150.4, 142.3, 76.8, 64.2, 61.0, 45.7, 43.1, 26.0.

**HRMS** (ESI-TOF):  $[\text{M}+\text{Na}]^+$  calcd for  $\text{C}_{14}\text{H}_{19}\text{N}_5\text{NaO}_2\text{S}$  344.1152 found 344.1150.

Racemic sample of **3g**

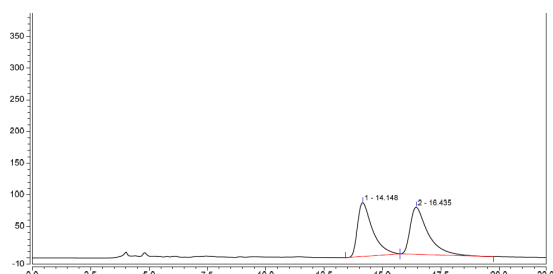

| Peak          | Retention Time<br>min | Area<br>mAU*min | Height<br>mAU  | Area<br>%     | Height<br>%   |
|---------------|-----------------------|-----------------|----------------|---------------|---------------|
| 1             | 14.148                | 63.479          | 85.058         | 49.18         | 53.36         |
| 2             | 16.435                | 85.601          | 74.352         | 50.82         | 46.64         |
| <b>Total:</b> |                       | <b>129.080</b>  | <b>159.410</b> | <b>100.00</b> | <b>100.00</b> |

**3g**

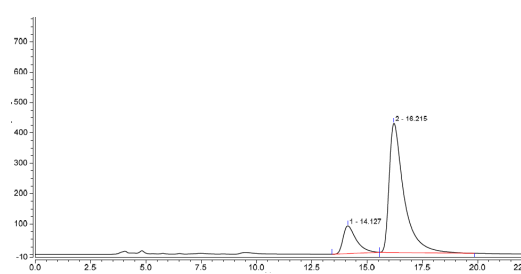

| Peak          | Retention Time<br>min | Area<br>mAU*min | Height<br>mAU  | Area<br>%     | Height<br>%   |
|---------------|-----------------------|-----------------|----------------|---------------|---------------|
| 1             | 14.127                | 63.054          | 91.327         | 15.99         | 17.66         |
| 2             | 16.215                | 331.168         | 425.668        | 84.01         | 82.34         |
| <b>Total:</b> |                       | <b>394.222</b>  | <b>516.996</b> | <b>100.00</b> | <b>100.00</b> |

**1-((2*R*, 3*S*, 4*S*)-2-(6-Chloro-2-fluoro-9*H*-purin-9-yl)-4-hydroxytetrahydrothiophen-3-yl)-2,2-dimethylpropan-1-one (**3h**)**

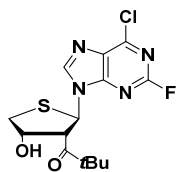

Light yellow oil, 16.1 mg, 90% yield.

$R_f = 0.13$  (Pet/EtOAc, 1/1, v/v).

$[\alpha]_D^{22} = -70.6$  ( $c = 0.74$ ,  $\text{CH}_2\text{Cl}_2$ ).

**HPLC** CHIRALCEL IE, n-hexane/2-propanol = 70/30, flow rate = 0.8 mL/min,  $\lambda = 256$  nm, retention time: 11.898 min (major), 14.018 min (minor), 87% ee, >20:1 dr.

**$^1\text{H NMR}$**  (600 MHz,  $\text{CDCl}_3$ )  $\delta$  8.15 (s, 1H), 6.58 (d,  $J = 7.8$  Hz, 1H), 4.97 (s, 1H), 4.53 (dd,  $J = 3.6, 7.8$  Hz, 1H), 4.18 (s, 3H), 3.97 (dd,  $J = 3.0, 12.0$  Hz, 1H), 3.26 (dd,  $J = 1.8, 12.0$  Hz, 1H), 2.85 (br, 1H), 0.99 (s, 9H).

**$^{13}\text{C NMR}$**  (150 MHz,  $\text{CDCl}_3$ )  $\delta$  212.2, 157.8, 156.3, 153.7 (d,  $J_{\text{C-F}} = 16.5$  Hz), 152.9 (d,  $J_{\text{C-F}} = 16.5$  Hz), 145.5 (d,  $J_{\text{C-F}} = 3.0$  Hz), 131.6 (d,  $J_{\text{C-F}} = 6.0$  Hz), 77.0, 64.9, 59.2, 45.1, 43.7, 25.7.

**$^{19}\text{F NMR}$**  (565 MHz,  $\text{CDCl}_3$ )  $\delta$  -47.9.

**HRMS** (ESI-TOF):  $[\text{M}+\text{Na}]^+$  calcd for  $\text{C}_{14}\text{H}_{16}\text{ClFN}_4\text{NaO}_2\text{S}$  381.0564 found 381.0563.

Racemic sample of **3h**

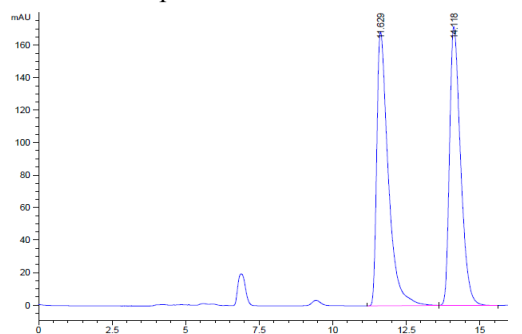

| Peak # | RetTime [min] | Type | Width [min] | Area [mAU*s] | Height [mAU] | Area %  |
|--------|---------------|------|-------------|--------------|--------------|---------|
| 1      | 11.629        | BB   | 0.4060      | 4580.69238   | 168.55084    | 50.6386 |
| 2      | 14.118        | BB   | 0.3985      | 4465.16699   | 171.47868    | 49.3614 |

**3h**

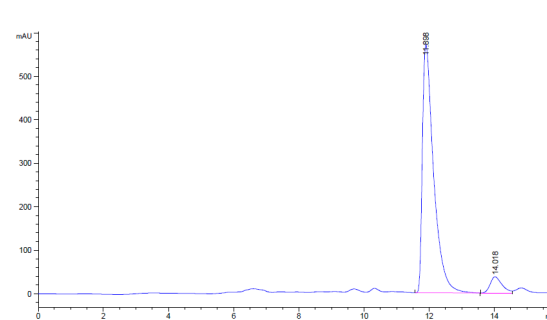

| Peak # | RetTime [min] | Type | Width [min] | Area [mAU*s] | Height [mAU] | Area %  |
|--------|---------------|------|-------------|--------------|--------------|---------|
| 1      | 11.898        | BB   | 0.3564      | 1.36609e4    | 570.90649    | 93.5984 |
| 2      | 14.018        | EV   | 0.3738      | 934.32642    | 37.30988     | 6.4016  |

**1-((2*R*,3*S*,4*S*)-2-(2-Amino-6-chloro-9*H*-purin-9-yl)-4-hydroxytetrahydrothiophen-3-yl)-2,2-dimethylpropan-1-one (**3i**)**

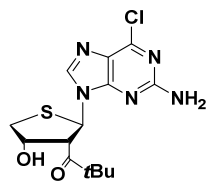

Light yellow oil, 16.2 mg, 91% yield.

$R_f = 0.10$  (Pet/EtOAc, 1/1, v/v).

$[\alpha]_D^{24} = -35.0$  ( $c = 0.44$ ,  $\text{CH}_2\text{Cl}_2$ ).

**HPLC** CHIRALCEL IE, n-hexane/2-propanol = 60/40, flow rate = 0.8 mL/min,  $\lambda = 256$  nm, retention time: 12.930 min (minor), 14.753 min (major), 95% ee, >20:1 dr.

**$^1\text{H NMR}$**  (400 MHz,  $\text{CDCl}_3$ )  $\delta$  7.91 (s, 1H), 6.48 (d,  $J = 8.0$  Hz, 1H), 5.34 (s, 2H), 4.88 (s, 1H), 4.40 (dd,  $J = 3.6, 8.4$  Hz, 1H), 3.84 (dd,  $J = 3.2, 11.6$  Hz, 1H), 3.27 (s, 1H), 3.24 (dd,  $J = 1.6, 11.6$  Hz, 1H), 0.96 (s, 9H).

**$^{13}\text{C NMR}$**  (100 MHz,  $\text{CDCl}_3$ )  $\delta$  213.1, 159.1, 153.3, 151.9, 141.6, 126.0, 76.8, 63.9, 59.0, 45.2, 43.3, 25.5.

**HRMS** (ESI-TOF):  $[\text{M}+\text{Na}]^+$  calcd for  $\text{C}_{14}\text{H}_{18}\text{ClN}_5\text{NaO}_2\text{S}$  378.0762 found 378.0759.

Racemic sample of **3i**

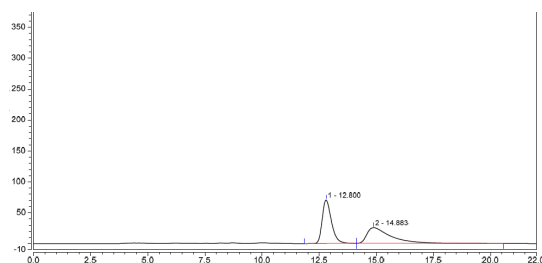

| Peak          | Retention Time<br>min | Area<br>mAU*min | Height<br>mAU | Area<br>%     | Height<br>%   |
|---------------|-----------------------|-----------------|---------------|---------------|---------------|
| 1             | 12.800                | 32.826          | 70.403        | 51.27         | 73.52         |
| 2             | 14.883                | 31.196          | 25.359        | 48.73         | 26.48         |
| <b>Total:</b> |                       | <b>64.022</b>   | <b>95.761</b> | <b>100.00</b> | <b>100.00</b> |

**3i**

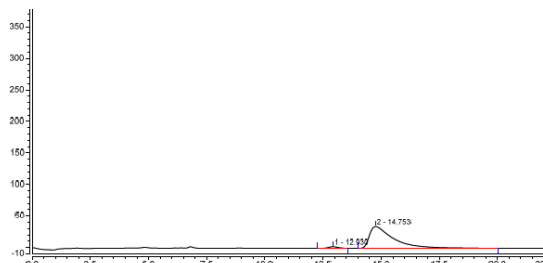

| Peak          | Retention Time<br>min | Area<br>mAU*min | Height<br>mAU | Area<br>%     | Height<br>%   |
|---------------|-----------------------|-----------------|---------------|---------------|---------------|
| 1             | 12.930                | 1.149           | 2.523         | 2.71          | 6.81          |
| 2             | 14.753                | 41.292          | 34.518        | 97.29         | 93.19         |
| <b>Total:</b> |                       | <b>42.441</b>   | <b>37.041</b> | <b>100.00</b> | <b>100.00</b> |

**9-((2*R*,3*S*,4*S*)-4-Hydroxy-3-pivaloyltetrahydrothiophen-2-yl)-1,3-dimethyl-3,9-dihydro-1*H*-purine-2,6-dione (**3j**)**

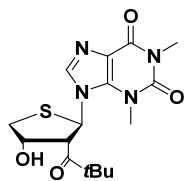

Colorless oil, 15.4 mg, 84% yield.

$R_f = 0.20$  (Pet/EtOAc, 1/1, v/v).

$[\alpha]_D^{24} = -21.5$  ( $c = 0.38$ ,  $\text{CH}_2\text{Cl}_2$ ).

**HPLC** CHIRALCEL IE, n-hexane/2-propanol = 70/30, flow rate = 0.8 mL/min,  $\lambda = 256$  nm, retention time: 31.978 min (major), 46.225 min (minor), 71% ee, >20:1 dr.

**$^1\text{H NMR}$**  (400 MHz,  $\text{CDCl}_3$ )  $\delta$  7.62 (s, 1H), 6.46 (d,  $J = 9.2$  Hz, 1H), 4.90 (dd,  $J = 3.2, 8.8$  Hz, 1H), 4.83-4.88 (m, 1H), 4.08-4.14 (m, 1H), 3.84 (dd,  $J = 3.2, 11.6$  Hz, 1H), 3.57 (s, 3H), 3.45 (s, 3H), 3.14 (dd,  $J = 1.6, 11.2$  Hz, 1H), 2.90 (d,  $J = 4.8$  Hz, 1H), 0.99 (s, 9H).

**$^{13}\text{C NMR}$**  (100 MHz,  $\text{CDCl}_3$ )  $\delta$  213.9, 155.0, 151.5, 151.1, 142.4, 106.4, 77.1, 67.1, 59.2, 45.2, 43.1, 30.1, 28.7, 25.5.

**HRMS** (ESI-TOF):  $[\text{M}+\text{Na}]^+$  calcd for  $\text{C}_{16}\text{H}_{22}\text{N}_4\text{NaO}_4\text{S}$  389.1254 found 389.1250.

Racemic sample of **3j**

**3j**

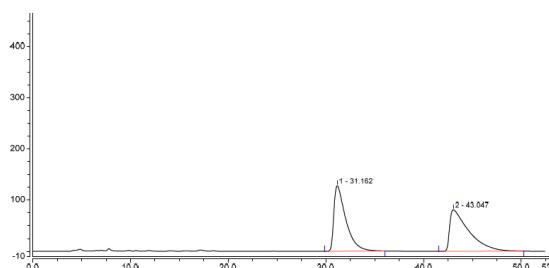

| Peak   | Retention Time<br>min | Area<br>mAU*min | Height<br>mAU | Area<br>% | Height<br>% |
|--------|-----------------------|-----------------|---------------|-----------|-------------|
| 1      | 31.162                | 181.507         | 127.851       | 49.78     | 61.27       |
| 2      | 43.047                | 183.112         | 80.817        | 50.22     | 38.73       |
| Total: |                       | 364.620         | 208.668       | 100.00    | 100.00      |

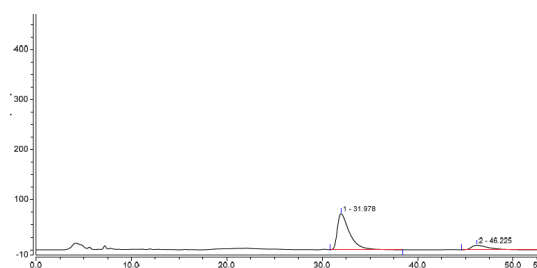

| Peak   | Retention Time<br>min | Area<br>mAU*min | Height<br>mAU | Area<br>% | Height<br>% |
|--------|-----------------------|-----------------|---------------|-----------|-------------|
| 1      | 31.978                | 105.737         | 71.842        | 85.39     | 88.99       |
| 2      | 46.225                | 18.089          | 8.886         | 14.61     | 11.01       |
| Total: |                       | 123.826         | 80.728        | 100.00    | 100.00      |

**1-((2*R*, 3*S*, 4*S*)-2-(4-Chloro-7*H*-pyrrolo[2,3-*d*]pyrimidin-7-yl)-4-hydroxytetrahydrothiophen-3-yl)-2,2-dimethylpropan-1-one (3k)**

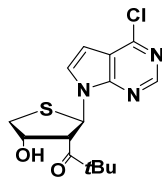

Colorless oil, 17.9 mg, 90% yield.

$R_f = 0.12$  (Pet/EtOAc, 1/1, v/v).

$[\alpha]_D^{22} = -48.6$  ( $c = 0.76$ ,  $\text{CH}_2\text{Cl}_2$ ).

**HPLC** CHIRALCEL IF, n-hexane/2-propanol = 70/30, flow rate = 0.8 mL/min,  $\lambda = 256$  nm, retention time: 14.480 min (major), 16.372 min (minor), 88% ee, >20:1 dr.

**$^1\text{H}$  NMR** (600 MHz,  $\text{CDCl}_3$ )  $\delta$  8.65 (s, 1H), 7.44 (d,  $J = 3.6$  Hz, 1H), 6.75 (d,  $J = 8.4$  Hz, 1H), 6.62 (d,  $J = 3.6$  Hz, 1H), 4.79-4.84 (m, 1H), 4.42 (dd,  $J = 3.6, 8.4$  Hz, 1H), 3.85 (dd,  $J = 3.0, 11.4$  Hz, 1H), 3.26 (dd,  $J = 1.2, 11.7$  Hz, 1H), 3.23 (br, 1H), 0.84 (s, 9H).

**$^{13}\text{C}$  NMR** (150 MHz,  $\text{CDCl}_3$ )  $\delta$  214.2, 152.7, 151.1, 150.9, 128.2, 118.7, 100.9, 65.6, 59.0, 45.3, 43.0, 25.2.

**HRMS** (ESI-TOF):  $[\text{M}+\text{Na}]^+$  calcd for  $\text{C}_{15}\text{H}_{18}\text{ClN}_3\text{NaO}_2\text{S}$  362.0700 found 362.0692.

Racemic sample of **3k**

**3k**

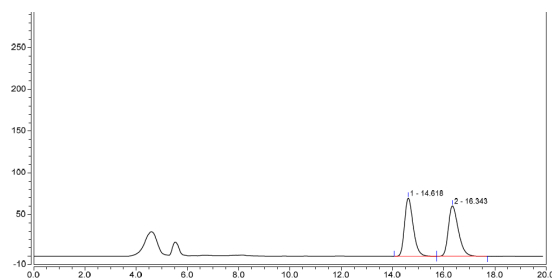

| Peak          | Retention Time<br>min | Area<br>mAU*min | Height<br>mAU  | Area<br>%     | Height<br>%   |
|---------------|-----------------------|-----------------|----------------|---------------|---------------|
| 1             | 14.618                | 27.327          | 69.847         | 49.95         | 53.60         |
| 2             | 16.343                | 27.377          | 60.454         | 50.05         | 46.40         |
| <b>Total:</b> |                       | <b>54.704</b>   | <b>130.300</b> | <b>100.00</b> | <b>100.00</b> |

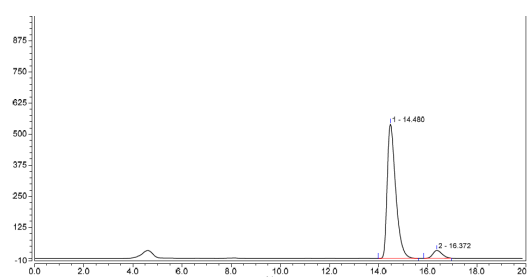

| Peak          | Retention Time<br>min | Area<br>mAU*min | Height<br>mAU  | Area<br>%     | Height<br>%   |
|---------------|-----------------------|-----------------|----------------|---------------|---------------|
| 1             | 14.480                | 215.805         | 540.016        | 94.03         | 94.48         |
| 2             | 16.372                | 13.702          | 31.575         | 5.97          | 5.52          |
| <b>Total:</b> |                       | <b>229.507</b>  | <b>571.591</b> | <b>100.00</b> | <b>100.00</b> |

**1-((2*R*, 3*S*, 4*S*)-2-(6-Chloro-9*H*-purin-9-yl)-4-hydroxytetrahydrothiophen-3-yl)-2,2-dimethylbutan-1-one (31)**

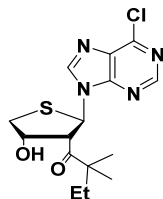

Colorless oil, 16.9 mg, 95% yield.

$R_f = 0.12$  (Pet/EtOAc, 1/1, v/v).

$[\alpha]_D^{22} = -58.4$  ( $c = 0.90$ ,  $\text{CH}_2\text{Cl}_2$ ).

**HPLC** CHIRALCEL IA, n-hexane/2-propanol = 70/30, flow rate = 0.8 mL/min,  $\lambda = 256$  nm, retention time: 10.493 min (major), 12.543 min (minor), 88% ee, >20:1 dr.

**$^1\text{H NMR}$**  (600 MHz,  $\text{CDCl}_3$ )  $\delta$  8.78 (s, 1H), 8.20 (s, 1H), 6.68 (d,  $J = 7.8$  Hz, 1H), 4.95 (s, 1H), 4.69 (dd,  $J = 3.0, 7.8$  Hz, 1H), 3.99 (dd,  $J = 3.0, 11.6$  Hz, 1H), 3.26 (dd,  $J = 1.2, 11.4$  Hz, 1H), 3.10 (br, 1H), 1.24-1.38 (m, 2H), 0.94 (s, 3H), 0.85 (s, 1H), 0.47 (q,  $J = 7.2$  Hz, 1H).

**$^{13}\text{C NMR}$**  (150 MHz,  $\text{CDCl}_3$ )  $\delta$  212.8, 152.1, 151.8, 151.2, 145.0, 132.9, 64.9, 59.0, 48.9, 43.6, 31.6, 23.2, 22.6, 8.6.

**HRMS** (ESI-TOF):  $[\text{M}+\text{Na}]^+$  calcd for  $\text{C}_{15}\text{H}_{19}\text{ClN}_4\text{NaO}_2\text{S}$  377.0809 found 377.0809.

Racemic sample of **31**

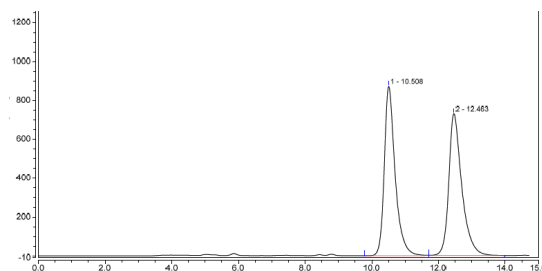

| Peak   | Retention Time<br>min | Area<br>mAU*min | Height<br>mAU | Area<br>% | Height<br>% |
|--------|-----------------------|-----------------|---------------|-----------|-------------|
| 1      | 10.508                | 328.796         | 872.436       | 49.83     | 54.41       |
| 2      | 12.463                | 331.041         | 731.128       | 50.17     | 45.59       |
| Total: |                       | 659.836         | 1603.564      | 100.00    | 100.00      |

**31**

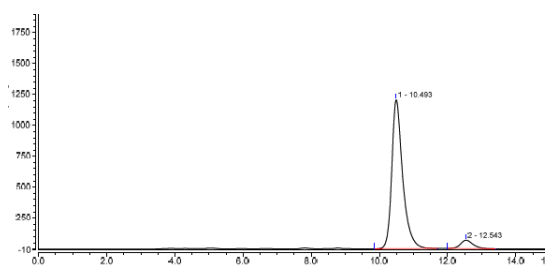

| Peak   | Retention Time<br>min | Area<br>mAU*min | Height<br>mAU | Area<br>% | Height<br>% |
|--------|-----------------------|-----------------|---------------|-----------|-------------|
| 1      | 10.493                | 446.521         | 1205.413      | 94.02     | 94.71       |
| 2      | 12.543                | 28.412          | 87.303        | 5.98      | 5.29        |
| Total: |                       | 474.933         | 1272.716      | 100.00    | 100.00      |

**1-((2*R*, 3*S*, 4*S*)-2-(6-Chloro-9*H*-purin-9-yl)-4-hydroxytetrahydrothiophen-3-yl)-2,2-dimethylpentan-1-one (3m)**

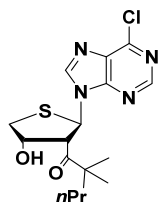

Colorless oil, 15.9 mg, 86% yield.

$R_f = 0.13$  (Pet/EtOAc, 1/1, v/v).

$[\alpha]_D^{22} = -85.3$  ( $c = 0.63$ ,  $\text{CH}_2\text{Cl}_2$ ).

**HPLC** CHIRALCEL IF, n-hexane/2-propanol = 70/30, flow rate = 0.8 mL/min,  $\lambda = 256$  nm, retention time: 15.738 min (major), 21.033 min (minor), 88% ee, >20:1 dr.

**$^1\text{H NMR}$**  (600 MHz,  $\text{CDCl}_3$ )  $\delta$  8.79 (s, 1H), 8.17 (s, 1H), 6.62 (d,  $J = 8.4$  Hz, 1H), 4.90-4.94 (m, 1H), 4.70 (dd,  $J = 3.6, 8.4$  Hz, 1H), 4.00 (dd,  $J = 3.0, 12.0$  Hz, 1H), 3.27 (dd,  $J = 1.2, 11.4$  Hz, 1H), 2.95 (d,  $J = 6.0$  Hz, 1H), 1.21-1.27 (m, 1H), 1.13-1.19 (m, 1H), 0.98 (s, 3H), 0.93-0.96 (m, 1H), 0.87 (s, 3H), 0.57-0.64 (m, 1H), 0.53 (t,  $J = 7.2$  Hz, 3H).

**$^{13}\text{C NMR}$**  (150 MHz,  $\text{CDCl}_3$ )  $\delta$  212.8, 152.1, 151.9, 151.2, 145.0, 133.0, 77.0, 64.9, 58.8, 48.8, 43.6, 41.4, 23.8, 23.1, 17.8, 14.3.

**HRMS** (ESI-TOF):  $[\text{M}+\text{Na}]^+$  calcd for  $\text{C}_{16}\text{H}_{21}\text{ClN}_4\text{NaO}_2\text{S}$  391.0966 found 391.0964.

Racemic sample of **3m**

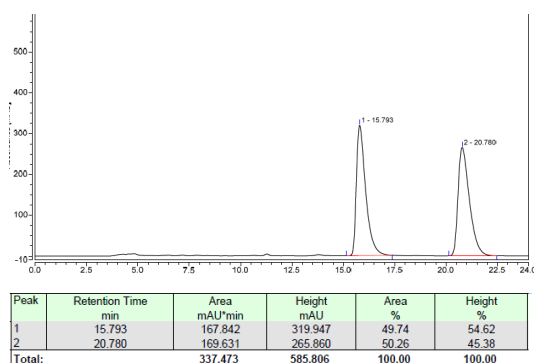

**3m**

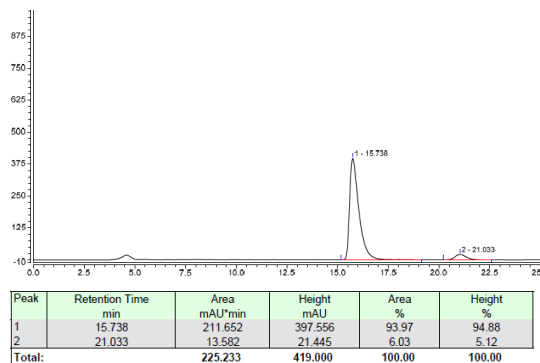

**1-((2*R*, 3*S*, 4*S*)-2-(6-Chloro-9*H*-purin-9-yl)-4-hydroxytetrahydrothiophen-3-yl)-2,2-dimethylhexan-1-one (3n)**

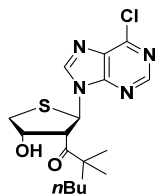

Colorless oil, 17.6 mg, 92% yield.

$R_f = 0.18$  (Pet/EtOAc, 1/1, v/v).

$[\alpha]_D^{22} = -35.8$  ( $c = 0.54$ ,  $\text{CH}_2\text{Cl}_2$ )

**HPLC** CHIRALCEL IE, n-hexane/2-propanol = 70/30, flow rate = 0.8 mL/min,  $\lambda = 256$  nm, retention time: 14.435 min (major), 18.947 min (minor), 88% ee, >20:1 dr.

**$^1\text{H}$  NMR** (600 MHz,  $\text{CDCl}_3$ )  $\delta$  8.79 (s, 1H), 8.17 (s, 1H), 6.67 (d,  $J = 8.4$ , 1H), 4.94 (s, 1H), 4.72 (dd,  $J = 3.6, 8.4$  Hz, 1H), 4.00 (dd,  $J = 3.0, 11.4$  Hz, 1H), 3.26 (dd,  $J = 1.2, 11.4$  Hz, 1H), 2.95 (d,  $J = 4.8$  Hz, 1H), 1.22-1.28 (m, 2H), 1.14-1.20 (m, 1H), 1.00 (s, 3H), 0.90-0.97 (m, 1H), 0.88 (s, 3H), 0.71-0.80 (m, 1H), 0.63 (t,  $J = 7.2$  Hz, 1H), 0.45-0.53 (m, 1H).

**$^{13}\text{C}$  NMR** (150 MHz,  $\text{CDCl}_3$ )  $\delta$  212.8, 152.1, 151.9, 151.2, 145.0, 133.0, 77.0, 64.9, 58.9, 48.6, 43.6, 39.1, 29.8, 26.6, 24.0, 23.1, 23.1, 13.8.

**HRMS** (ESI-TOF):  $[\text{M}+\text{H}]^+$  calcd for  $\text{C}_{17}\text{H}_{24}\text{ClN}_4\text{O}_2\text{S}$  383.1303 found 383.1304.

Racemic sample of **3n**

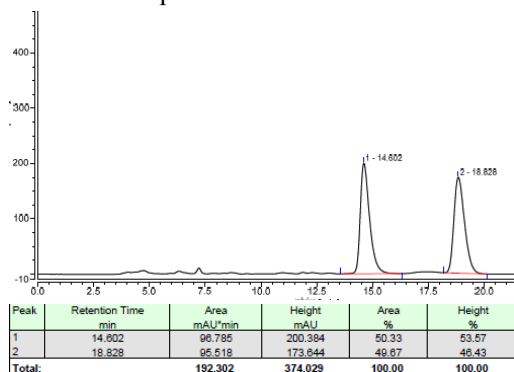

**3n**

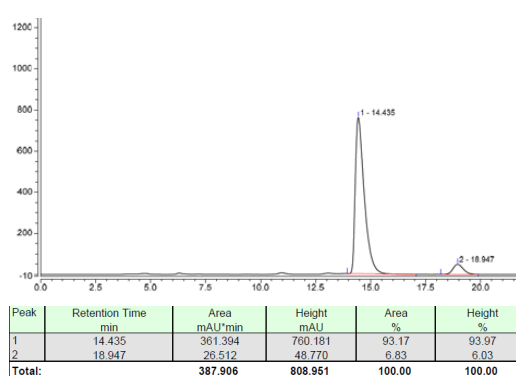



**1-((2*R*, 3*S*, 4*S*)-2-(6-Chloro-9*H*-purin-9-yl)-4-hydroxytetrahydrothiophen-3-yl)-2,2-dimethylpent-4-en-1-one (3o)**

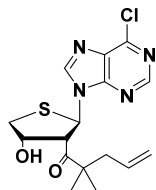

Colorless oil, 17.8 mg, 97% yield.

$R_f = 0.3$  (Pet/EtOAc, 5/1, v/v).

$[\alpha]_D^{22} = -73.8$  ( $c = 0.69$ ,  $\text{CH}_2\text{Cl}_2$ ).

**HPLC** CHIRALCEL IE, n-hexane/2-propanol = 70/30, flow rate = 0.8 mL/min,  $\lambda = 256$  nm, retention time: 16.237 min (major), 21.788 min (minor), 90% ee, >20:1 dr.

**$^1\text{H NMR}$**  (600 MHz,  $\text{CDCl}_3$ )  $\delta$  8.78 (s, 1H), 8.17 (s, 1H), 6.68 (d,  $J = 7.8$  Hz, 1H), 5.31-5.40 (m, 1H), 5.00 (s, 1H), 4.68-4.78 (m, 2H), 4.65 (dd,  $J = 3.6, 7.8$  Hz, 1H), 4.02 (dd,  $J = 3.0, 11.4$  Hz, 1H), 3.25 (dd,  $J = 1.2, 11.4$  Hz, 1H), 2.90 (d,  $J = 6.6$  Hz, 1H), 2.03-2.14 (m, 2H), 0.97 (s, 3H), 0.95 (s, 3H).

**$^{13}\text{C NMR}$**  (150 MHz,  $\text{CDCl}_3$ )  $\delta$  211.9, 152.1, 151.9, 151.2, 145.0, 133.0, 132.8, 118.6, 76.9, 64.6, 59.8, 48.3, 43.7, 43.5, 23.6, 23.5.

**HRMS** (ESI-TOF):  $[\text{M}+\text{Na}]^+$  calcd for  $\text{C}_{16}\text{H}_{19}\text{ClN}_4\text{NaO}_2\text{S}$  389.0809 found 389.0804.

**Racemic sample of 3o**

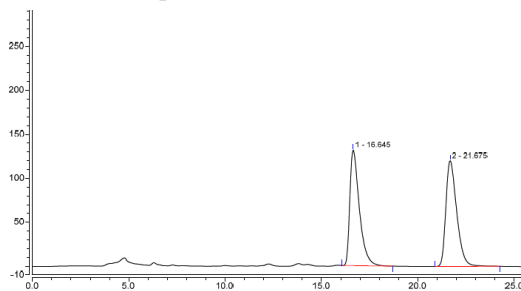

| Peak   | Retention Time<br>min | Area<br>mAU*min | Height<br>mAU | Area<br>% | Height<br>% |
|--------|-----------------------|-----------------|---------------|-----------|-------------|
| 1      | 16.645                | 75.522          | 131.605       | 49.05     | 52.23       |
| 2      | 21.675                | 78.434          | 120.365       | 50.95     | 47.77       |
| Total: |                       | 153.957         | 251.970       | 100.00    | 100.00      |

**3o**

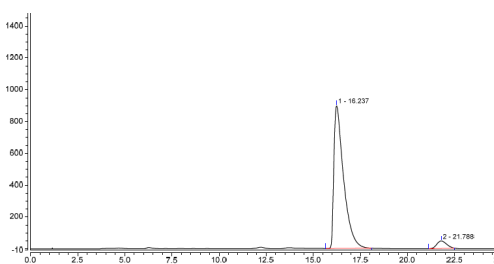

| Peak   | Retention Time<br>min | Area<br>mAU*min | Height<br>mAU | Area<br>% | Height<br>% |
|--------|-----------------------|-----------------|---------------|-----------|-------------|
| 1      | 16.237                | 536.217         | 897.847       | 95.03     | 95.01       |
| 2      | 21.788                | 28.065          | 47.131        | 4.97      | 4.99        |
| Total: |                       | 564.282         | 944.978       | 100.00    | 100.00      |

# 1-((2*R*, 3*S*, 4*S*)-2-(6-Chloro-9*H*-purin-9-yl)-4-hydroxytetrahydrothiophen-3-yl)-2,2-diethylbutan-

## 1-one (3p)

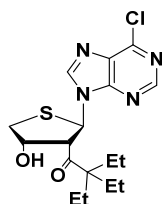

White solid, m.p. 125.1-128.6 °C, 16.3 mg, 85% yield.

$R_f = 0.32$  (Pet/EtOAc, 10/1, v/v).

$[\alpha]_D^{22} = -42.6$  ( $c = 0.52$ ,  $\text{CH}_2\text{Cl}_2$ ).

**HPLC** CHIRALCEL IE, n-hexane/2-propanol = 70/30, flow rate = 0.8 mL/min,  $\lambda = 256$  nm, retention time: 18.068 min (major), 21.178 min (minor), 88% ee, >20:1 dr.

**$^1\text{H}$  NMR** (600 MHz,  $\text{CDCl}_3$ )  $\delta$  8.80 (s, 1H), 8.12 (s, 1H), 6.65 (d,  $J = 7.8$  Hz, 1H), 4.88-4.92 (m, 2H), 4.02 (dd,  $J = 3.0, 11.4$  Hz, 1H), 3.25 (dd,  $J = 1.2, 11.4$  Hz, 1H), 2.93 (br, 1), 1.42-1.50 (m, 3H), 1.30-1.37 (m, 3H), 0.43 (t,  $J = 7.8$  Hz, 9H).

**$^{13}\text{C}$  NMR** (150 MHz,  $\text{CDCl}_3$ )  $\delta$  213.5, 152.1, 151.9, 151.2, 145.1, 133.0, 77.1, 65.3, 58.1, 56.2, 43.8, 24.7, 7.8.

**HRMS** (ESI-TOF):  $[\text{M}+\text{Na}]^+$  calcd for  $\text{C}_{17}\text{H}_{23}\text{ClN}_4\text{NaO}_2\text{S}$  405.1122 found 405.1120.

### Racemic sample of 3p

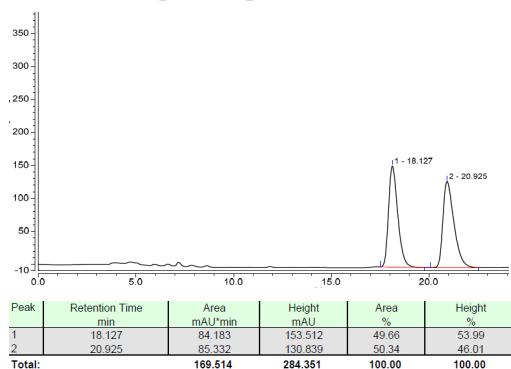

### 3p

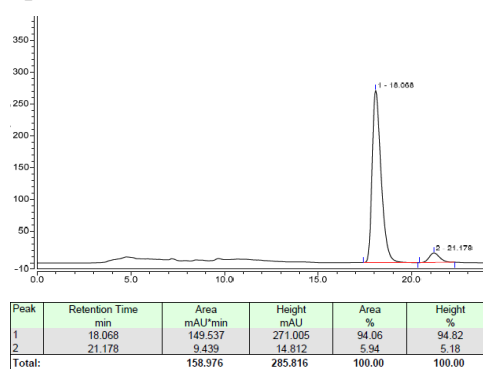

**((2*R*, 3*S*, 4*S*)-2-(6-Chloro-9*H*-purin-9-yl)-4-hydroxytetrahydrothiophen-3-yl)(1-methylcyclohexyl) methanone (3q)**

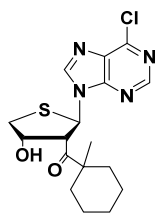

Colorless oil, 16.6 mg, 87% yield.

$R_f = 0.18$  (Pet/EtOAc, 2/1, v/v).

$[\alpha]_D^{22} = -82.7$  ( $c = 0.57$ ,  $\text{CH}_2\text{Cl}_2$ ).

**HPLC** CHIRALCEL IE, n-hexane/2-propanol = 70/30, flow rate = 0.8 mL/min,  $\lambda = 256$  nm, retention time: 20.653 min (major), 29.555 min (minor), 91% ee, >20:1 dr.

**$^1\text{H}$  NMR** (600 MHz,  $\text{CDCl}_3$ )  $\delta$  8.78 (s, 1H), 8.18 (s, 1H), 6.65 (d,  $J = 8.4$  Hz, 1H), 4.90-4.94 (m, 1H), 4.68 (dd,  $J = 3.6, 8.4$  Hz, 1H), 3.99 (dd,  $J = 3.0, 11.4$  Hz, 1H), 3.27 (dd,  $J = 1.2, 11.4$  Hz, 1H), 3.01 (d,  $J = 6.0$  Hz, 1H), 1.72-1.79 (m, 1H), 1.52-1.58 (m, 1H), 1.42-1.50 (m, 1H), 1.23-1.29 (m, 5H), 1.10-1.15 (m, 1H), 0.91-1.01 (m, 1H), 0.74 (s, 3H).

**$^{13}\text{C}$  NMR** (100 MHz,  $\text{CDCl}_3$ )  $\delta$  213.1, 152.1, 151.9, 151.2, 144.9, 132.9, 77.1, 65.1, 58.7, 49.0, 43.7, 34.0, 33.7, 25.6, 22.6, 22.3.

**HRMS** (ESI-TOF):  $[\text{M}+\text{Na}]^+$  calcd for  $\text{C}_{17}\text{H}_{21}\text{ClN}_4\text{NaO}_2\text{S}$  403.0966 found 403.0959.

Racemic sample of **3q**

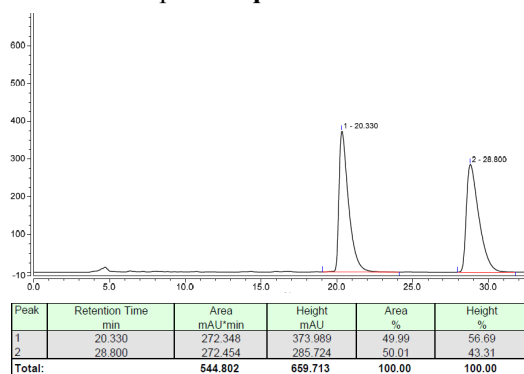

**3q**

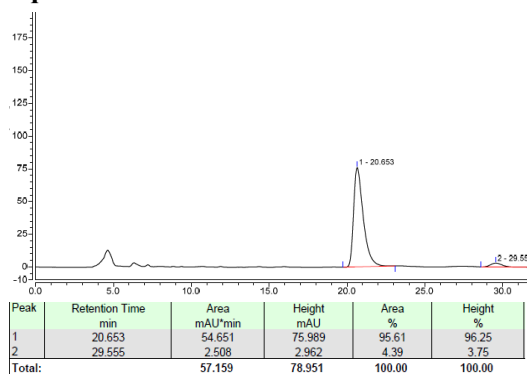

**((2*R*, 3*S*, 4*S*)-2-(6-Chloro-9*H*-purin-9-yl)-4-hydroxytetrahydrothiophen-3-yl)(1-methylcyclopentyl)methanone (**3r**)**

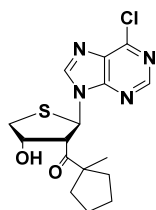

Colorless oil, 15.6 mg, 85% yield.

$R_f = 0.21$  (Pet/EtOAc, 1/1, v/v).

$[\alpha]_D^{22} = -66.4$  ( $c = 0.59$ ,  $\text{CH}_2\text{Cl}_2$ ).

**HPLC** CHIRALCEL IE, n-hexane/2-propanol = 70/30, flow rate = 0.8 mL/min,  $\lambda = 256$  nm, retention time: 20.998 min (major), 28.325 min (minor), 87% ee, >20:1 dr.

**$^1\text{H}$  NMR** (600 MHz,  $\text{CDCl}_3$ )  $\delta$  8.77 (s, 1H), 8.23 (s, 1H), 6.67 (d,  $J = 8.4$  Hz, 1H), 4.96 (s, 1H), 4.57 (dd,  $J = 3.6, 7.8$  Hz, 1H), 3.97 (dd,  $J = 3.0, 12.0$  Hz, 1H), 3.27 (dd,  $J = 1.8, 12.0$  Hz, 1H), 3.13 (br, 1H), 1.76-1.82 (m, 1H), 1.44-1.63 (m, 4H), 1.34-1.42 (m, 1H), 1.19-1.29 (m, 2H), 0.97 (s, 3H).

**$^{13}\text{C}$  NMR** (150 MHz,  $\text{CDCl}_3$ )  $\delta$  211.8, 152.1, 151.8, 151.2, 145.0, 132.9, 64.7, 60.0, 56.5, 43.5, 35.8, 35.7, 24.8, 24.6, 23.3.

**HRMS** (ESI-TOF):  $[\text{M}+\text{H}]^+$  calcd for  $\text{C}_{16}\text{H}_{20}\text{ClN}_4\text{O}_2\text{S}$  367.0990 found 367.0989.

Racemic sample of **3r**

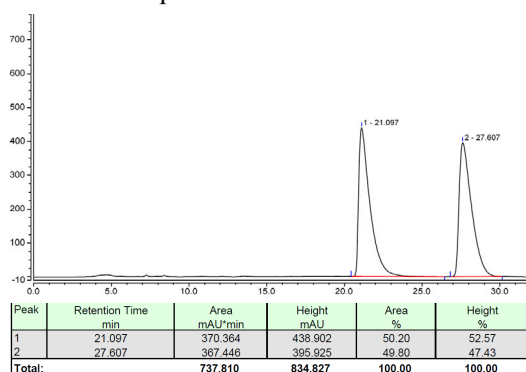

**3r**

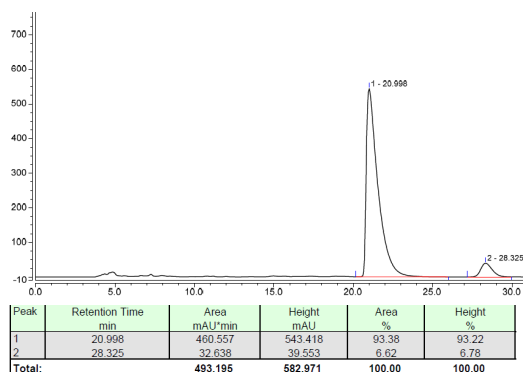

**((3*S*, 5*S*, 7*S*)-Adamantan-1-yl)((2*R*,3*S*,4*S*)-2-(6-chloro-9*H*-purin-9-yl)-4-hydroxytetrahydrothiophen-3-yl)methanone (3s)**

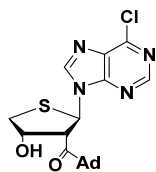

Colorless oil, 19.1mg, 91% yield.

$R_f = 0.19$  (Pet/EtOAc, 1/1, v/v).

$[\alpha]_D^{22} = -45.3$  ( $c = 1.1$ ,  $\text{CH}_2\text{Cl}_2$ ).

**HPLC** CHIRALCEL IE, n-hexane/2-propanol = 70/30, flow rate = 0.8 mL/min,  $\lambda = 256$  nm, retention time: 27.793 min (minor), 29.548 min (major), 92% ee, >20:1 dr.

**$^1\text{H NMR}$**  (600 MHz,  $\text{CDCl}_3$ )  $\delta$  8.78 (s, 1H), 8.23 (s, 1H), 6.68 (d,  $J = 8.4$  Hz, 1H), 4.92-4.97 (m, 1H), 4.62 (dd,  $J = 3.6, 7.8$  Hz, 1H), 3.98 (dd,  $J = 3.6, 12.0$  Hz, 1H), 3.26 (dd,  $J = 1.2, 11.4$  Hz, 1H), 3.03 (br, 1H), 1.88-1.95 (m, 3H), 1.60-1.70 (m, 3H), 1.46-1.57 (m, 9H), 1.19-1.29 (m, 2H), 0.97 (s, 3H).

**$^{13}\text{C NMR}$**  (150 MHz,  $\text{CDCl}_3$ )  $\delta$  212.0, 152.1, 151.8, 151.2, 144.98, 144.96, 132.9, 76.9, 64.6, 58.7, 47.3, 43.6, 37.2, 36.2, 27.5.

**HRMS** (ESI-TOF):  $[\text{M}+\text{Na}]^+$  calcd for  $\text{C}_{20}\text{H}_{24}\text{ClN}_4\text{NaO}_2\text{S}$  419.1303 found 419.1299.

Racemic sample of **3s**

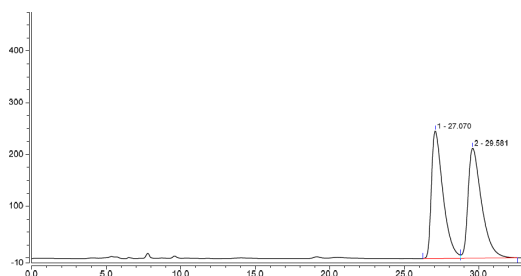

| Peak          | Retention Time<br>min | Area<br>mAU*min | Height<br>mAU  | Area<br>%     | Height<br>%   |
|---------------|-----------------------|-----------------|----------------|---------------|---------------|
| 1             | 27.070                | 220.774         | 246.201        | 49.70         | 53.67         |
| 2             | 29.581                | 223.478         | 212.557        | 50.30         | 46.33         |
| <b>Total:</b> |                       | <b>444.253</b>  | <b>458.758</b> | <b>100.00</b> | <b>100.00</b> |

**3s**

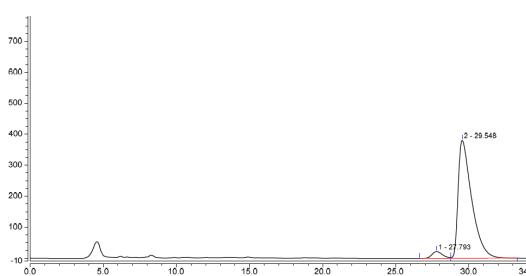

| Peak          | Retention Time<br>min | Area<br>mAU*min | Height<br>mAU  | Area<br>%     | Height<br>%   |
|---------------|-----------------------|-----------------|----------------|---------------|---------------|
| 1             | 27.793                | 18.037          | 21.759         | 4.24          | 5.40          |
| 2             | 29.548                | 407.133         | 380.818        | 95.76         | 94.60         |
| <b>Total:</b> |                       | <b>425.171</b>  | <b>402.577</b> | <b>100.00</b> | <b>100.00</b> |

**1-((2*R*, 3*S*, 4*S*)-2-(1*H*-Benzo[d]imidazol-1-yl)-4-hydroxytetrahydrothiophen-3-yl)-2,2-dimethylpropan-1-one (**3t**)**

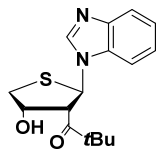

White solid, m.p. 161.0-164.8 °C, 12.8 mg, 84% yield.

$R_f = 0.08$  (Pet/EtOAc, 1/1, v/v).

$[\alpha]_D^{22} = -2.7$  ( $c = 0.78$ ,  $\text{CH}_2\text{Cl}_2$ ).

**HPLC** CHIRALCEL ID, n-hexane/2-propanol = 70/30, flow rate = 0.8 mL/min,  $\lambda = 256$  nm, retention time: 13.078 min (major), 17.572 min (minor), 95% ee, >20:1 dr.

**$^1\text{H NMR}$**  (600 MHz,  $\text{CDCl}_3$ )  $\delta$  8.14 (s, 1H), 7.75-7.79 (m, 1H), 7.46-7.50 (m, 1H), 7.26-7.32 (m, 2H), 6.63 (d,  $J = 9.0$  Hz, 1H), 4.75-4.78 (m, 1H), 4.04 (dd,  $J = 3.0, 9.6$  Hz, 1H), 3.75 (dd,  $J = 3.0, 12.6$  Hz, 1H), 3.31 (dd,  $J = 1.8, 12.0$  Hz, 1H), 0.75 (s, 9H).

**$^{13}\text{C NMR}$**  (100 MHz,  $\text{CDCl}_3$ )  $\delta$  214.7, 144.4, 142.1, 132.7, 123.6, 123.0, 121.0, 111.0, 76.2, 65.1, 59.8, 45.4, 42.2, 24.9.

**HRMS** (ESI-TOF):  $[\text{M}+\text{H}]^+$  calcd for  $\text{C}_{16}\text{H}_{21}\text{N}_2\text{O}_2\text{S}$  305.1318 found 305.1318.

Racemic sample of **3t**

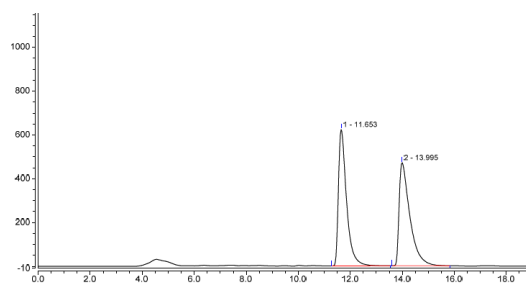

| Peak   | Retention Time<br>min | Area<br>mAU*min | Height<br>mAU | Area<br>% | Height<br>% |
|--------|-----------------------|-----------------|---------------|-----------|-------------|
| 1      | 11.653                | 226.140         | 623.681       | 50.15     | 56.95       |
| 2      | 13.995                | 224.781         | 471.445       | 49.85     | 43.05       |
| Total: |                       | 450.921         | 1095.126      | 100.00    | 100.00      |

**3t**

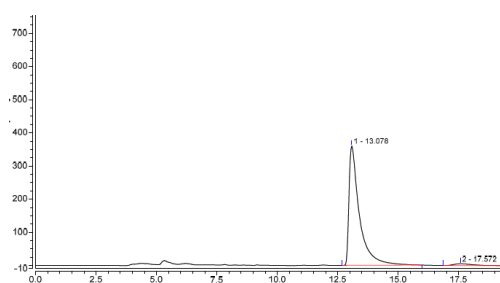

| Peak   | Retention Time<br>min | Area<br>mAU*min | Height<br>mAU | Area<br>% | Height<br>% |
|--------|-----------------------|-----------------|---------------|-----------|-------------|
| 1      | 13.078                | 180.669         | 360.388       | 97.32     | 98.56       |
| 2      | 17.572                | 4.973           | 5.262         | 2.68      | 1.44        |
| Total: |                       | 185.643         | 365.650       | 100.00    | 100.00      |

**1-((2*R*, 3*S*, 4*S*)-2-(2-Chloro-1*H*-benzo[d]imidazol-1-yl)-4-hydroxytetrahydrothiophen-3-yl)-2,2-dimethylpropan-1-one (**3u**)**

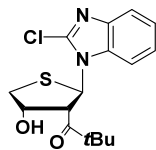

Colorless oil, 14.6 mg, 86% yield.

$R_f = 0.24$  (Pet/EtOAc, 2/1, v/v).

$[\alpha]_D^{22} = -22.8$  ( $c = 0.96$ ,  $\text{CH}_2\text{Cl}_2$ ).

**HPLC** CHIRALCEL ID, n-hexane/2-propanol = 70/30, flow rate = 0.8 mL/min,  $\lambda = 256$  nm, retention time: 7.493 min (major), 8.555 min (minor), 95% ee, >20:1 dr.

**$^1\text{H NMR}$**  (400 MHz,  $\text{CDCl}_3$ )  $\delta$  7.67-7.71 (m, 1H), 7.59-7.64 (m, 1H), 7.27-7.37 (m, 2H), 6.82 (d,  $J = 9.6$  Hz, 1H), 4.72-4.78 (m, 1H), 4.32 (dd,  $J = 3.2, 9.6$  Hz, 1H), 3.75 (dd,  $J = 3.2, 11.6$  Hz, 1H), 3.42 (br, 1H), 3.35 (dd,  $J = 1.2, 11.6$  Hz, 1H), 0.80 (s, 9H).

**$^{13}\text{C NMR}$**  (150 MHz,  $\text{CDCl}_3$ )  $\delta$  214.6, 142.2, 140.2, 123.7, 123.5, 120.4, 111.2, 76.4, 65.1, 56.2, 45.5, 42.9, 24.9, 18.6.

**HRMS** (ESI-TOF):  $[\text{M}+\text{Na}]^+$  calcd for  $\text{C}_{16}\text{H}_{19}\text{ClN}_2\text{NaO}_2\text{S}$  361.0748 found 361.0745.

Racemic sample of **3u**

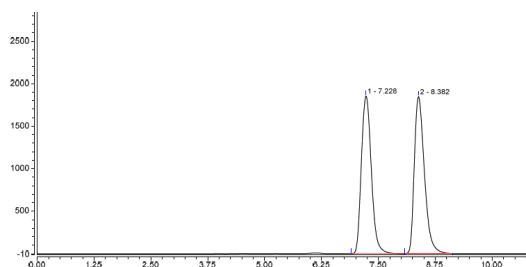

| Peak   | Retention Time<br>min | Area<br>mAU*min | Height<br>mAU | Area<br>% | Height<br>% |
|--------|-----------------------|-----------------|---------------|-----------|-------------|
| 1      | 7.228                 | 472.128         | 1855.654      | 50.01     | 50.11       |
| 2      | 8.382                 | 471.962         | 1847.184      | 49.99     | 49.89       |
| Total: |                       | 944.110         | 3702.838      | 100.00    | 100.00      |

**3u**

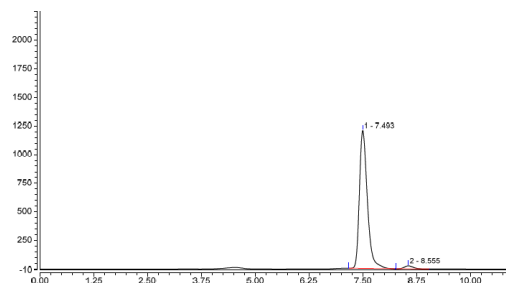

| Peak   | Retention Time<br>min | Area<br>mAU*min | Height<br>mAU | Area<br>% | Height<br>% |
|--------|-----------------------|-----------------|---------------|-----------|-------------|
| 1      | 7.493                 | 256.928         | 1204.757      | 97.62     | 97.89       |
| 2      | 8.555                 | 6.271           | 25.969        | 2.38      | 2.11        |
| Total: |                       | 263.199         | 1230.725      | 100.00    | 100.00      |

**1-((2*R*, 3*S*, 4*S*)-2-(2-Bromo-1*H*-benzo[d]imidazol-1-yl)-4-hydroxytetrahydrothiophen-3-yl)-2,2-dimethylpropan-1-one (**3v**)**

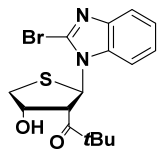

Colorless oil, 16.6 mg, 87% yield.

$R_f = 0.27$  (Pet/EtOAc, 2/1, v/v).

$[\alpha]_D^{22} = -24.2$  ( $c = 0.76$ ,  $\text{CH}_2\text{Cl}_2$ ).

HPLC CHIRALCELID-H, n-hexane/2-propanol = 70/30, flow rate = 0.8 mL/min,  $\lambda = 256$  nm, retention time: 8.417 min (major), 9.680 min (minor), 94% ee, >20:1 dr.

$^1\text{H NMR}$  (600 MHz,  $\text{CDCl}_3$ )  $\delta$  7.71 (d,  $J = 7.2$  Hz, 1H), 7.65 (s, 1H), 7.27-7.35 (m, 2H), 7.26-7.32 (m, 2H), 6.83 (d,  $J = 9.6$  Hz, 1H), 4.76 (s, 1H), 4.34 (d,  $J = 7.2$  Hz, 1H), 3.75 (dd,  $J = 3.0, 12.0$  Hz, 1H), 3.50 (br, 1H), 3.36 (d,  $J = 12.0$  Hz, 1H), 0.78 (s, 9H).

$^{13}\text{C NMR}$  (150 MHz,  $\text{CDCl}_3$ )  $\delta$  214.6, 171.3, 143.9, 123.6, 123.4, 120.4, 111.2, 76.4, 66.3, 60.5, 56.0, 45.5, 42.9, 24.8, 21.2, 14.3.

HRMS (ESI-TOF):  $[\text{M}+\text{Na}]^+$  calcd for  $\text{C}_{16}\text{H}_{19}\text{BrN}_2\text{NaO}_2\text{S}$  405.0243 found 405.0245.

Racemic sample of **3v**

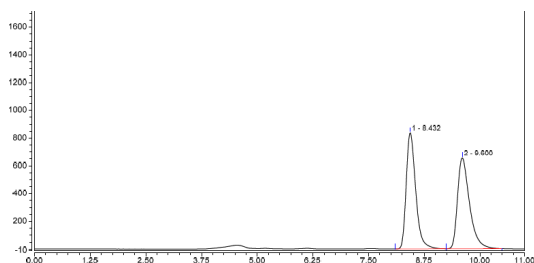

| Peak   | Retention Time<br>min | Area<br>mAU*min | Height<br>mAU | Area<br>% | Height<br>% |
|--------|-----------------------|-----------------|---------------|-----------|-------------|
| 1      | 8.432                 | 206.212         | 838.179       | 50.19     | 56.09       |
| 2      | 9.600                 | 204.662         | 656.254       | 49.81     | 43.91       |
| Total: |                       | 410.874         | 1494.433      | 100.00    | 100.00      |

**3v**

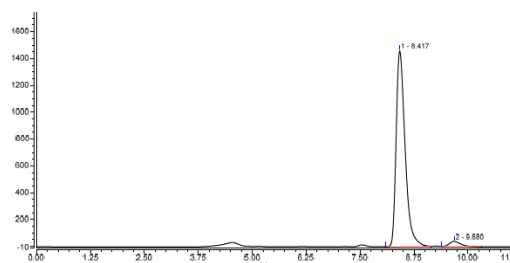

| Peak   | Retention Time<br>min | Area<br>mAU*min | Height<br>mAU | Area<br>% | Height<br>% |
|--------|-----------------------|-----------------|---------------|-----------|-------------|
| 1      | 8.417                 | 348.284         | 1461.247      | 96.98     | 97.52       |
| 2      | 9.680                 | 10.642          | 37.231        | 3.04      | 2.48        |
| Total: |                       | 360.226         | 1498.479      | 100.00    | 100.00      |



**1-((2*R*, 3*S*, 4*S*)-2-(2-Ethyl-1*H*-benzo[d]imidazol-1-yl)-4-hydroxytetrahydrothiophen-3-yl)-2,2-dimethylpropan-1-one (**3w**)**

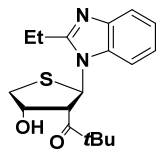

White solid, m.p. 201.9-205.2 °C, 11.8 mg, 71% yield.

$R_f = 0.12$  (Pet/EtOAc, 1/1, v/v).

$[\alpha]_D^{22} = -55.7$  ( $c = 0.38$ ,  $\text{CH}_2\text{Cl}_2$ ).

**HPLC** CHIRALCEL OD-H, n-hexane/2-propanol = 80/20, flow rate = 0.8 mL/min,  $\lambda = 256$  nm, retention time: 5.813 min (minor), 7.348 min (major), 94% ee, >20:1 dr.

**$^1\text{H NMR}$**  (600 MHz,  $\text{CDCl}_3$ )  $\delta$  7.70-7.74 (m, 1H), 7.61-7.67 (m, 1H), 7.23-7.29 (m, 2H), 6.69 (d,  $J = 9.6$  Hz, 1H), 4.76 (s, 1H), 4.43 (dd,  $J = 3.0, 10.2$  Hz, 1H), 3.77 (dd,  $J = 3.0, 12.0$  Hz, 1H), 3.34 (d,  $J = 12.0$  Hz, 1H), 2.82-2.85 (m, 2H), 1.41 (t,  $J = 7.2$  Hz, 1H), 0.75 (s, 9H).

**$^{13}\text{C NMR}$**  (150 MHz,  $\text{CDCl}_3$ )  $\delta$  215.5, 156.2, 143.5, 122.6, 122.5, 120.3, 111.5, 76.0, 64.3, 58.6, 56.2, 45.5, 42.5, 24.9, 20.9, 18.6, 12.0.

**HRMS** (ESI-TOF):  $[\text{M}+\text{H}]^+$  calcd for  $\text{C}_{18}\text{H}_{25}\text{N}_2\text{O}_2\text{S}$  333.1631 found 333.1630.

Racemic sample of **3w**

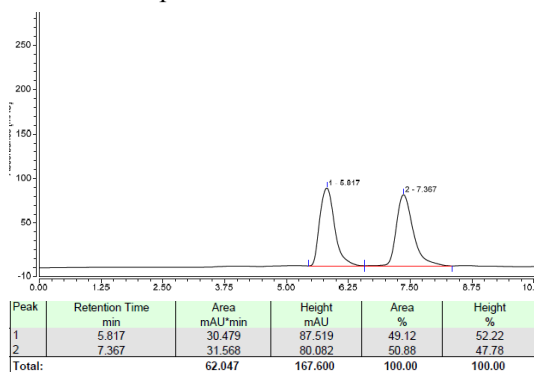

**3w**

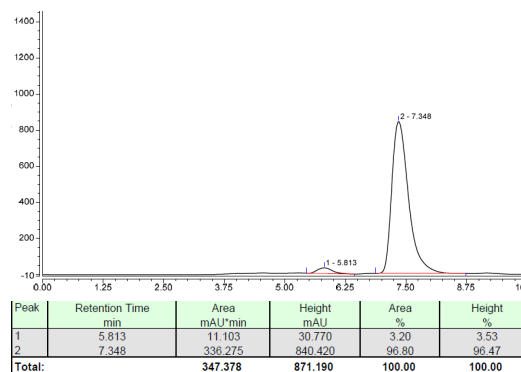

**1-((2*R*, 3*S*, 4*S*)-4-Hydroxy-2-(2-methyl-1*H*-benzo[d]imidazol-1-yl)tetrahydrothiophen-3-yl)-2,2-dimethylpropan-1-one (**3x**)**

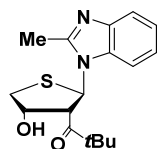

White solid, m.p. 199.7-204.5 °C, 13.7 mg, 86% yield.

$R_f = 0.10$  (Pet/EtOAc, 1/1, v/v).

$[\alpha]_D^{22} = -55.5$  ( $c = 0.61$ ,  $\text{CH}_2\text{Cl}_2$ ).

HPLC CHIRALCELID-H, n-hexane/2-propanol = 80/20, flow rate = 0.8 mL/min,  $\lambda = 256$  nm, retention time: 13.162 min (major), 17.343 min (minor), 94% ee, >20:1 dr.

$^1\text{H NMR}$  (600 MHz,  $\text{CDCl}_3$ )  $\delta$  7.61-7.70 (m, 2H), 7.23-7.28 (m, 2H), 6.68 (d,  $J = 9.6$  Hz, 1H), 4.77 (s, 1H), 4.37 (dd,  $J = 3.0, 10.2$  Hz, 1H), 3.76 (dd,  $J = 3.0, 11.4$  Hz, 1H), 3.50 (br, 1H), 3.33 (d,  $J = 11.4$  Hz, 1H), 2.54 (s, 3H), 0.75 (s, 9H).

$^{13}\text{C NMR}$  (150 MHz,  $\text{CDCl}_3$ )  $\delta$  215.1, 151.7, 143.4, 132.8, 122.7, 122.5, 120.1, 111.5, 75.9, 64.6, 56.5, 45.5, 42.5, 24.9, 14.2.

HRMS (ESI-TOF):  $[\text{M}+\text{Na}]^+$  calcd for  $\text{C}_{17}\text{H}_{22}\text{N}_2\text{NaO}_2\text{S}$  341.1294 found 341.1290.

Racemic sample of **3x**

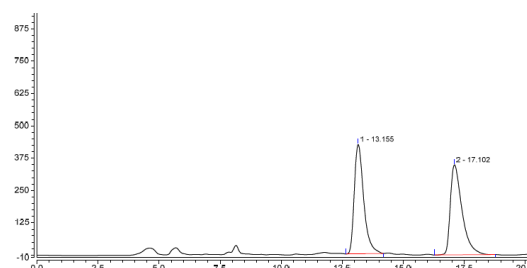

| Peak   | Retention Time<br>min | Area<br>mAU*min | Height<br>mAU | Area<br>% | Height<br>% |
|--------|-----------------------|-----------------|---------------|-----------|-------------|
| 1      | 13.155                | 189.764         | 423.437       | 49.58     | 54.85       |
| 2      | 17.102                | 192.946         | 348.516       | 50.42     | 45.15       |
| Total: |                       | 382.710         | 771.953       | 100.00    | 100.00      |

**3x**

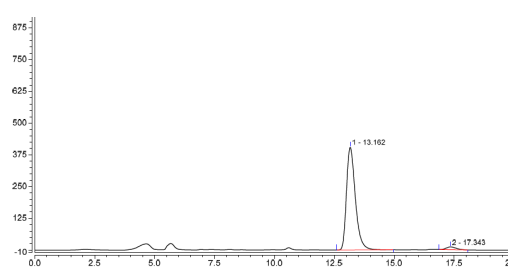

| Peak   | Retention Time<br>min | Area<br>mAU*min | Height<br>mAU | Area<br>% | Height<br>% |
|--------|-----------------------|-----------------|---------------|-----------|-------------|
| 1      | 13.162                | 173.719         | 404.782       | 97.08     | 97.40       |
| 2      | 17.343                | 5.234           | 10.786        | 2.92      | 2.60        |
| Total: |                       | 178.953         | 415.568       | 100.00    | 100.00      |

**1-((2*R*, 3*S*, 4*S*)-4-Hydroxy-2-(2-phenyl-1*H*-benzo[d]imidazol-1-yl)tetrahydrothiophen-3-yl)-2,2-dimethylpropan-1-one (**3y**)**

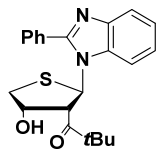

White solid, m.p. 204.9-208.0 °C, 13.0 mg, 68% yield.

$R_f = 0.25$  (Pet/EtOAc, 2/1, v/v).

$[\alpha]_D^{22} = -48.3$  ( $c = 0.39$ ,  $\text{CH}_2\text{Cl}_2$ ).

**HPLC** CHIRALCEL IE, n-hexane/2-propanol = 80/20, flow rate = 0.8 mL/min,  $\lambda = 256$  nm, retention time: 13.187 min (major), 14.562 min (minor), 89% ee, >20:1 dr.

**$^1\text{H NMR}$**  (600 MHz,  $\text{CDCl}_3$ )  $\delta$  7.77-7.86 (m, 2H), 7.57 (s, 5H), 7.32-7.38 (m, 2H), 6.72 (d,  $J = 9.6$  Hz, 1H), 4.63-4.68 (m, 1H), 4.46 (dd,  $J = 3.0, 9.6$  Hz, 1H), 3.74 (dd,  $J = 3.0, 12.0$  Hz, 1H), 3.30 (d,  $J = 12.0$  Hz, 1H), 3.23 (s, 1H), 0.68 (s, 9H).

**$^{13}\text{C NMR}$**  (150 MHz,  $\text{CDCl}_3$ )  $\delta$  215.0, 154.3, 144.1, 133.1, 130.4, 129.5, 129.4, 129.1, 123.3, 123.2, 121.2, 112.3, 76.2, 66.0, 58.6, 55.3, 45.4, 42.4, 24.8, 18.6.

**HRMS** (ESI-TOF):  $[\text{M}+\text{H}]^+$  calcd for  $\text{C}_{22}\text{H}_{25}\text{N}_2\text{O}_2\text{S}$  381.1631 found 381.1628.

Racemic sample of **3y**

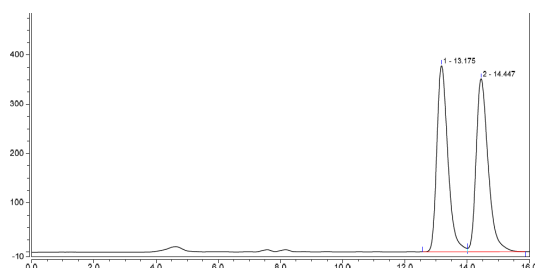

| Peak          | Retention Time<br>min | Area<br>mAU·min | Height<br>mAU  | Area<br>%     | Height<br>%   |
|---------------|-----------------------|-----------------|----------------|---------------|---------------|
| 1             | 13.175                | 155.840         | 378.281        | 49.76         | 51.84         |
| 2             | 14.447                | 157.364         | 351.460        | 50.24         | 48.16         |
| <b>Total:</b> |                       | <b>313.204</b>  | <b>729.742</b> | <b>100.00</b> | <b>100.00</b> |

**3y**

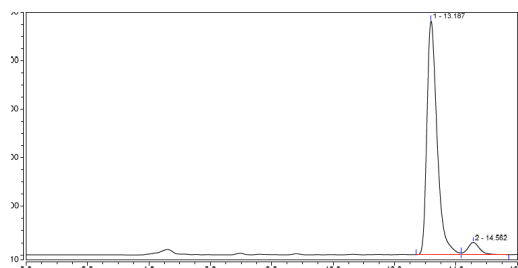

| Peak          | Retention Time<br>min | Area<br>mAU·min | Height<br>mAU  | Area<br>%     | Height<br>%   |
|---------------|-----------------------|-----------------|----------------|---------------|---------------|
| 1             | 13.187                | 185.547         | 481.713        | 94.34         | 95.04         |
| 2             | 14.562                | 11.137          | 25.164         | 5.66          | 4.96          |
| <b>Total:</b> |                       | <b>196.684</b>  | <b>506.877</b> | <b>100.00</b> | <b>100.00</b> |

**1-((2*R*, 3*S*, 4*S*)-4-Hydroxy-2-(2-(trifluoromethyl)-1*H*-benzo[d]imidazol-1-yl)tetrahydrothiophen-3-yl)-2,2-dimethylpropan-1-one (**3z**)**

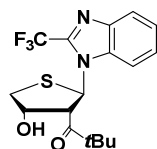

White solid, m.p. 169.9-173.8 °C, 17.9 mg, 96% yield.

$R_f = 0.30$  (Pet/EtOAc, 2/1, v/v).

$[\alpha]_D^{22} = -65.1$  ( $c = 0.61$ ,  $\text{CH}_2\text{Cl}_2$ ).

**HPLC** CHIRALCEL OD-H, n-hexane/2-propanol = 90/10, flow rate = 1.0 mL/min,  $\lambda = 256$  nm, retention time: 6.375 min (minor), 7.653 min (major), 93% ee, >20:1 dr.

**$^1\text{H NMR}$**  (600 MHz,  $\text{CDCl}_3$ )  $\delta$  7.91 (d,  $J = 8.4$  Hz, 1H), 7.76 (d,  $J = 8.4$  Hz, 1H), 7.50 (t,  $J = 7.8$  Hz, 1H), 7.43 (t,  $J = 7.2$  Hz, 1H), 6.72 (d,  $J = 9.0$  Hz, 1H), 4.77 (s, 1H), 4.44 (dd,  $J = 3.6, 9.6$  Hz, 1H), 3.77 (dd,  $J = 1.8, 12.0$  Hz, 1H), 3.70 (br, 1H), 3.40 (dd,  $J = 1.8, 12.0$  Hz, 1H), 0.74 (s, 9H).

**$^{13}\text{C NMR}$**  (150 MHz,  $\text{CDCl}_3$ )  $\delta$  214.8, 142.0, 140.8 (d,  $J_{\text{C-F}} = 39.0$  Hz), 133.2, 125.8, 124.4, 122.9, 121.5, 119.7, 117.9, 112.9, 76.8, 65.8, 58.6, 55.4, 45.5, 42.8, 24.6, 18.6.

**$^{19}\text{F NMR}$**  (565 MHz,  $\text{CDCl}_3$ )  $\delta$  -60.8.

**HRMS** (ESI-TOF):  $[\text{M}+\text{Na}]^+$  calcd for  $\text{C}_{17}\text{H}_{19}\text{F}_3\text{N}_2\text{NaO}_2\text{S}$  395.1012 found 395.1011.

Racemic sample of **3z**

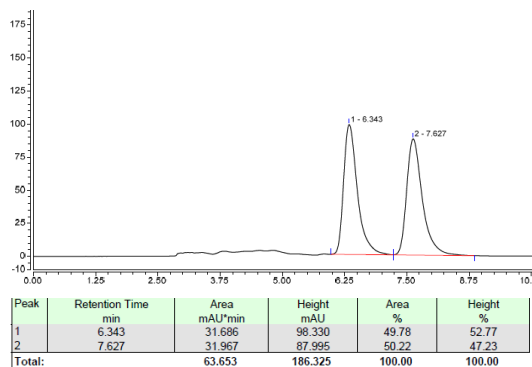

**3z**

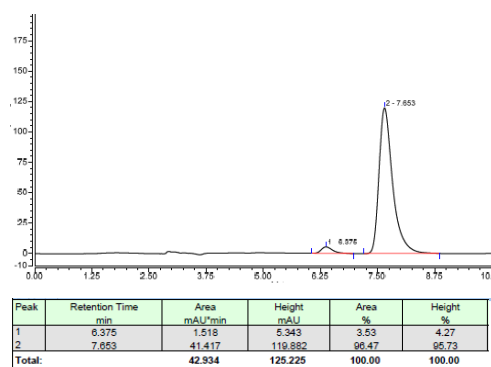

**1-((2*R*, 3*S*, 4*S*)-2-(5,6-Dimethyl-1*H*-benzo[d]imidazol-1-yl)-4-hydroxytetrahydrothiophen-3-yl)-2,2-dimethylpropan-1-one (3aa)**

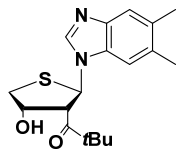

White solid, m.p. 116.8-118.6 °C, 13.3 mg, 80% yield.

$R_f = 0.10$  (Pet/EtOAc, 1/1, v/v).

$[\alpha]_D^{22} = -10.7$  ( $c = 0.93$ ,  $\text{CH}_2\text{Cl}_2$ ).

**HPLC** CHIRALCEL ID, n-hexane/2-propanol = 80/20, flow rate = 0.8 mL/min,  $\lambda = 256$  nm, retention time: 18.733 min (major), 21.970 min (minor), 98% ee, >20:1 dr.

**$^1\text{H}$  NMR** (600 MHz,  $\text{CDCl}_3$ )  $\delta$  8.00 (s, 1H), 7.51 (s, 1H), 7.22 (s, 1H), 6.56 (d,  $J = 9.6$  Hz, 1H), 4.75-4.78 (m, 1H), 4.03 (dd,  $J = 3.0, 9.6$  Hz, 1H), 3.73 (dd,  $J = 3.0, 12.0$  Hz, 1H), 3.30 (dd,  $J = 1.8, 12.0$  Hz, 1H), 2.39 (s, 3H), 2.35 (s, 3H), 0.78 (s, 9H).

**$^{13}\text{C}$  NMR** (150 MHz,  $\text{CDCl}_3$ )  $\delta$  214.9, 142.9, 141.3, 132.8, 132.0, 131.1, 120.9, 111.0, 76.3, 65.2, 59.6, 45.4, 42.2, 25.0, 20.9, 20.4.

**HRMS** (ESI-TOF):  $[\text{M}+\text{H}]^+$  calcd for  $\text{C}_{18}\text{H}_{25}\text{N}_2\text{O}_2\text{S}$  333.1631 found 333.1627.

Racemic sample of **3aa**

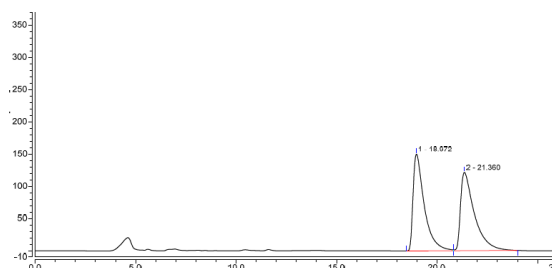

| Peak   | Retention Time<br>min | Area<br>mAU*min | Height<br>mAU | Area<br>% | Height<br>% |
|--------|-----------------------|-----------------|---------------|-----------|-------------|
| 1      | 18.733                | 264.314         | 396.197       | 98.79     | 98.91       |
| 2      | 21.970                | 3.245           | 4.369         | 1.21      | 1.09        |
| Total: |                       | 267.559         | 400.566       | 100.00    | 100.00      |

**3aa**

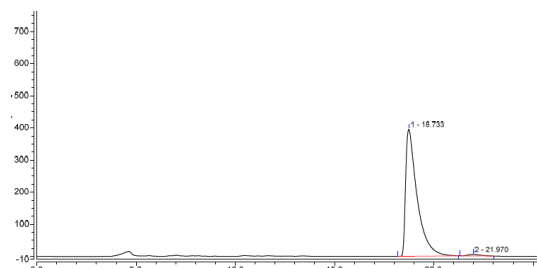

| Peak   | Retention Time<br>min | Area<br>mAU*min | Height<br>mAU | Area<br>% | Height<br>% |
|--------|-----------------------|-----------------|---------------|-----------|-------------|
| 1      | 18.733                | 264.314         | 396.197       | 98.79     | 98.91       |
| 2      | 21.970                | 3.245           | 4.369         | 1.21      | 1.09        |
| Total: |                       | 267.559         | 400.566       | 100.00    | 100.00      |

**1-((2*R*, 3*S*, 4*S*)-4-Hydroxy-2-(3*H*-imidazo[4,5-*c*]pyridin-3-yl)tetrahydrothiophen-3-yl)-2,2-dimethylpropan-1-one (3ab)**

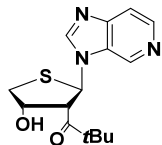

Colorless oil, 13.0 mg, 85% yield.

$R_f = 0.10$  (Pet/EtOAc, 1/1, v/v).

$[\alpha]_D^{22} = -4.44$  ( $c = 0.50$ ,  $\text{CH}_2\text{Cl}_2$ ).

**HPLC** CHIRALCEL OD-H, n-hexane/2-propanol = 90/10, flow rate = 1.0 mL/min,  $\lambda = 256$  nm, retention time: 20.916 min (major), 29.566 min (minor), 96% ee, >20:1 dr.

**$^1\text{H}$  NMR** (400 MHz,  $\text{CDCl}_3$ )  $\delta$  9.09 (s, 1H), 8.46 (d,  $J = 5.6$  Hz, 1H), 8.21 (s, 1H), 7.46 (d,  $J = 5.6$  Hz, 1H), 6.64 (d,  $J = 9.2$  Hz, 1H), 4.82 (br, 1H), 3.97 (dd,  $J = 2.8, 9.2$  Hz, 1H), 3.77 (dd,  $J = 3.2, 11.6$  Hz, 1H), 3.51 (br, 1H), 3.33 (dd,  $J = 1.2, 11.6$  Hz, 1H), 0.78 (s, 1H).

**$^{13}\text{C}$  NMR** (150 MHz,  $\text{CDCl}_3$ )  $\delta$  213.8, 144.0, 143.4, 142.7, 141.4, 137.7, 106.4, 76.1, 64.9, 60.4, 45.4, 42.3, 25.0, 18.6.

**HRMS** (ESI-TOF):  $[\text{M}+\text{H}]^+$  calcd for  $\text{C}_{15}\text{H}_{20}\text{N}_3\text{O}_2\text{S}$  306.1271 found 306.1269.

**Racemic sample of 3ab**

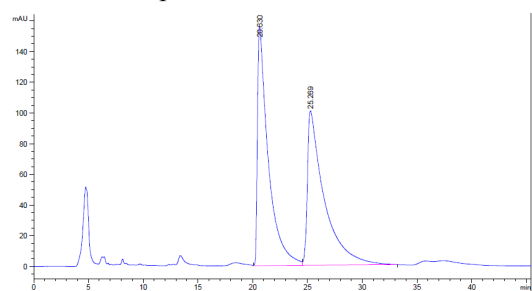

| Peak # | RetTime [min] | Type | Width [min] | Area [mAU*s] | Height [mAU] | Area %  |
|--------|---------------|------|-------------|--------------|--------------|---------|
| 1      | 20.630        | VV   | 0.9396      | 1.06752e4    | 155.74036    | 49.9754 |
| 2      | 25.269        | VB   | 1.4030      | 1.06857e4    | 100.68083    | 50.0246 |

**3ab**

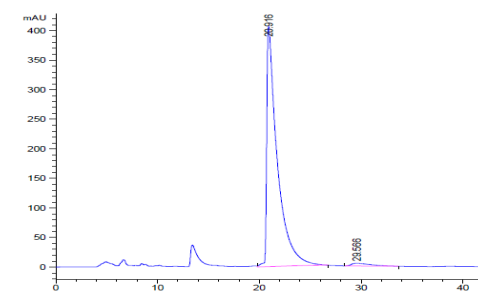

| Peak # | RetTime [min] | Type | Width [min] | Area [mAU*s] | Height [mAU] | Area %  |
|--------|---------------|------|-------------|--------------|--------------|---------|
| 1      | 20.916        | MM   | 1.1906      | 2.90598e4    | 406.78839    | 97.9967 |
| 2      | 29.566        | BB   | 1.4731      | 594.06274    | 4.73763      | 2.0033  |

**1-((2*R*, 3*S*, 4*S*)-4-Hydroxy-2-(2-phenyl-1*H*-imidazol-1-yl)tetrahydrothiophen-3-yl)-2,2-dimethylpropan-1-one (**3ac**)**

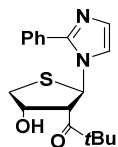

White solid, m.p. 161.6-169.0 °C, 12.1 mg, 73% yield.

$R_f = 0.10$  (Pet/EtOAc, 1/1, v/v).

$[\alpha]_D^{22} = -117.1$  ( $c = 1.02$ ,  $\text{CH}_2\text{Cl}_2$ ).

**HPLC** CHIRALCEL ID, n-hexane/2-propanol = 80/20, flow rate = 0.8 mL/min,  $\lambda = 256$  nm, retention time: 13.272 min (major), 15.257 min (minor), 99% ee, >20:1 dr.

**$^1\text{H NMR}$**  (600 MHz,  $\text{CDCl}_3$ )  $\delta$  7.42-7.49 (m, 5H), 7.42 (d,  $J = 1.2$  Hz, 1H), 7.18 (s, 1H), 6.43 (d,  $J = 9.0$  Hz, 1H), 4.62-4.65 (m, 1H), 3.85 (dd,  $J = 3.0, 9.0$  Hz, 1H), 3.59 (dd,  $J = 3.6, 11.4$  Hz, 1H), 3.14 (dd,  $J = 1.8, 12.0$  Hz, 1H), 0.91 (s, 9H).

**$^{13}\text{C NMR}$**  (150 MHz,  $\text{CDCl}_3$ )  $\delta$  214.0, 148.7, 130.1, 129.7, 129.4, 129.2, 128.9, 117.4, 76.1, 65.1, 60.9, 45.3, 41.9, 25.1.

**HRMS** (ESI-TOF):  $[\text{M}+\text{Na}]^+$  calcd for  $\text{C}_{18}\text{H}_{22}\text{N}_2\text{NaO}_2\text{S}$  353.1294 found 353.1291.

Racemic sample of **3ac**

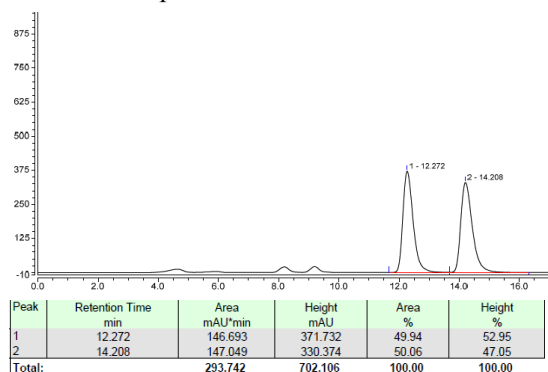

**3ac**

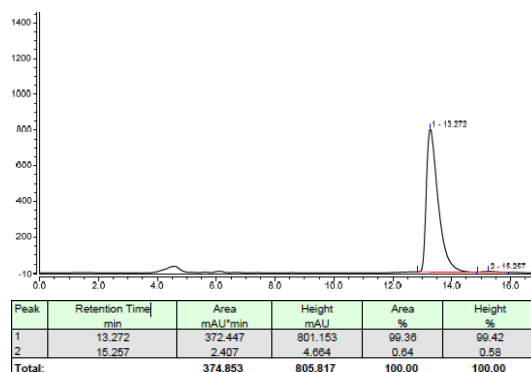

**1-((2*R*, 3*S*, 4*S*)-2-(4,5-Diphenyl-1*H*-imidazol-1-yl)-4-hydroxytetrahydrothiophen-3-yl)-2,2-dimethylpropan-1-one (**3ad**)**

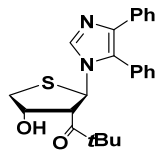

White solid, m.p. 156.5-161.3°C, 15.0 mg, 74% yield.

$R_f = 0.10$  (Pet/EtOAc, 1/1, v/v).

$[\alpha]_D^{22} = -88.2$  ( $c = 0.62$ ,  $\text{CH}_2\text{Cl}_2$ ).

HPLC CHIRALCEL ID, n-hexane/2-propanol = 70/30, flow rate = 0.8 mL/min,  $\lambda = 256$  nm, retention time: 10.873 min (major), 11.917 min (minor), 97% ee, >20:1 dr.

$^1\text{H NMR}$  (600 MHz,  $\text{CDCl}_3$ )  $\delta$  8.05 (s, 1H), 7.45-7.51 (m, 3H), 7.37-7.41 (m, 2H), 7.22-7.26 (m, 2H), 7.16-7.20 (m, 2H), 7.11-7.15 (m, 1H), 6.00 (d,  $J = 9.6$  Hz, 1H), 4.61-4.65 (m, 1H), 3.94 (dd,  $J = 3.6, 9.0$  Hz, 1H), 3.52 (dd,  $J = 3.0, 11.4$  Hz, 1H), 3.11 (dd,  $J = 1.8, 11.4$  Hz, 1H), 0.99 (s, 9H).

$^{13}\text{C NMR}$  (150 MHz,  $\text{CDCl}_3$ )  $\delta$  213.6, 138.4, 135.5, 134.1, 131.2, 129.4, 129.4, 129.3, 128.7, 128.3, 126.8, 126.8, 76.2, 63.3, 61.0, 45.3, 41.9, 25.2.

**HRMS** (ESI-TOF):  $[\text{M}+\text{H}]^+$  calcd for  $\text{C}_{24}\text{H}_{27}\text{N}_2\text{O}_2\text{S}$  407.1788 found 407.1784.

Racemic sample of **3ad**

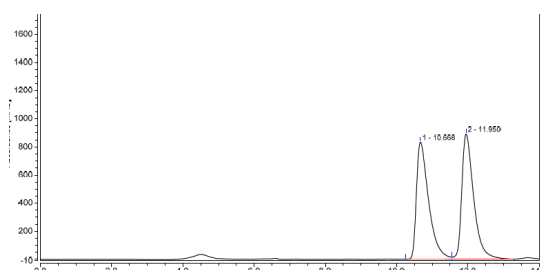

| Peak   | Retention Time<br>min | Area<br>mAU*min | Height<br>mAU | Area<br>% | Height<br>% |
|--------|-----------------------|-----------------|---------------|-----------|-------------|
| 1      | 10.668                | 329.926         | 832.885       | 48.93     | 48.32       |
| 2      | 11.950                | 344.287         | 890.947       | 51.07     | 51.68       |
| Total: |                       | 674.213         | 1723.832      | 100.00    | 100.00      |

**3ad**

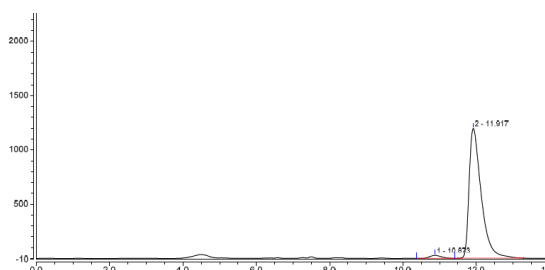

| Peak   | Retention Time<br>min | Area<br>mAU*min | Height<br>mAU | Area<br>% | Height<br>% |
|--------|-----------------------|-----------------|---------------|-----------|-------------|
| 1      | 10.873                | 9.777           | 26.511        | 2.09      | 2.17        |
| 2      | 11.917                | 457.618         | 1196.416      | 97.91     | 97.83       |
| Total: |                       | 467.395         | 1222.927      | 100.00    | 100.00      |



**((3*R*,5*R*,7*R*)-Adamantan-1-yl)((2*R*,3*R*,4*R*)-2-(6-chloro-9*H*-purin-9-yl)-4-fluorotetrahydrothiophen-3-yl)methanone (5a)**

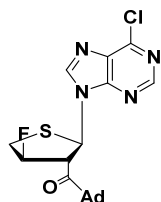

Colorless oil, 15.8 mg, 75% yield.

$R_f = 0.13$  (Pet/EtOAc, 4/1, v/v).

$[\alpha]_D^{22} = -1.8$  ( $c = 0.37$ ,  $\text{CH}_2\text{Cl}_2$ ).

HPLC CHIRALCEL IE, n-hexane/2-propanol = 70/30, flow rate = 0.8 mL/min,  $\lambda = 256$  nm, retention time: 18.005 min (minor), 20.735 min (major), 90% ee, >20:1 dr.

$^1\text{H NMR}$  (600 MHz,  $\text{CDCl}_3$ )  $\delta$  8.76 (s, 1H), 8.51 (s, 1H), 6.29 (d,  $J = 3.0$  Hz, 1H), 5.31 (dq,  $J = 4.2, 50.4$  Hz, 1H), 4.33 (dt,  $J = 3.6, 17.4$  Hz, 1H), 3.67-3.75 (m, 1H), 3.51 (ddd,  $J = 4.2, 12.0, 28.2$  Hz, 1H), 2.00 (s, 3H), 1.64-1.75 (m, 9H), 1.58-1.63 (m, 3H).

$^{13}\text{C NMR}$  (100 MHz,  $\text{CDCl}_3$ )  $\delta$  210.4 (d,  $J = 7.0$  Hz, 1H), 152.25, 151.4 (d,  $J = 12.0$  Hz, 1H), 145.1 (d,  $J = 7.0$  Hz, 1H), 132.20, 96.7 (d,  $J = 187.0$  Hz), 62.0 (d,  $J = 3.0$  Hz), 60.1 (d,  $J = 20.0$  Hz), 47.76, 39.0 (d,  $J = 21.0$  Hz), 37.38, 36.22, 27.56.

$^{19}\text{F NMR}$  (376 MHz,  $\text{CDCl}_3$ )  $\delta$  -170.3.

HRMS (ESI-TOF):  $[\text{M}+\text{Na}]^+$  calcd for  $\text{C}_{20}\text{H}_{22}\text{ClFN}_4\text{NaOS}$  443.1079 found 443.1073.

Racemic sample of **5a**

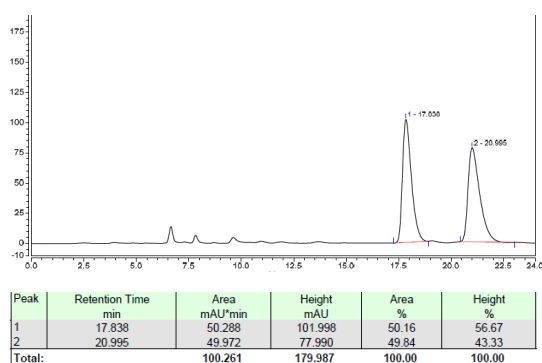

**5a**

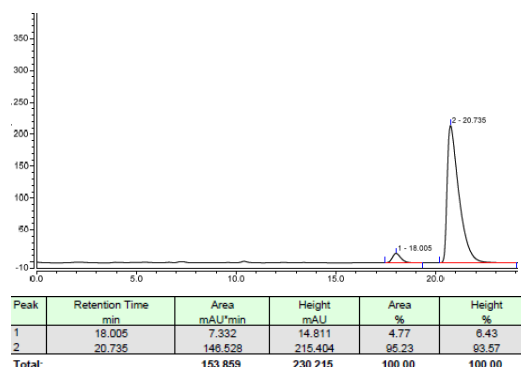

**((3*S*,5*S*,7*S*)-Adamantan-1-yl)((2*R*,3*S*,4*S*)-2-(6-chloro-9*H*-purin-9-yl)-4-hydroxy-1,1-dioxidotetrahydrothiophen-3-yl)methanone (5b)**

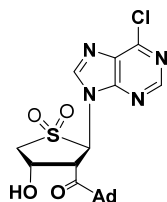

Colorless oil, 19.2 mg, 85% yield.

$R_f = 0.10$  (Pet/EtOAc, 1/1, v/v).

$[\alpha]_D^{22} = 1.71$  ( $c = 0.35$ ,  $\text{CH}_2\text{Cl}_2$ ).

**HPLC** CHIRALCEL IE, n-hexane/2-propanol = 70/30, flow rate = 0.8 mL/min,  $\lambda = 256$  nm, retention time: 26.106 min (major), 43.673 min (minor), 90% ee, >20:1 dr.

**$^1\text{H}$  NMR** (600 MHz,  $\text{CDCl}_3$ )  $\delta$  8.79 (s, 1H), 8.41 (s, 1H), 6.58 (d,  $J = 10.8$  Hz, 1H), 5.31 (dd,  $J = 4.2, 10.8$  Hz, 1H), 5.16 (s, 1H), 4.06-4.16 (m, 1H), 3.76-3.89 (m, 2H), 1.96 (s, 3H), 1.60-1.74 (m, 9H), 1.53-1.58 (m, 3H).

**$^{13}\text{C}$  NMR** (150 MHz,  $\text{CDCl}_3$ )  $\delta$  208.5, 152.5, 152.1, 151.9, 145.9, 132.1, 71.9, 65.9, 59.6, 51.0, 47.9, 37.5, 36.1, 27.5.

**HRMS** (ESI-TOF):  $[\text{M}+\text{Na}]^+$  calcd for  $\text{C}_{20}\text{H}_{23}\text{ClN}_4\text{NaO}_4\text{S}$  473.1021 found 473.1020.

**Racemic sample of 5b**

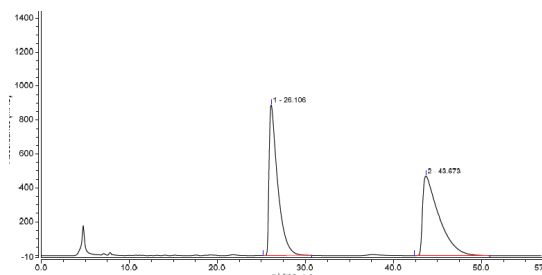

| Peak   | Retention Time<br>min | Area<br>mAU*min | Height<br>mAU | Area<br>% | Height<br>% |
|--------|-----------------------|-----------------|---------------|-----------|-------------|
| 1      | 26.106                | 1004.380        | 887.911       | 50.04     | 65.42       |
| 2      | 43.673                | 1002.840        | 469.395       | 49.96     | 34.58       |
| Total: |                       | 2007.220        | 1357.306      | 100.00    | 100.00      |

**5b**

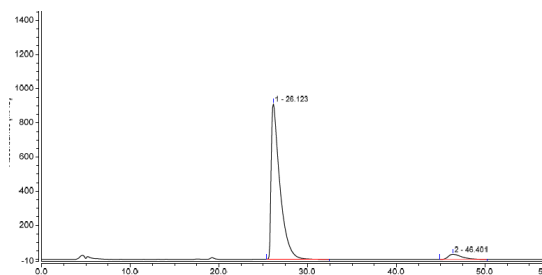

| Peak   | Retention Time<br>min | Area<br>mAU*min | Height<br>mAU | Area<br>% | Height<br>% |
|--------|-----------------------|-----------------|---------------|-----------|-------------|
| 1      | 26.123                | 1034.850        | 909.736       | 95.14     | 96.80       |
| 2      | 46.401                | 52.853          | 30.079        | 4.86      | 3.20        |
| Total: |                       | 1087.703        | 939.816       | 100.00    | 100.00      |

## 7. Copies of $^1\text{H}$ , $^{13}\text{C}$ NMR and $^{19}\text{F}$ NMR spectra

### $^1\text{H}$ NMR of **1a** (400 MHz, $\text{CDCl}_3$ )

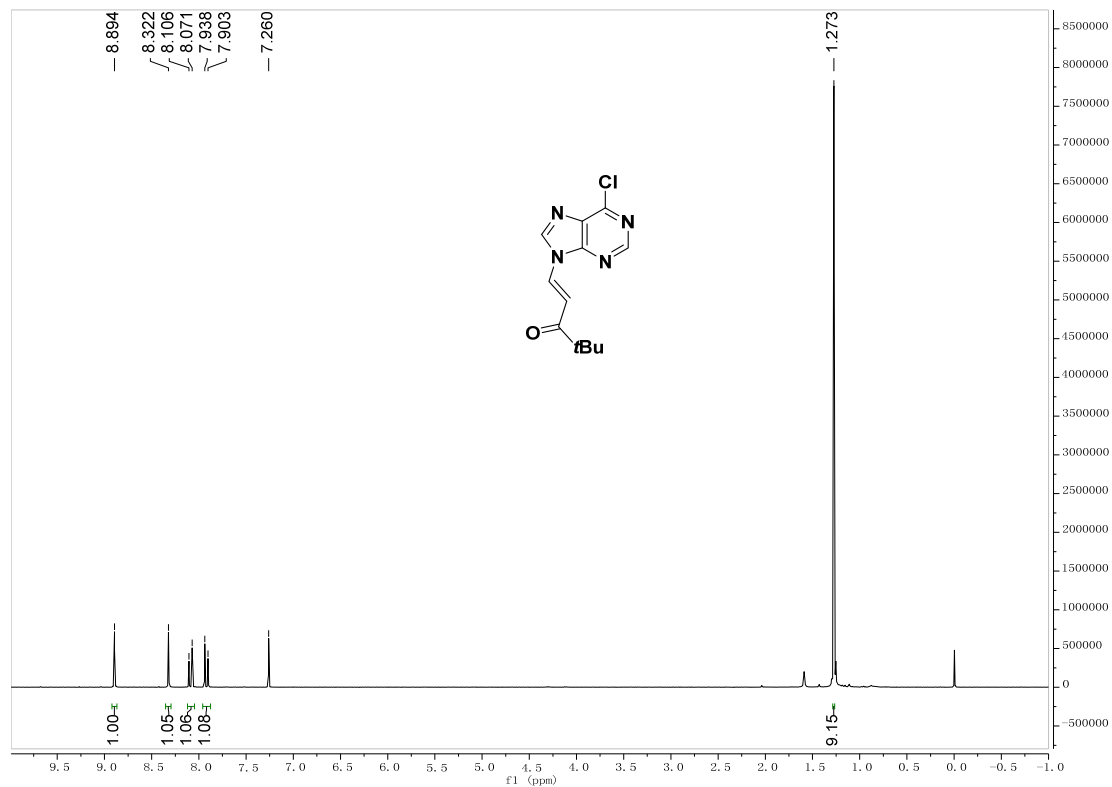

### $^{13}\text{C}$ NMR of **1a** (100 MHz, $\text{CDCl}_3$ )

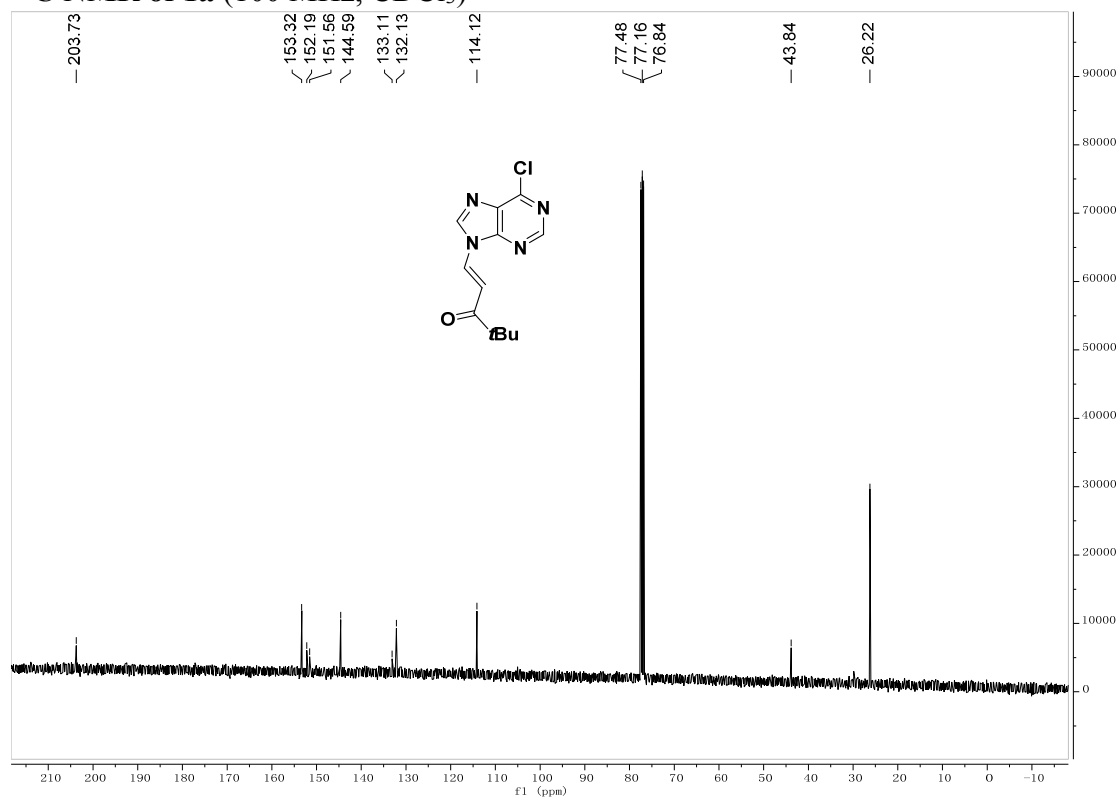

**<sup>1</sup>H NMR of 1b (600 MHz, CDCl<sub>3</sub>)**

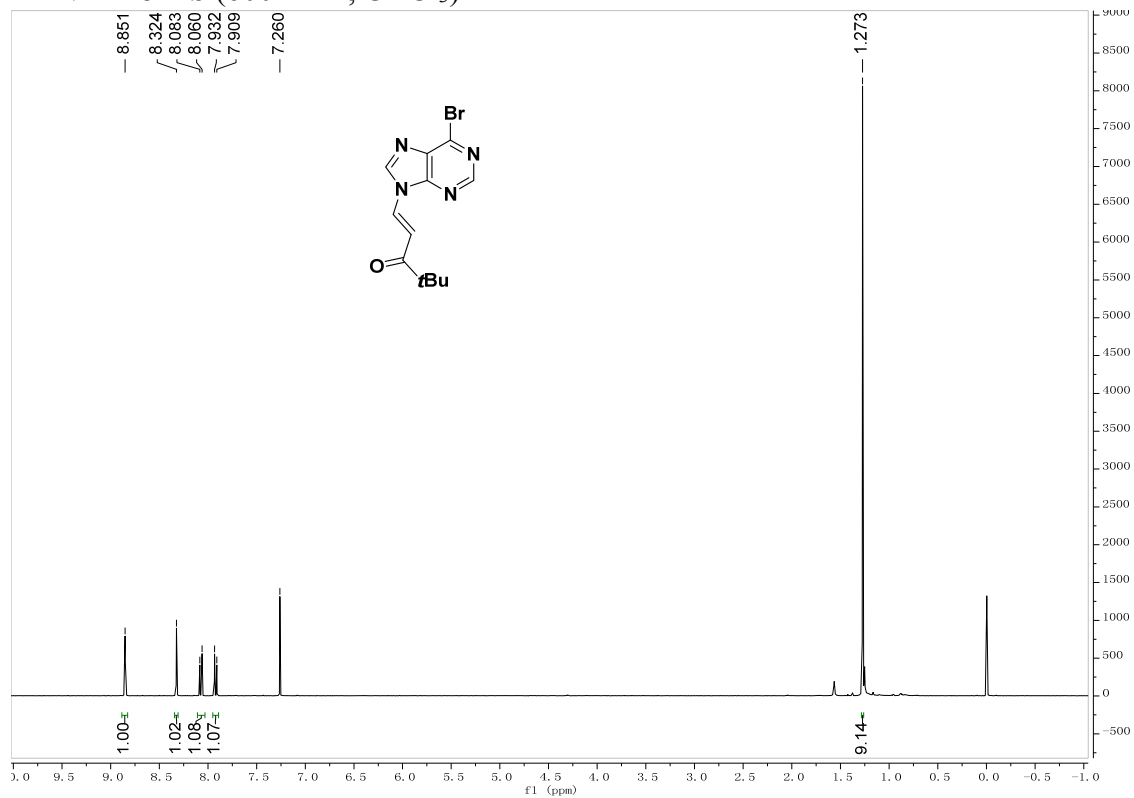

**<sup>13</sup>C NMR of 1b (150 MHz, CDCl<sub>3</sub>)**

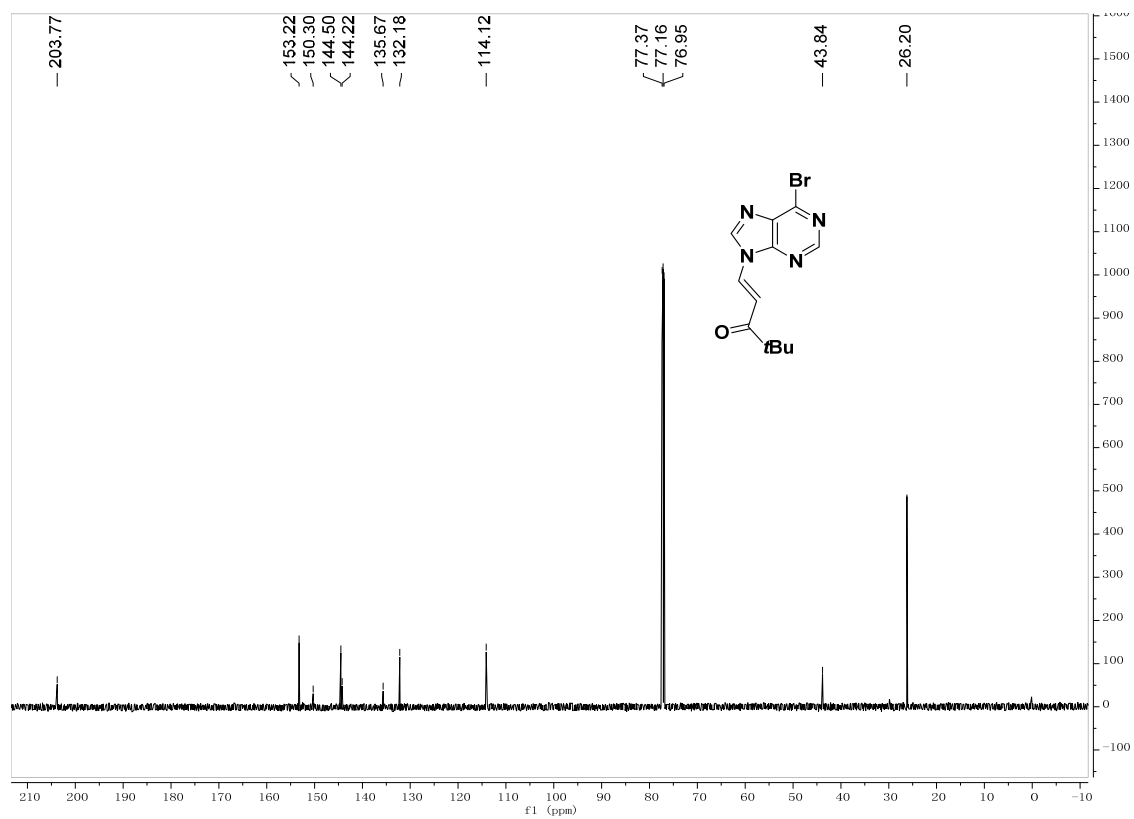

### <sup>1</sup>H NMR of 1c (400 MHz, CDCl<sub>3</sub>)

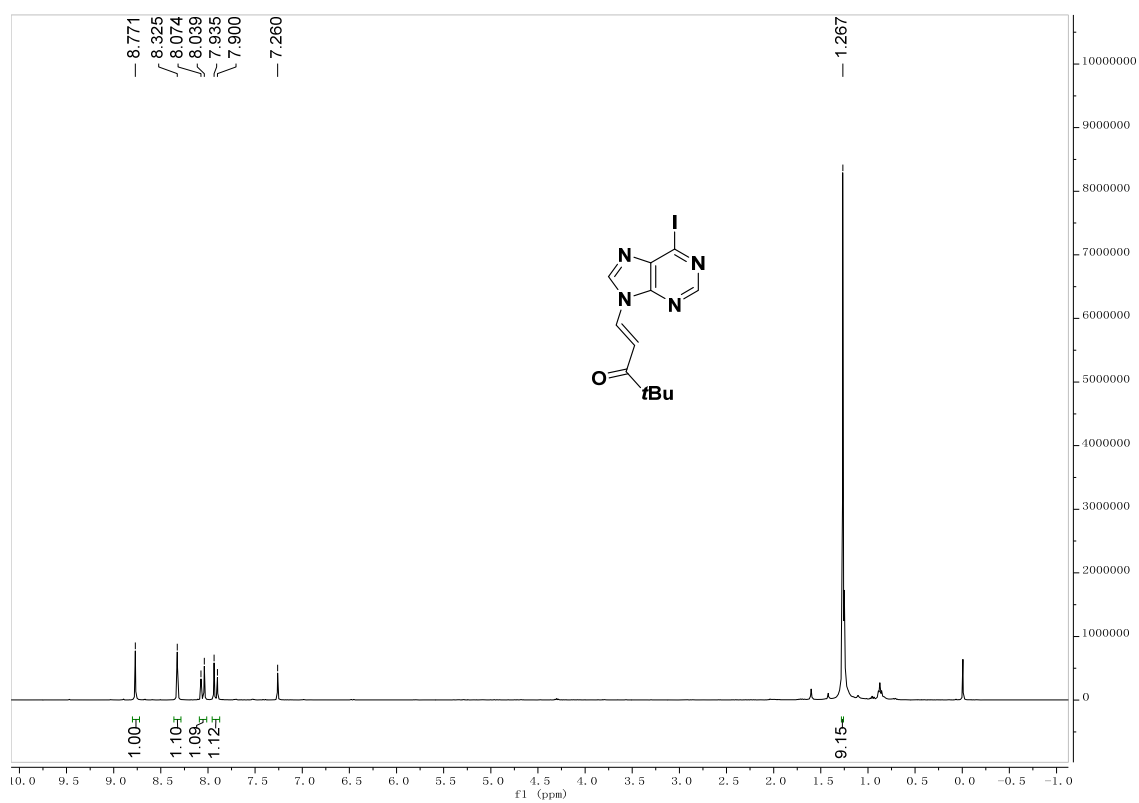

### <sup>13</sup>C NMR of 1c (100 MHz, CDCl<sub>3</sub>)

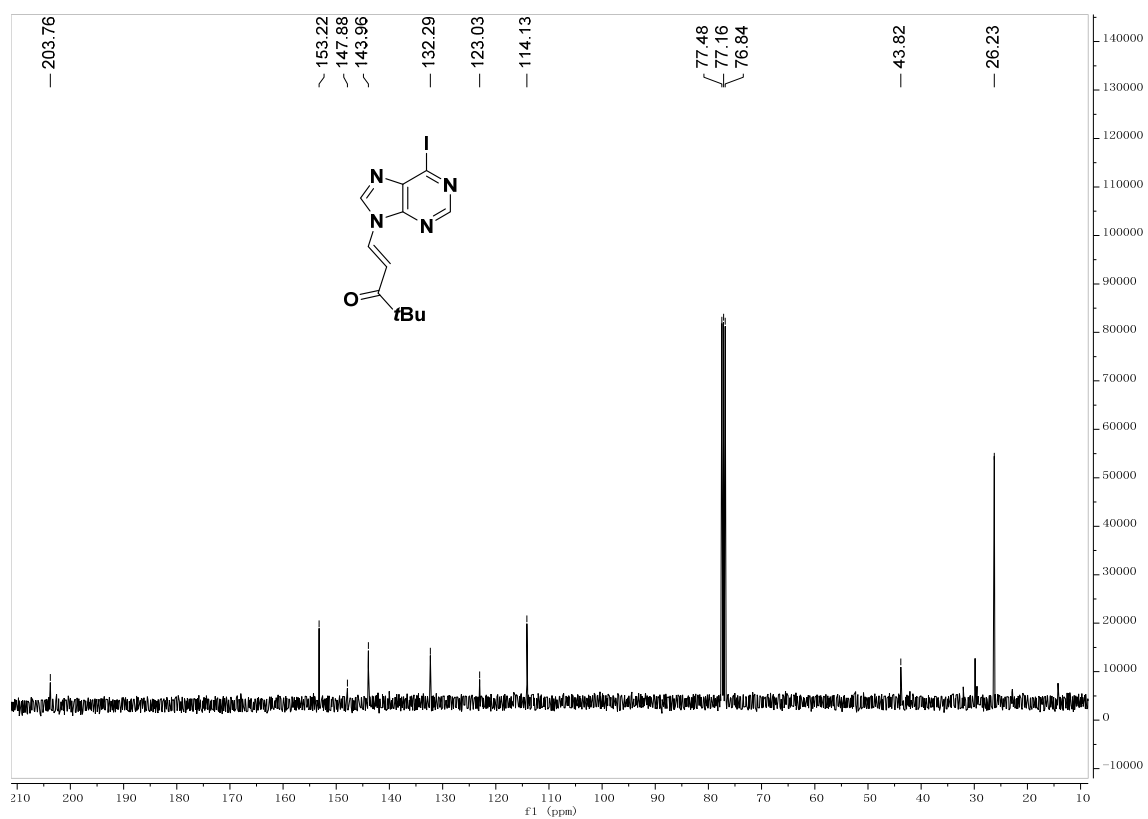

### <sup>1</sup>H NMR of 1d (400 MHz, CDCl<sub>3</sub>)

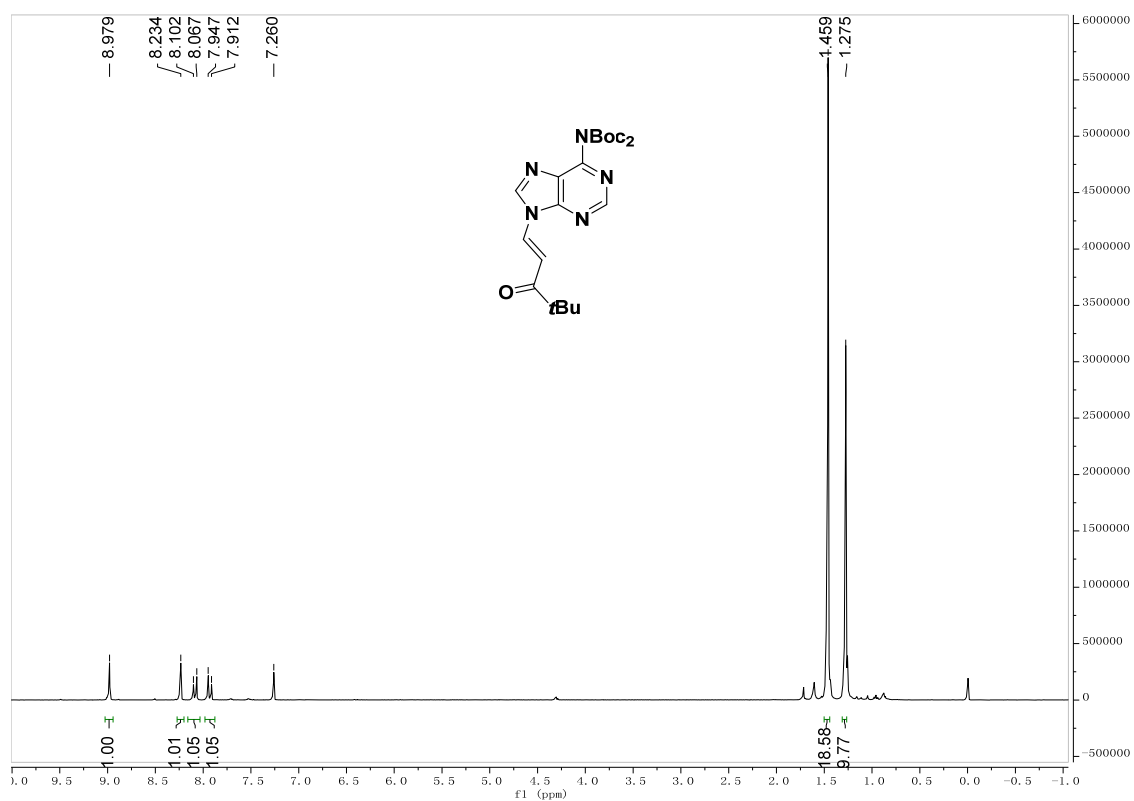

### <sup>13</sup>C NMR of 1d (100 MHz, CDCl<sub>3</sub>)

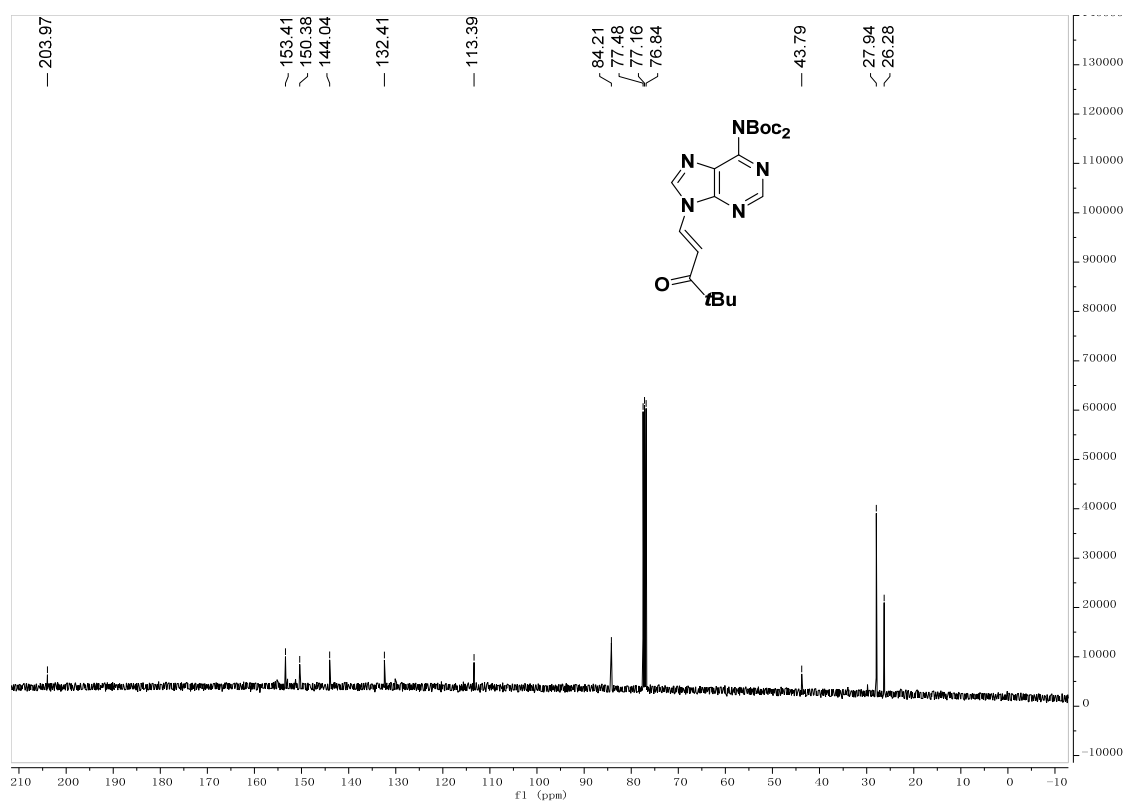

### <sup>1</sup>H NMR of 1e (600 MHz, CDCl<sub>3</sub>)

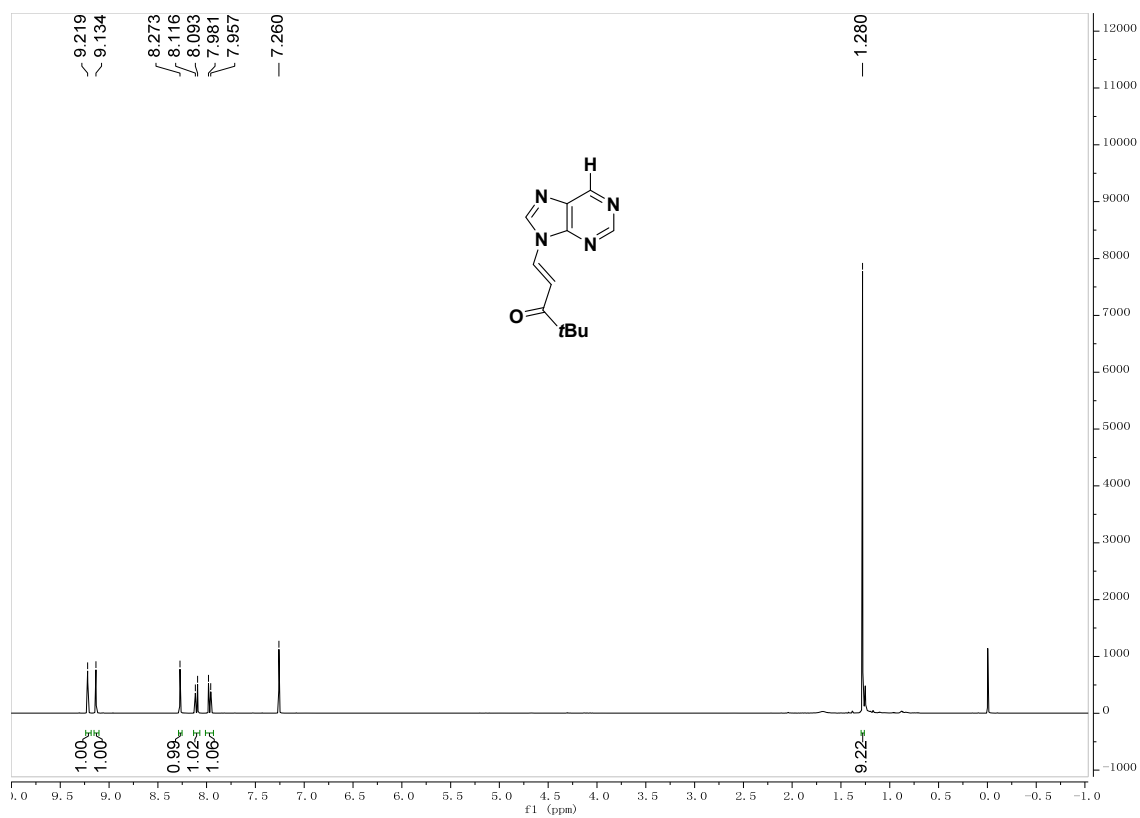

### <sup>13</sup>C NMR of 1e (150 MHz, CDCl<sub>3</sub>)

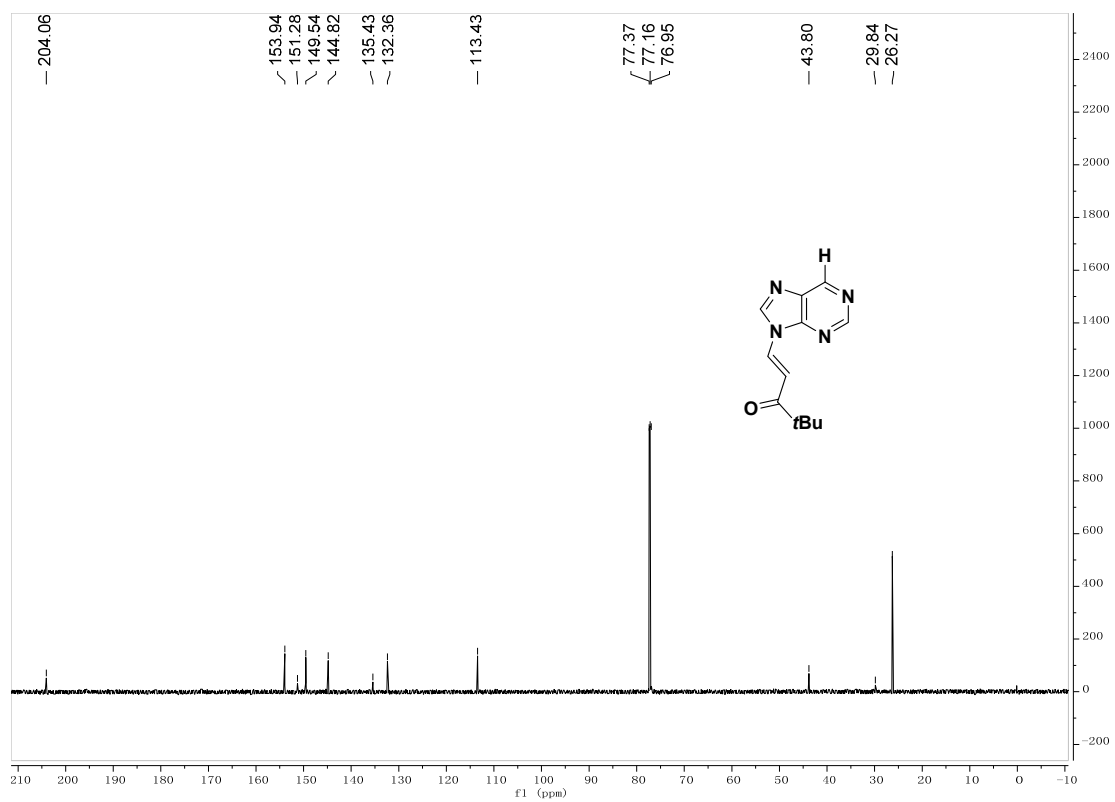

**<sup>1</sup>H NMR of 1f (400 MHz, CDCl<sub>3</sub>)**

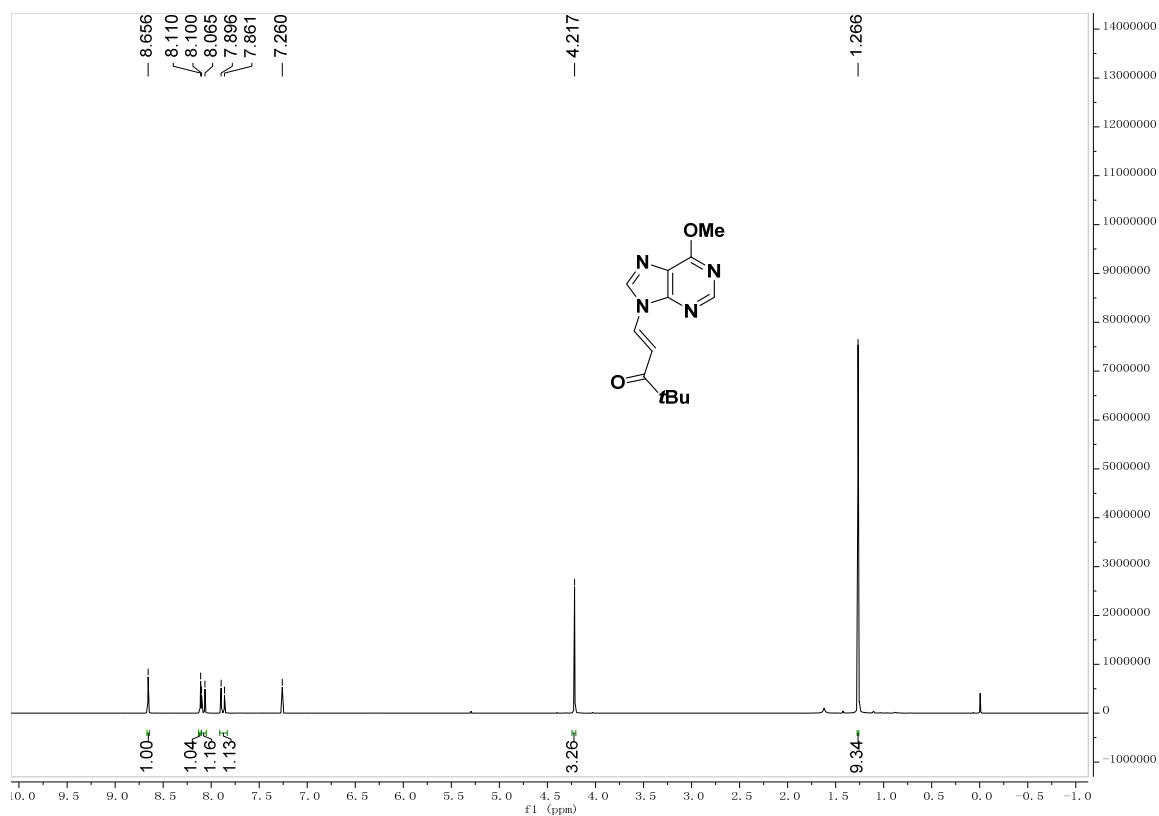

**<sup>13</sup>C NMR of 1f (100 MHz, CDCl<sub>3</sub>)**

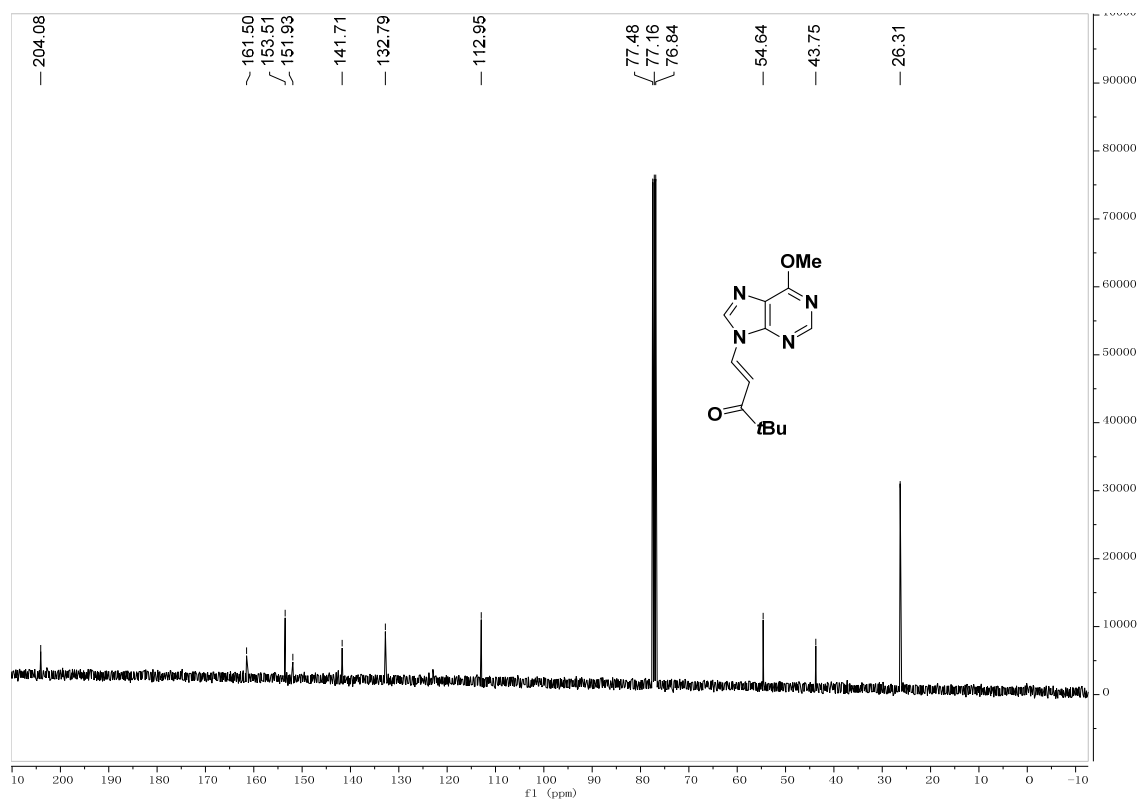



**<sup>1</sup>H NMR of 1g (400 MHz, DMSO-*d*<sub>6</sub>)**

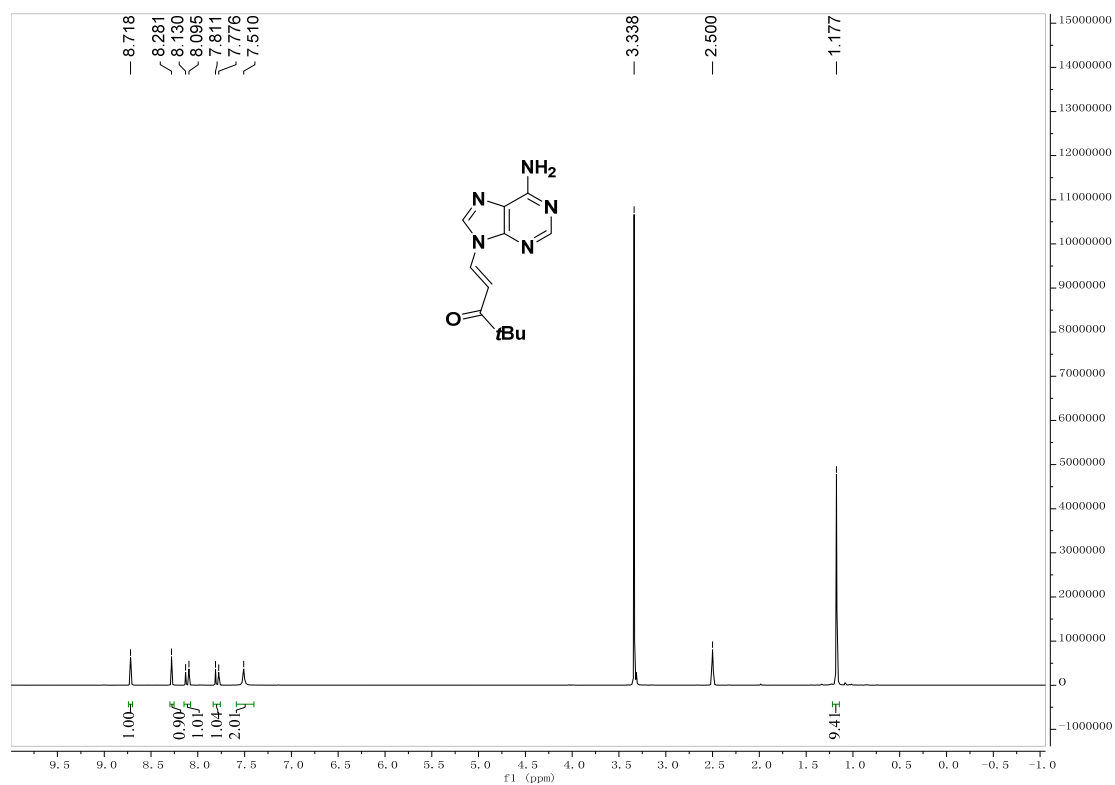

**<sup>13</sup>C NMR of 1g (100 MHz, DMSO-*d*<sub>6</sub>)**

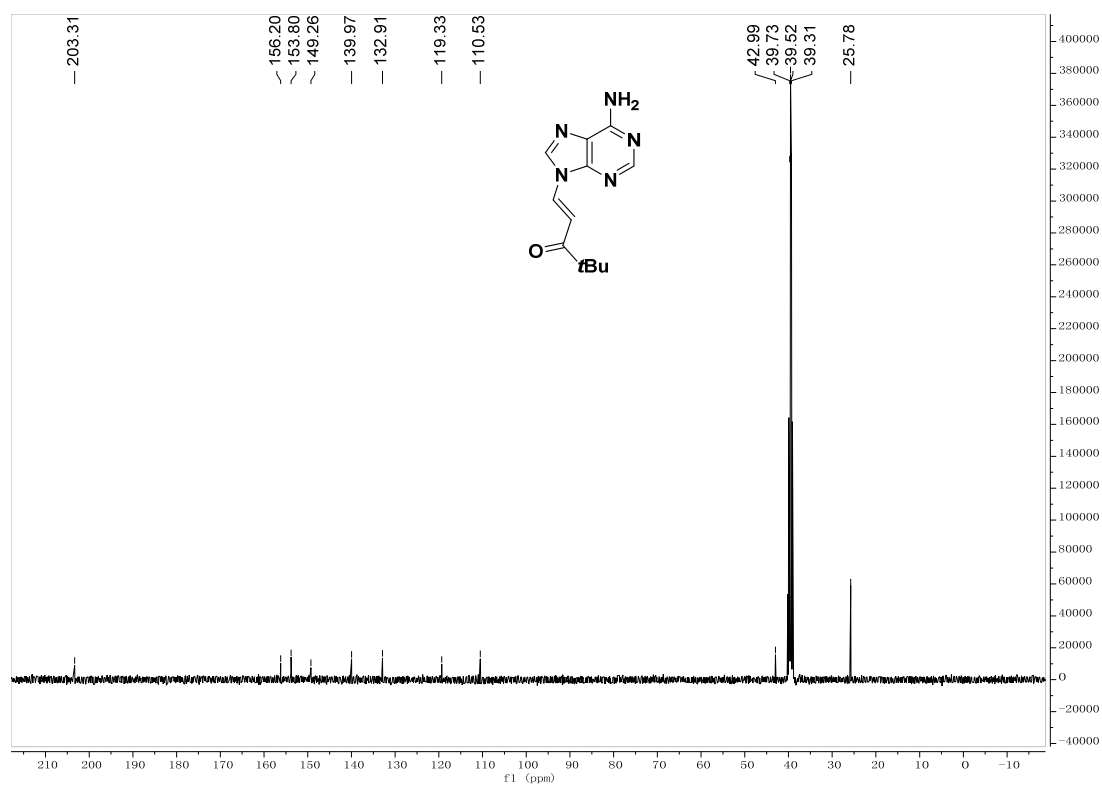

**<sup>1</sup>H NMR of 1h (400 MHz, CDCl<sub>3</sub>)**

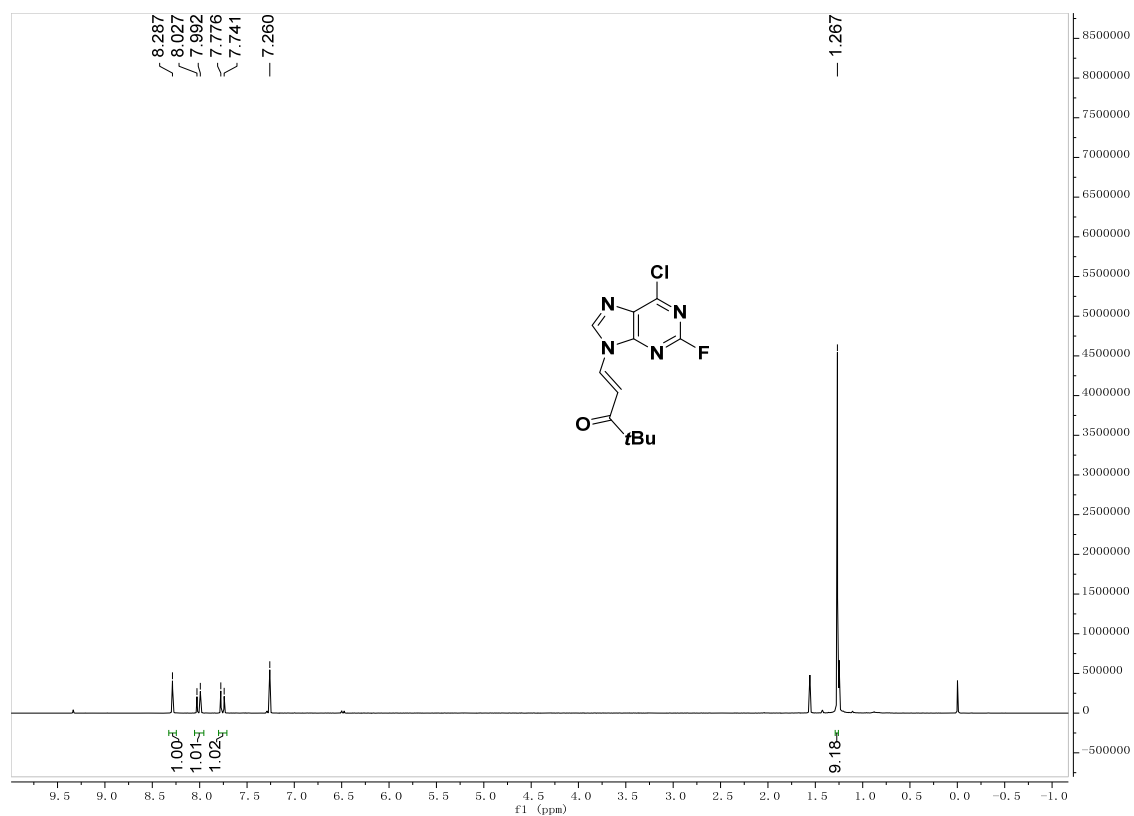

**<sup>13</sup>C NMR of 1h (100 MHz, CDCl<sub>3</sub>)**

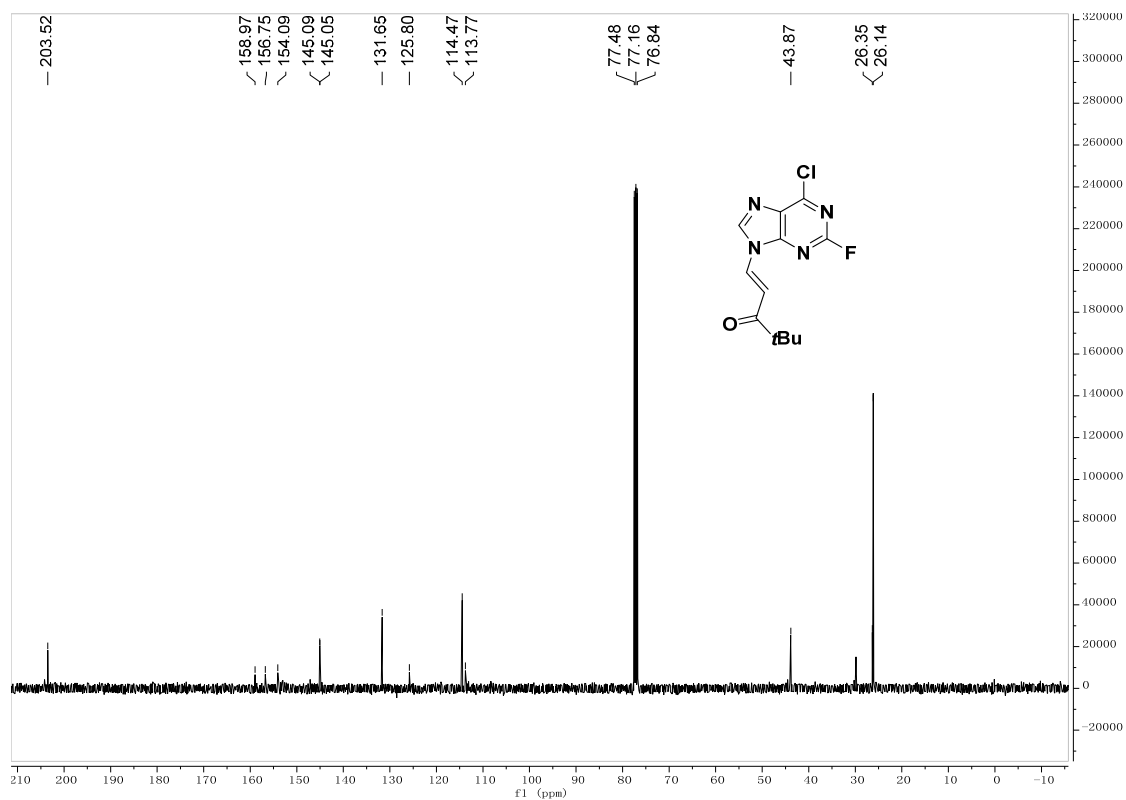

### <sup>1</sup>H NMR of 1i (400 MHz, DMSO-d<sub>6</sub>)

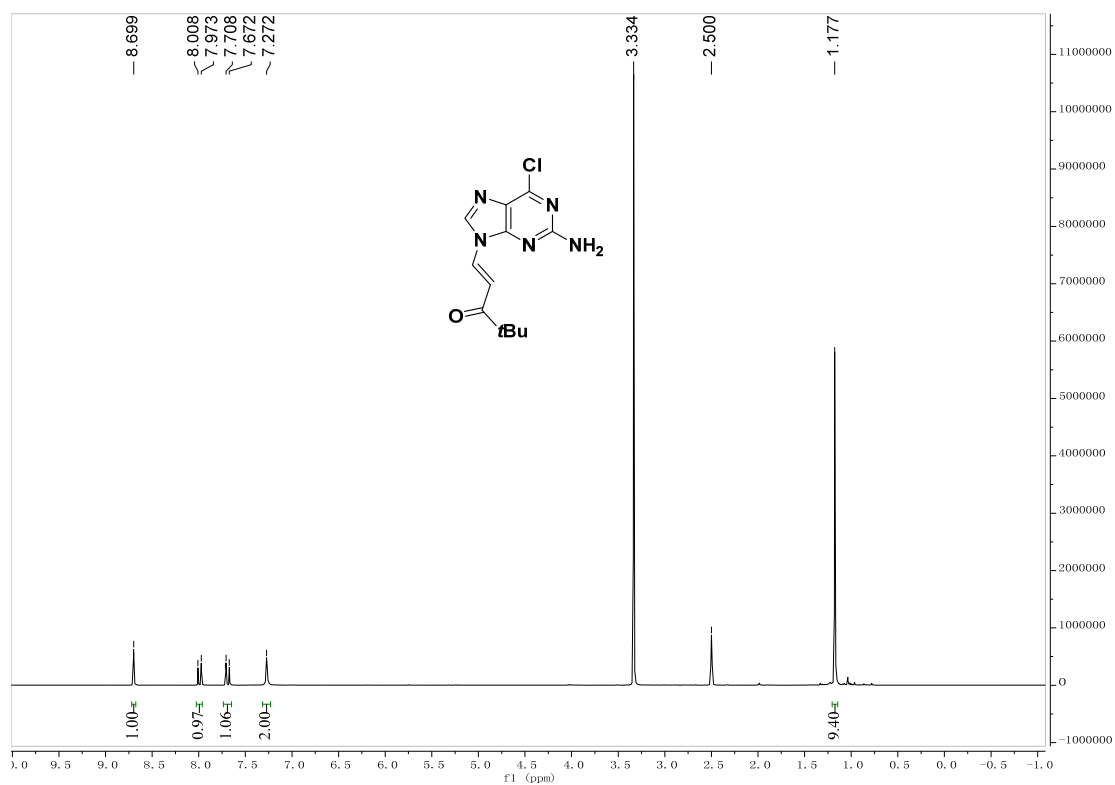

### <sup>13</sup>C NMR of 1i (100 MHz, DMSO-d<sub>6</sub>)

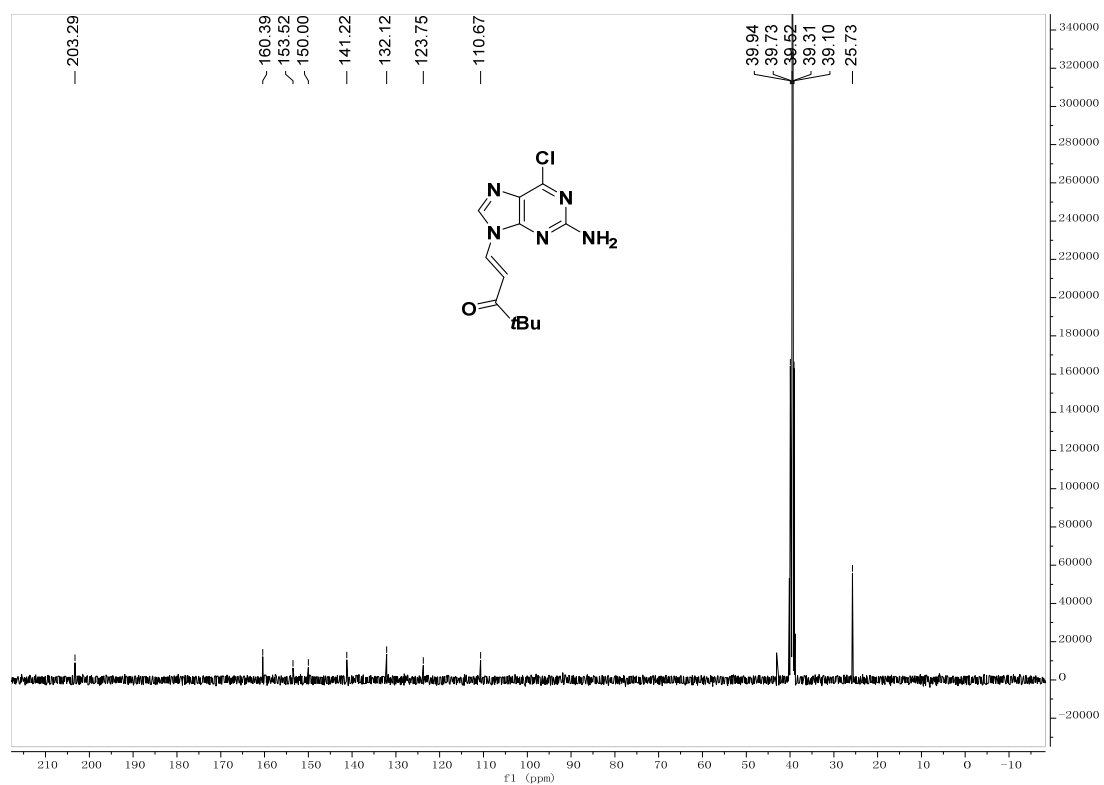

### <sup>1</sup>H NMR of 1j (400 MHz, CDCl<sub>3</sub>)

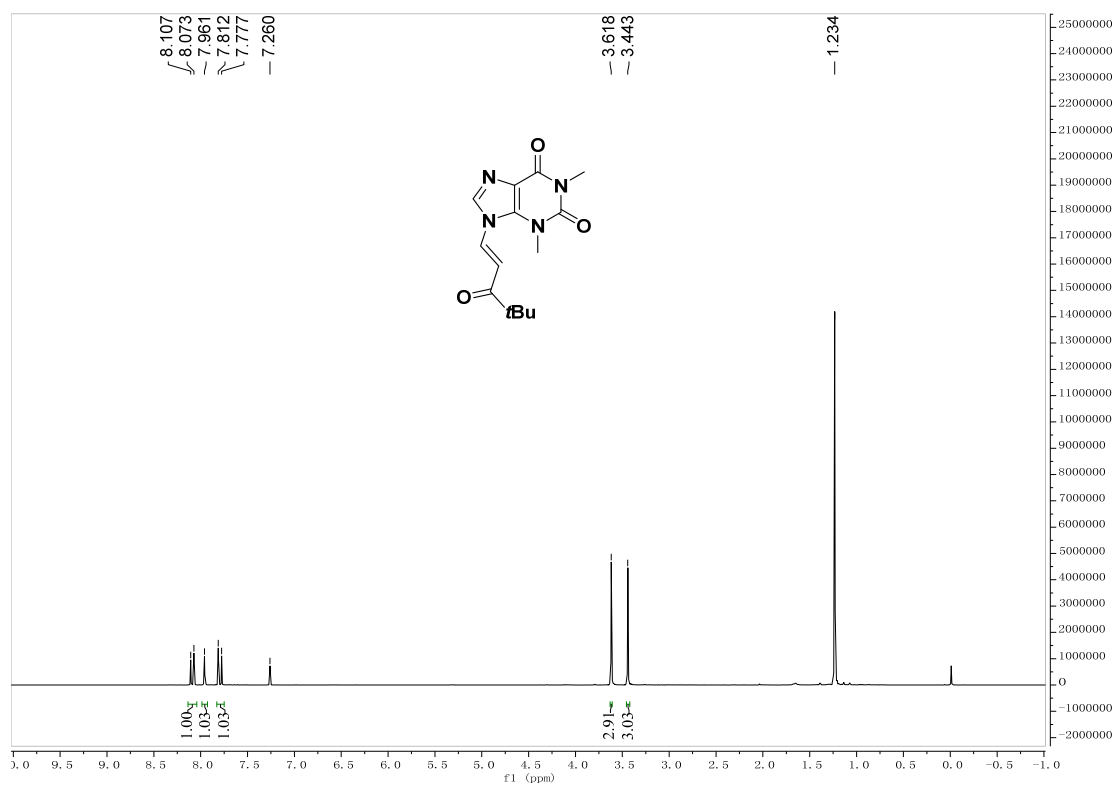

### <sup>13</sup>C NMR of 1j (100 MHz, CDCl<sub>3</sub>)

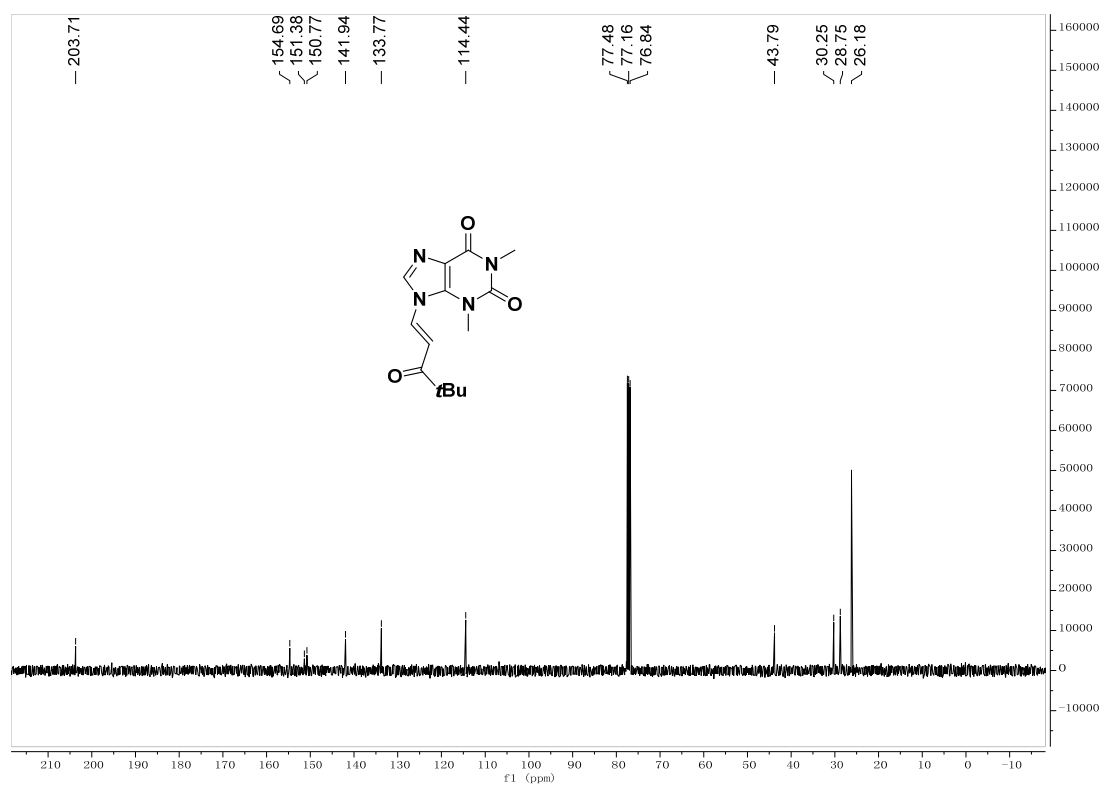

### <sup>1</sup>H NMR of 1k (400 MHz, CDCl<sub>3</sub>)

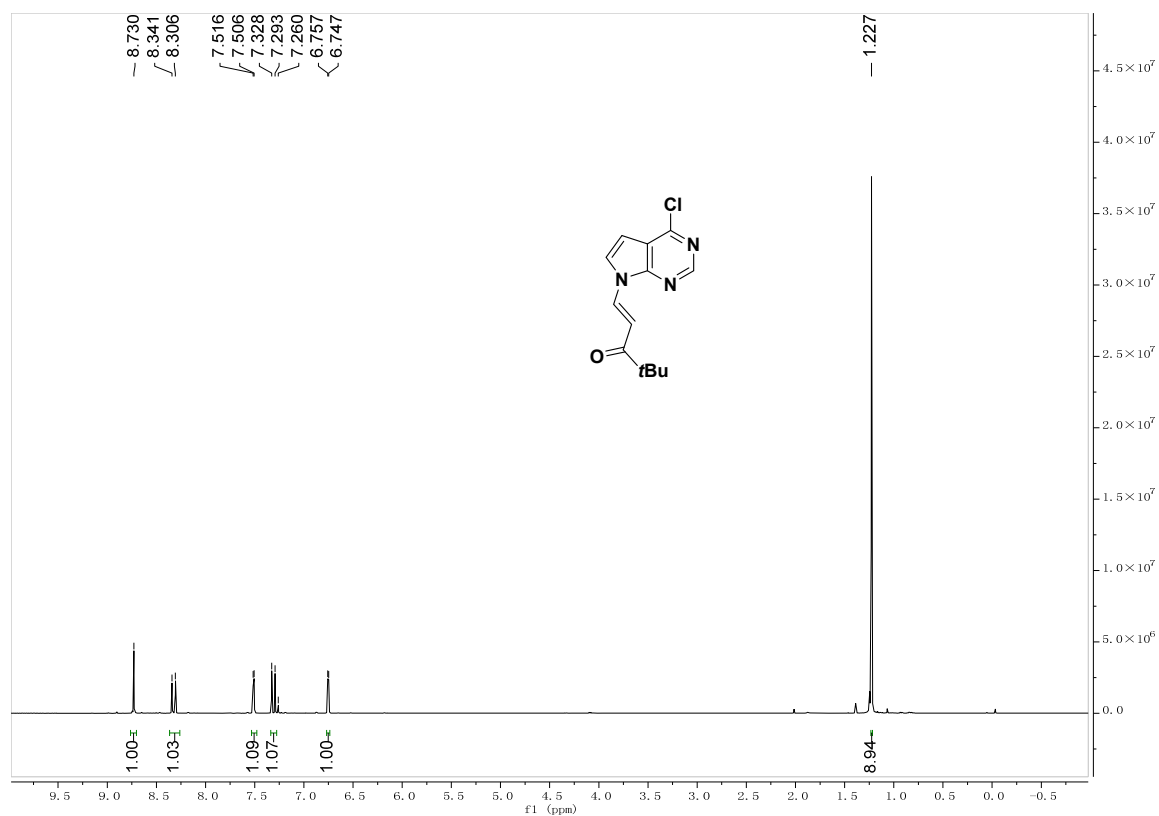

### <sup>13</sup>C NMR of 1k (100 MHz, CDCl<sub>3</sub>)

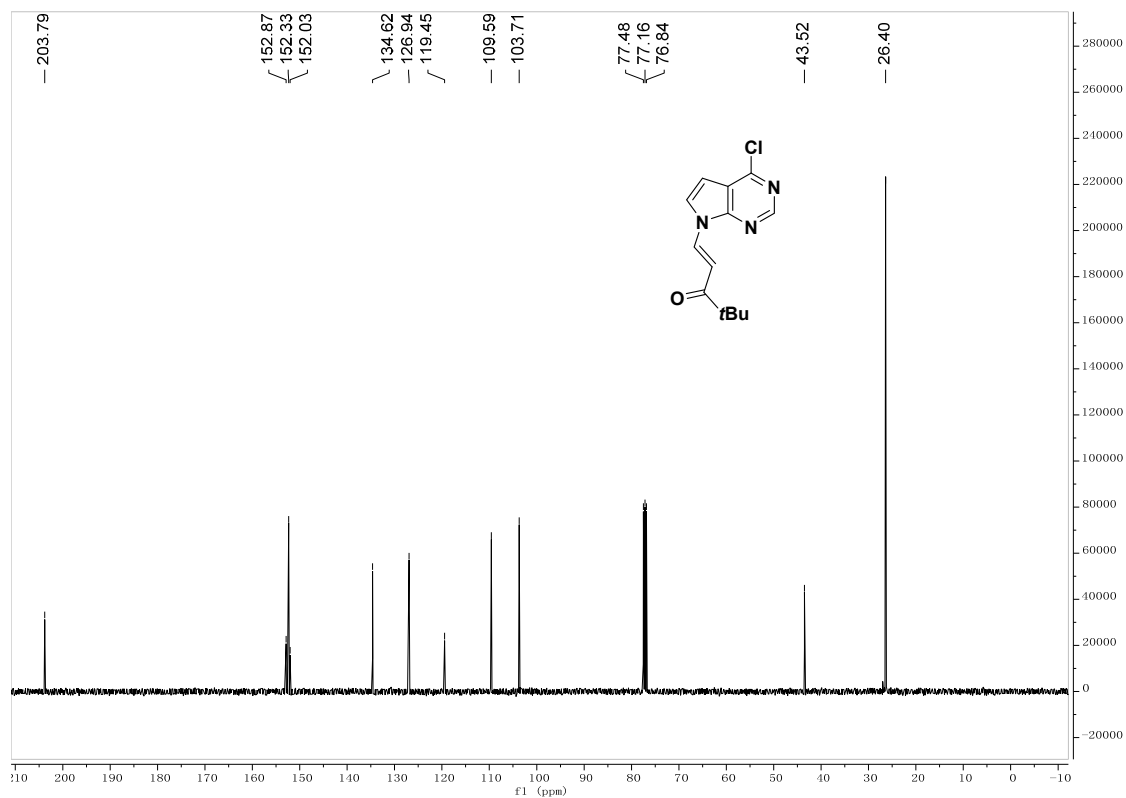

### <sup>1</sup>H NMR of 11 (600 MHz, CDCl<sub>3</sub>)

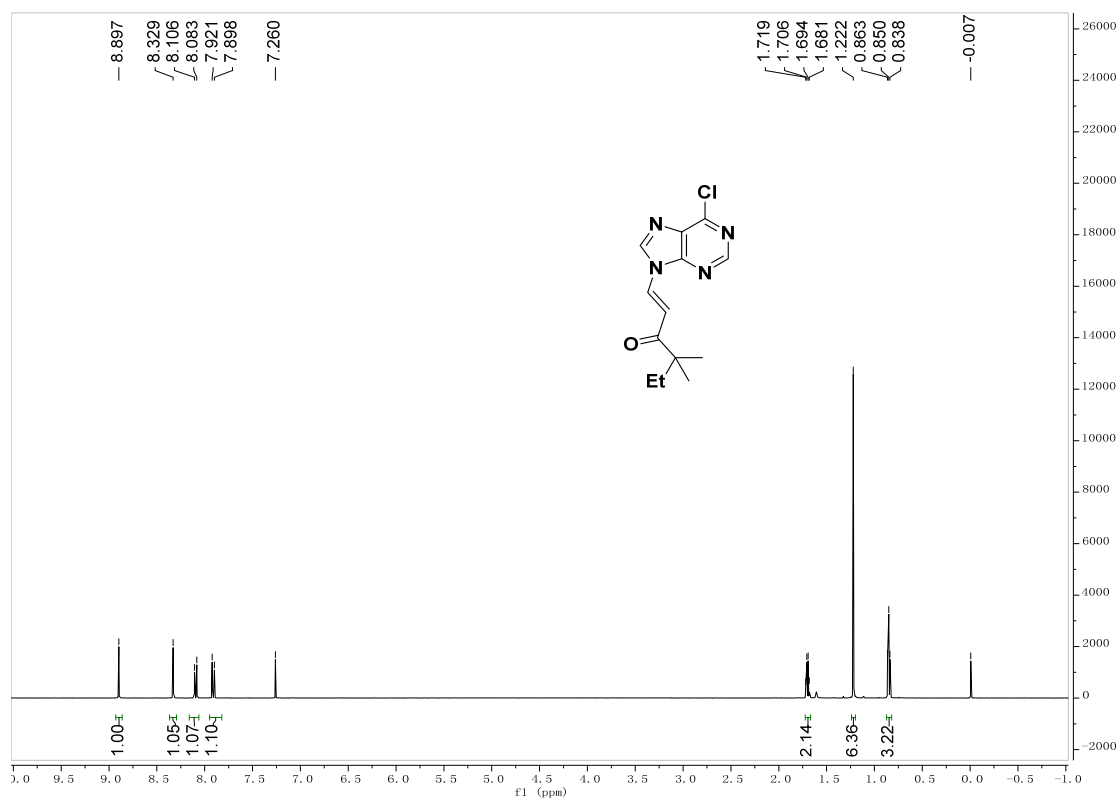

### <sup>13</sup>C NMR of 11 (150 MHz, CDCl<sub>3</sub>)

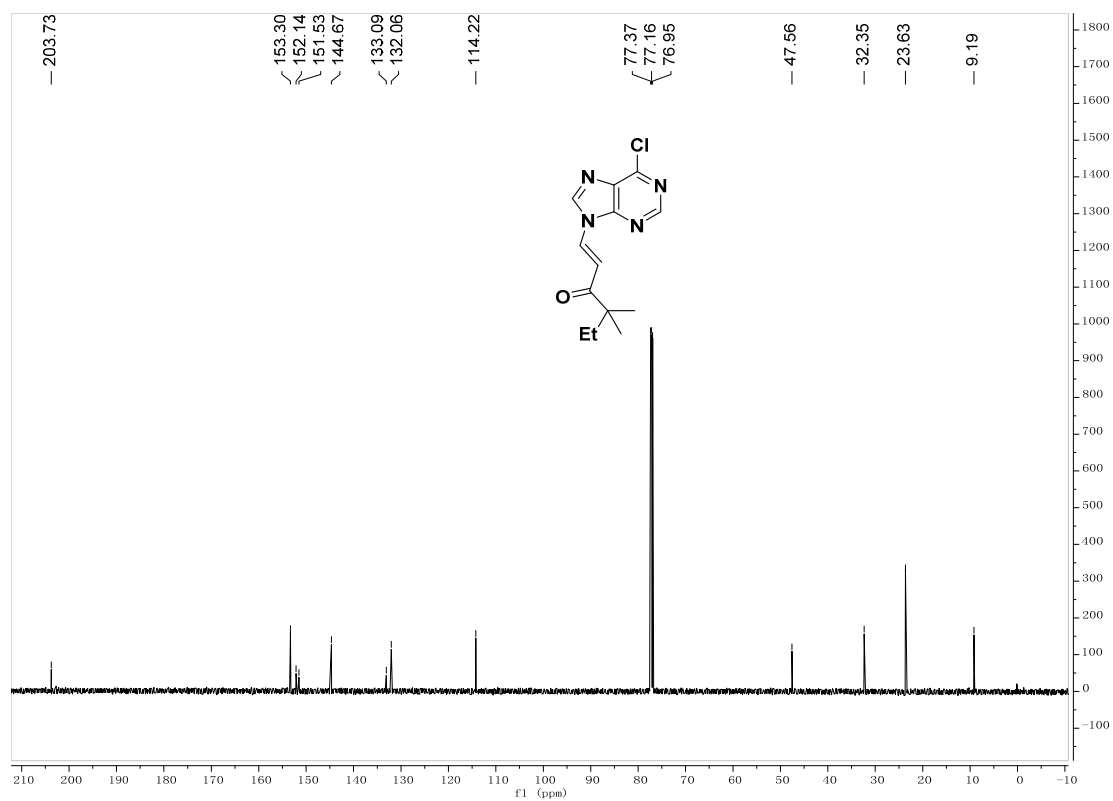

### <sup>1</sup>H NMR of 1m (600 MHz, CDCl<sub>3</sub>)

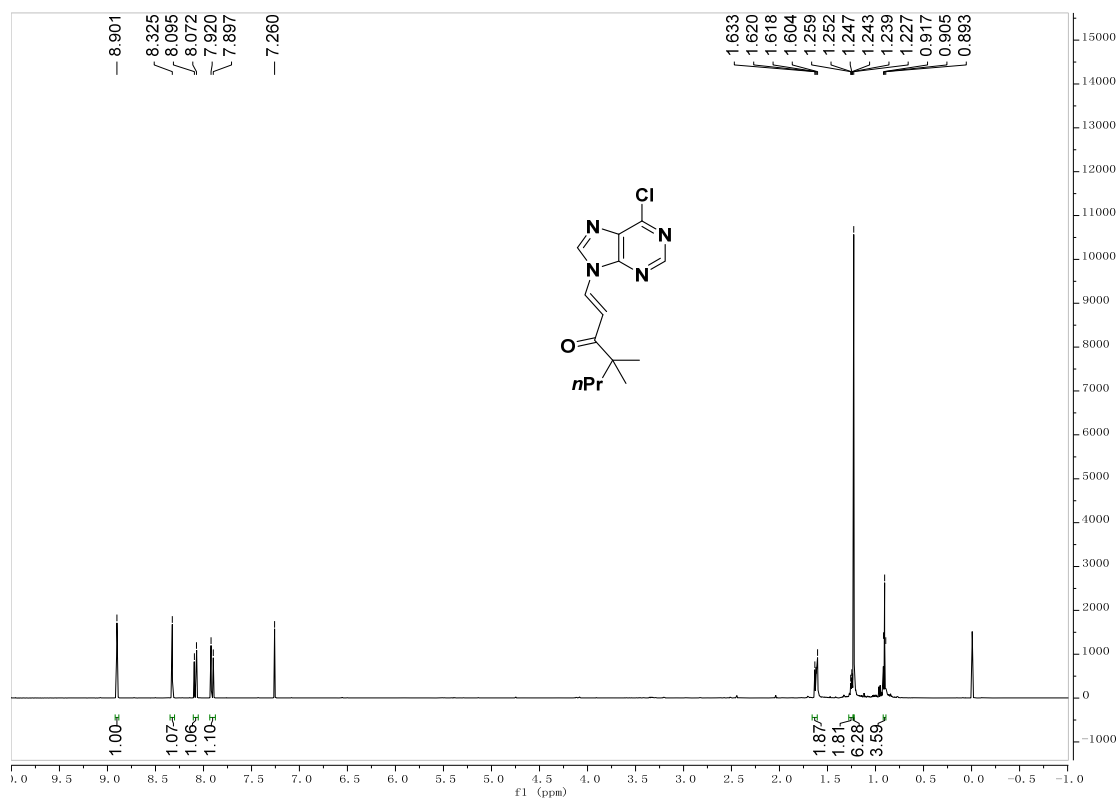

### <sup>13</sup>C NMR of 1m (150 MHz, CDCl<sub>3</sub>)

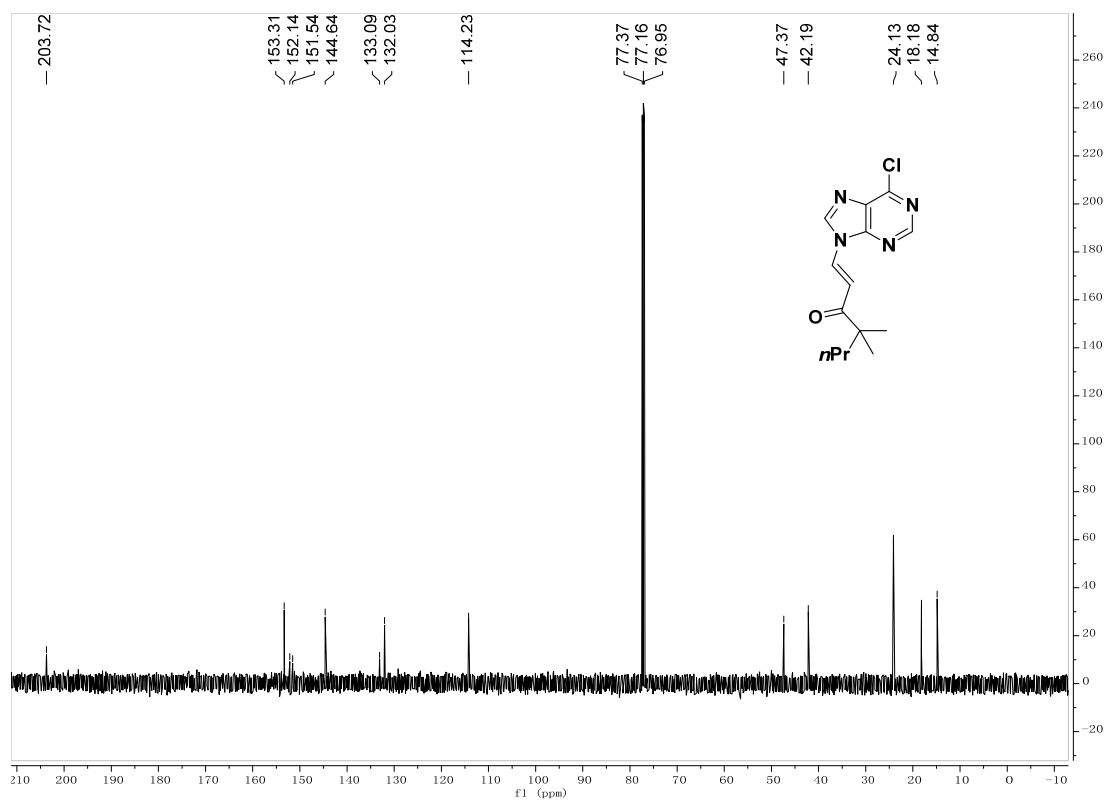

### <sup>1</sup>H NMR of 1n (600 MHz, CDCl<sub>3</sub>)

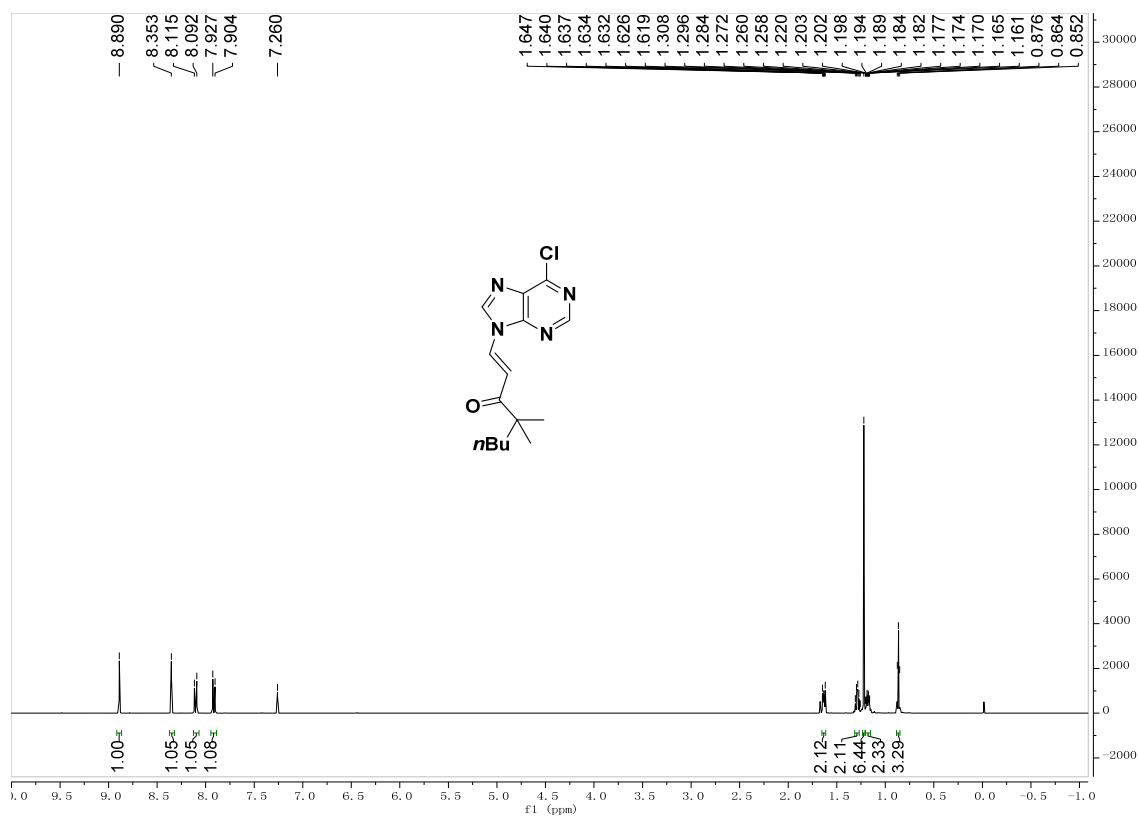

### <sup>13</sup>C NMR of 1n (150 MHz, CDCl<sub>3</sub>)

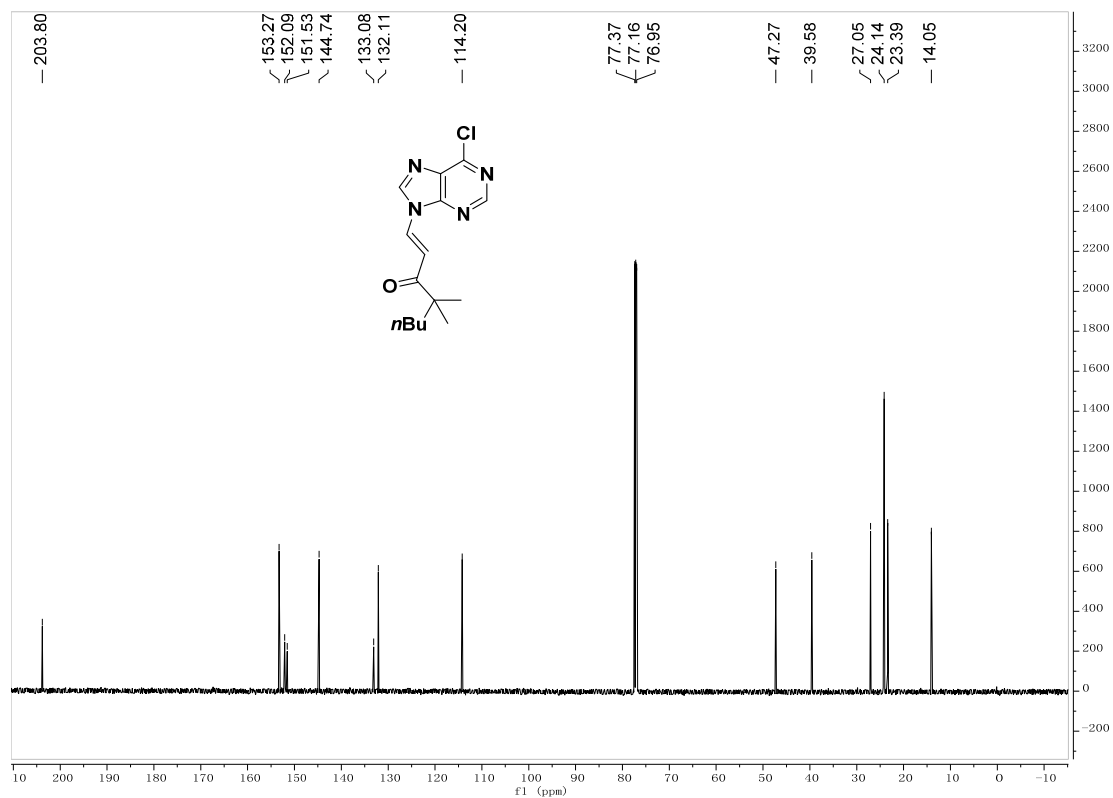



### <sup>1</sup>H NMR of **1o** (600 MHz, CDCl<sub>3</sub>)

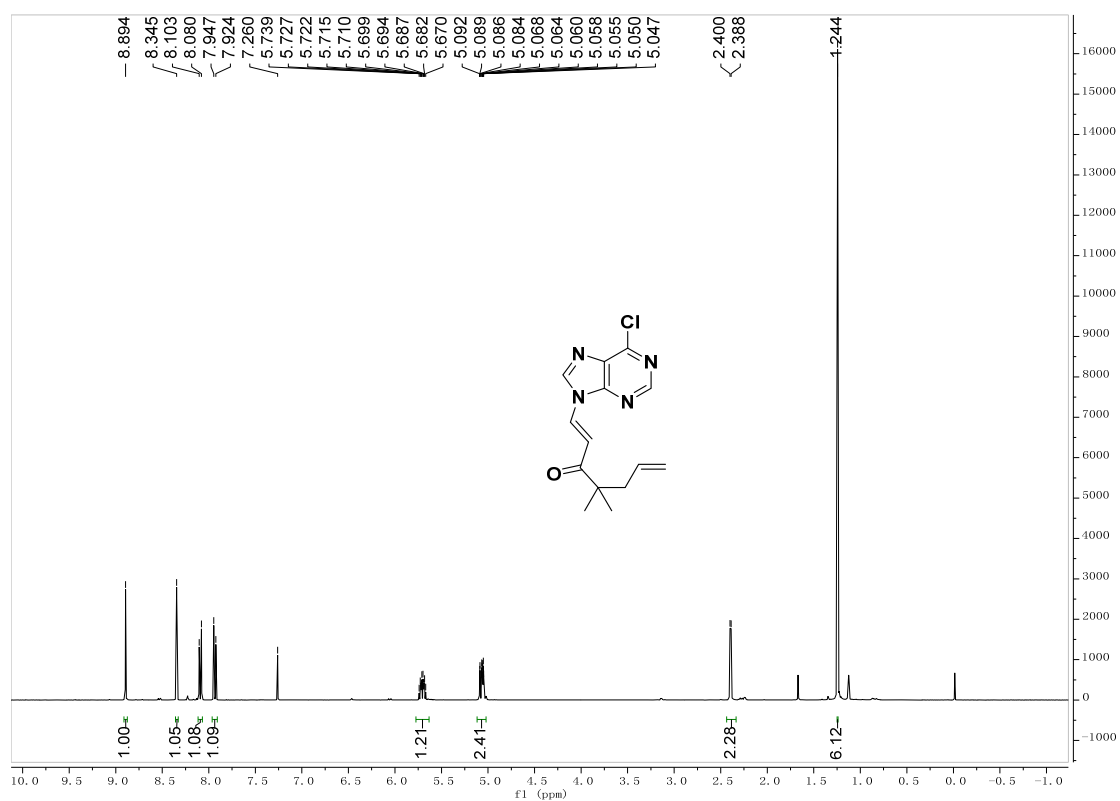

### <sup>13</sup>C NMR of **1o** (150 MHz, CDCl<sub>3</sub>)

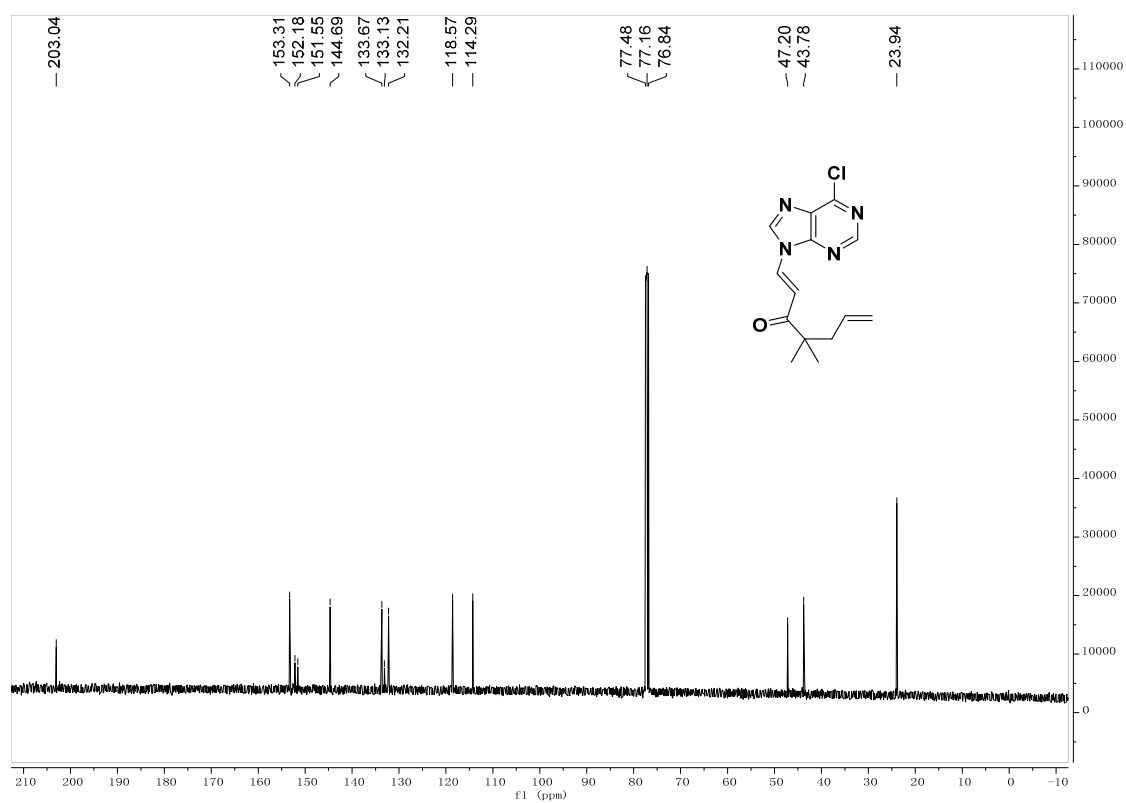

### <sup>1</sup>H NMR of 1p (400 MHz, CDCl<sub>3</sub>)

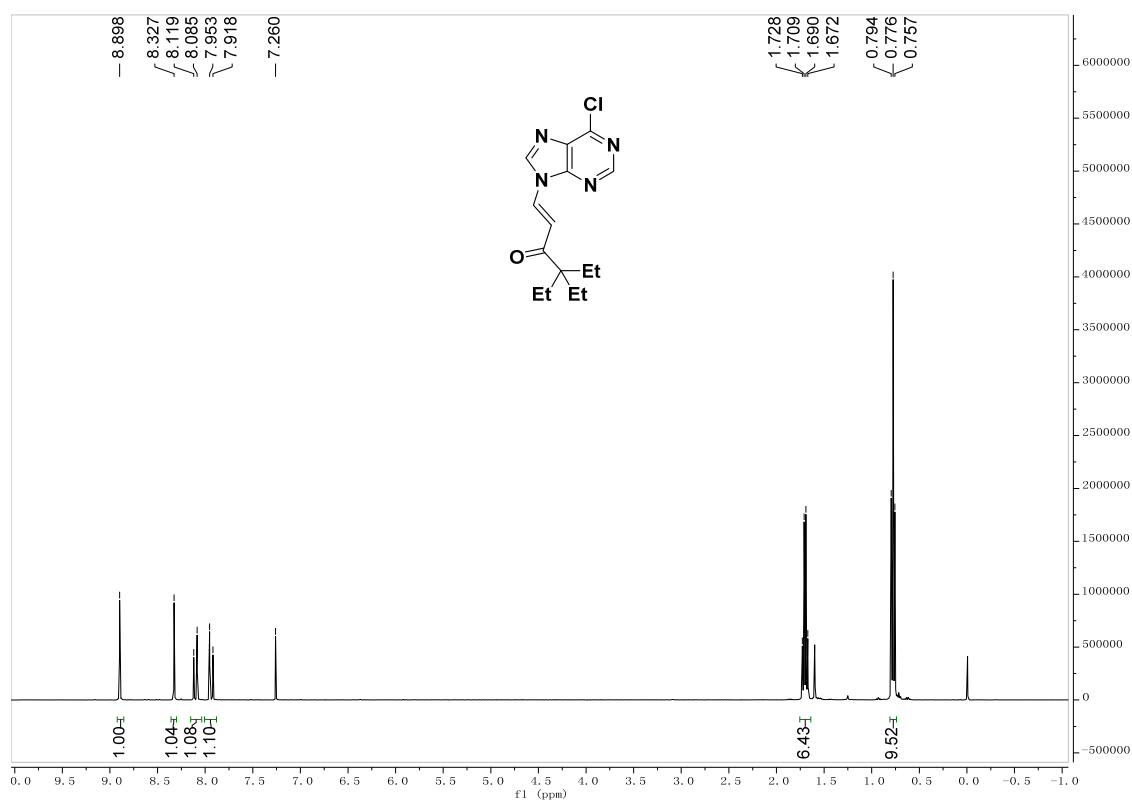

### <sup>13</sup>C NMR of 1p (100 MHz, CDCl<sub>3</sub>)

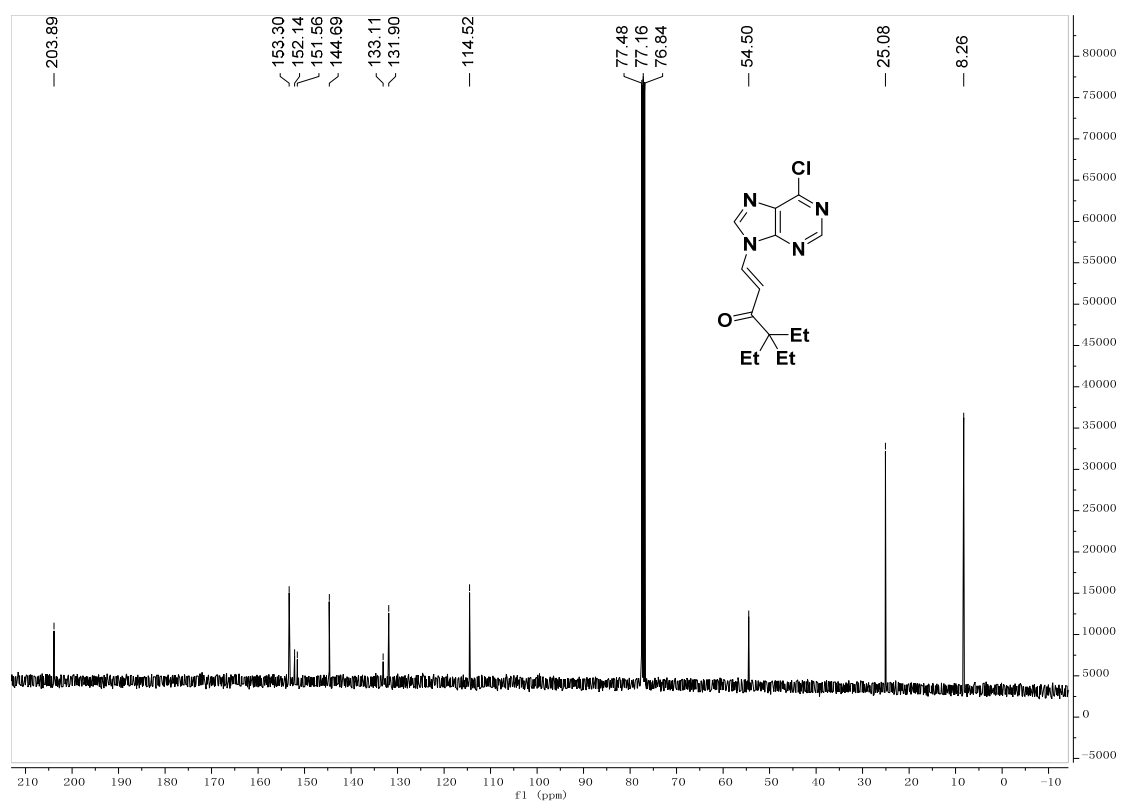

### <sup>1</sup>H NMR of 1q (600 MHz, CDCl<sub>3</sub>)

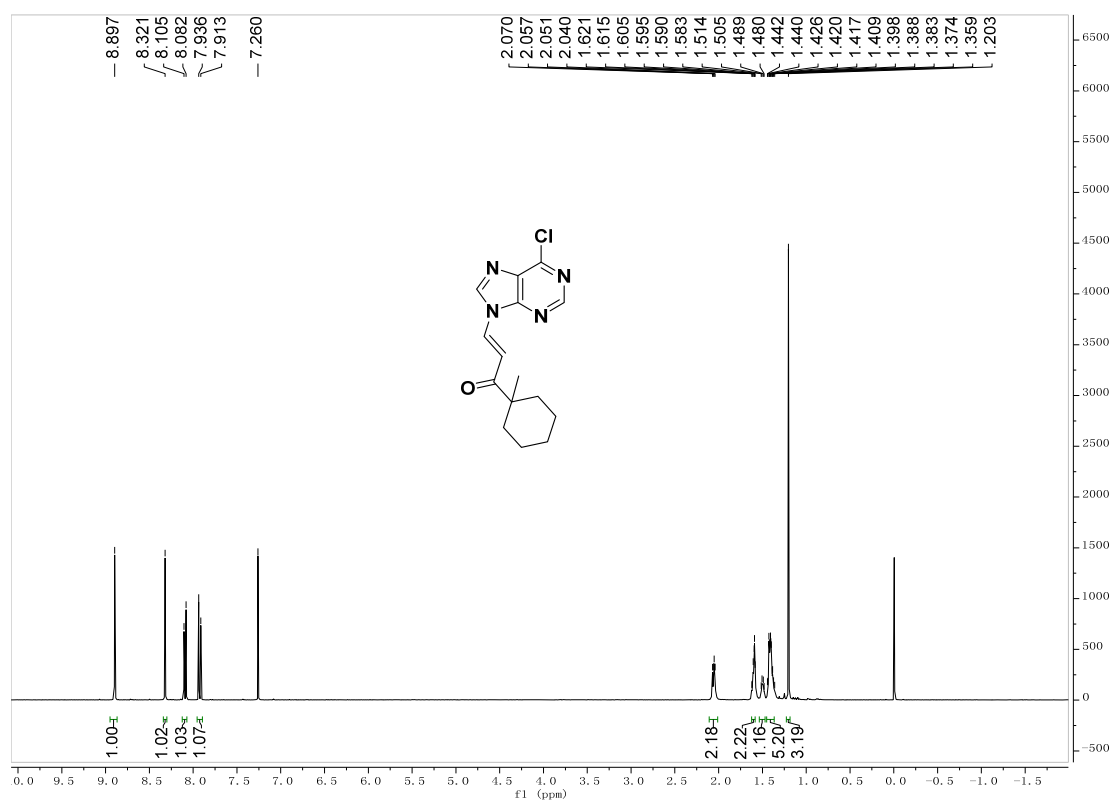

### <sup>13</sup>C NMR of 1q (150 MHz, CDCl<sub>3</sub>)

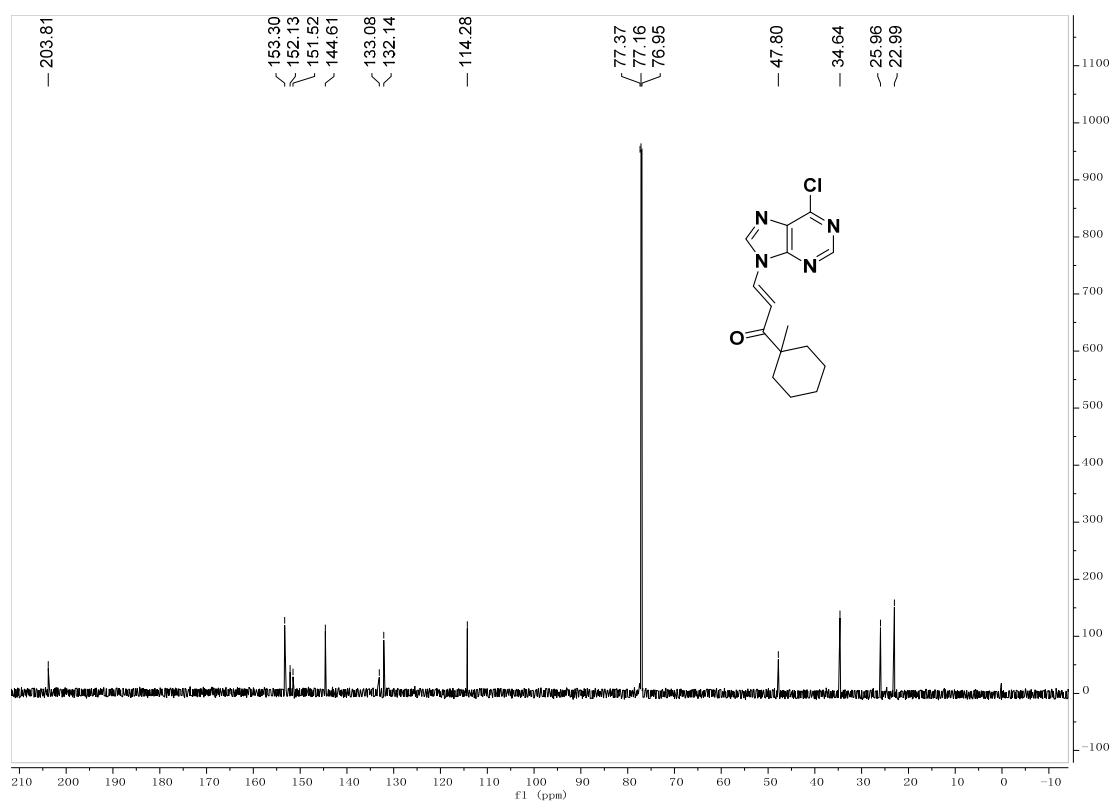

### <sup>1</sup>H NMR of 1r (400 MHz, CDCl<sub>3</sub>)

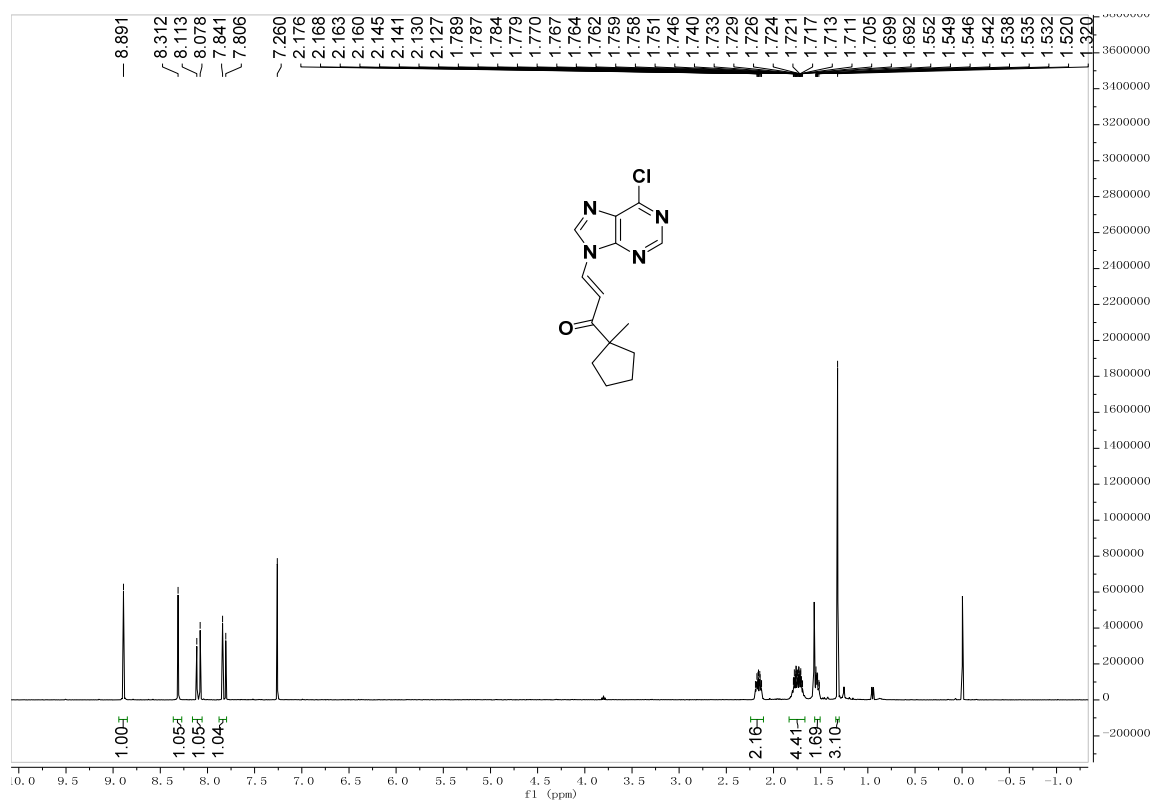

### <sup>13</sup>C NMR of 1r (100 MHz, CDCl<sub>3</sub>)

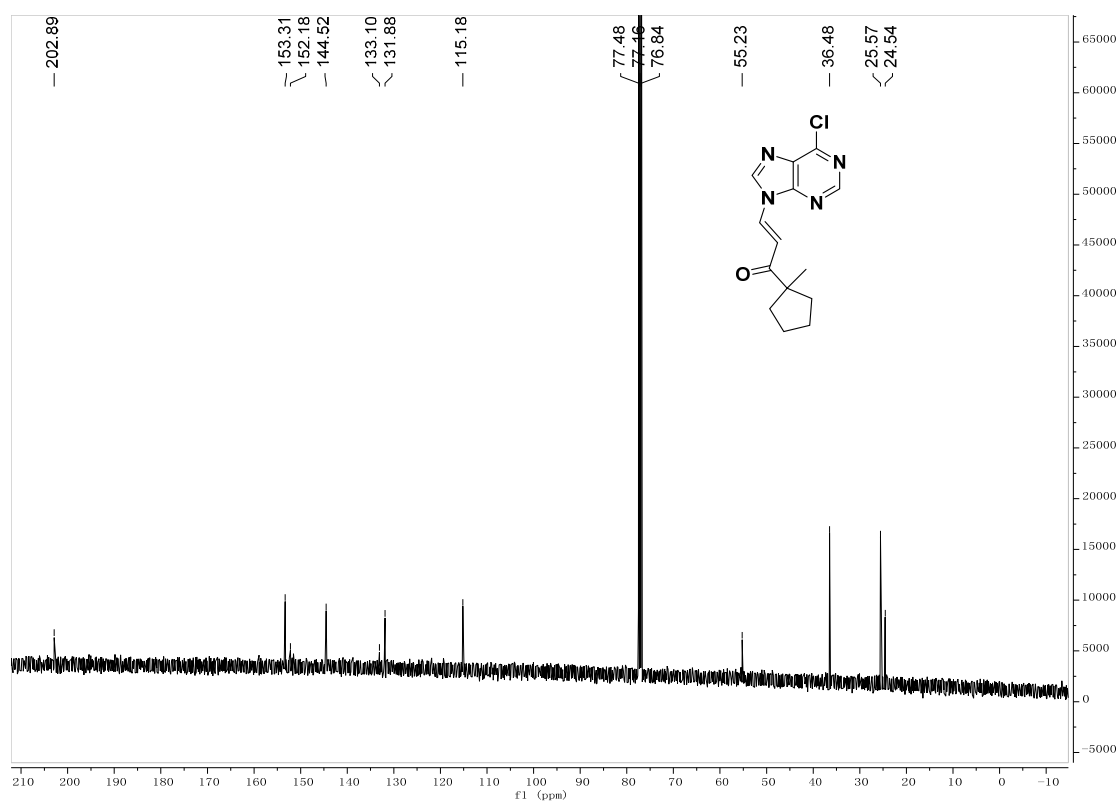

**<sup>1</sup>H NMR of 1s (600 MHz, CDCl<sub>3</sub>)**

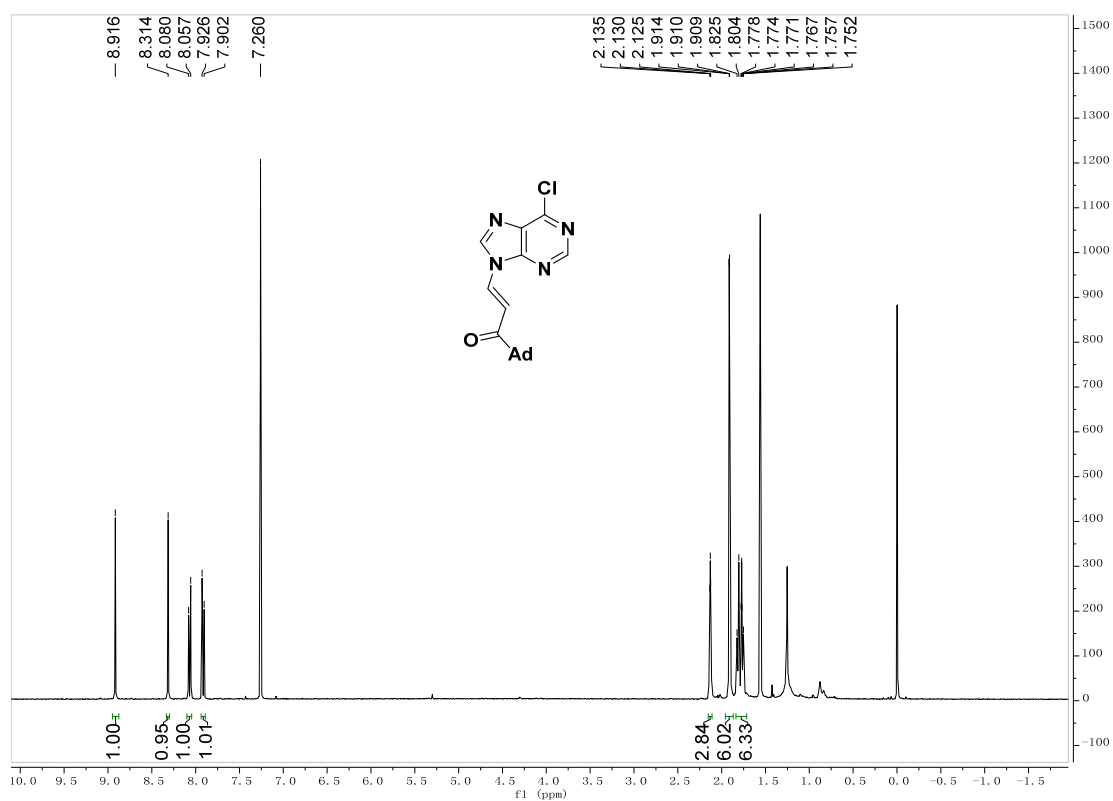

**<sup>13</sup>C NMR of 1s (150 MHz, CDCl<sub>3</sub>)**

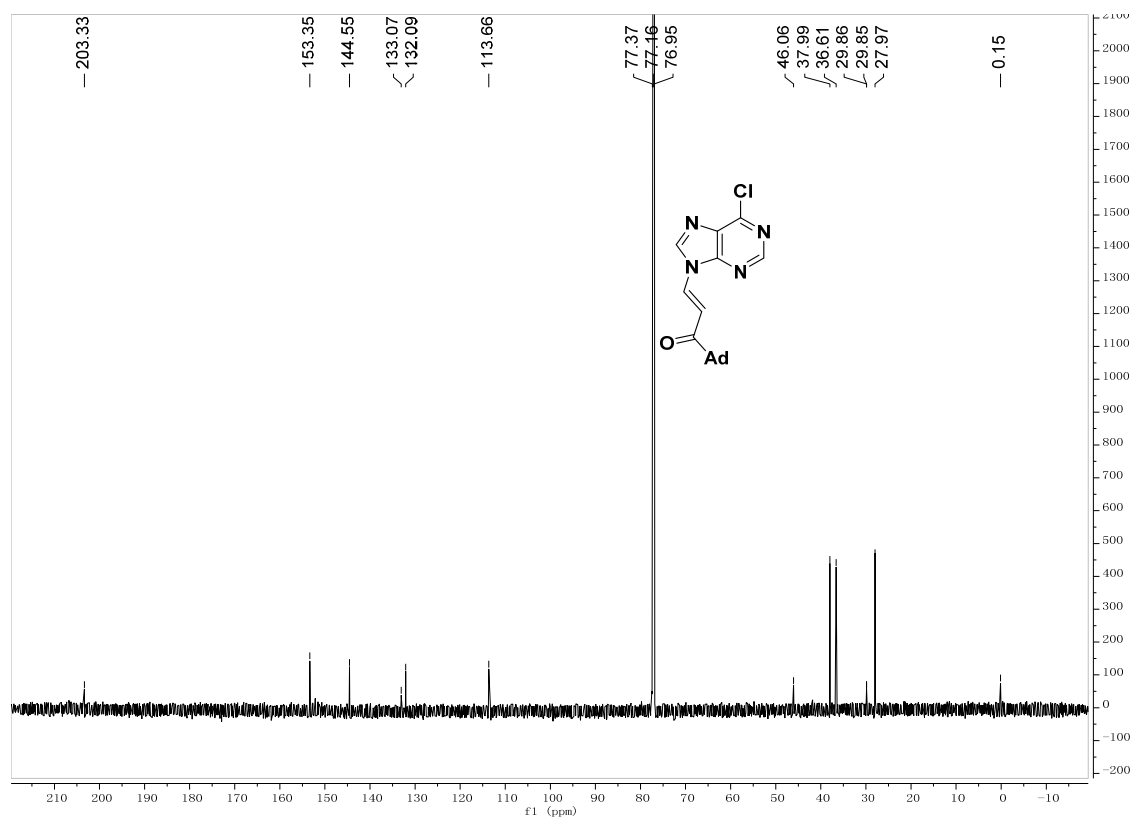

### <sup>1</sup>H NMR of 1t (600 MHz, CDCl<sub>3</sub>)

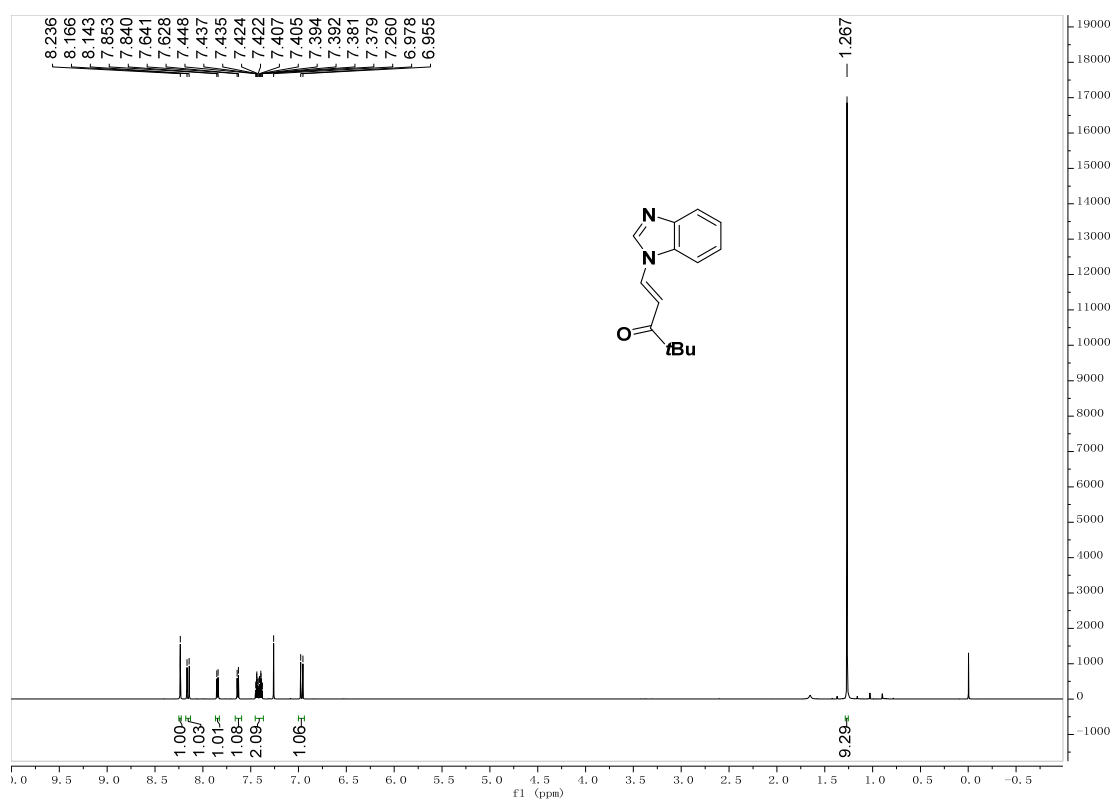

### <sup>13</sup>C NMR of 1t (150 MHz, CDCl<sub>3</sub>)

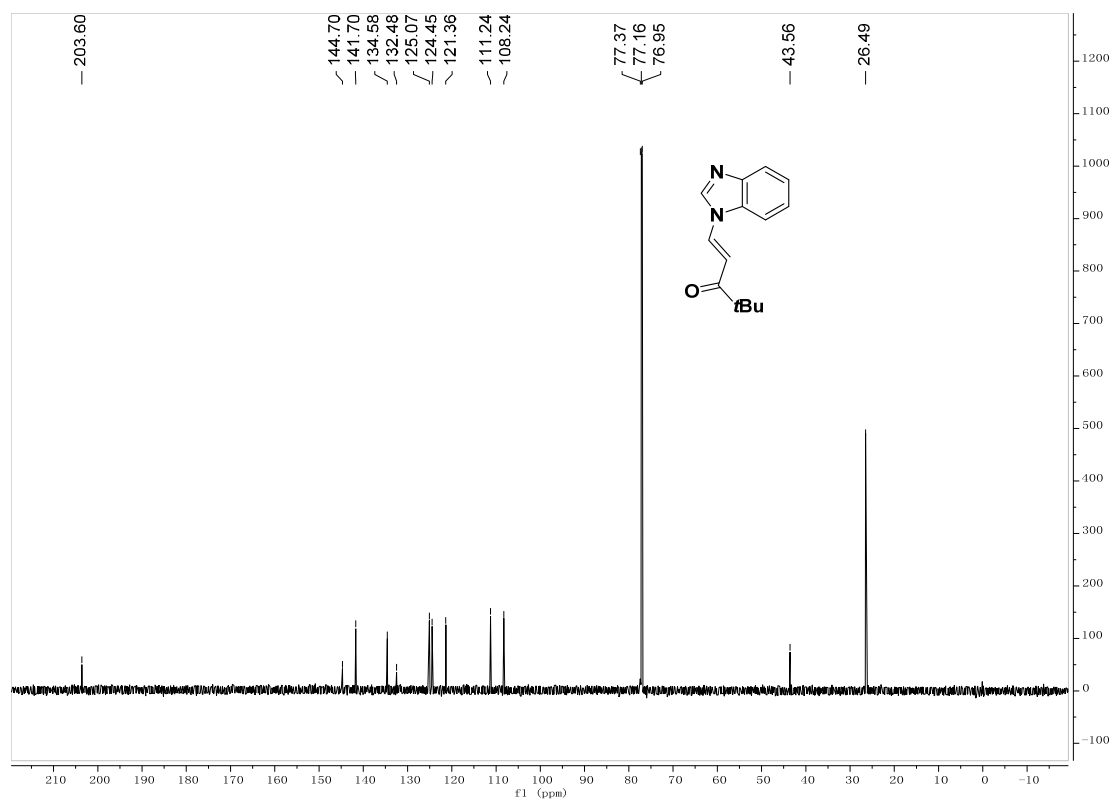

### <sup>1</sup>H NMR of **1u** (600 MHz, CDCl<sub>3</sub>)

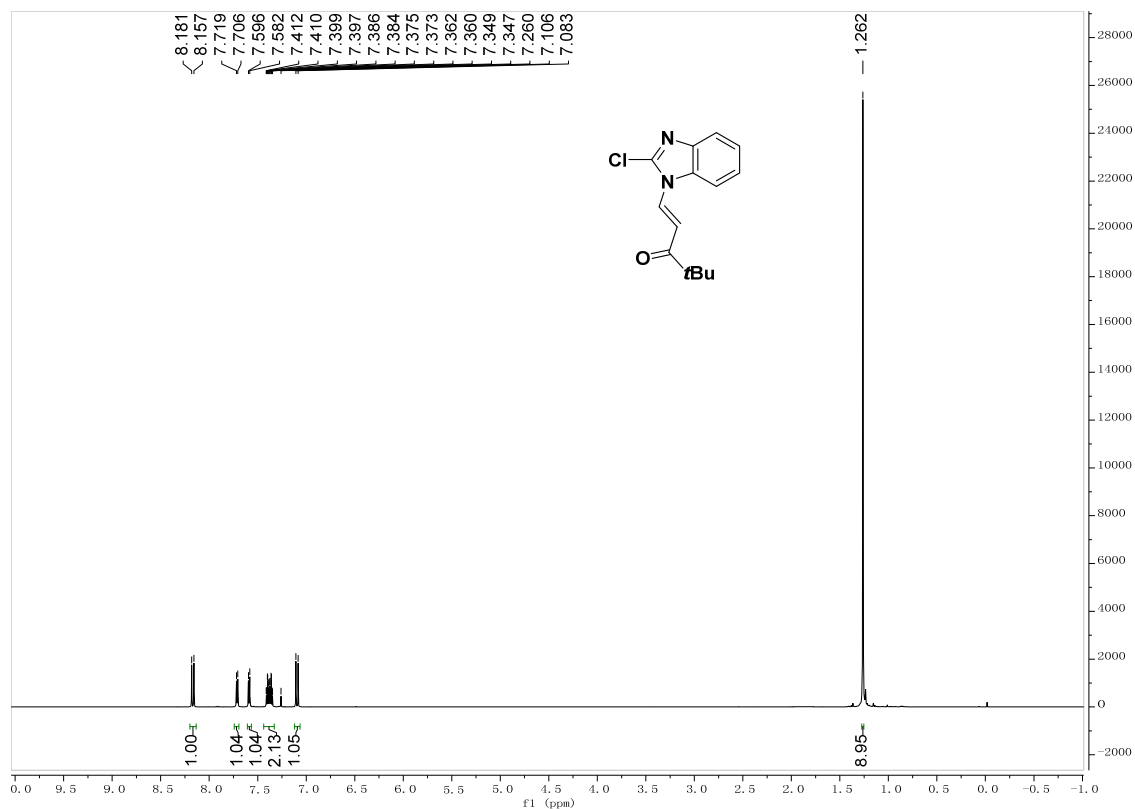

### <sup>13</sup>C NMR of **1u** (150 MHz, CDCl<sub>3</sub>)

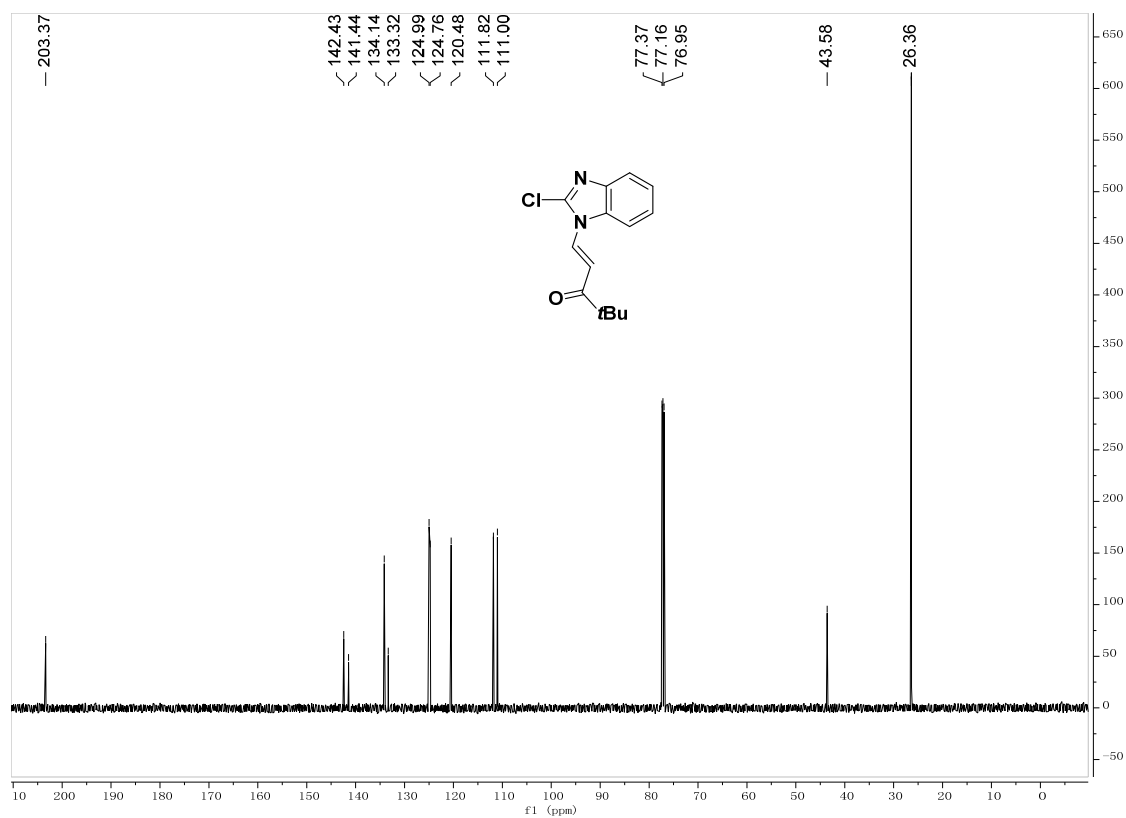

### <sup>1</sup>H NMR of 1v (400 MHz, CDCl<sub>3</sub>)

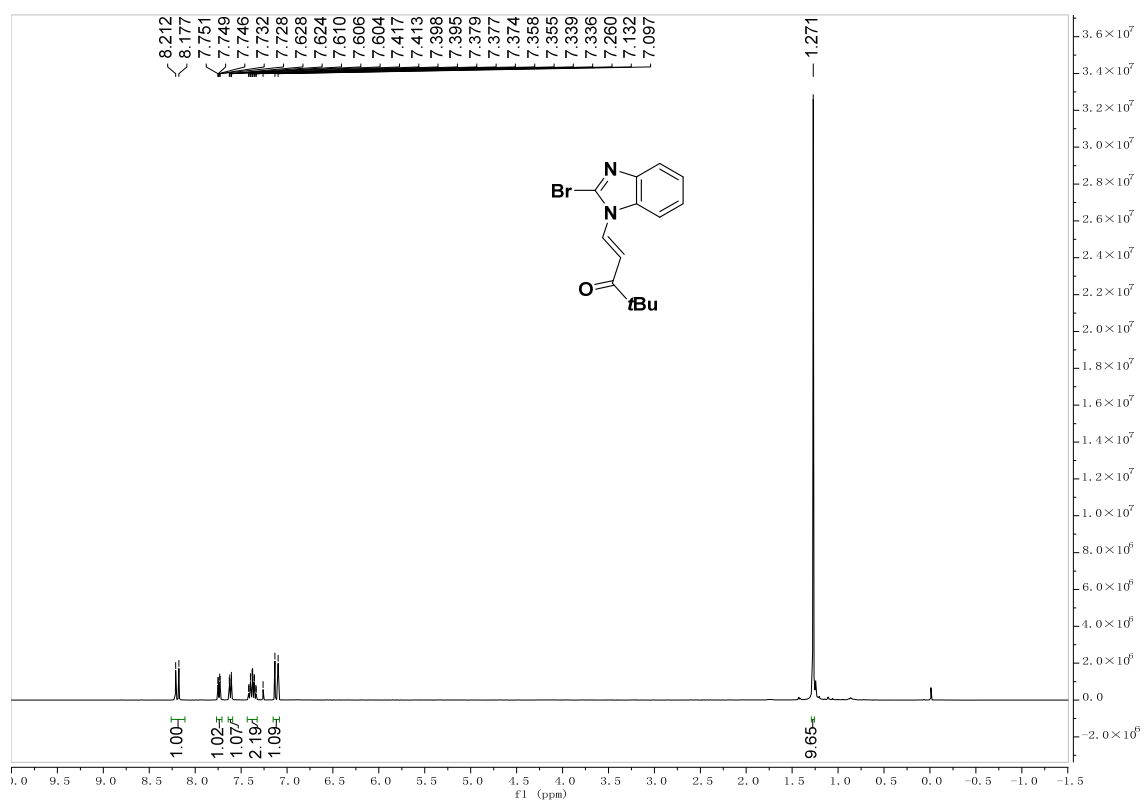

### <sup>13</sup>C NMR of 1v (100 MHz, CDCl<sub>3</sub>)

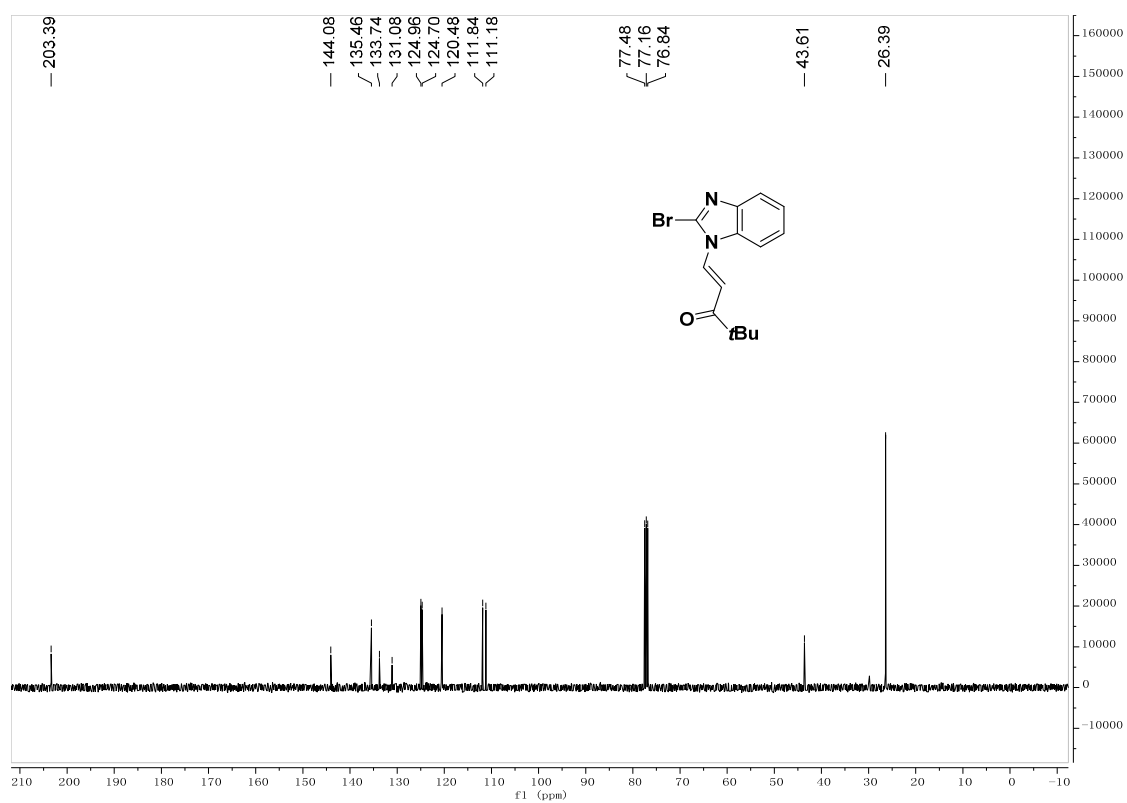



**<sup>1</sup>H NMR of 1w (400 MHz, CDCl<sub>3</sub>)**

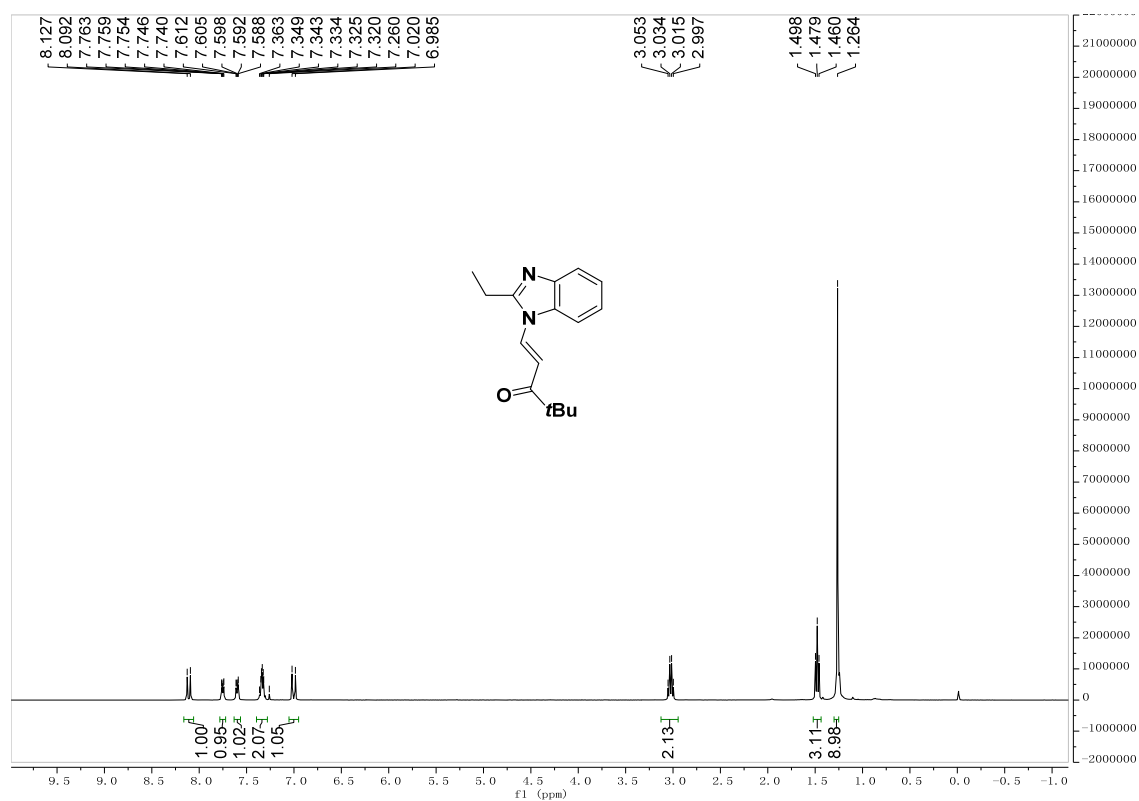

**<sup>13</sup>C NMR of 1w (100 MHz, CDCl<sub>3</sub>)**

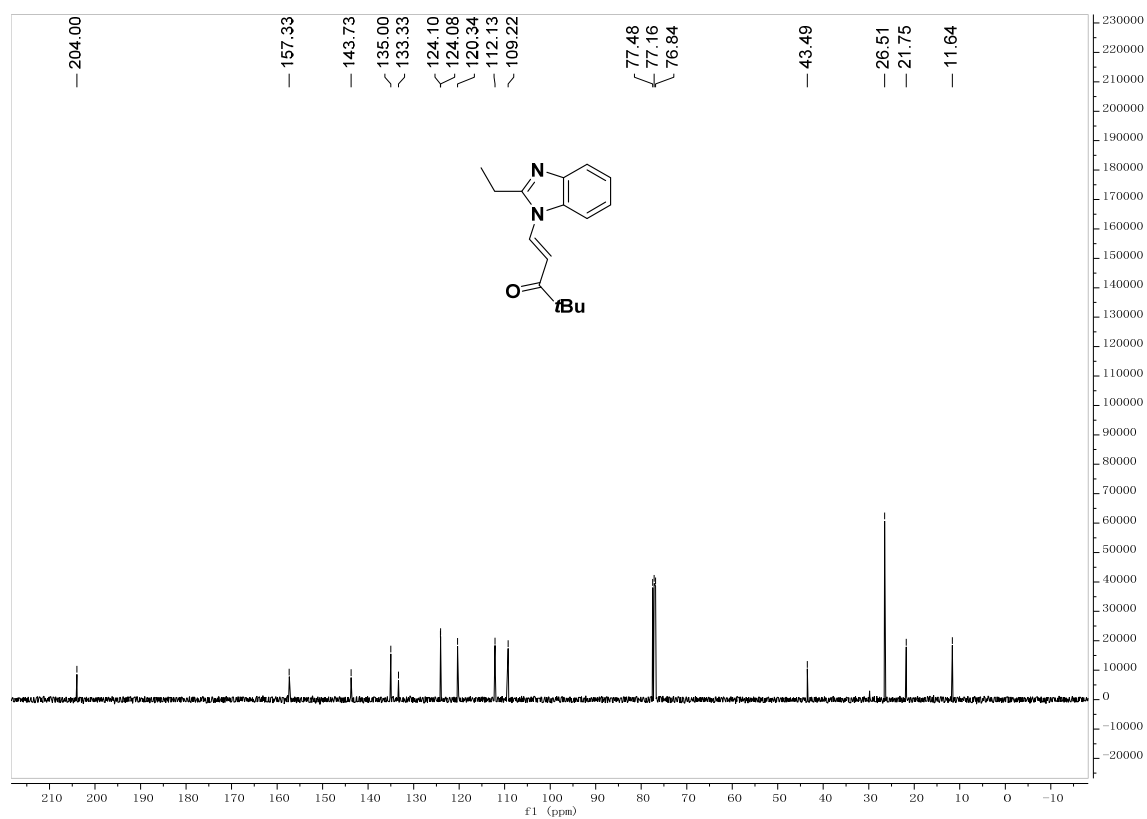

### <sup>1</sup>H NMR of 1x (600 MHz, CDCl<sub>3</sub>)

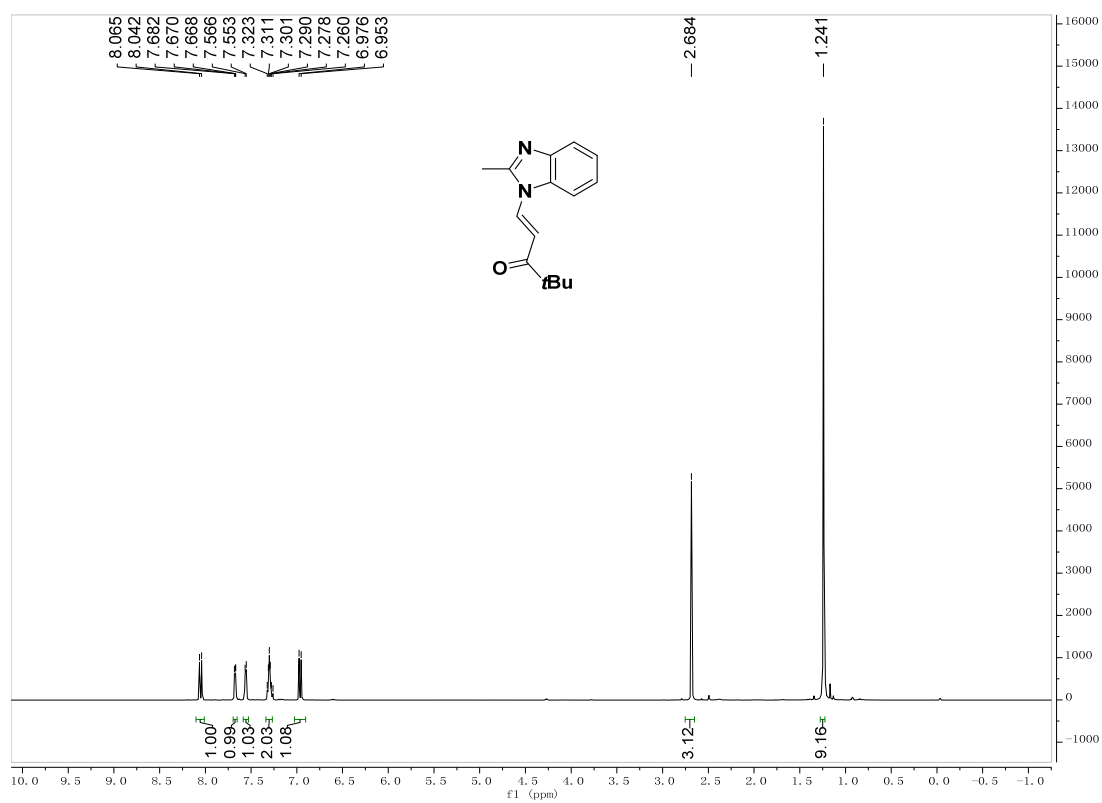

### <sup>13</sup>C NMR of 1x (150 MHz, CDCl<sub>3</sub>)

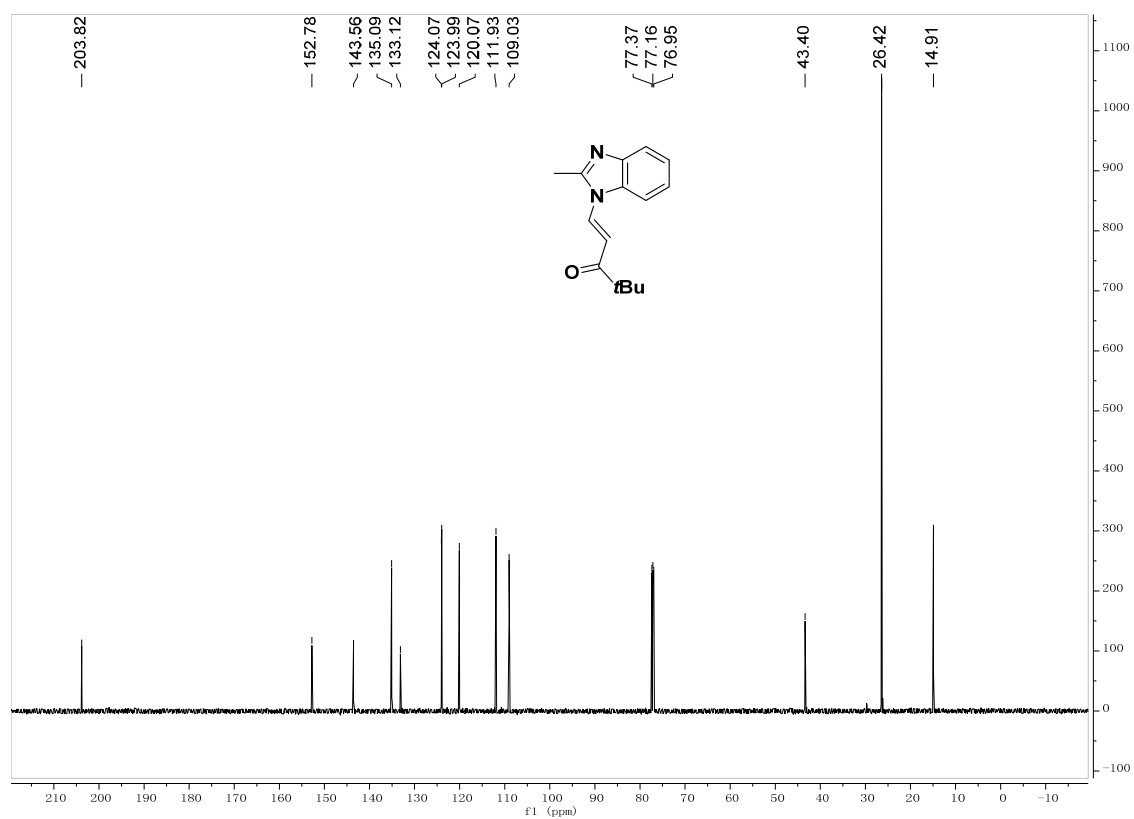

**<sup>1</sup>H NMR of 1y (600 MHz, CDCl<sub>3</sub>)**

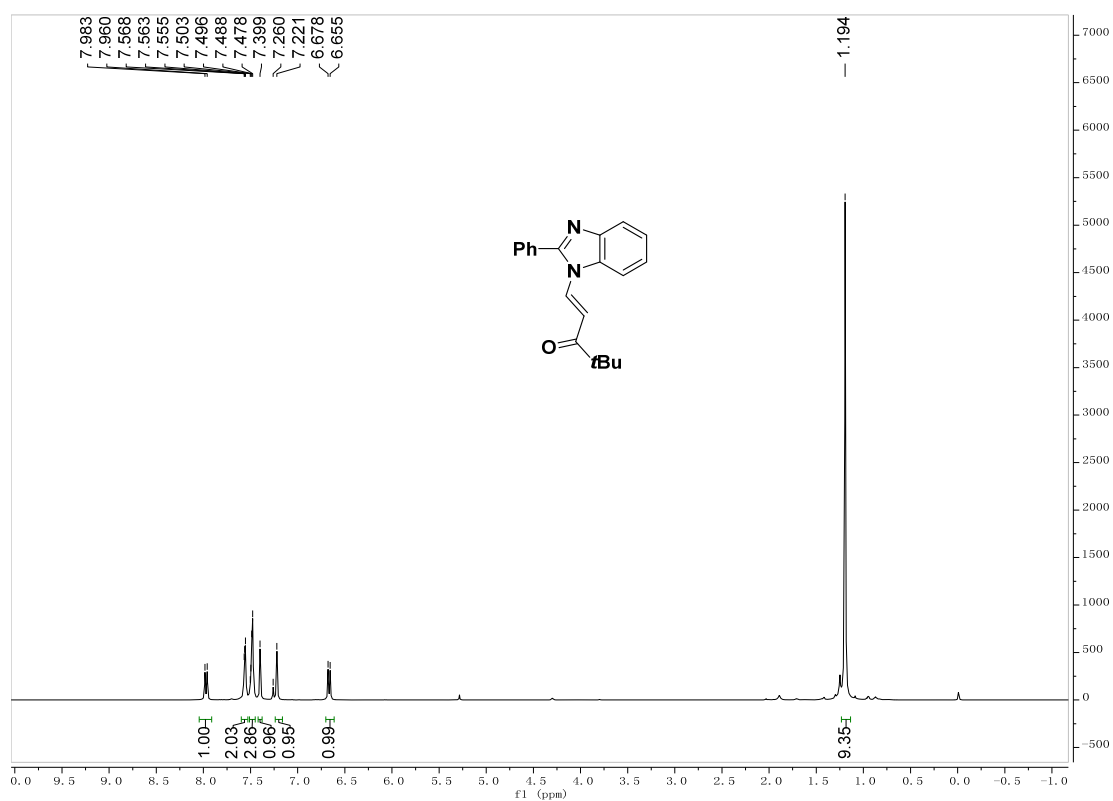

**<sup>13</sup>C NMR of 1y (150 MHz, CDCl<sub>3</sub>)**

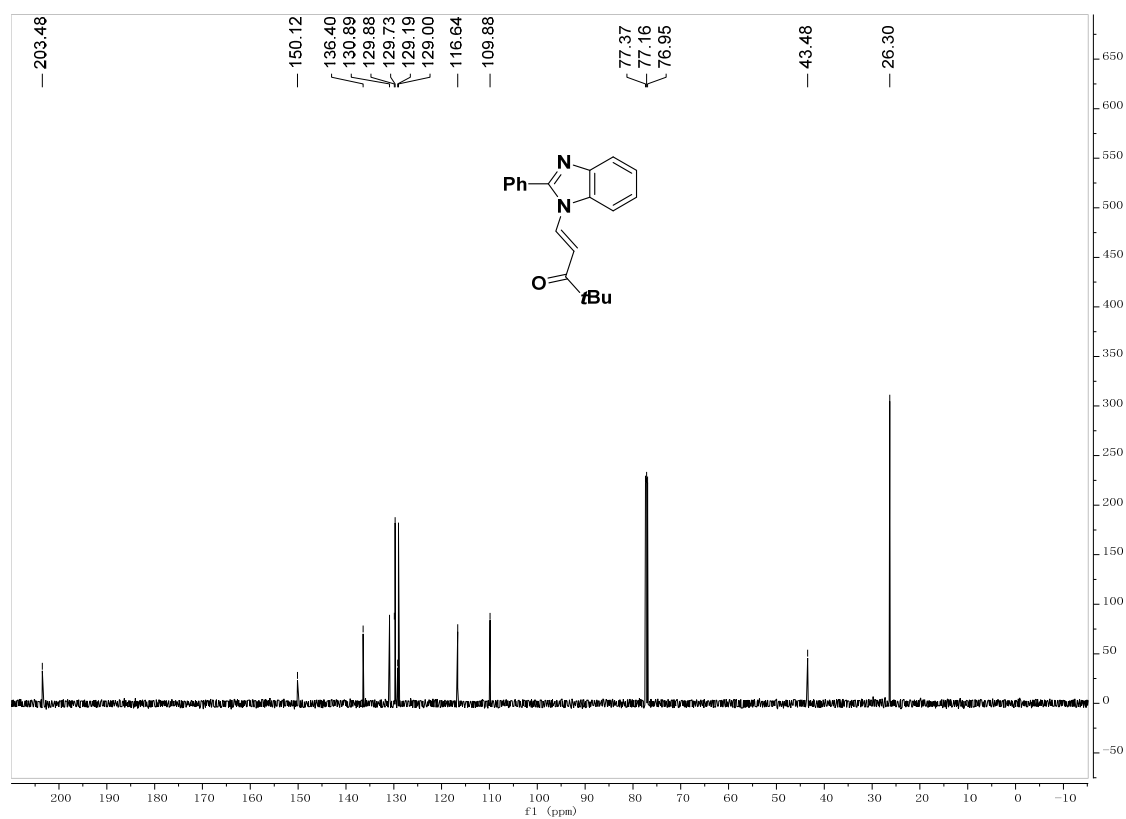

### <sup>1</sup>H NMR of 1z (400 MHz, CDCl<sub>3</sub>)

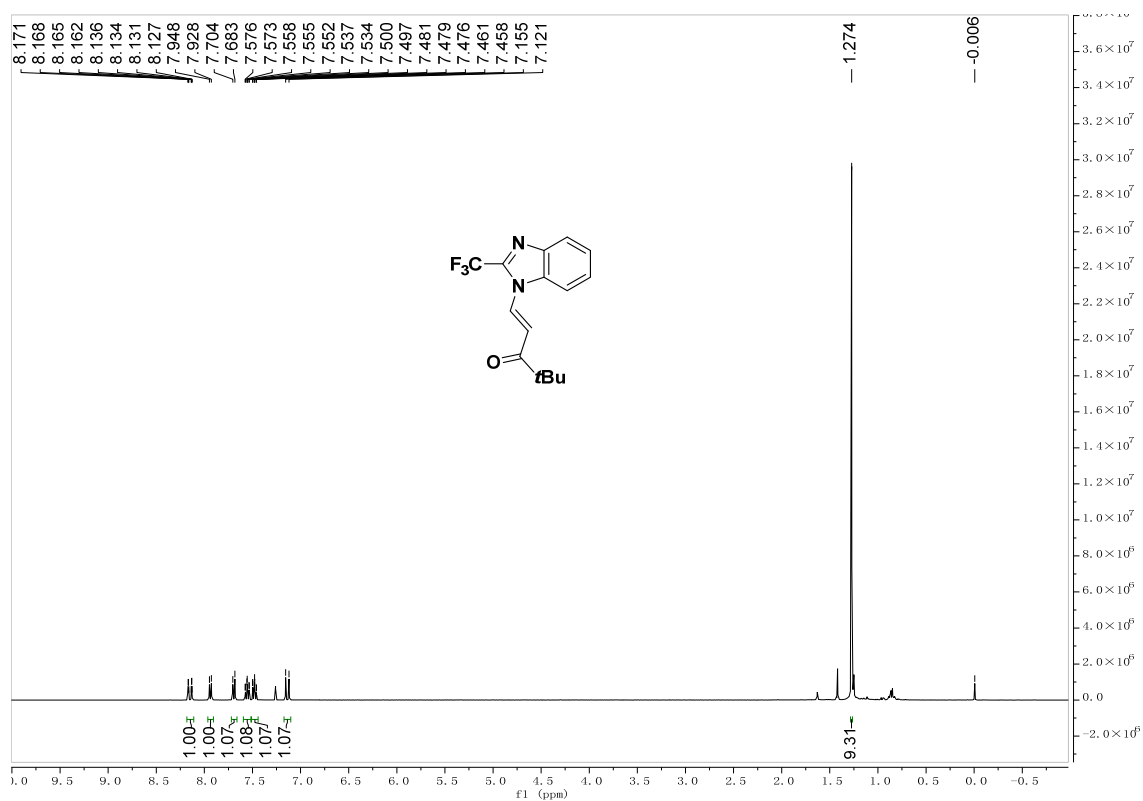

### <sup>13</sup>C NMR of 1z (100 MHz, CDCl<sub>3</sub>)

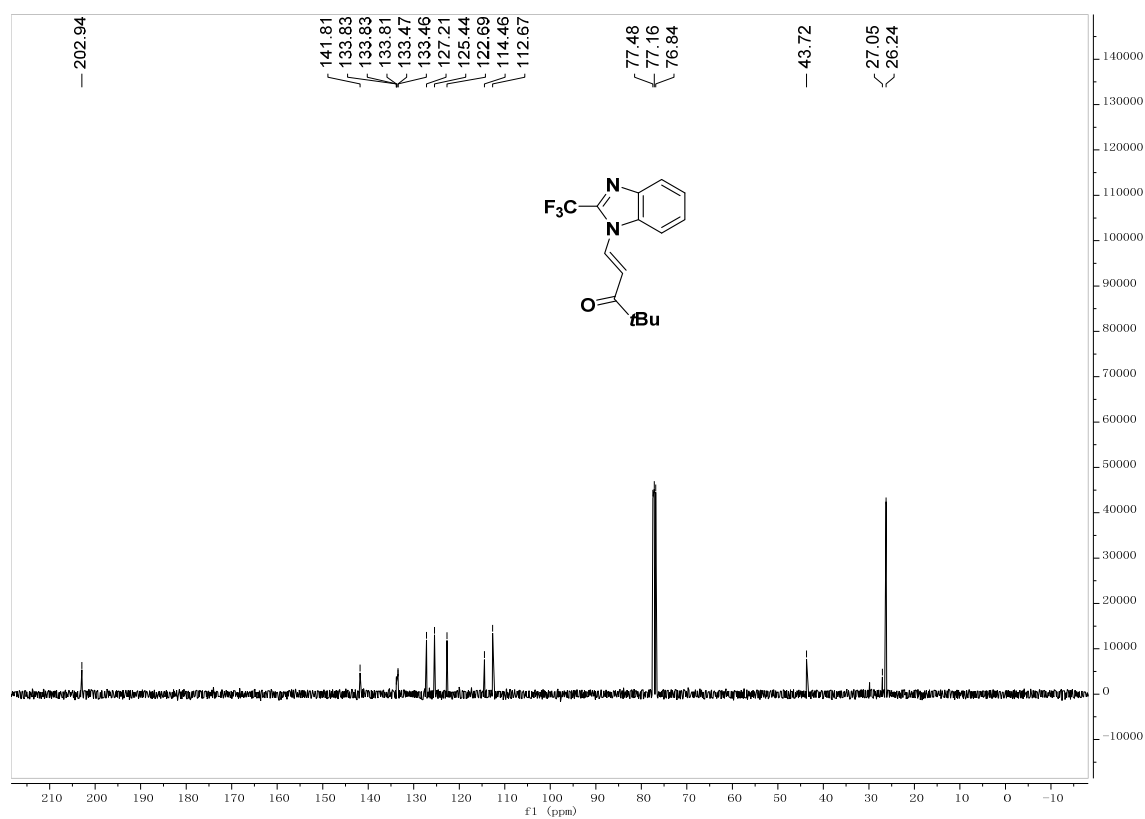

**<sup>1</sup>H NMR of 1aa (600 MHz, CDCl<sub>3</sub>)**

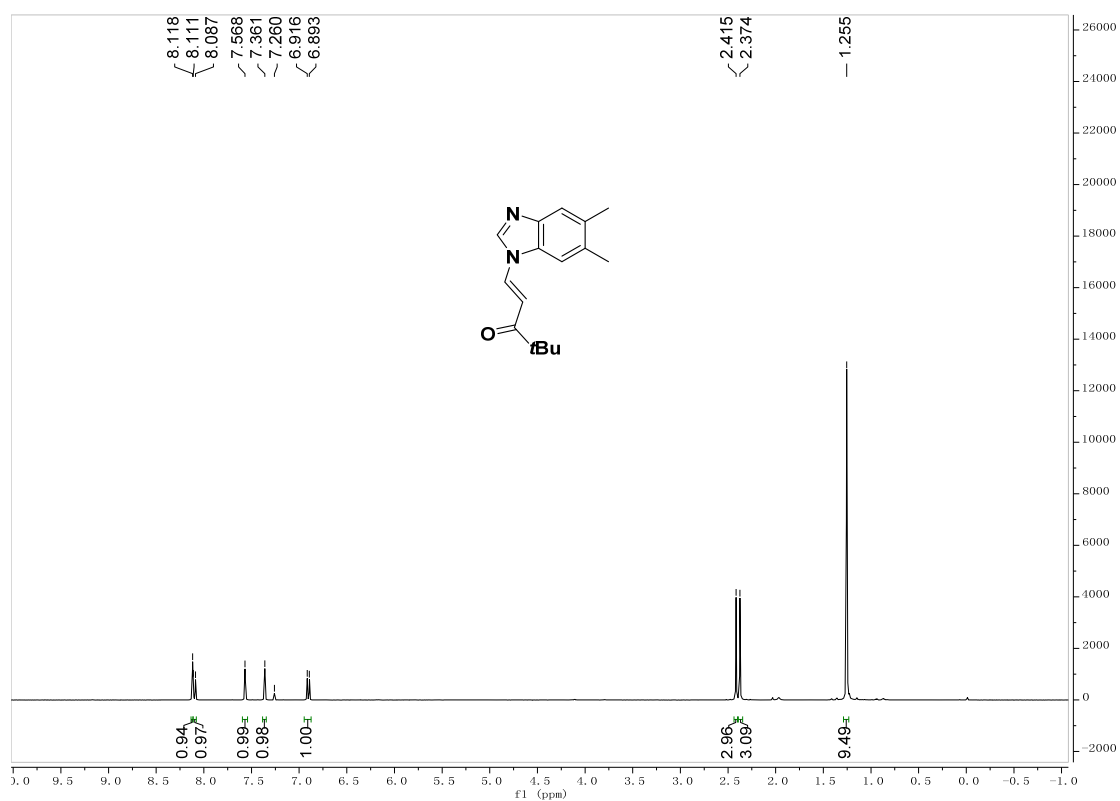

**<sup>13</sup>C NMR of 1aa (150 MHz, CDCl<sub>3</sub>)**

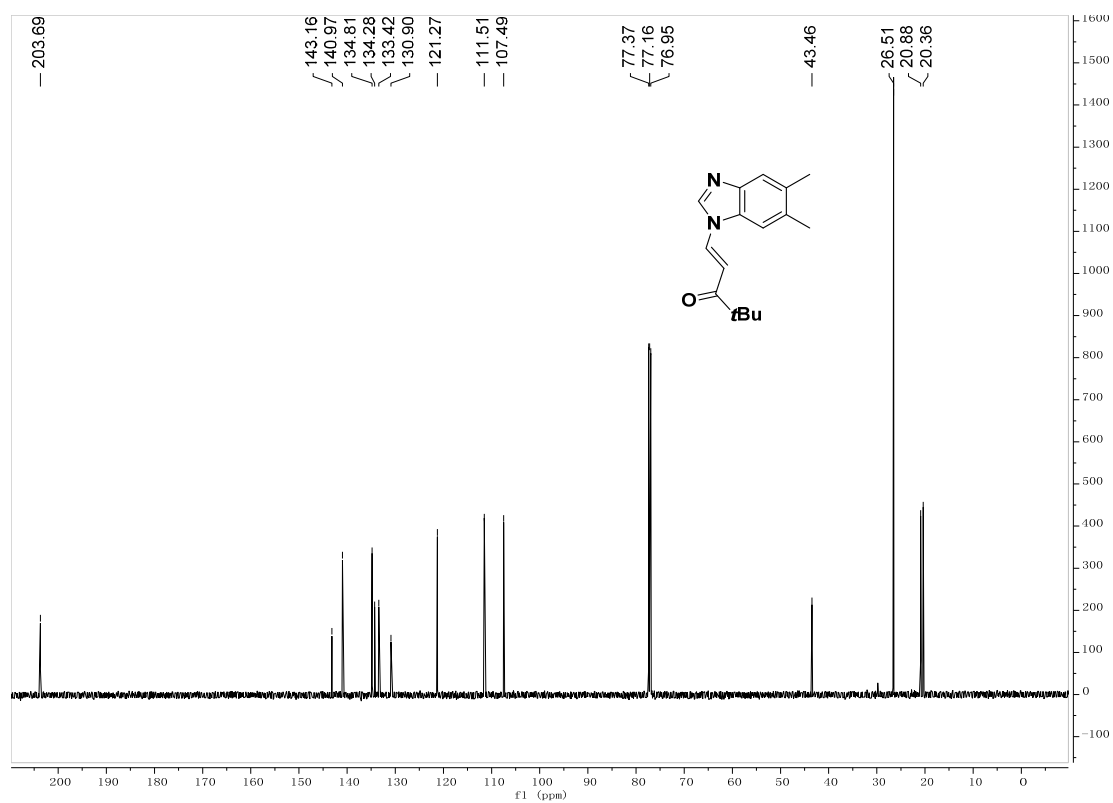

### <sup>1</sup>H NMR of 1ab (600 MHz, CDCl<sub>3</sub>)

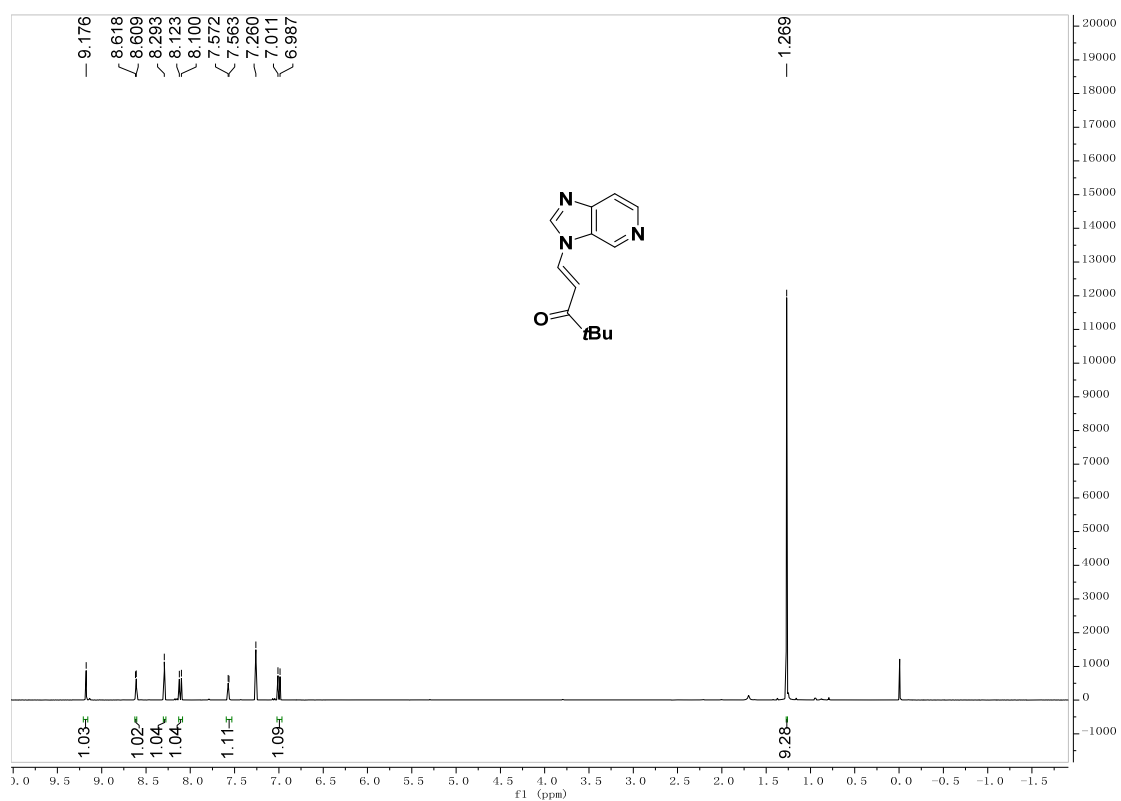

### <sup>13</sup>C NMR of 1ab (150 MHz, CDCl<sub>3</sub>)

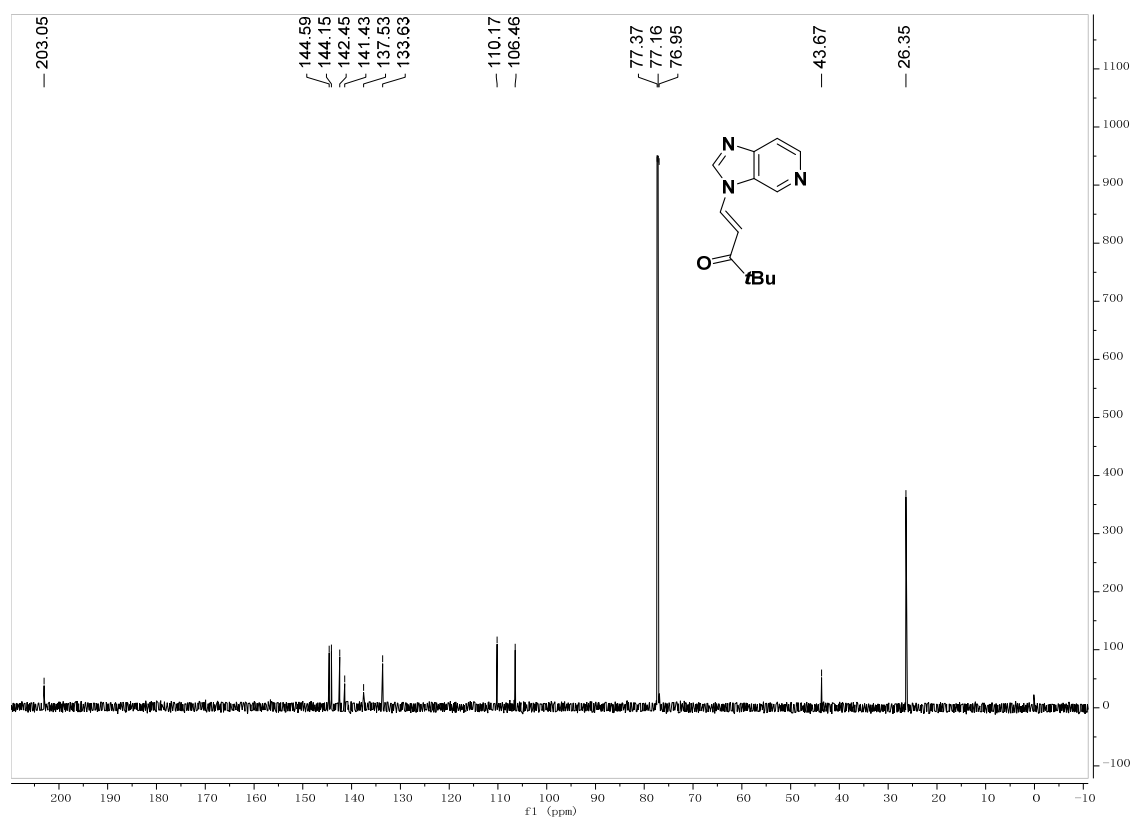

### <sup>1</sup>H NMR of 1ac (600 MHz, CDCl<sub>3</sub>)

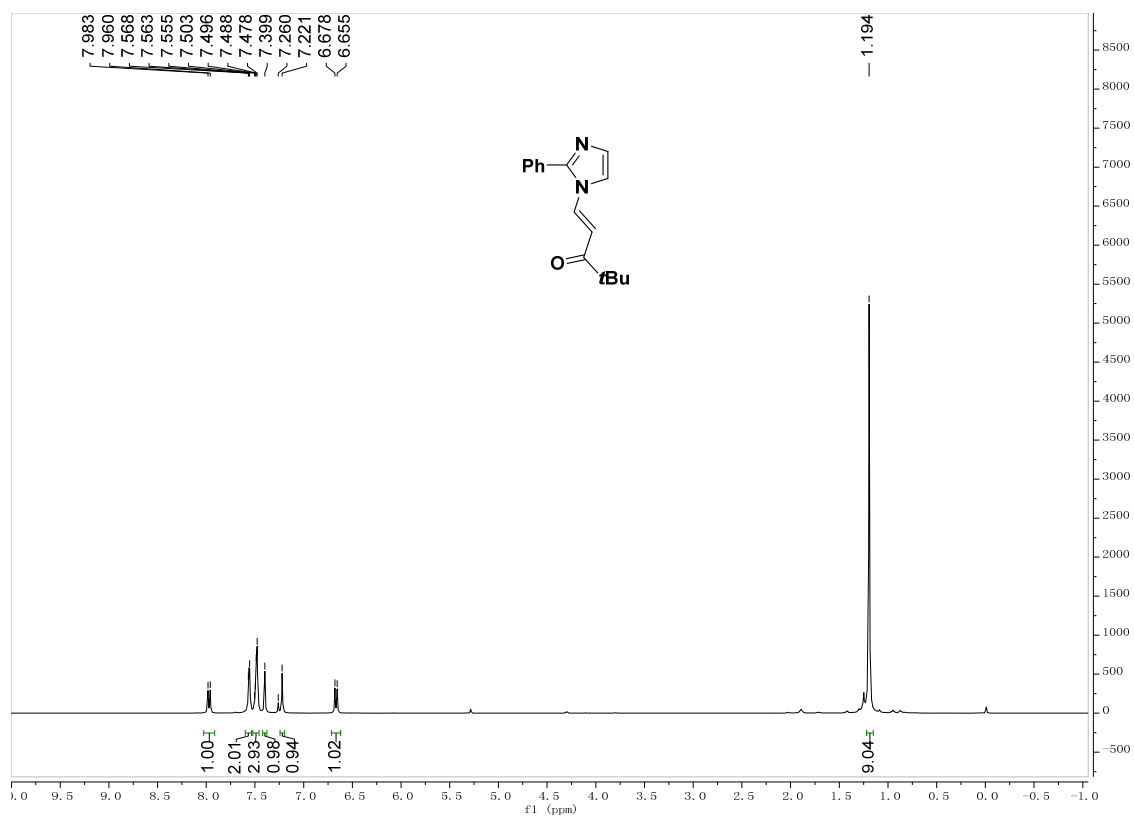

### <sup>13</sup>C NMR of 1ac (150 MHz, CDCl<sub>3</sub>)

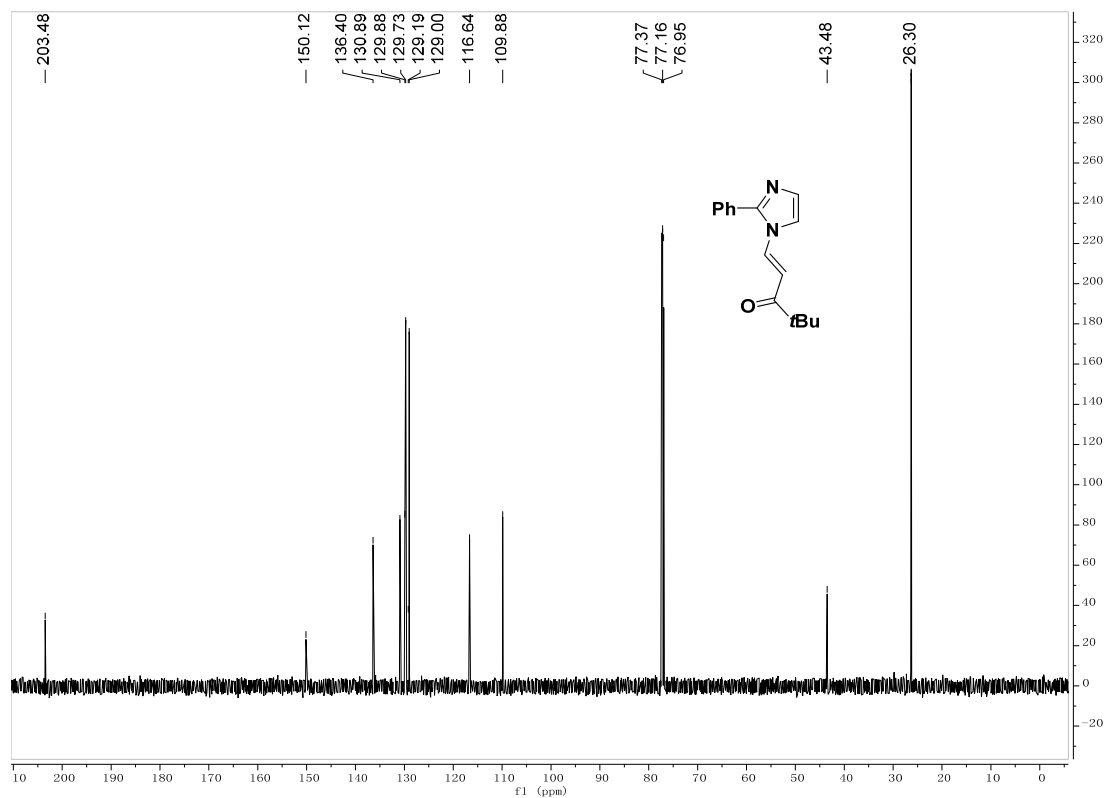

### <sup>1</sup>H NMR of 1ad (400 MHz, CDCl<sub>3</sub>)

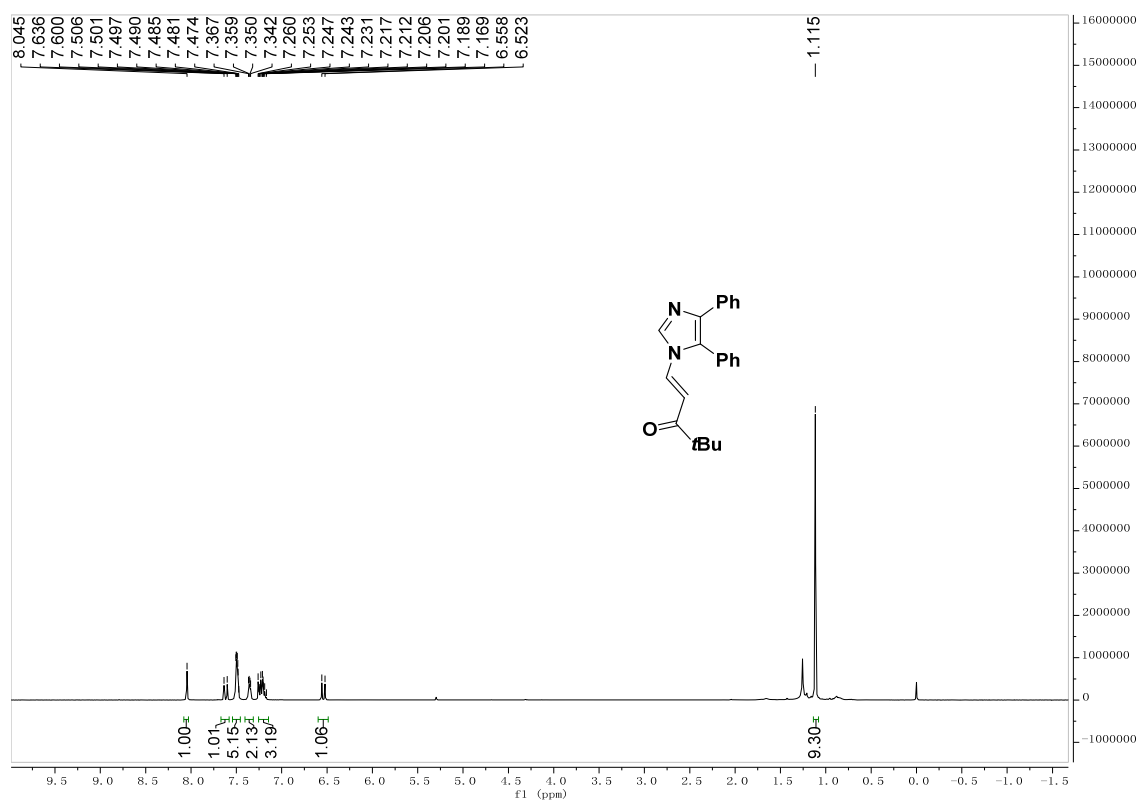

### <sup>13</sup>C NMR of 1ad (100 MHz, CDCl<sub>3</sub>)

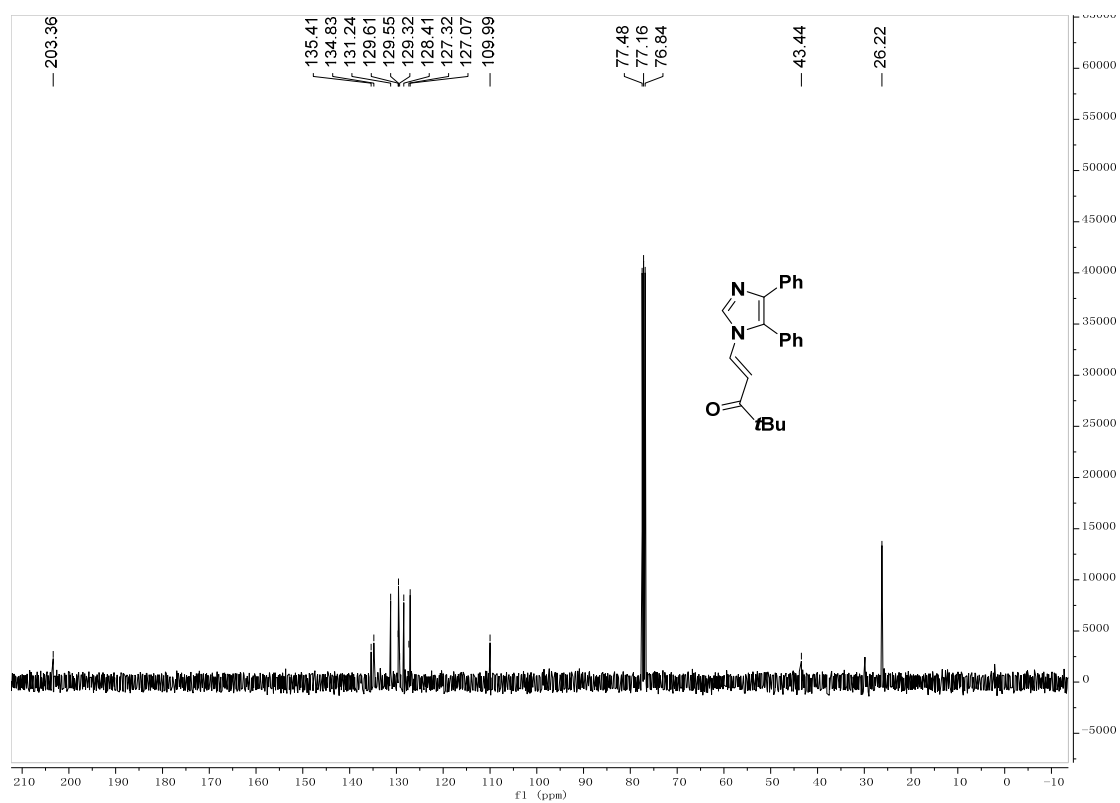



### <sup>1</sup>H NMR of 3a (400 MHz, CDCl<sub>3</sub>)

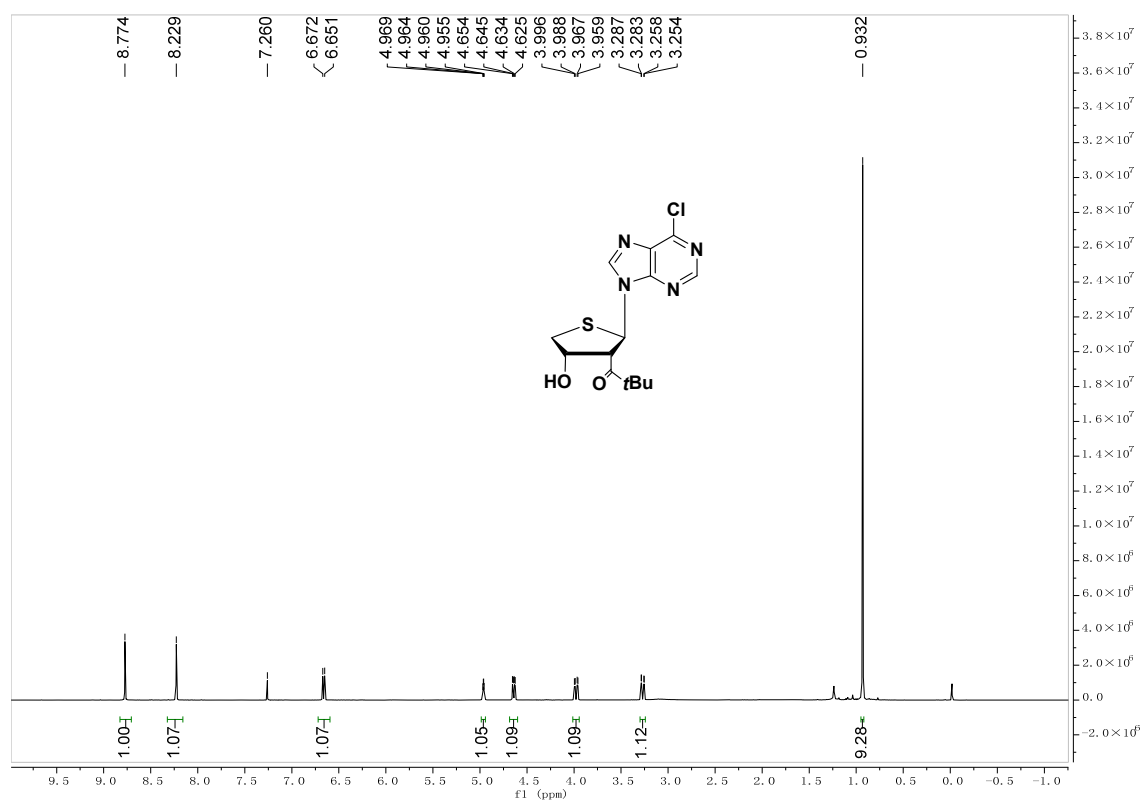

### <sup>13</sup>C NMR of 3a (150 MHz, CDCl<sub>3</sub>)

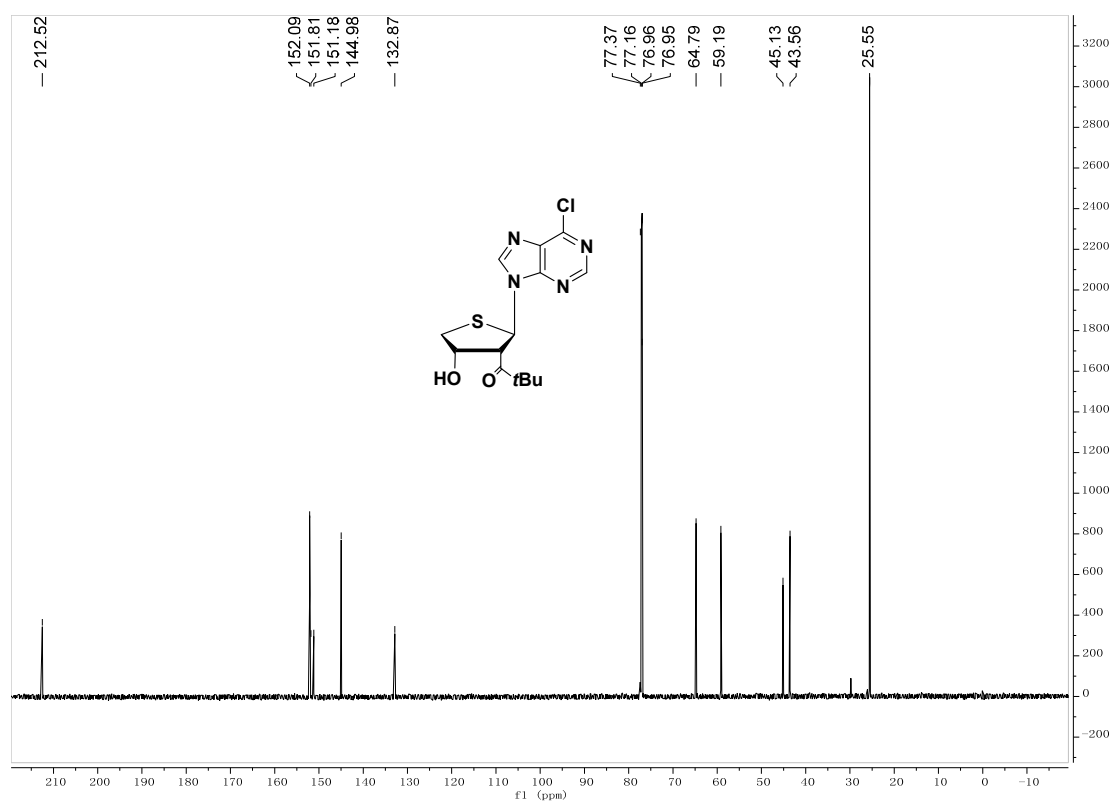

### $^1\text{H}$ NMR of **3b** (400 MHz, $\text{CDCl}_3$ )

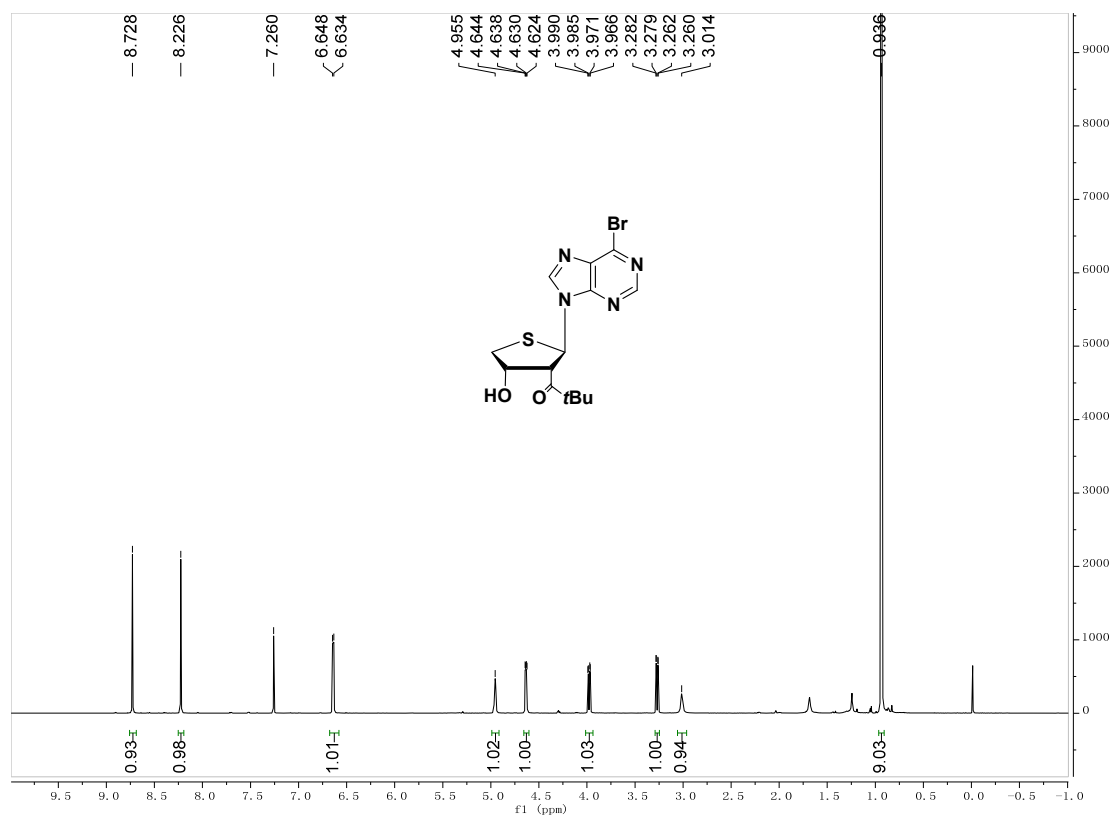

### $^{13}\text{C}$ NMR of **3b** (100 MHz, $\text{CDCl}_3$ )

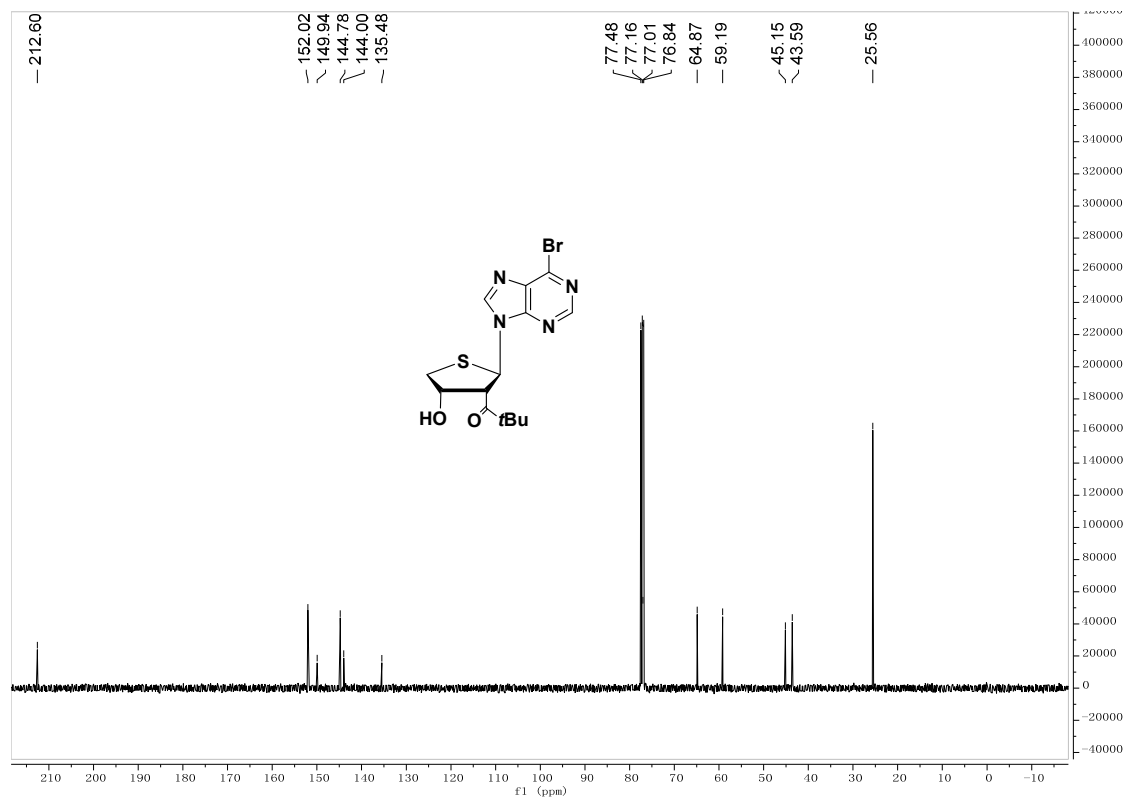

### $^1\text{H}$ NMR of **3c** (600 MHz, $\text{CDCl}_3$ )

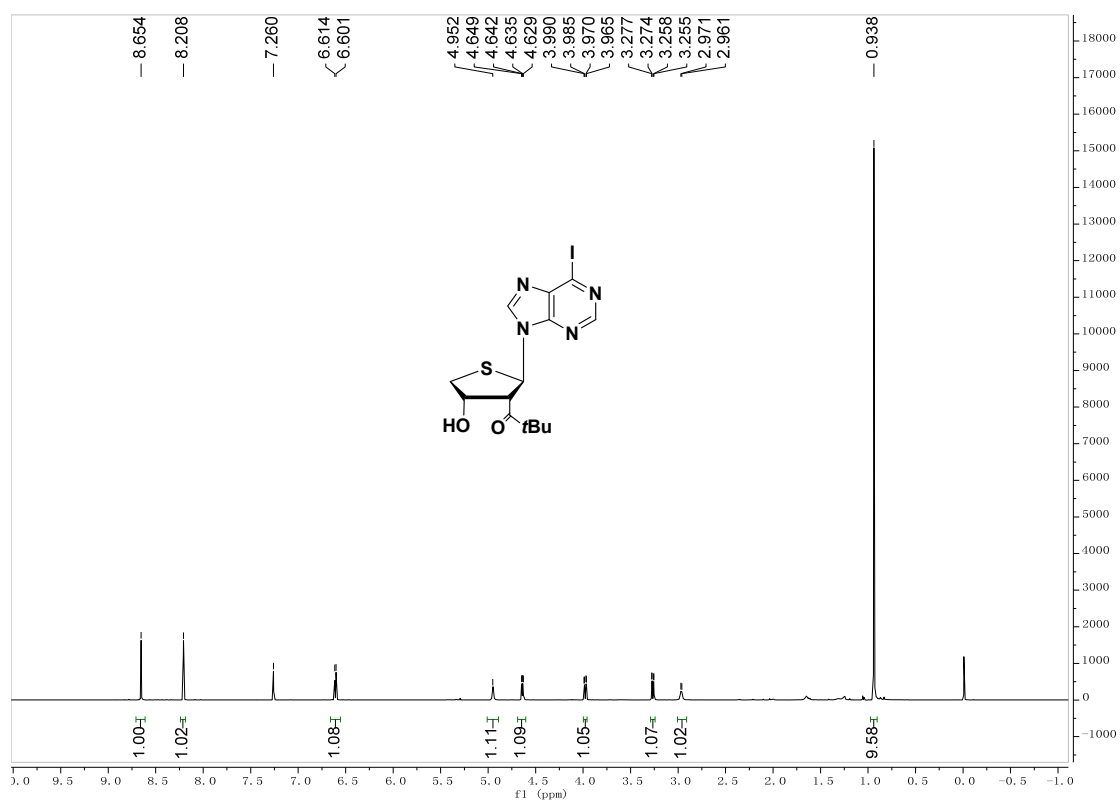

### $^{13}\text{C}$ NMR of **3c** (150 MHz, $\text{CDCl}_3$ )

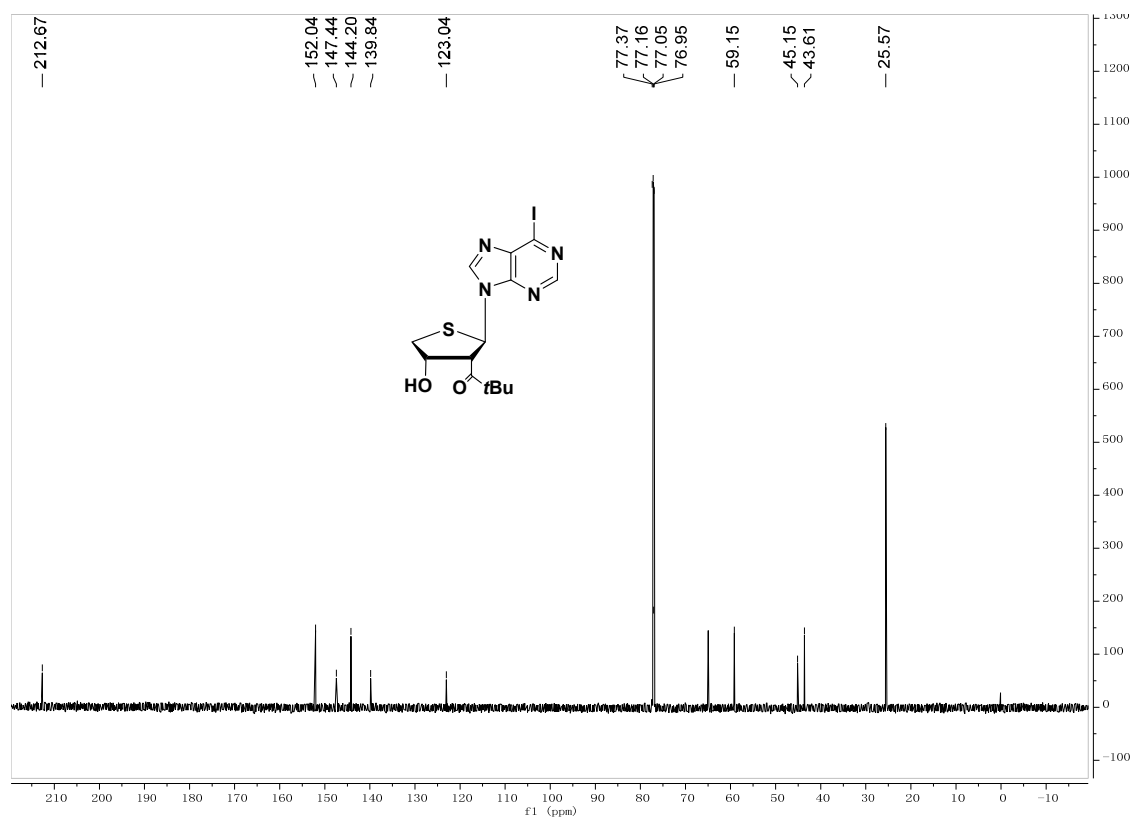

### <sup>1</sup>H NMR of 3d (400 MHz, CDCl<sub>3</sub>)

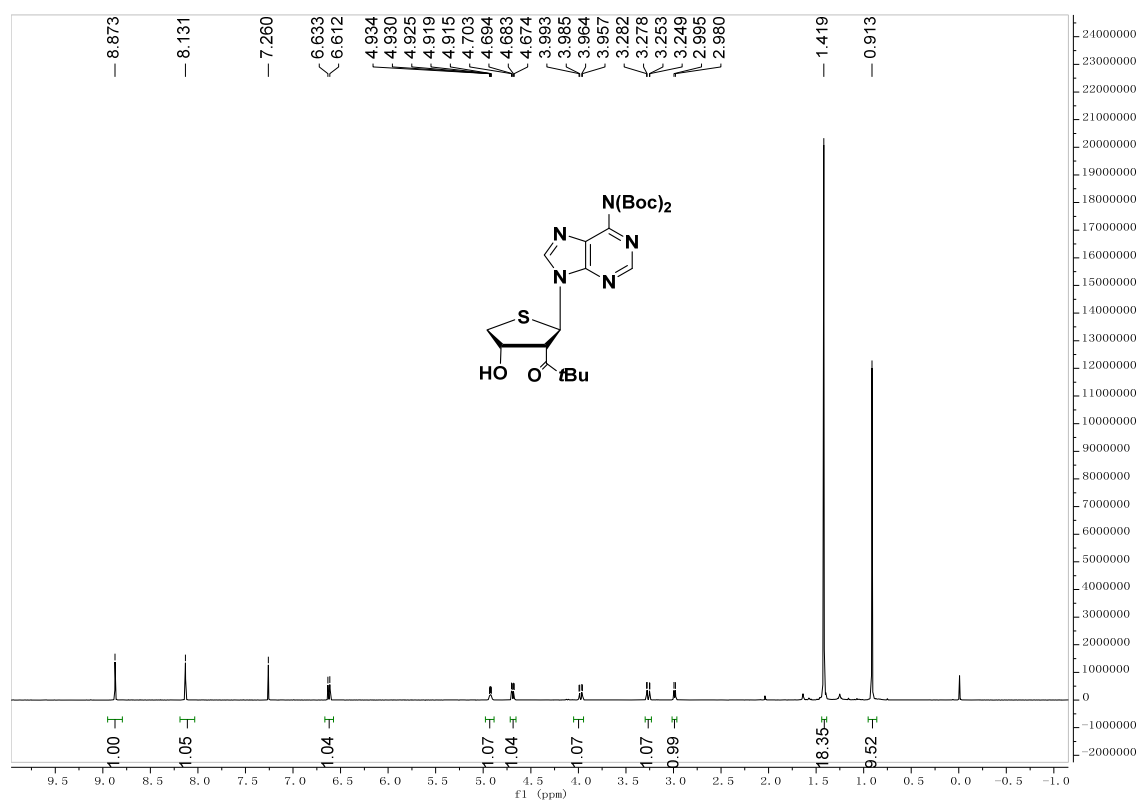

### <sup>13</sup>C NMR of 3d (100 MHz, CDCl<sub>3</sub>)

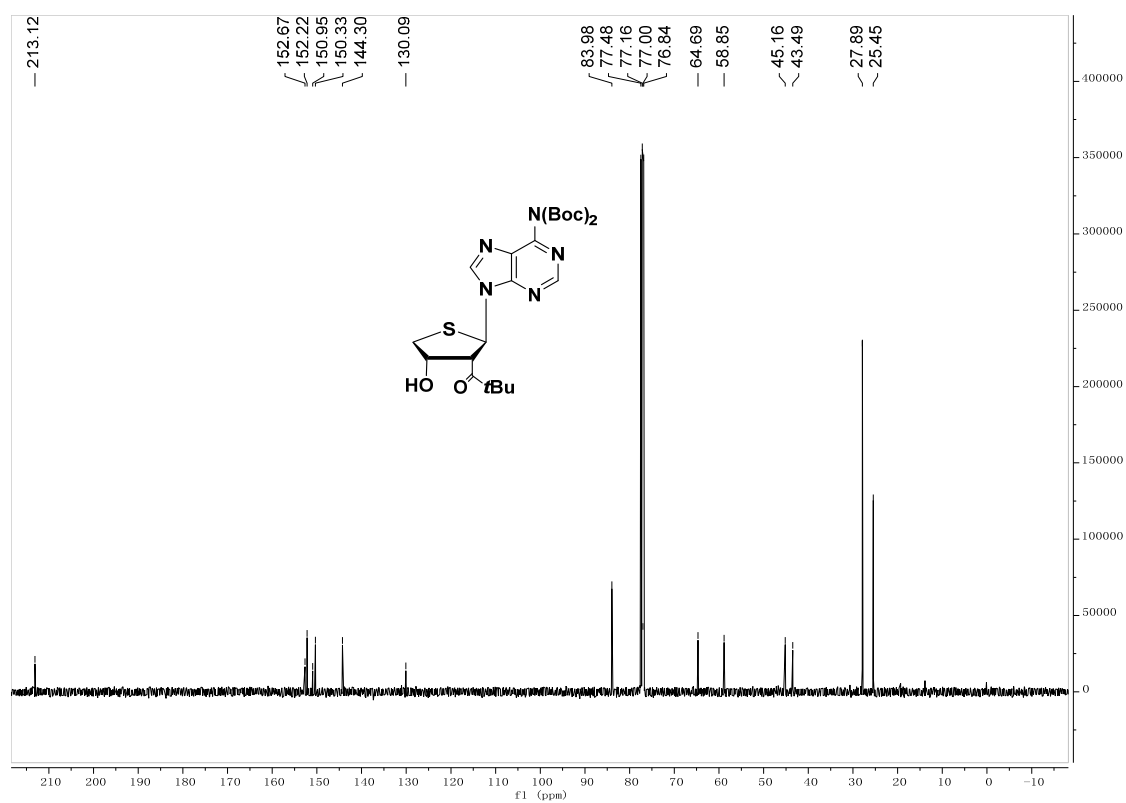

### $^1\text{H}$ NMR of **3e** (600 MHz, $\text{CDCl}_3$ )

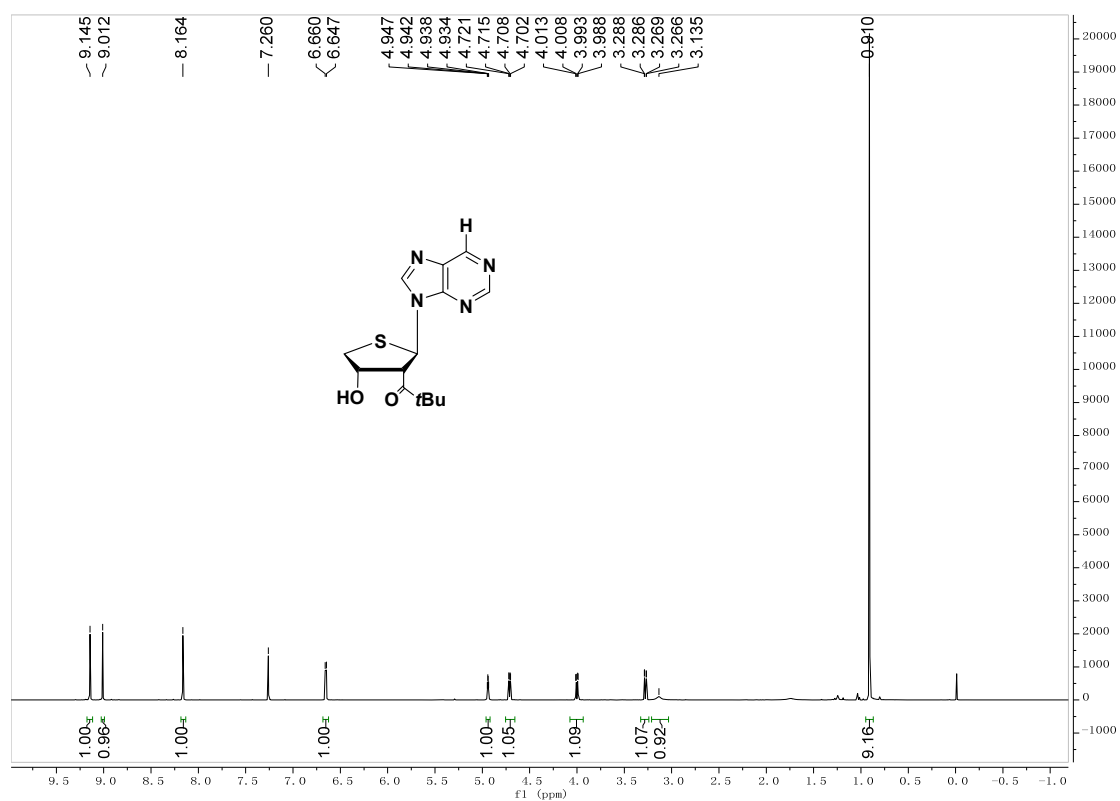

### $^{13}\text{C}$ NMR of **3e** (100 MHz, $\text{CDCl}_3$ )

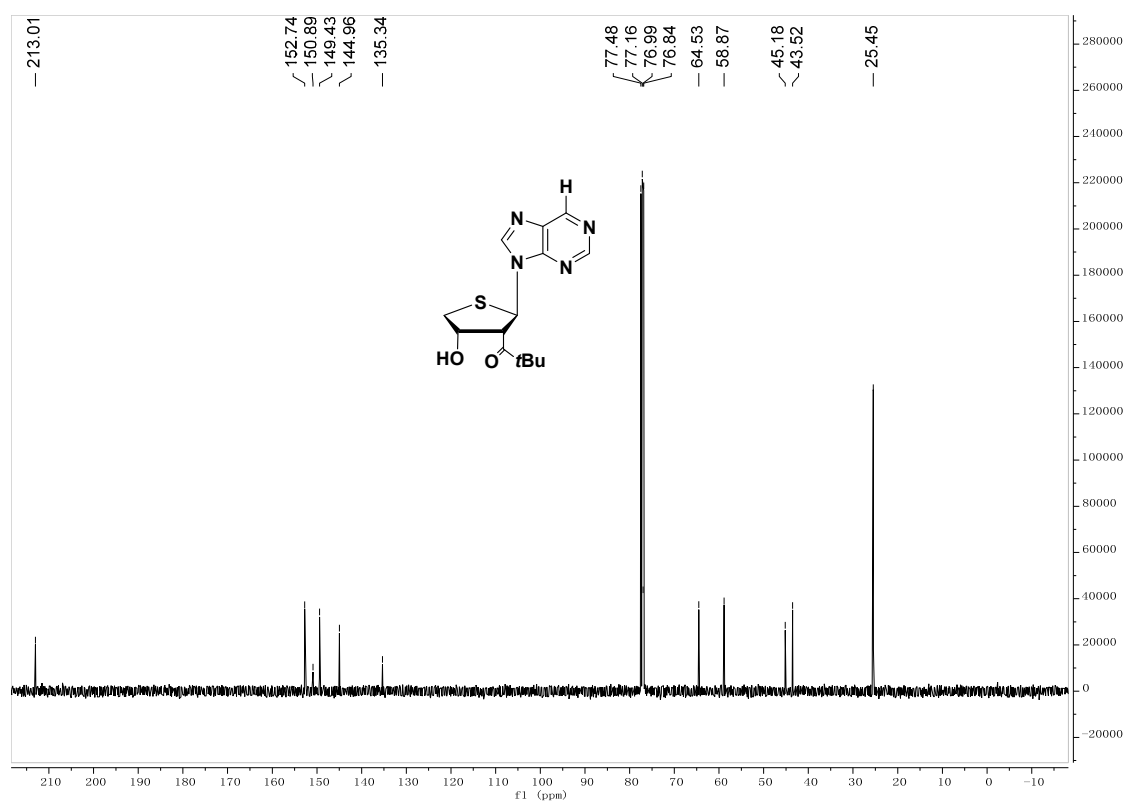

### $^1\text{H}$ NMR of 3f (400 MHz, $\text{CDCl}_3$ )

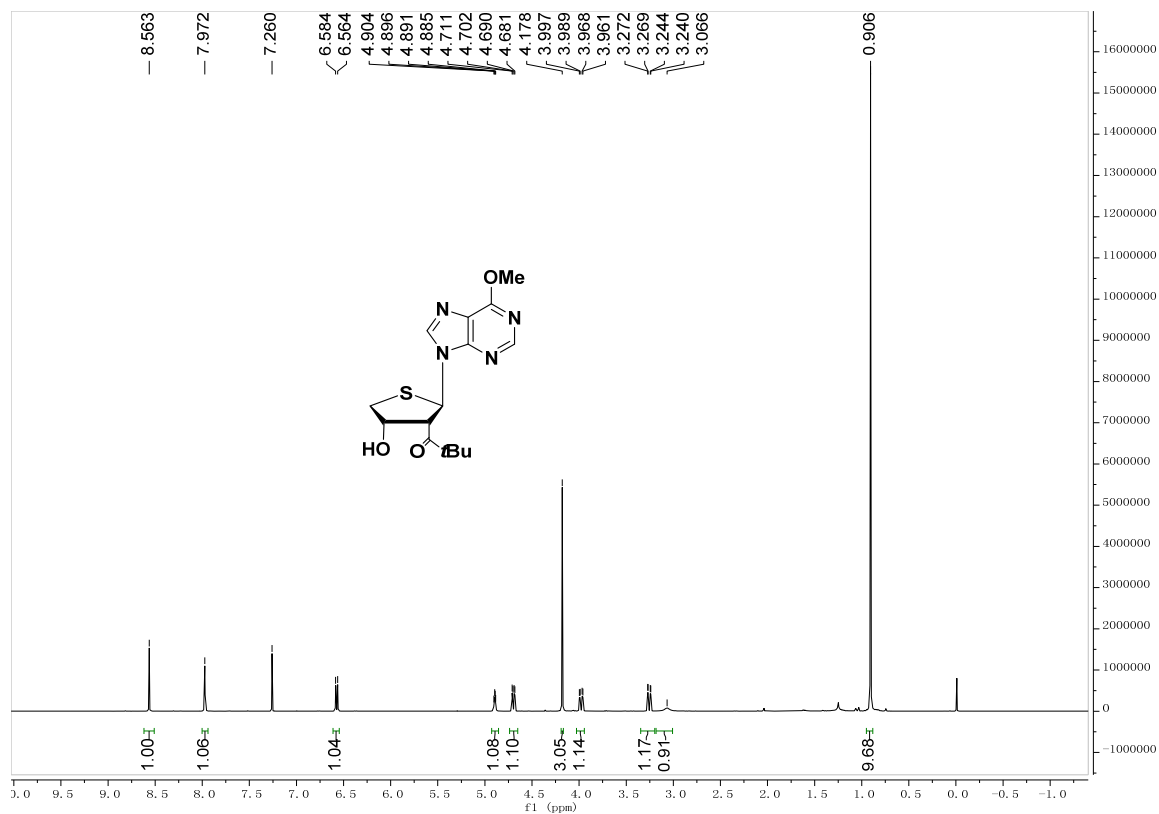

### $^{13}\text{C}$ NMR of 3f (100 MHz, $\text{CDCl}_3$ )

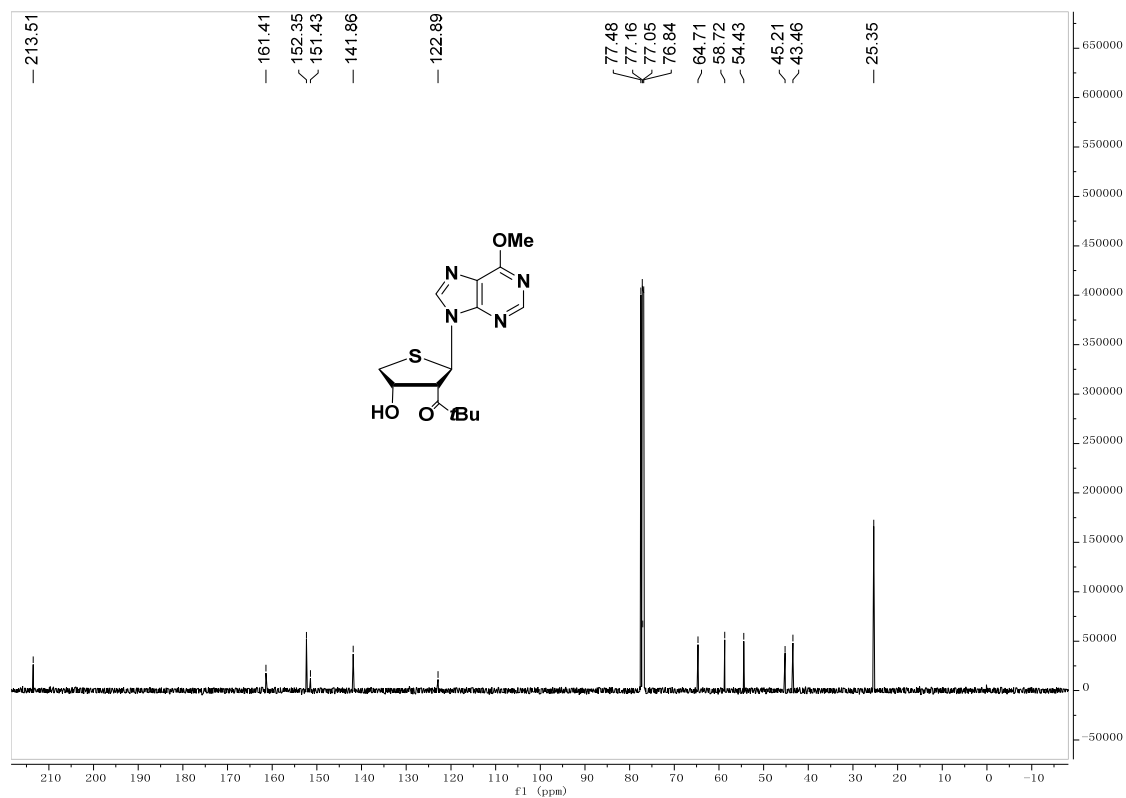

### <sup>1</sup>H NMR of 3g (400 MHz, CD<sub>3</sub>OD)

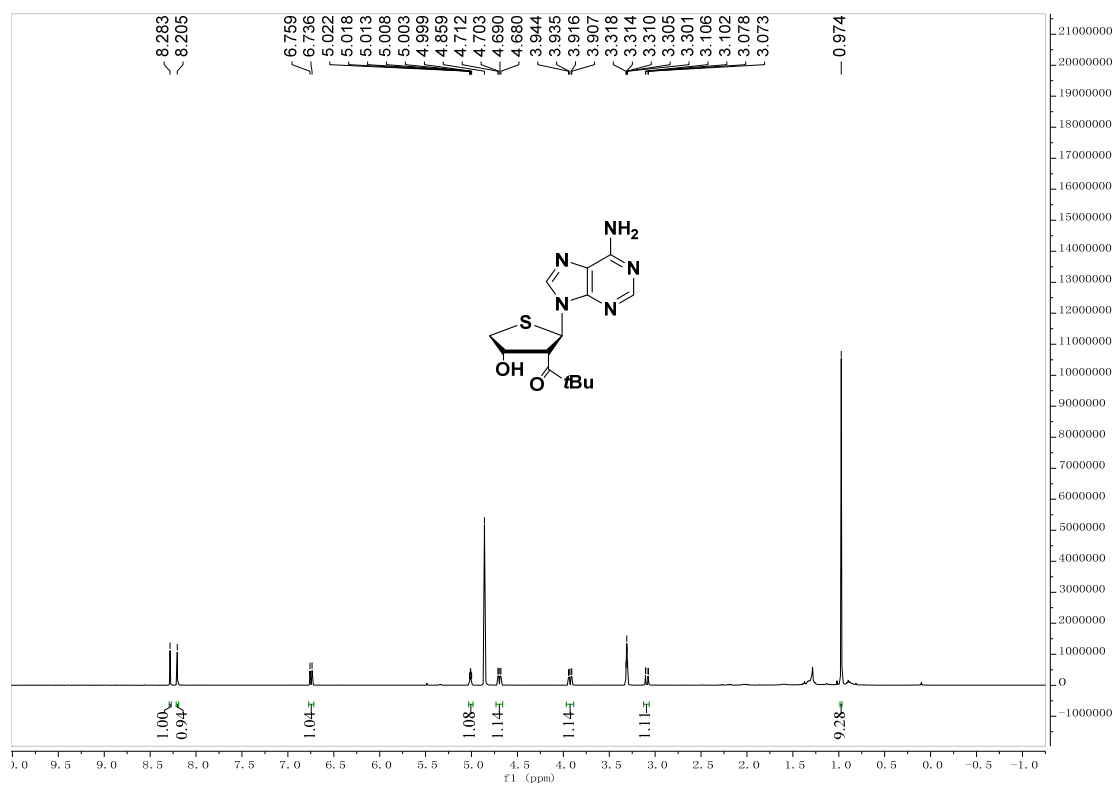

### <sup>13</sup>C NMR of 3g (100 MHz, CD<sub>3</sub>OD)

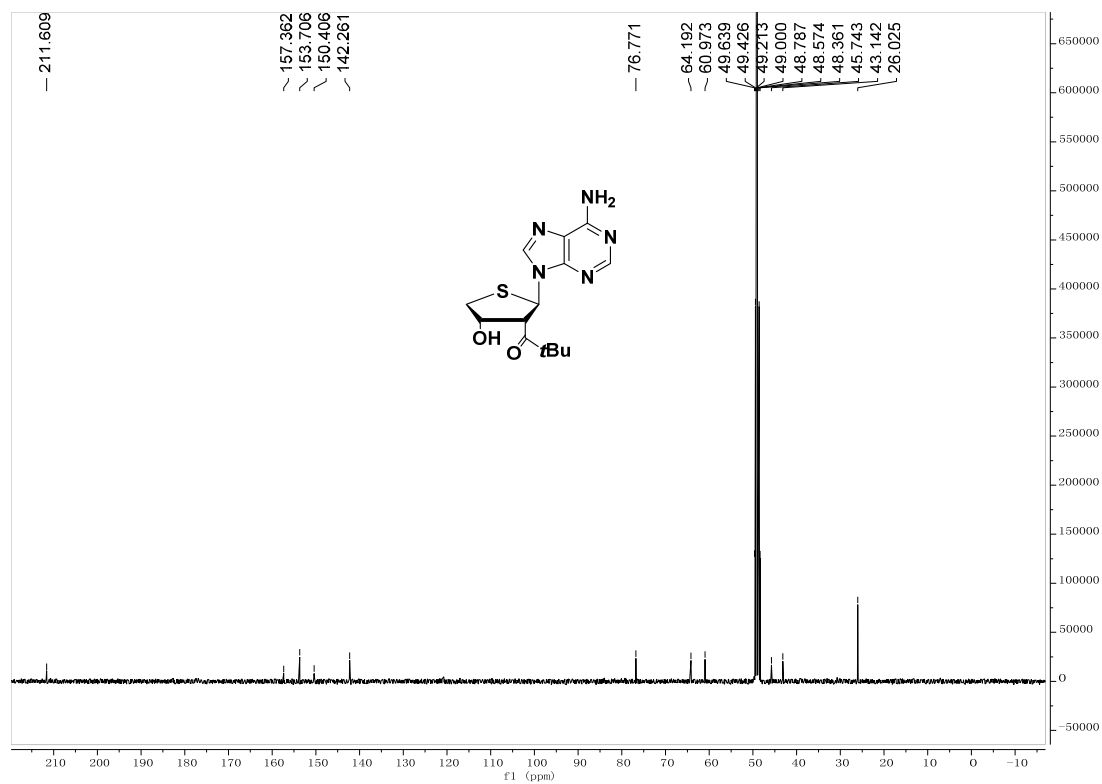

### $^1\text{H}$ NMR of 3h (600 MHz, $\text{CDCl}_3$ )

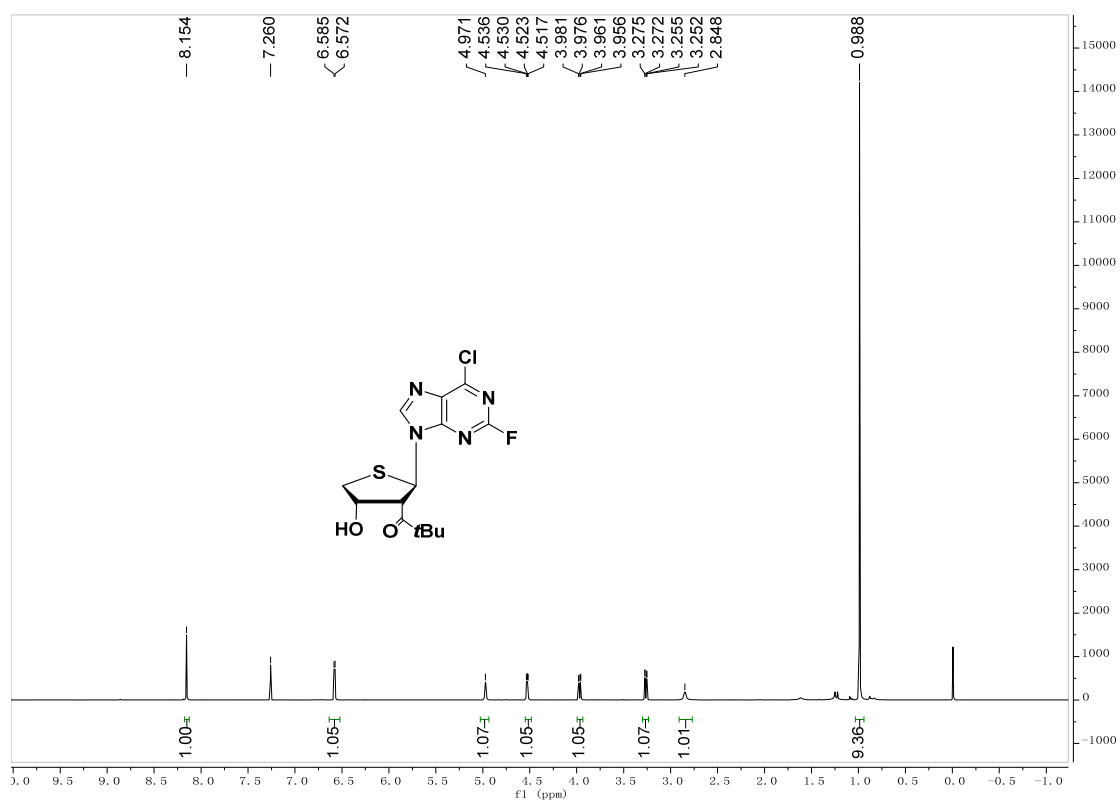

### $^{13}\text{C}$ NMR of 3h (150 MHz, $\text{CDCl}_3$ )

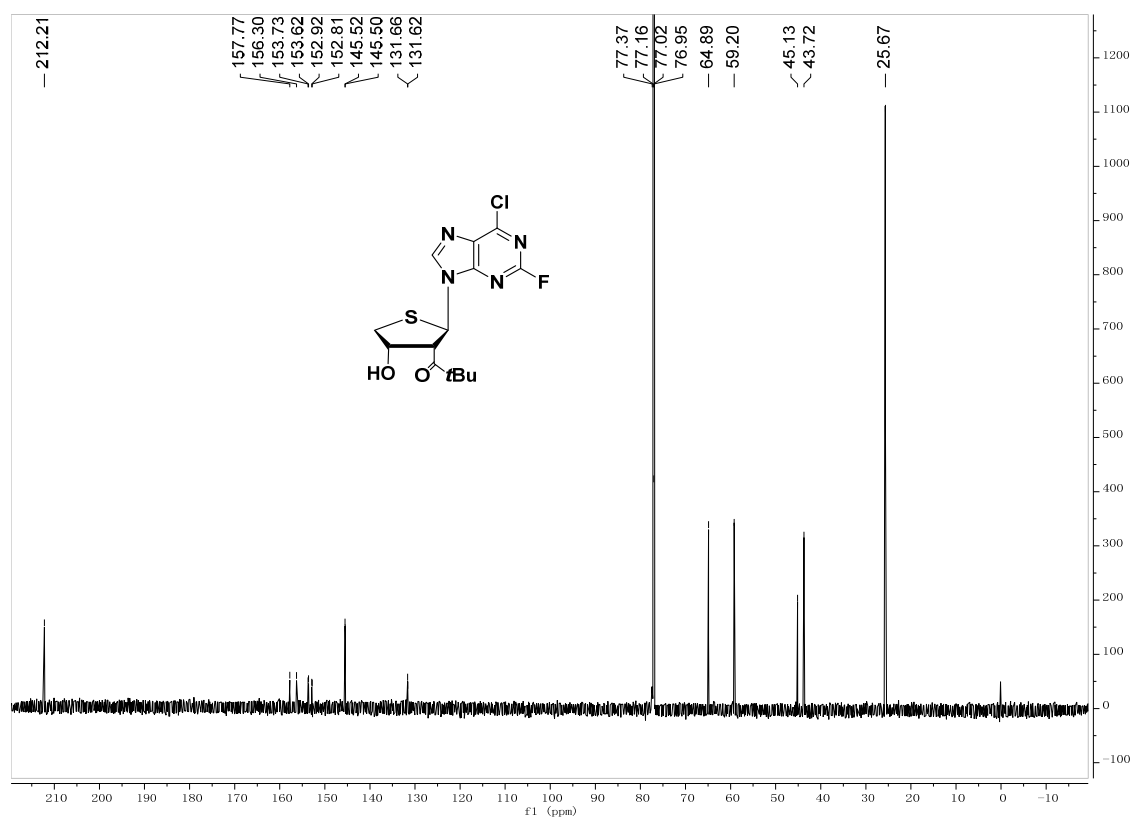



**<sup>19</sup>F NMR of 3h (565 MHz, CDCl<sub>3</sub>)**

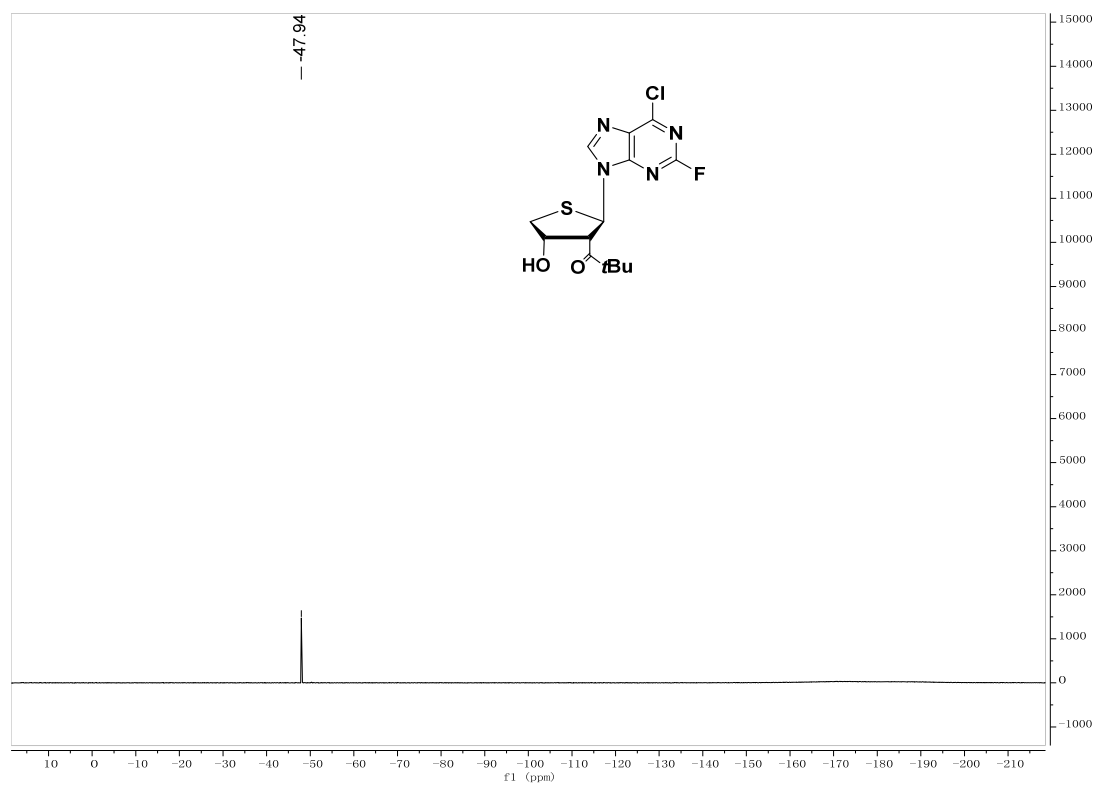

### <sup>1</sup>H NMR of 3i (400 MHz, CDCl<sub>3</sub>)

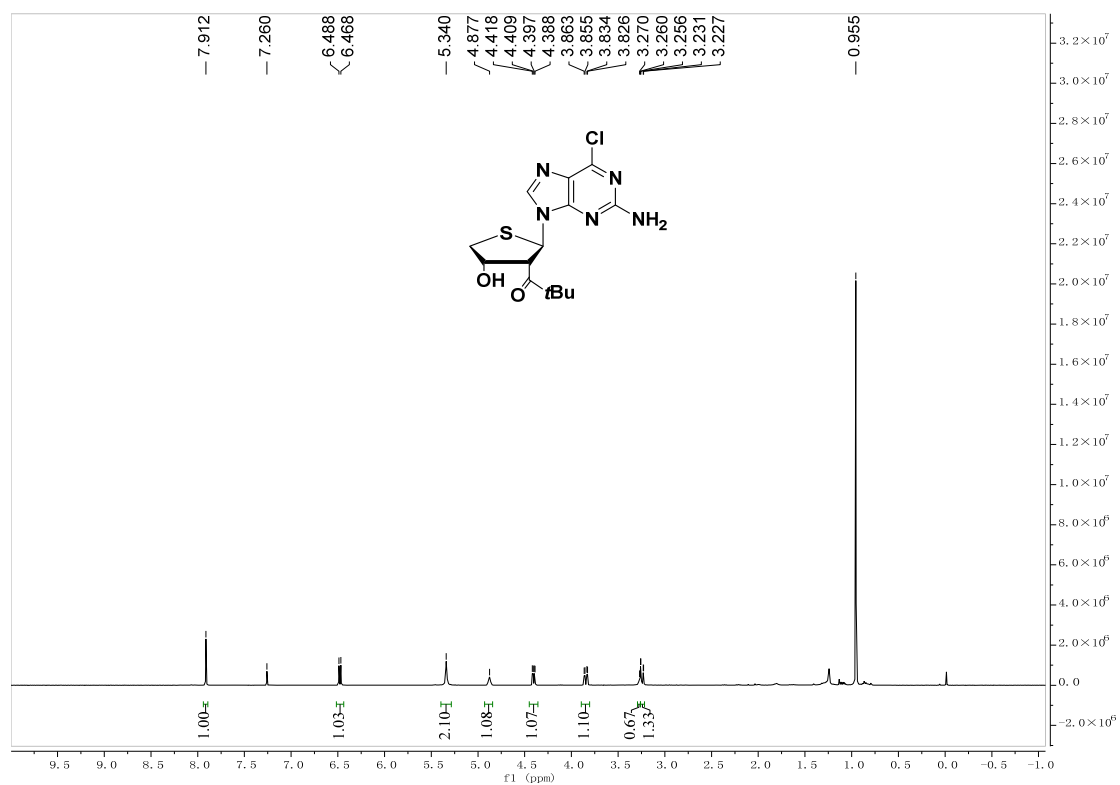

### <sup>13</sup>C NMR of 3i (100 MHz, CDCl<sub>3</sub>)

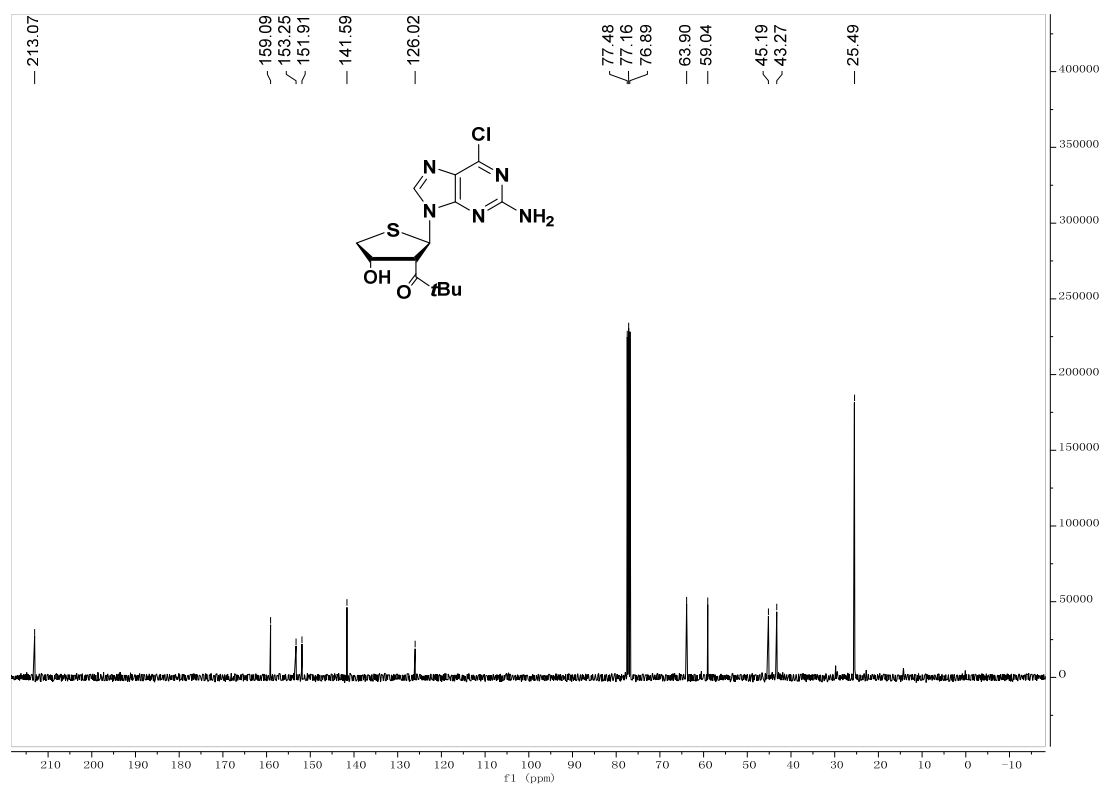

### <sup>1</sup>H NMR of 3j (400 MHz, CDCl<sub>3</sub>)

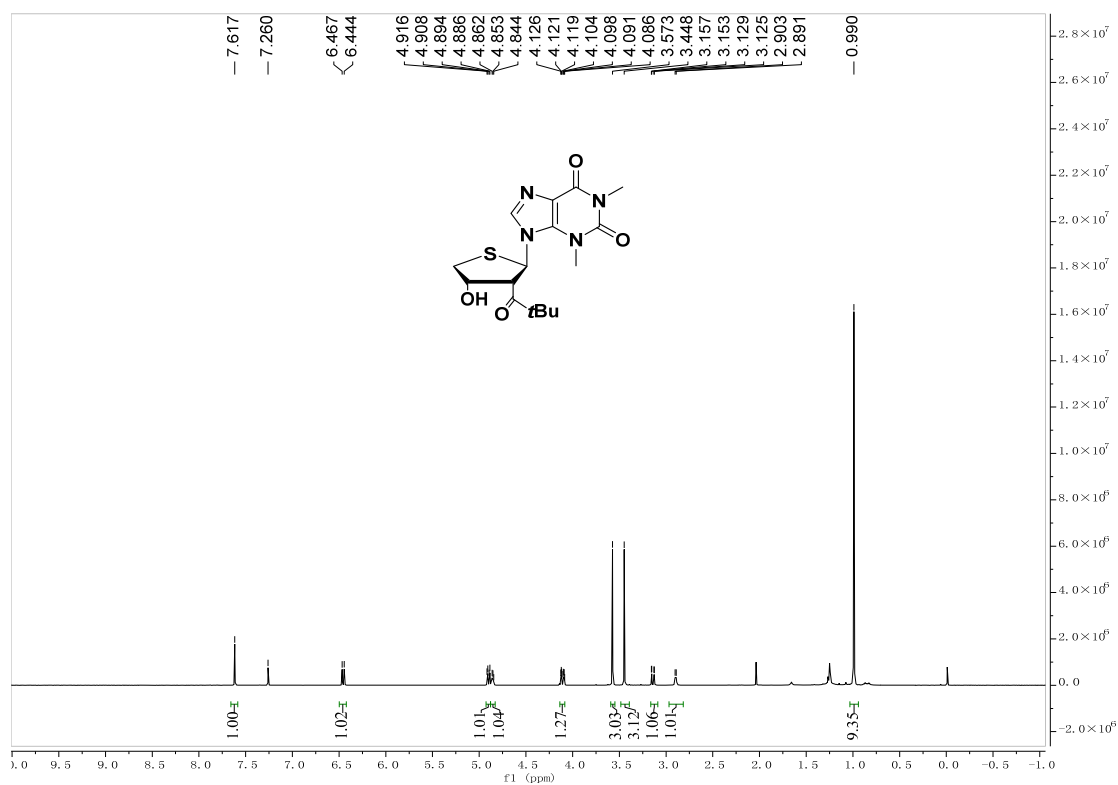

### <sup>13</sup>C NMR of 3j (100 MHz, CDCl<sub>3</sub>)

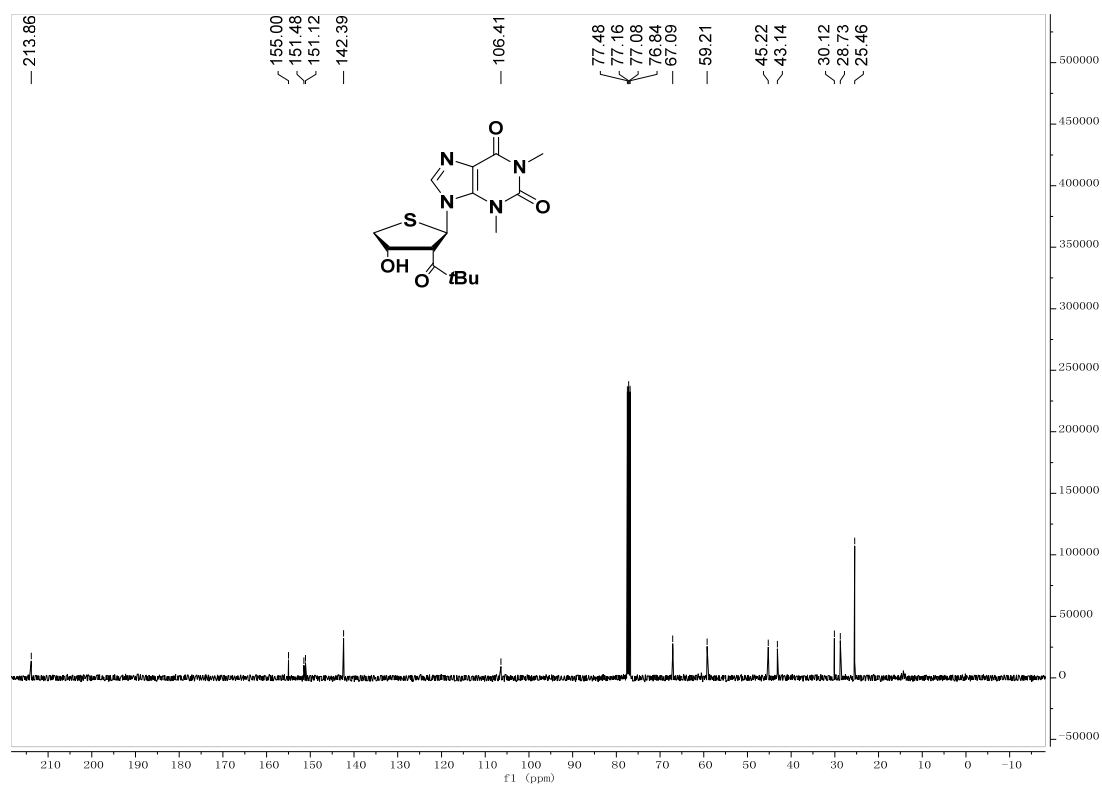

### $^1\text{H}$ NMR of 3k (600 MHz, $\text{CDCl}_3$ )

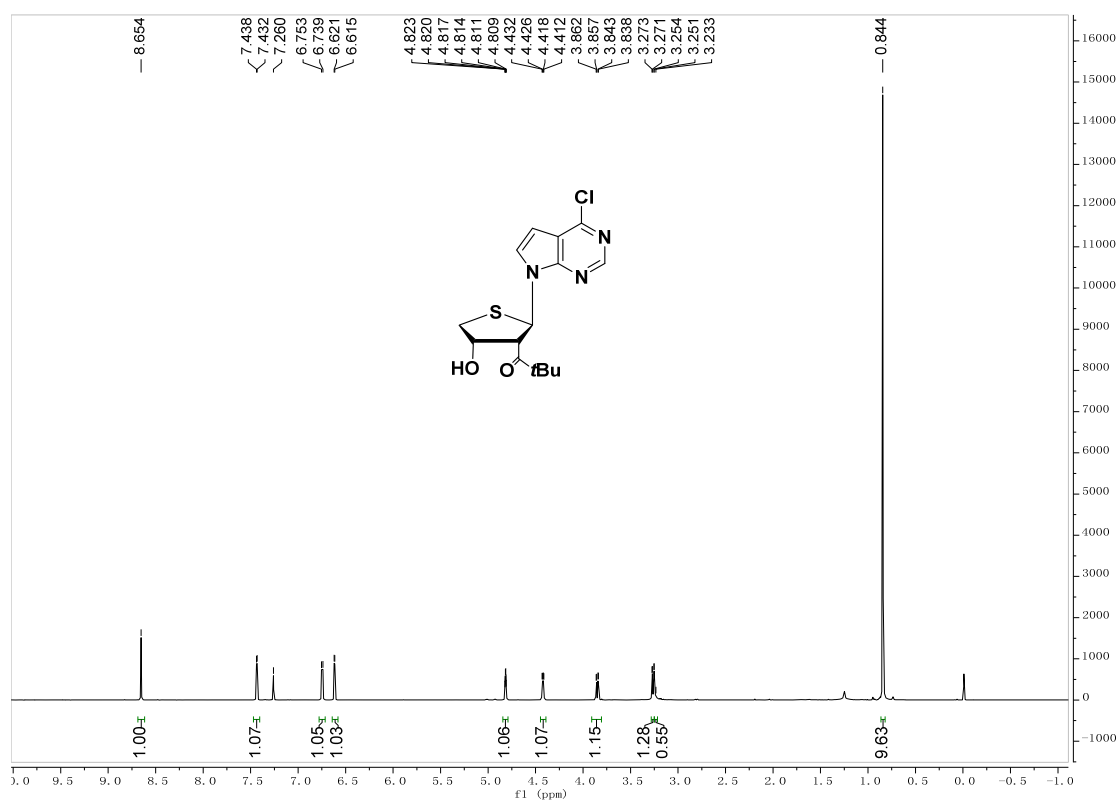

### $^{13}\text{C}$ NMR of 3k (150 MHz, $\text{CDCl}_3$ )

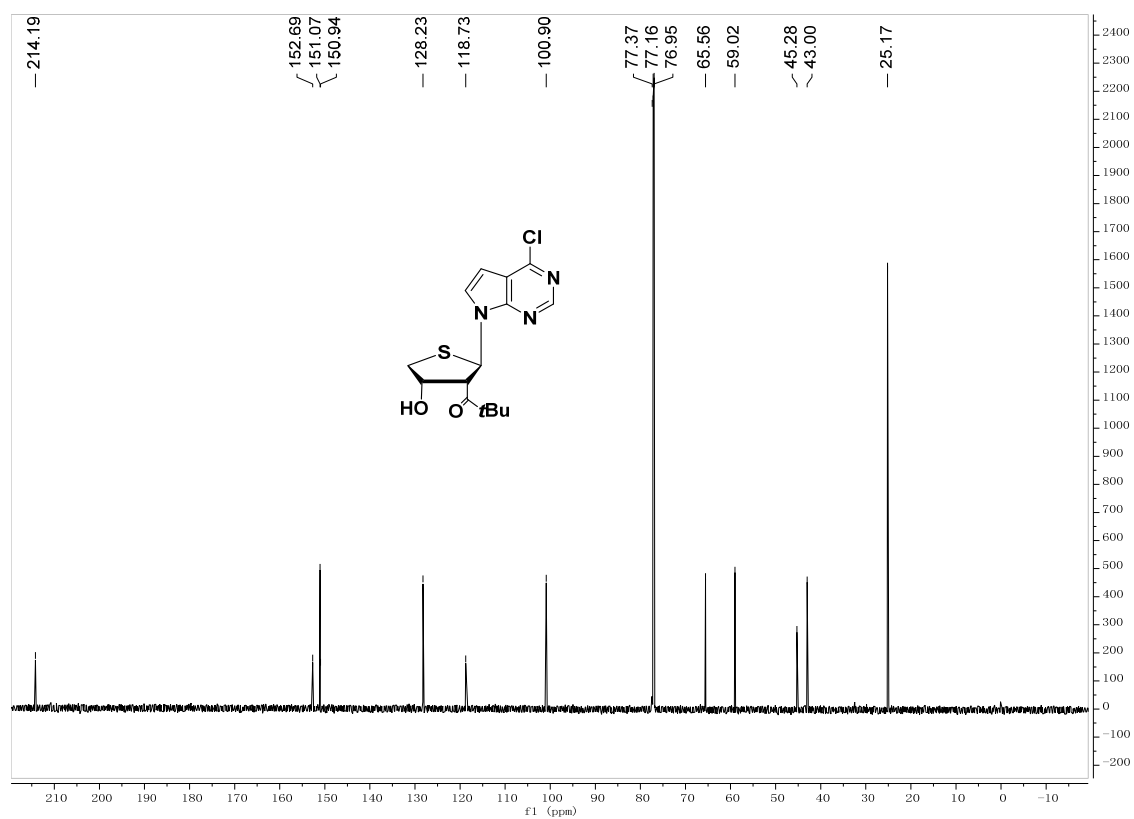

### <sup>1</sup>H NMR of 3I (600 MHz, CDCl<sub>3</sub>)

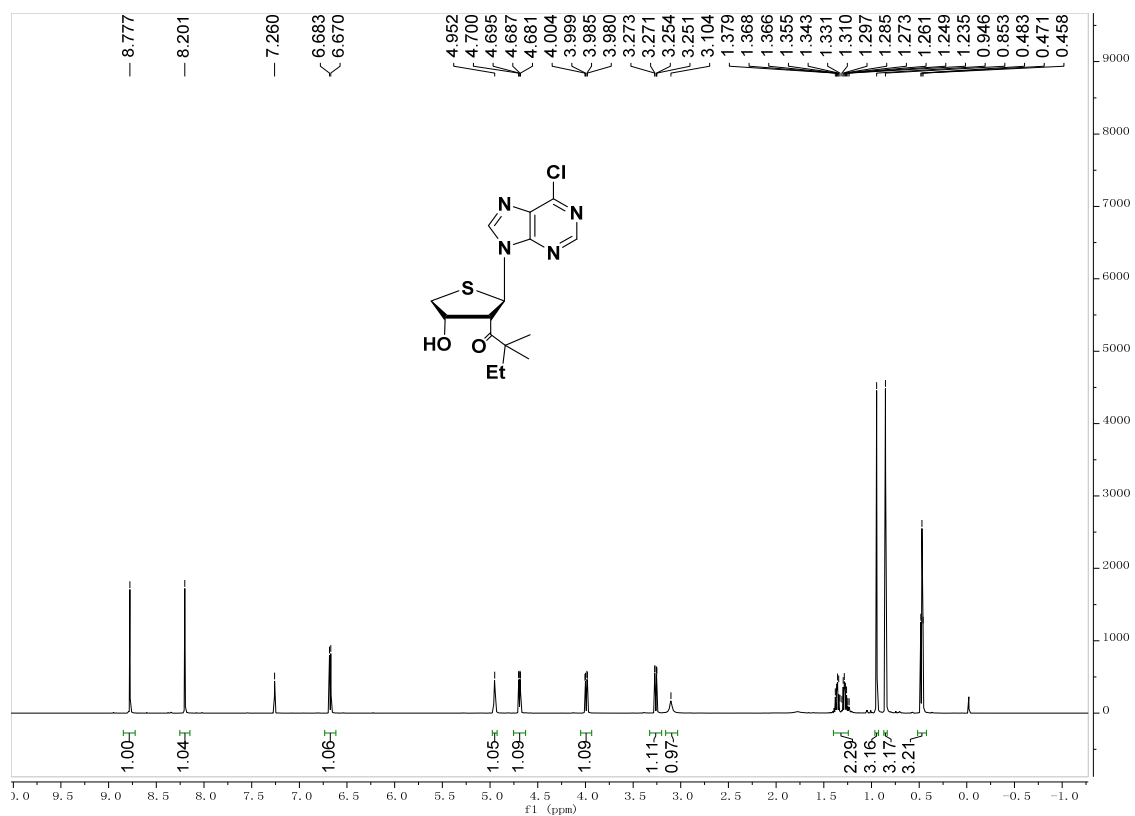

### <sup>13</sup>C NMR of 3I (150 MHz, CDCl<sub>3</sub>)

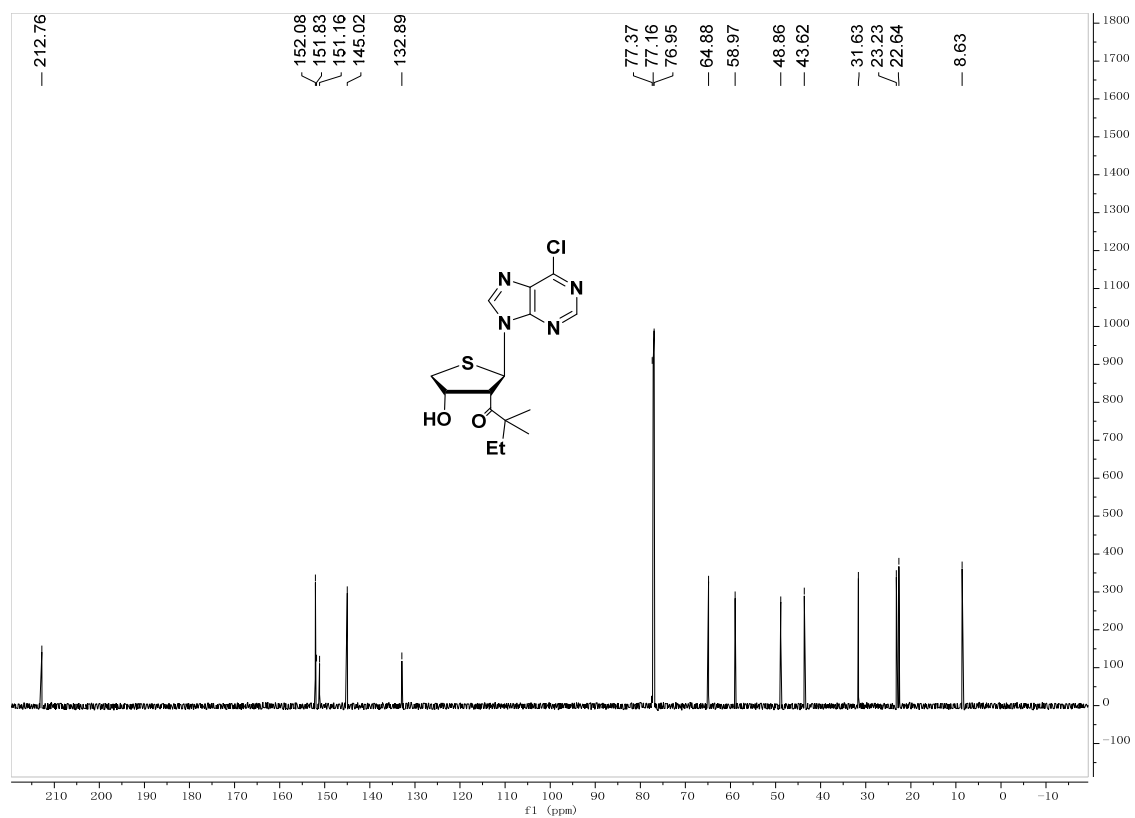

### $^1\text{H}$ NMR of 3m (600 MHz, $\text{CDCl}_3$ )

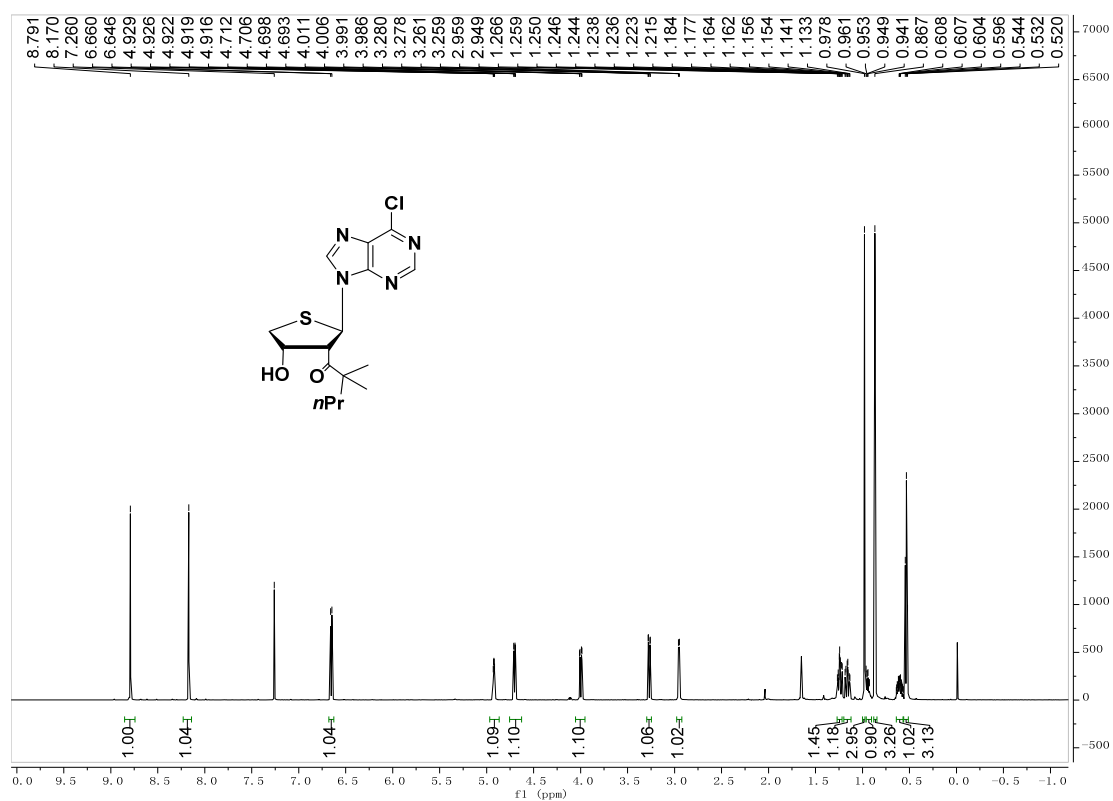

### $^{13}\text{C}$ NMR of 3m (150 MHz, $\text{CDCl}_3$ )

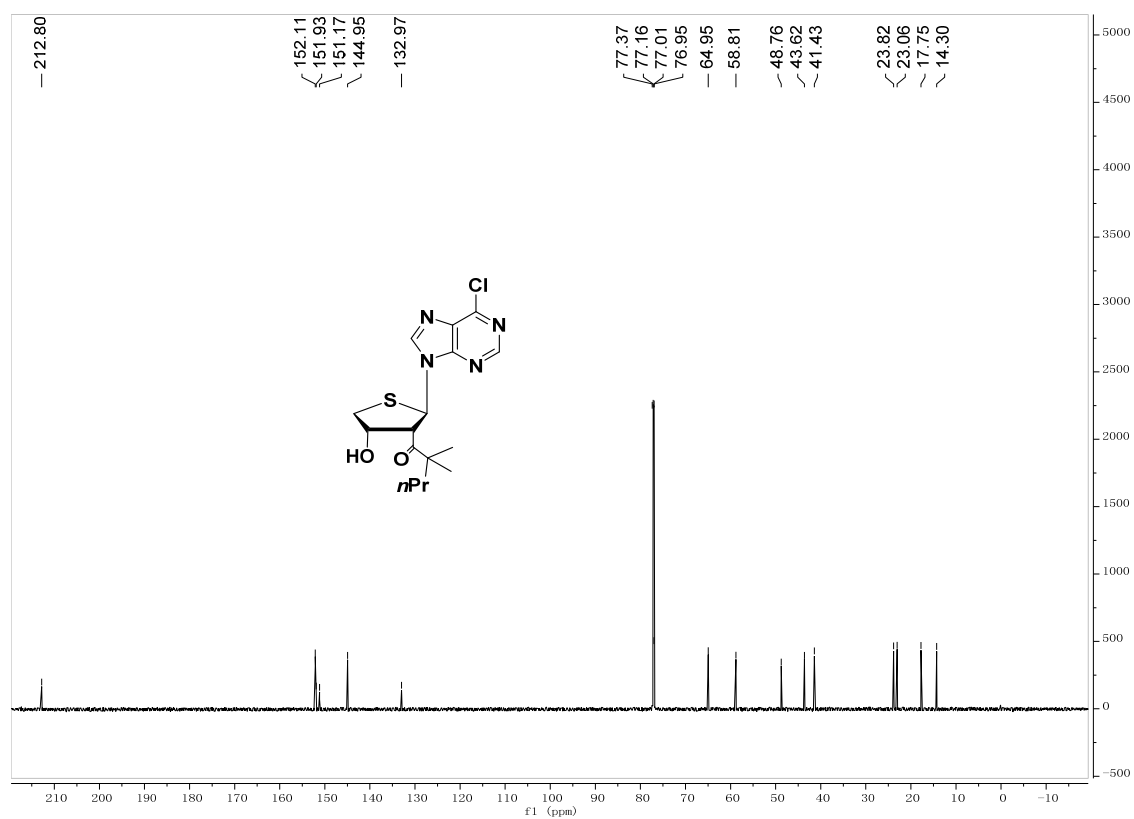

**<sup>1</sup>H NMR of 3n (600 MHz, CDCl<sub>3</sub>)**

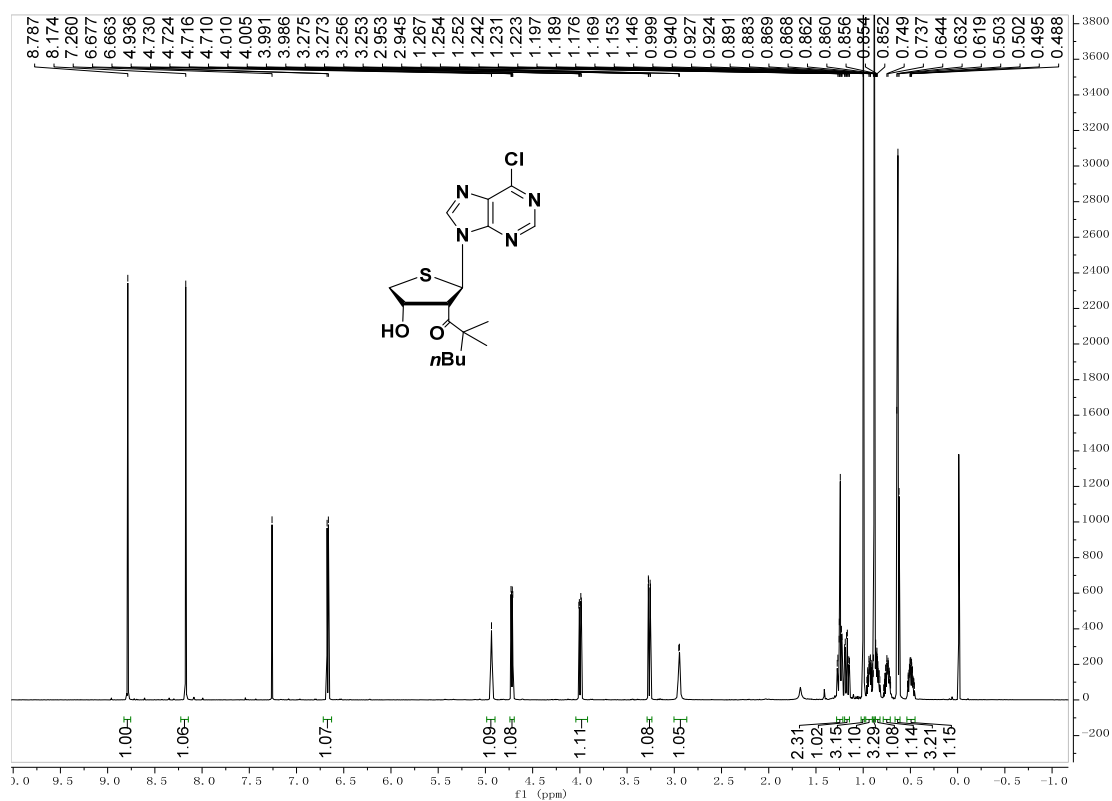

**<sup>13</sup>C NMR of 3n (150 MHz, CDCl<sub>3</sub>)**

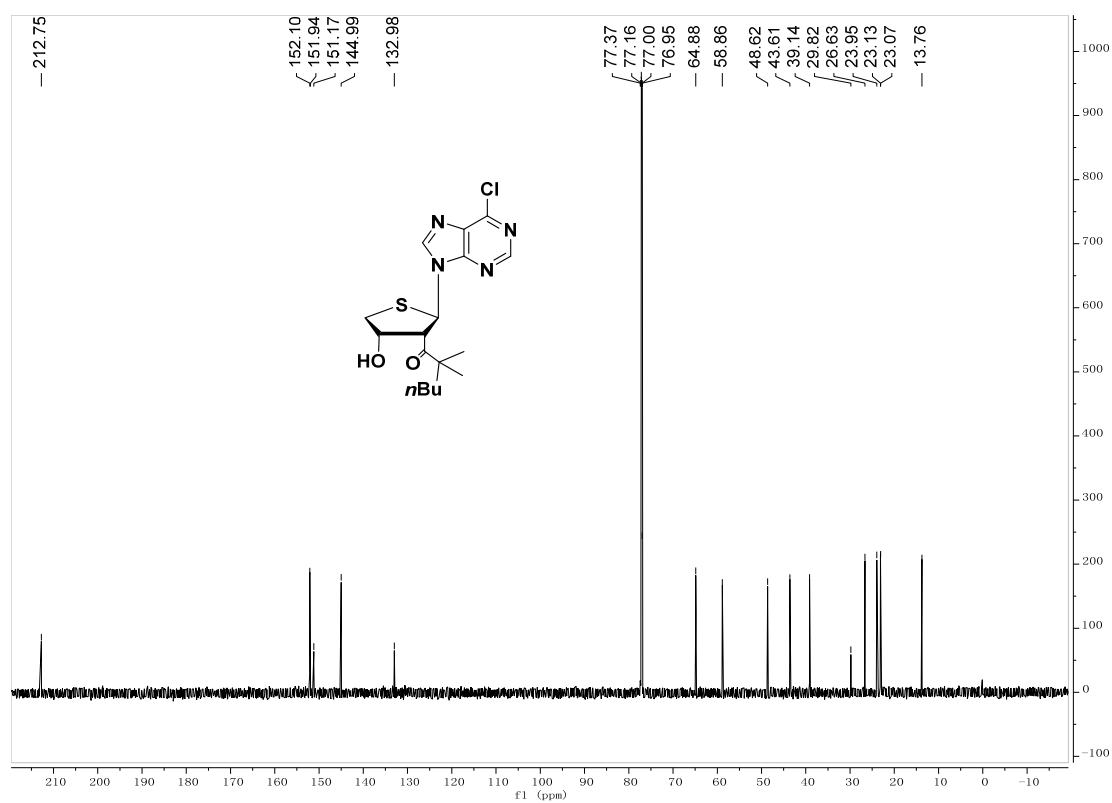

### <sup>1</sup>H NMR of 3o (600 MHz, CDCl<sub>3</sub>)

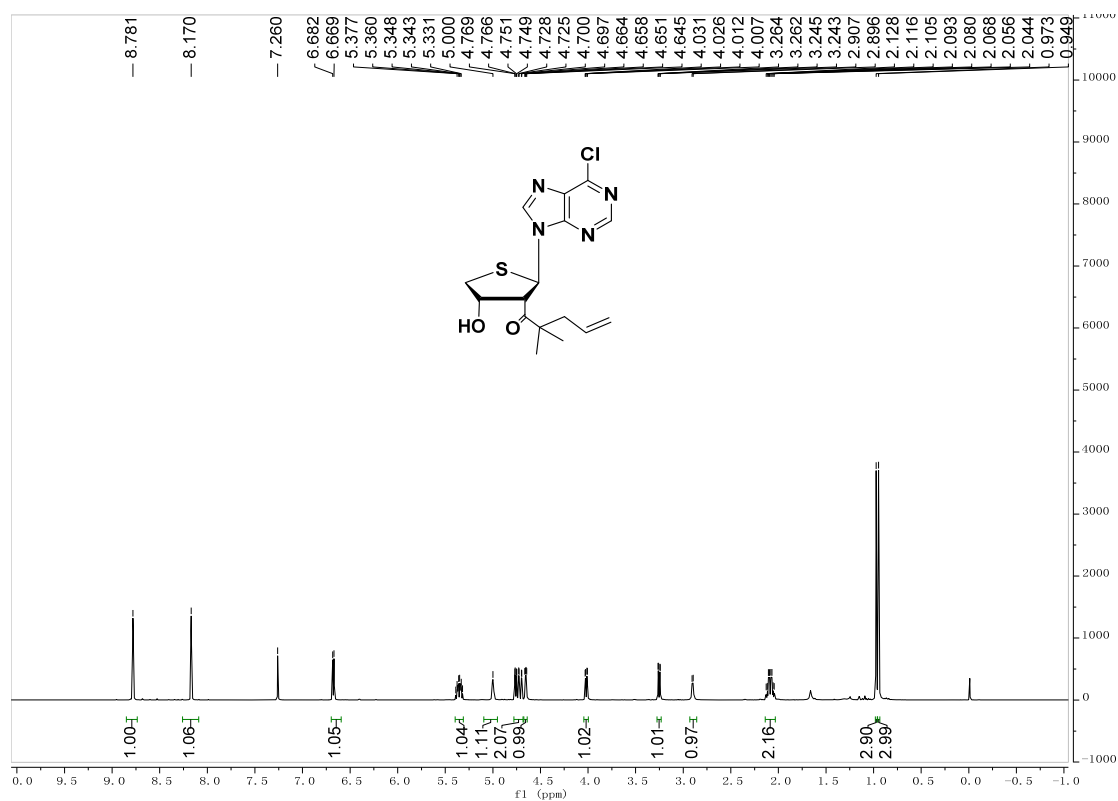

### <sup>13</sup>C NMR of 3o (150 MHz, CDCl<sub>3</sub>)

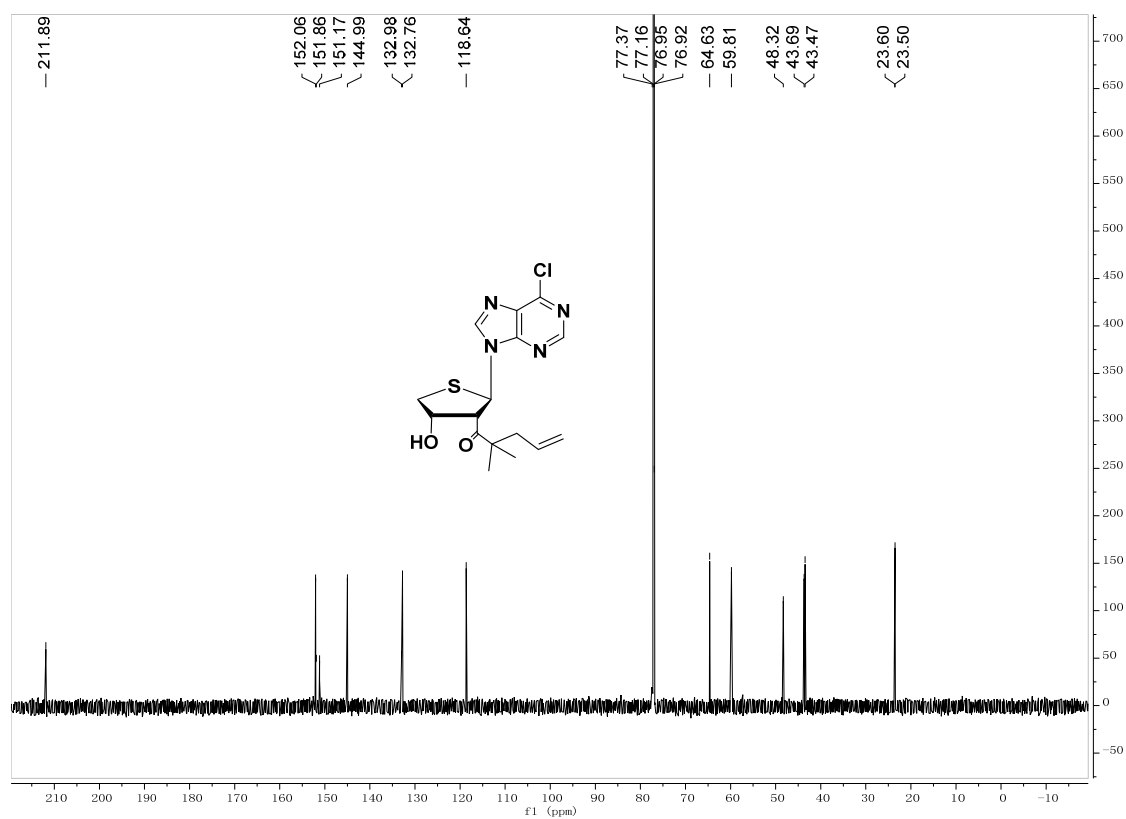



### <sup>1</sup>H NMR of 3p (600 MHz, CDCl<sub>3</sub>)

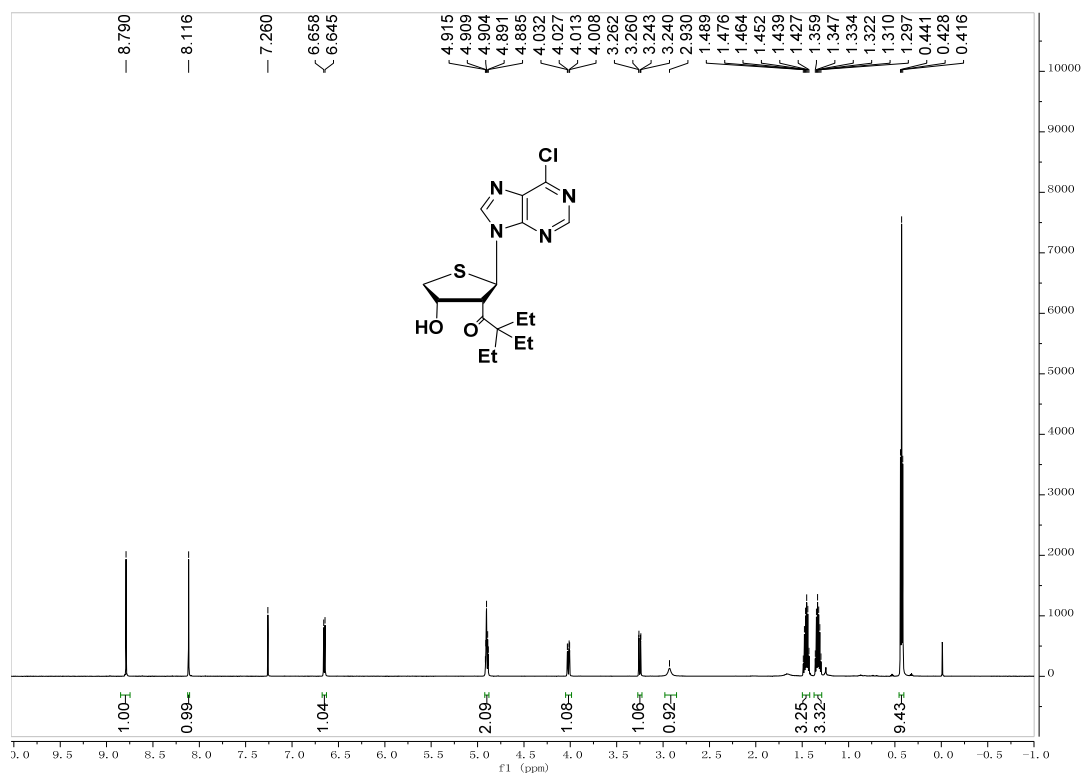

### <sup>13</sup>C NMR of 3p (150 MHz, CDCl<sub>3</sub>)

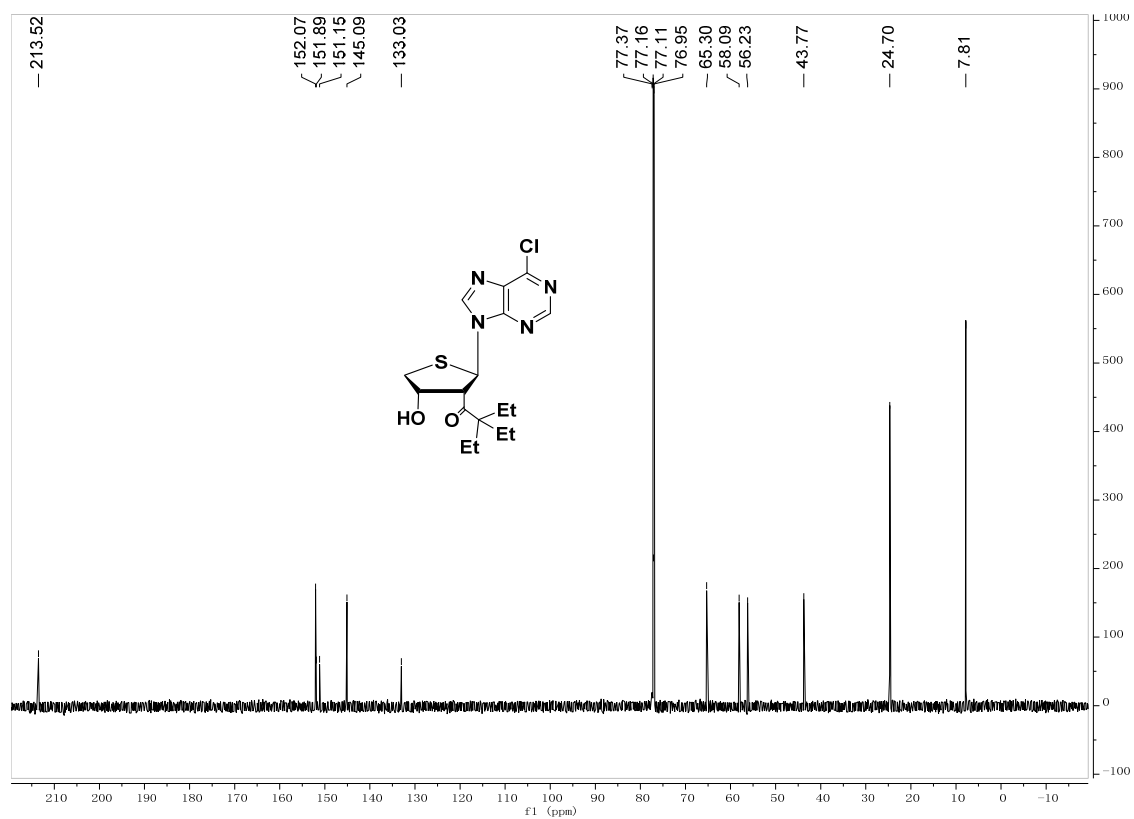

### <sup>1</sup>H NMR of 3q (600 MHz, CDCl<sub>3</sub>)

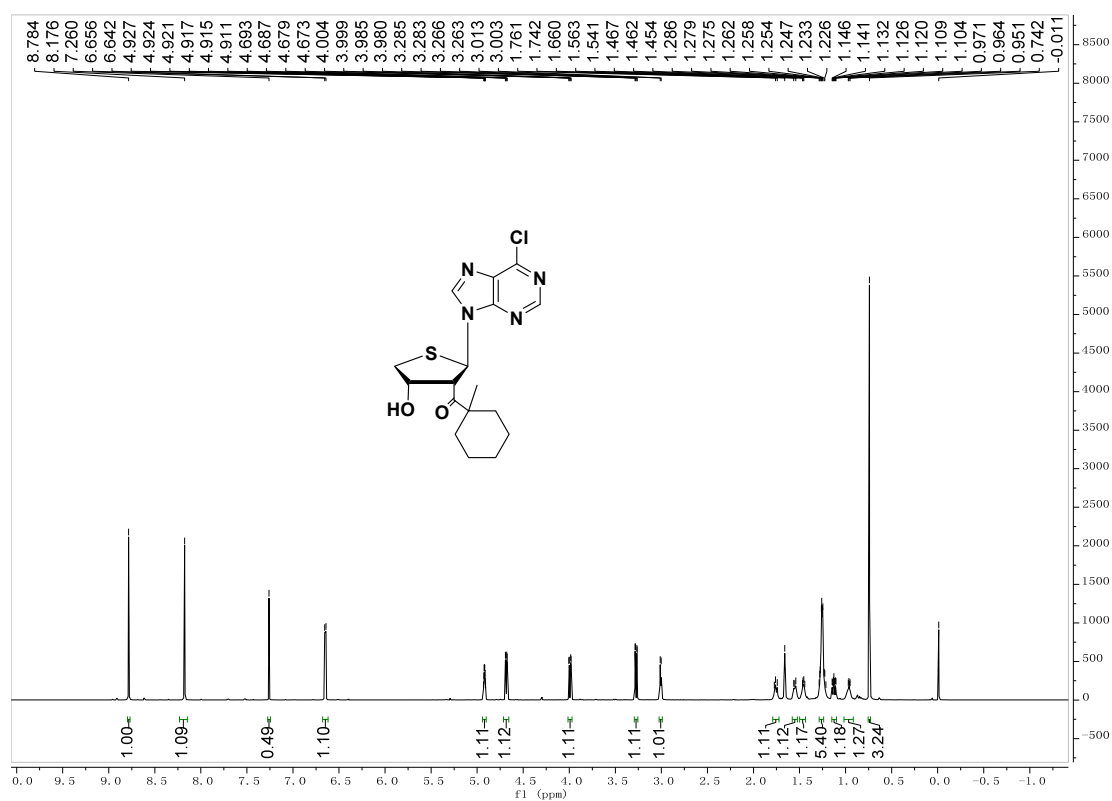

### <sup>13</sup>C NMR of 3q (100 MHz, CDCl<sub>3</sub>)

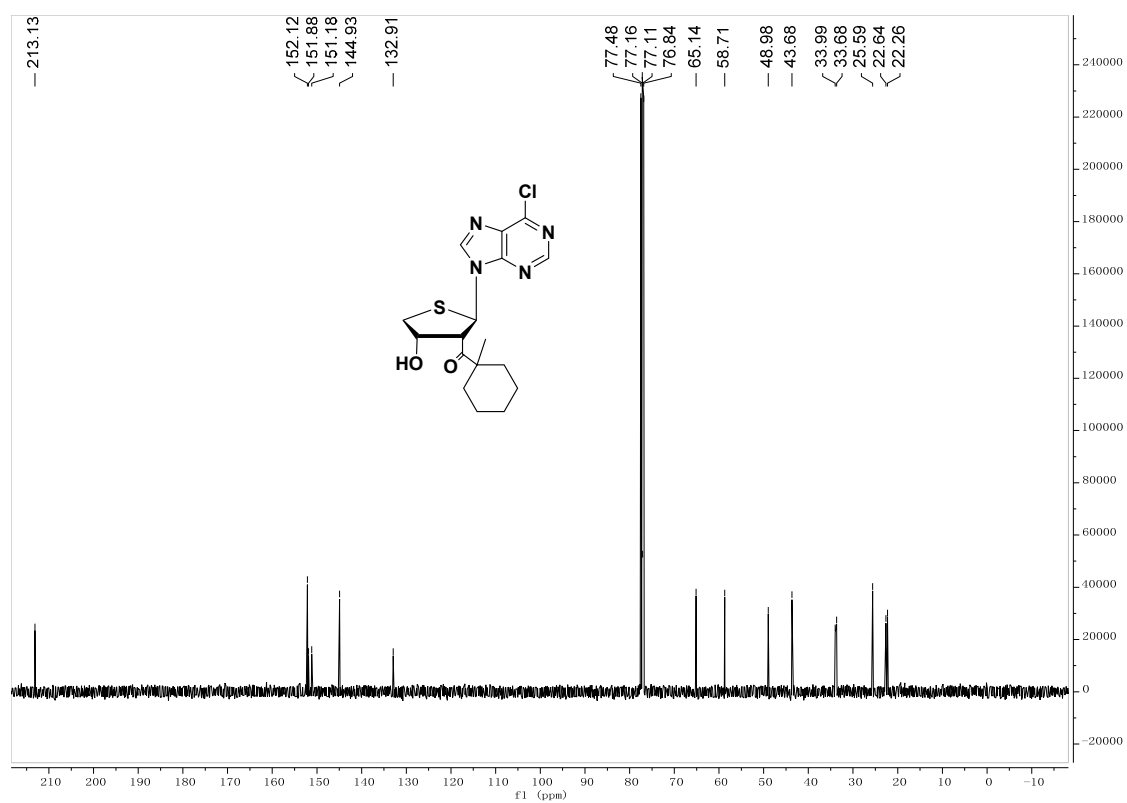

### $^1\text{H}$ NMR of 3r (600 MHz, $\text{CDCl}_3$ )

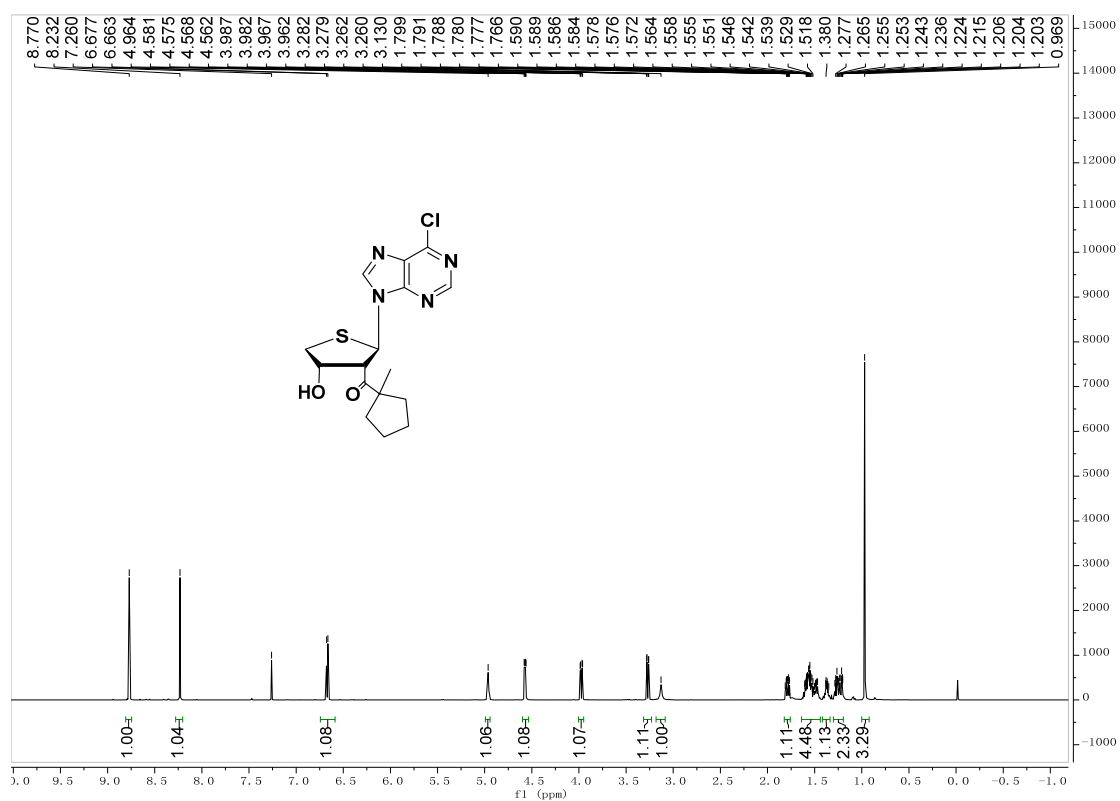

### $^{13}\text{C}$ NMR of 3r (150 MHz, $\text{CDCl}_3$ )

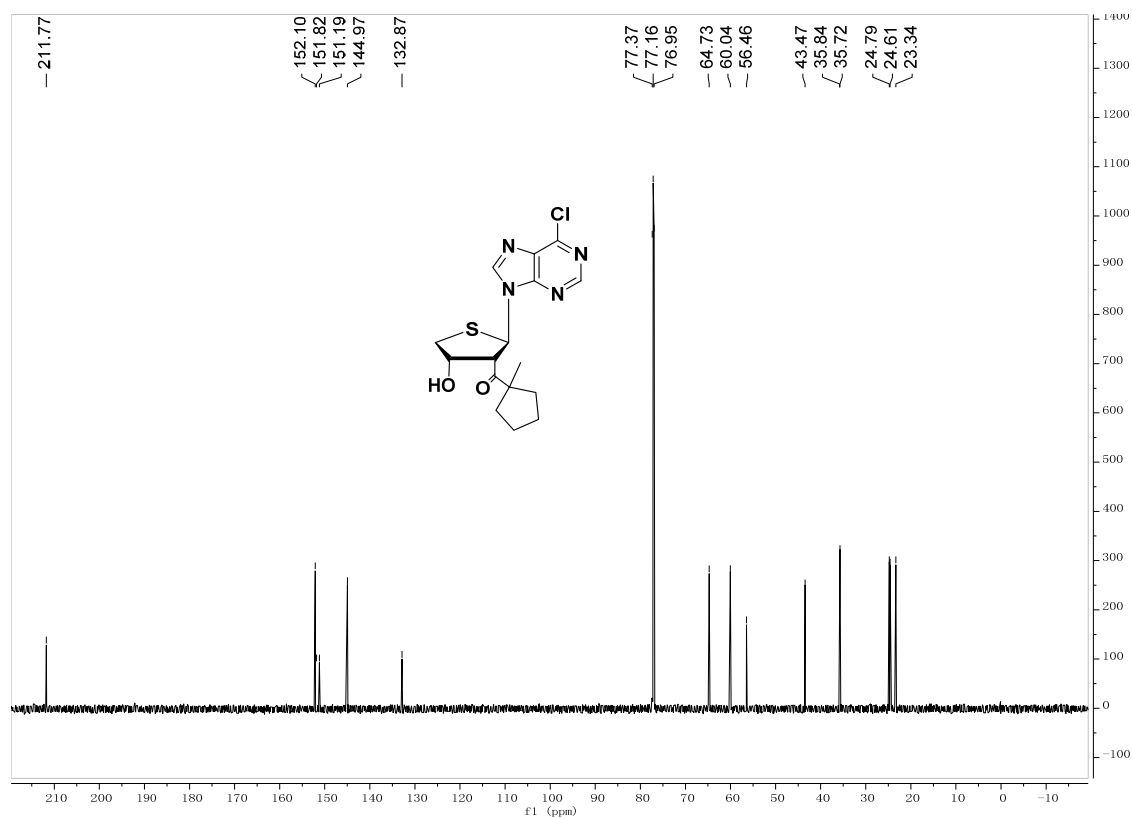

### $^1\text{H}$ NMR of **3s** (600 MHz, $\text{CDCl}_3$ )

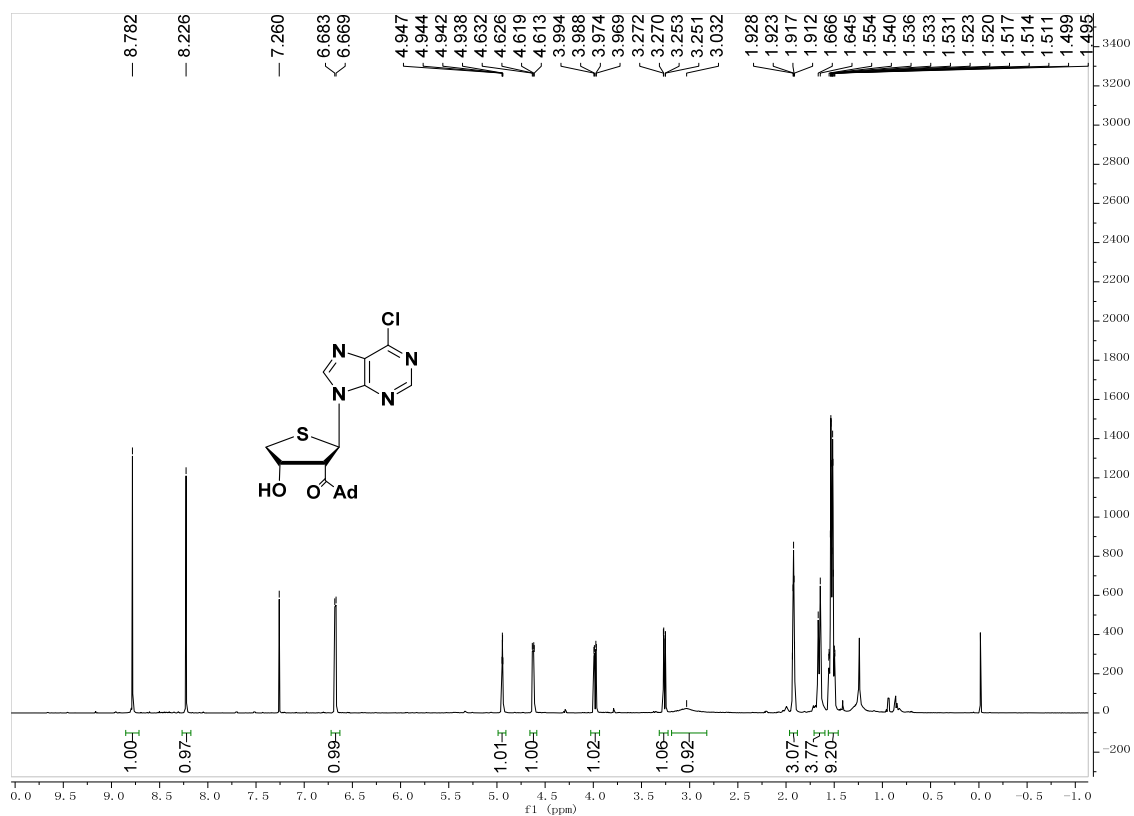

### $^{13}\text{C}$ NMR of **3s** (150 MHz, $\text{CDCl}_3$ )

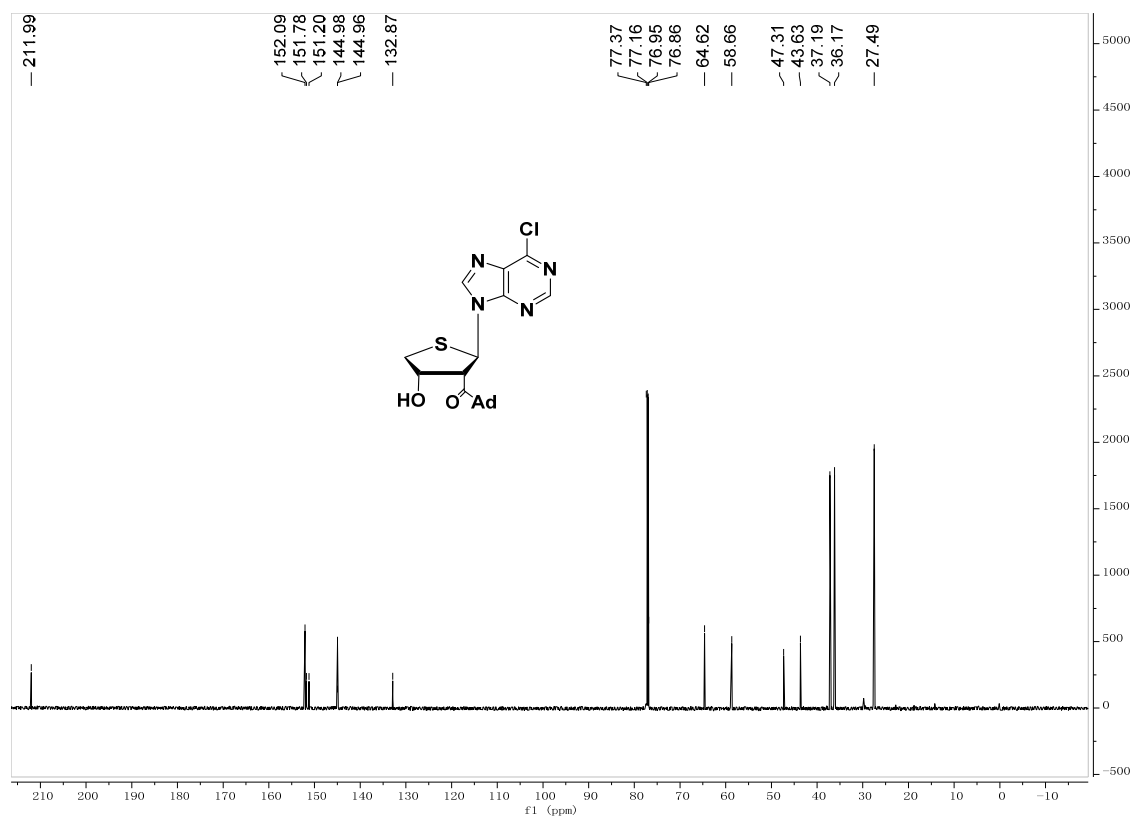

### $^1\text{H}$ NMR of 3t (600 MHz, $\text{CDCl}_3$ )

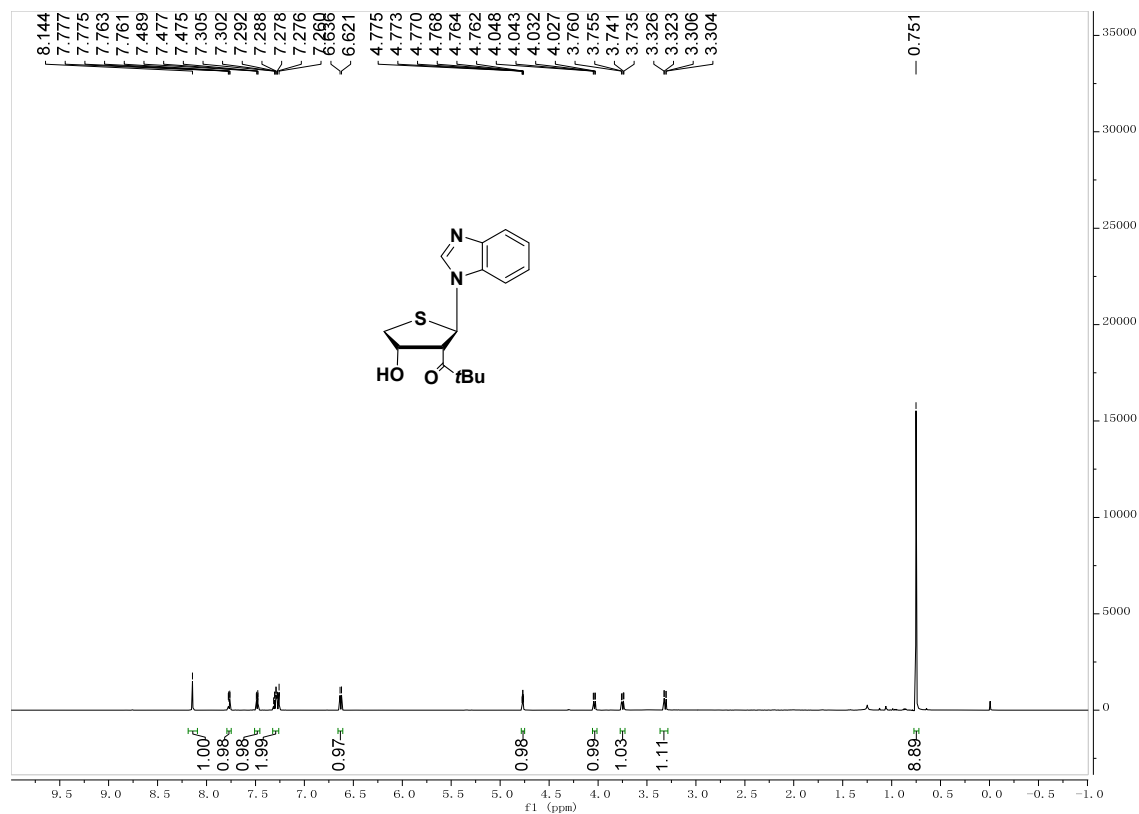

### $^{13}\text{C}$ NMR of 3t (100 MHz, $\text{CDCl}_3$ )

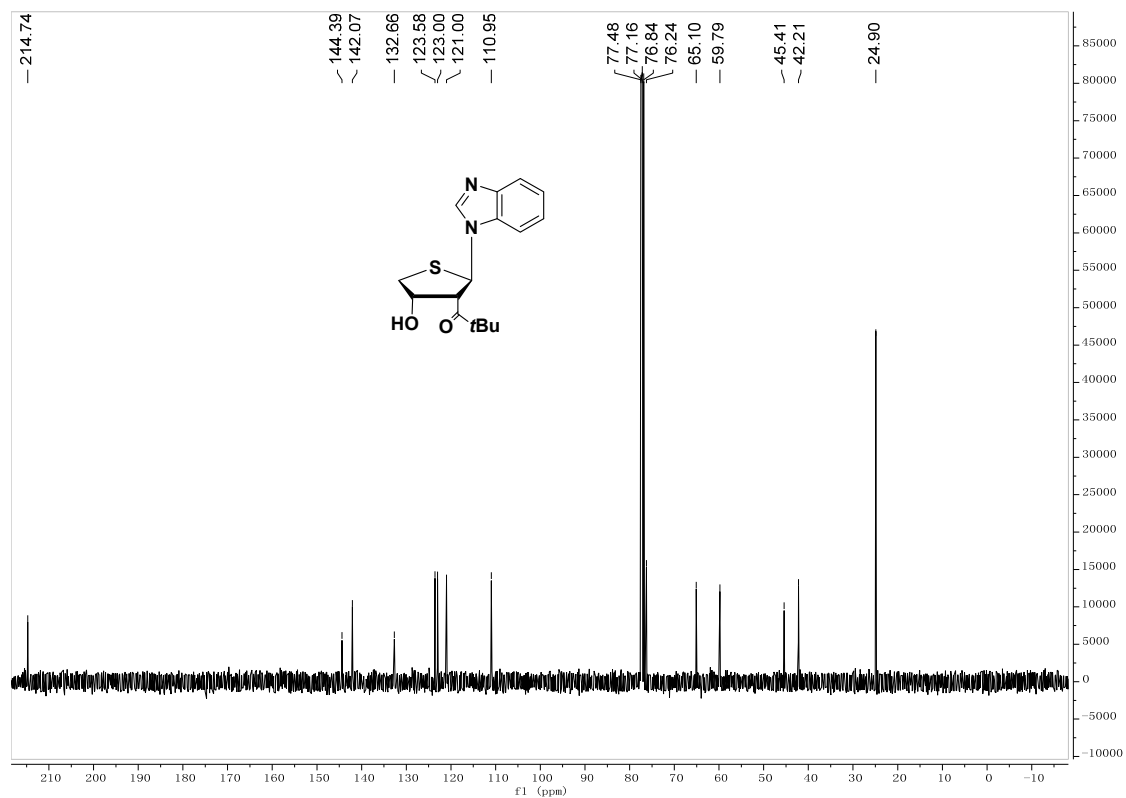

### <sup>1</sup>H NMR of 3u (400 MHz, CDCl<sub>3</sub>)

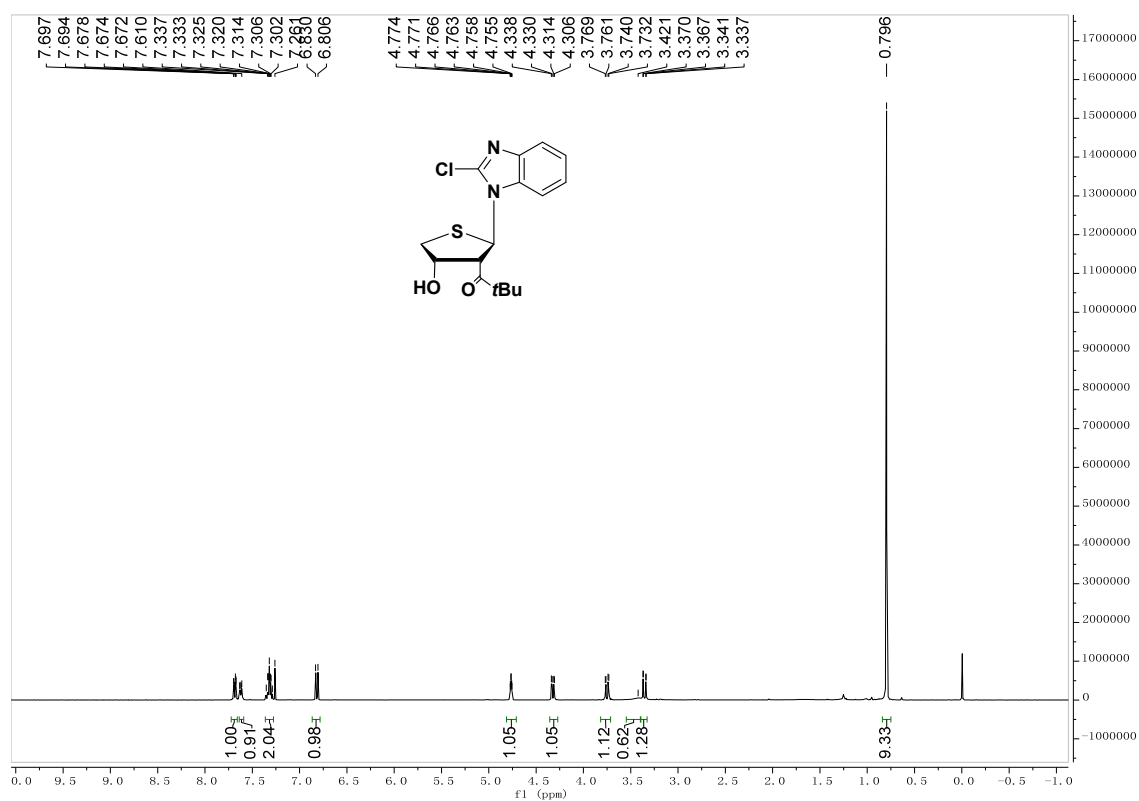

### <sup>13</sup>C NMR of 3u (150 MHz, CDCl<sub>3</sub>)

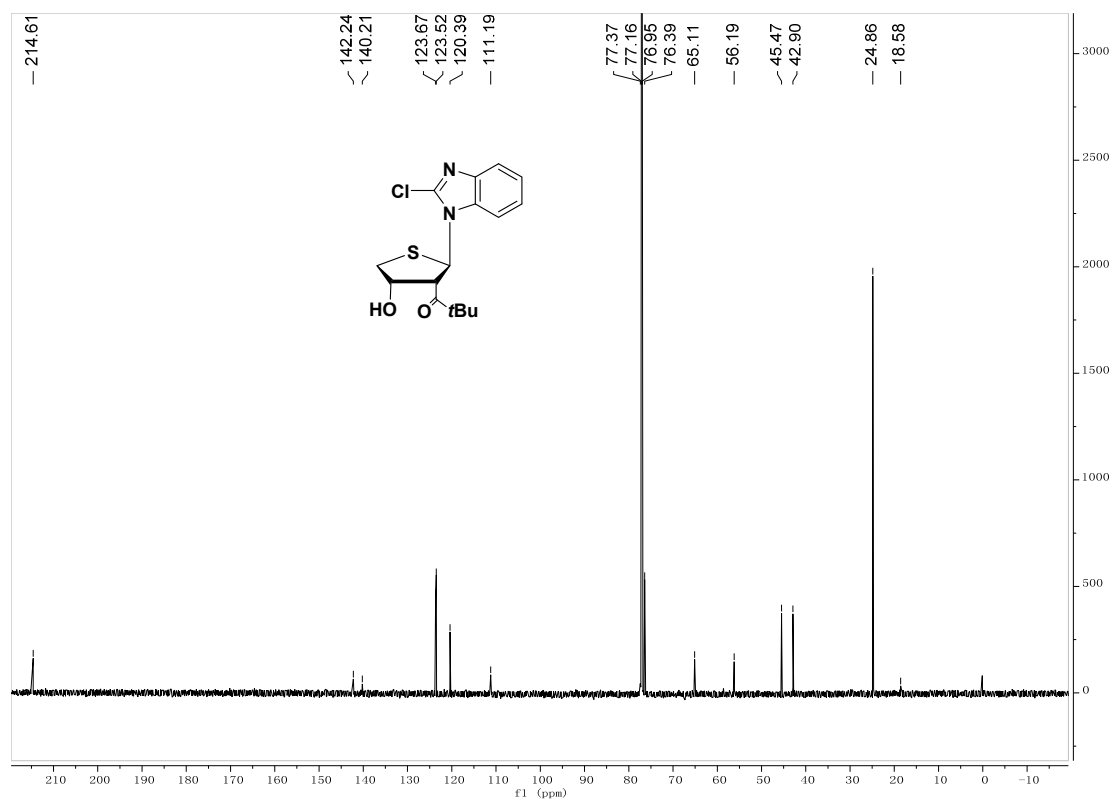

### <sup>1</sup>H NMR of 3v (600 MHz, CDCl<sub>3</sub>)

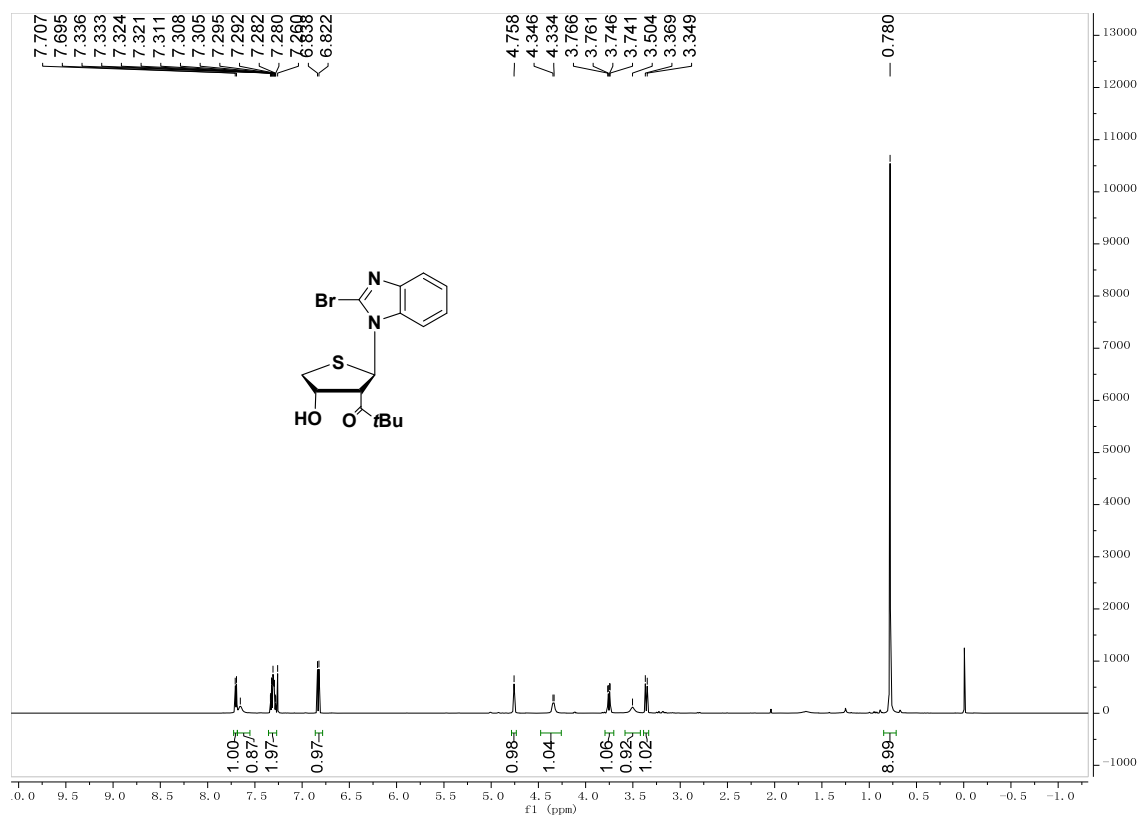

### <sup>13</sup>C NMR of 3v (150 MHz, CDCl<sub>3</sub>)

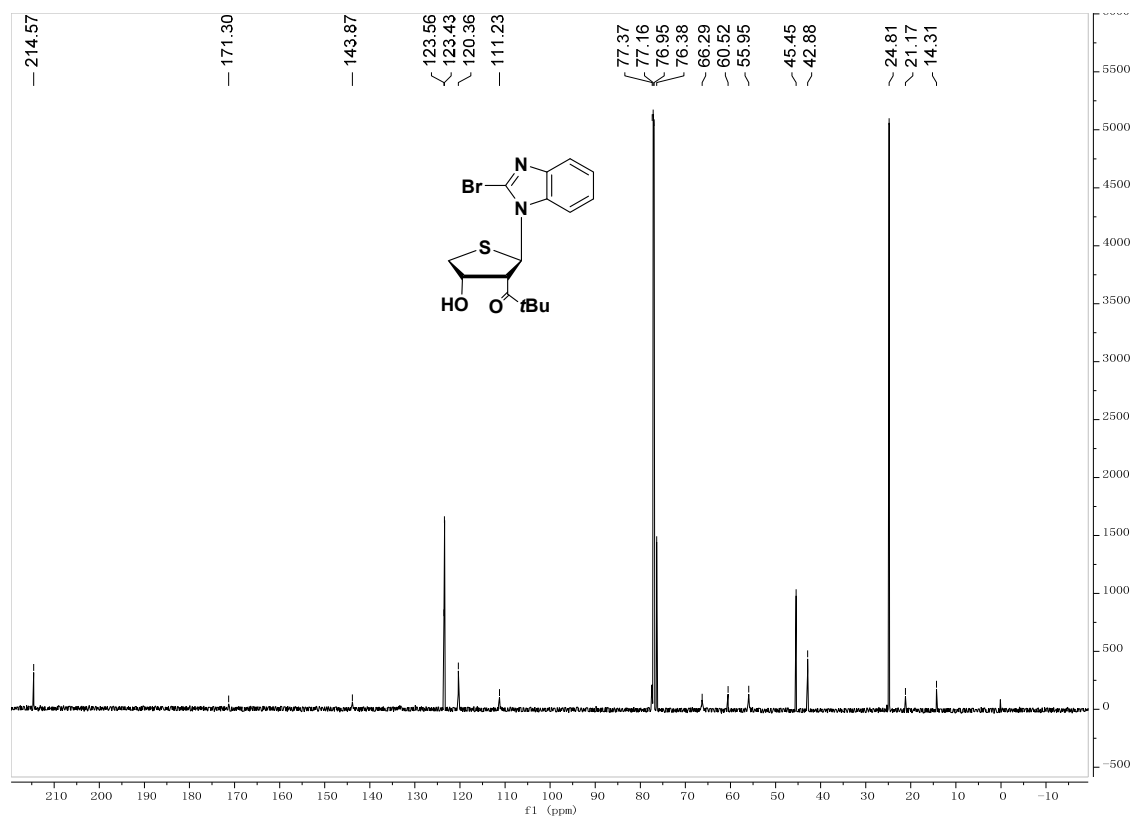

### <sup>1</sup>H NMR of 3w (600 MHz, CDCl<sub>3</sub>)

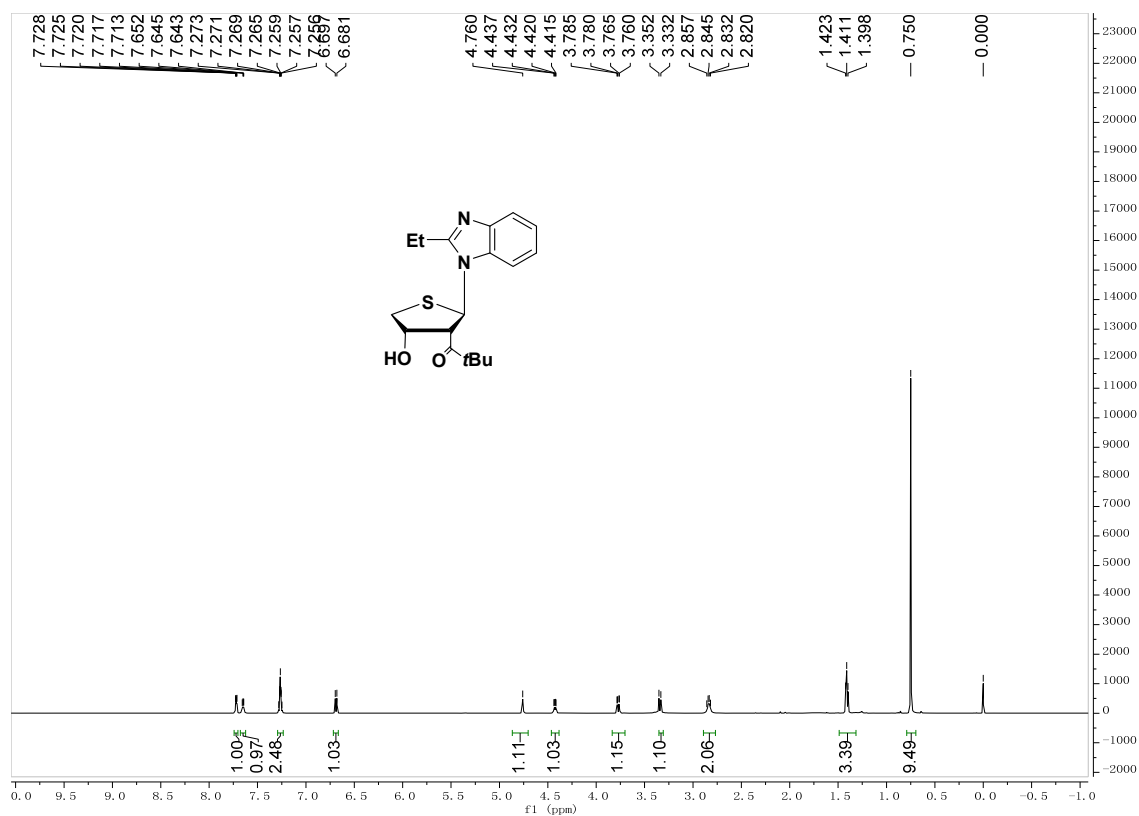

### <sup>13</sup>C NMR of 3w (150 MHz, CDCl<sub>3</sub>)

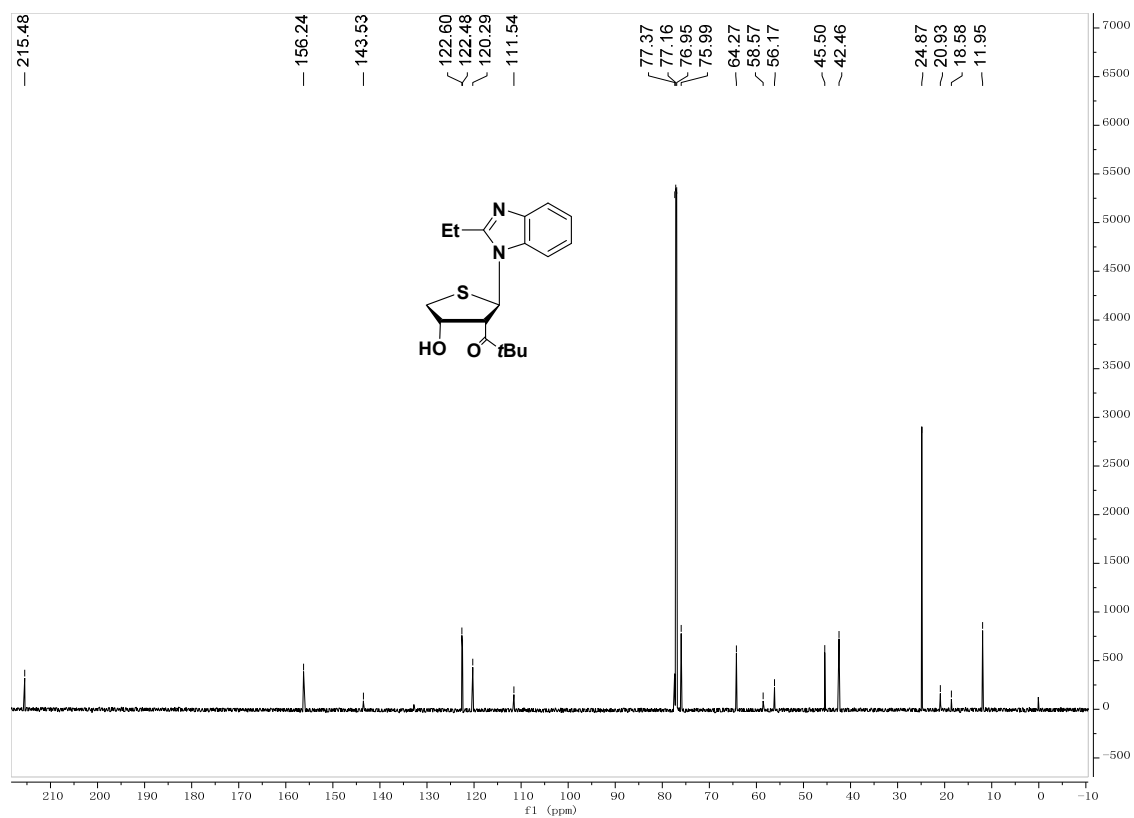



### <sup>1</sup>H NMR of 3x (600 MHz, CDCl<sub>3</sub>)

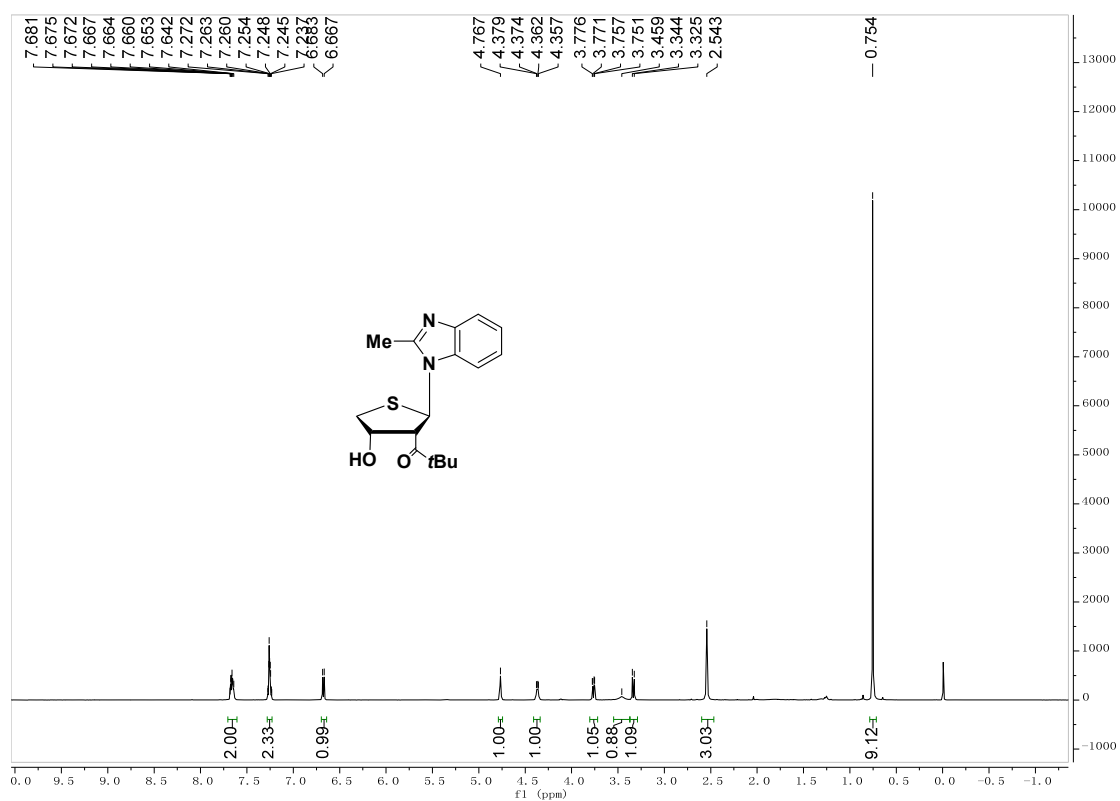

### <sup>13</sup>C NMR of 3x (150 MHz, CDCl<sub>3</sub>)

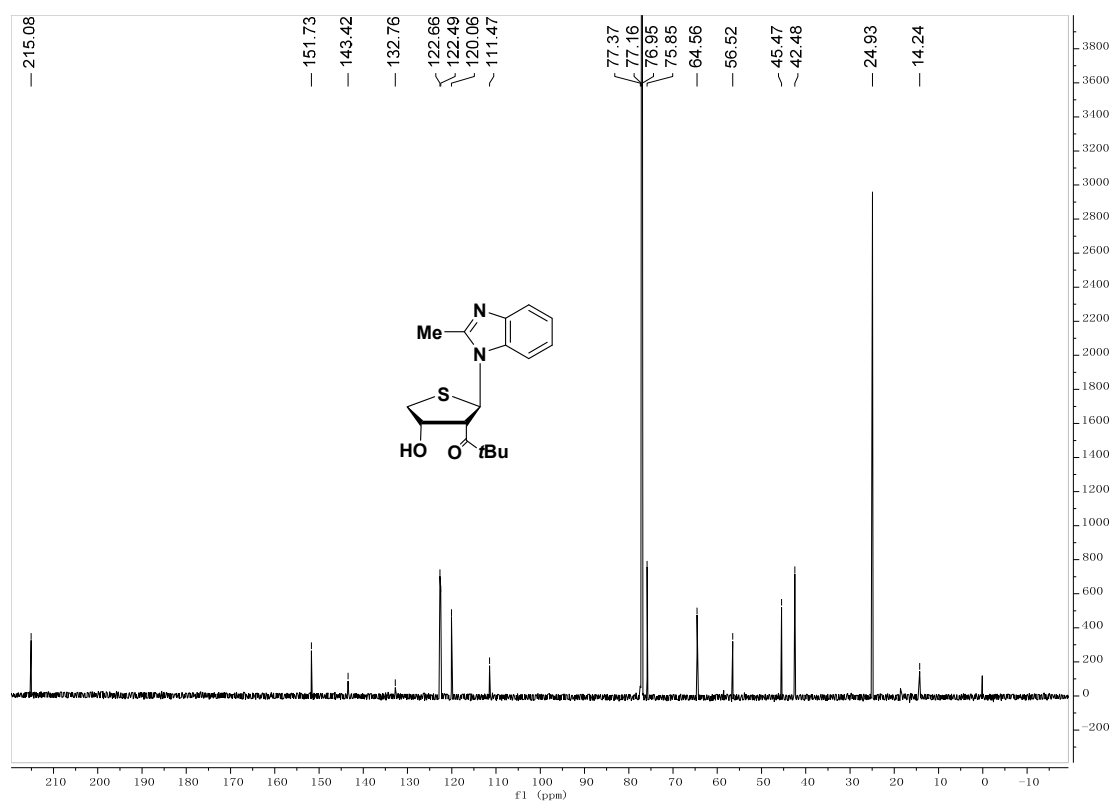

**<sup>1</sup>H NMR of 3y (600 MHz, CDCl<sub>3</sub>)**

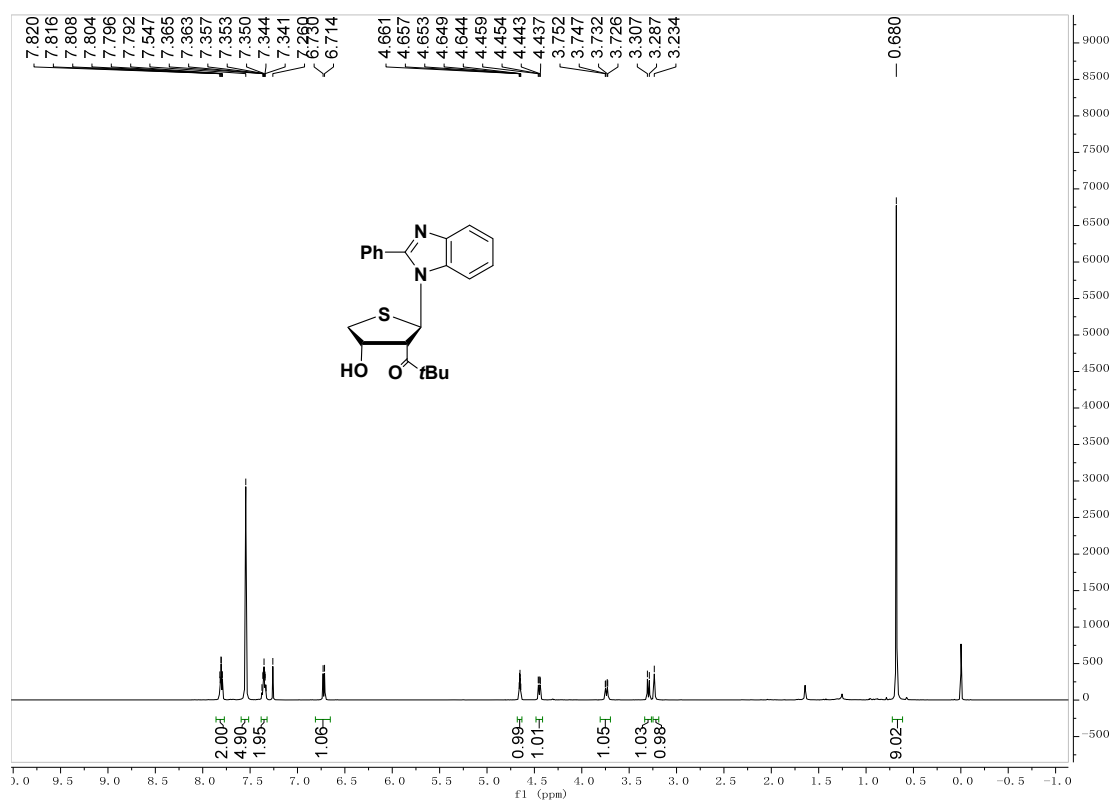

**<sup>13</sup>C NMR of 3y (150 MHz, CDCl<sub>3</sub>)**

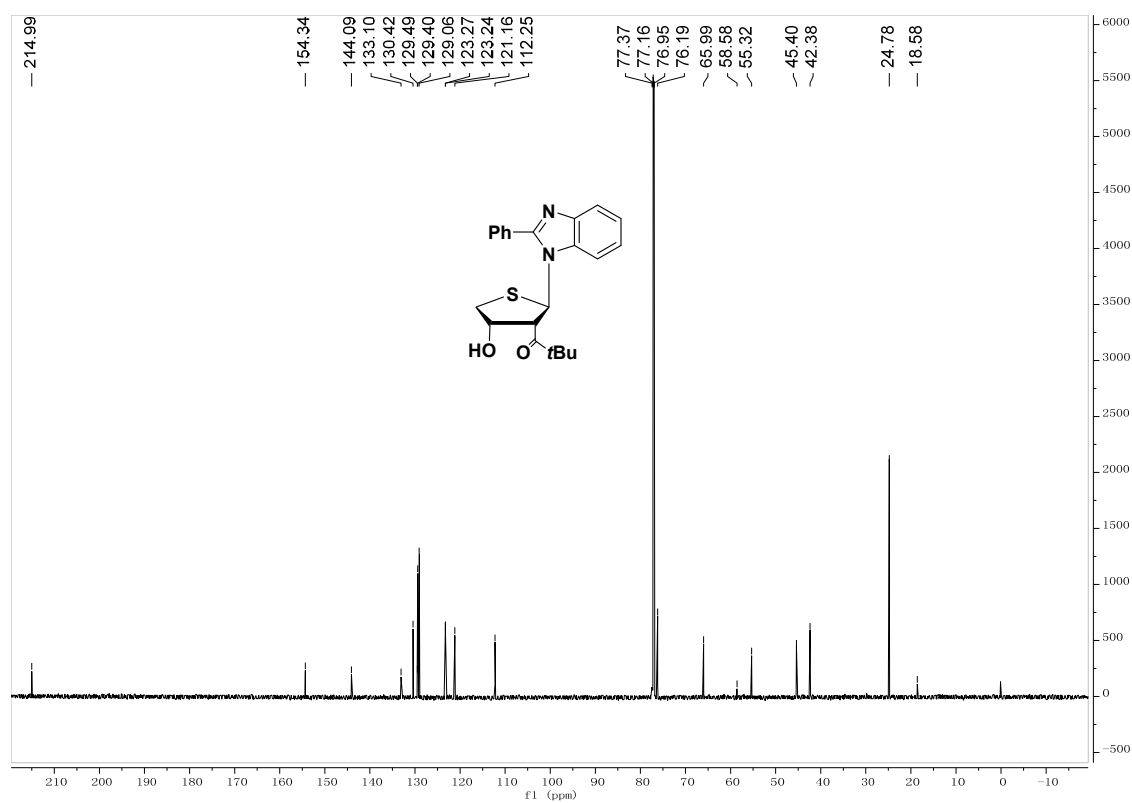

### $^1\text{H}$ NMR of **3z** (600 MHz, $\text{CDCl}_3$ )

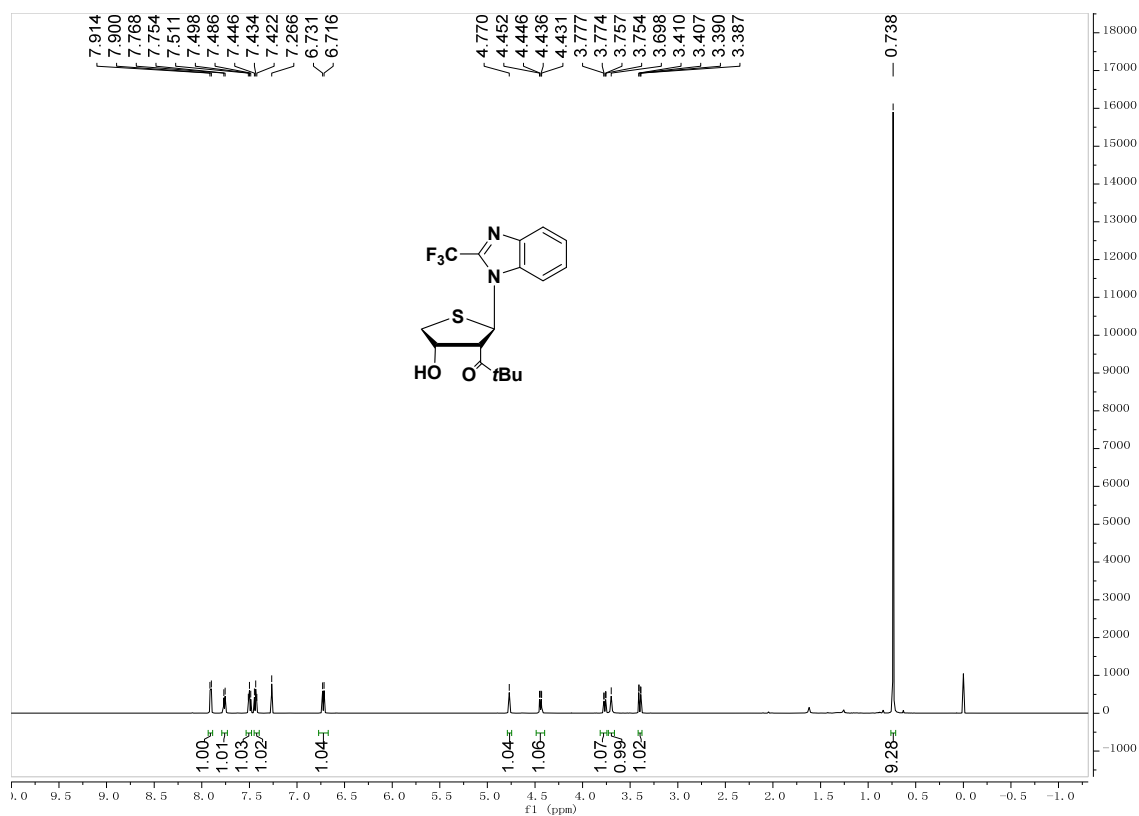

### $^{13}\text{C}$ NMR of **3z** (150 MHz, $\text{CDCl}_3$ )

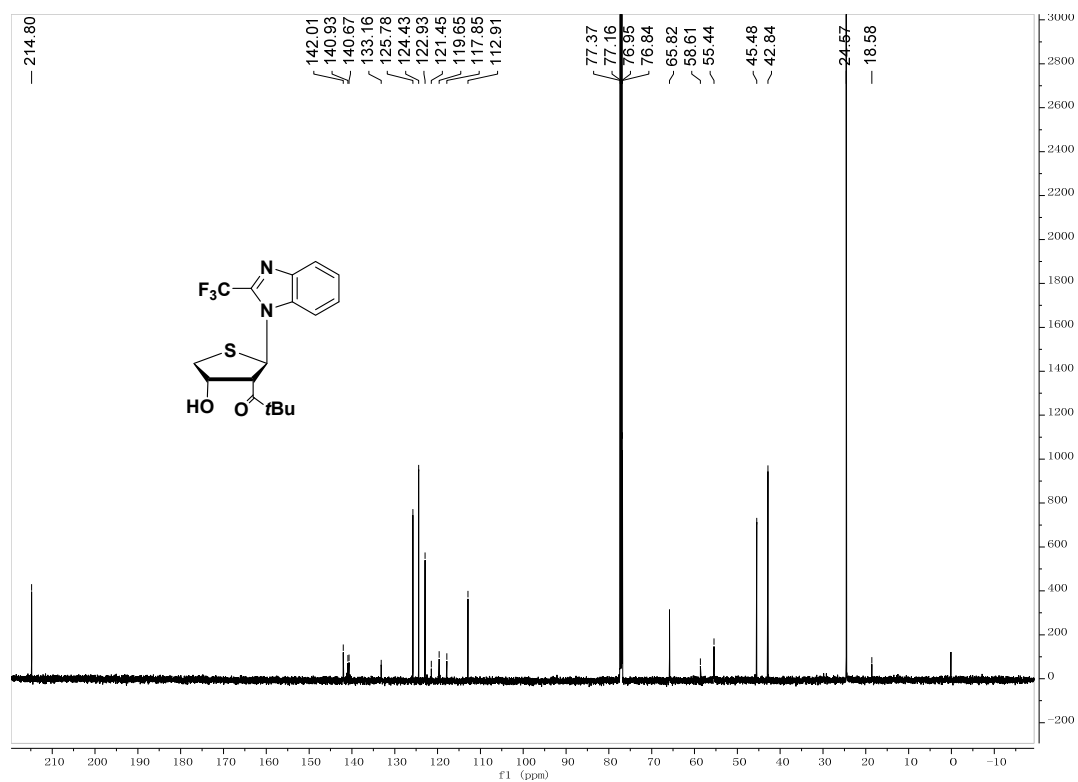

**<sup>19</sup>F NMR of 3z (565 MHz, CDCl<sub>3</sub>)**

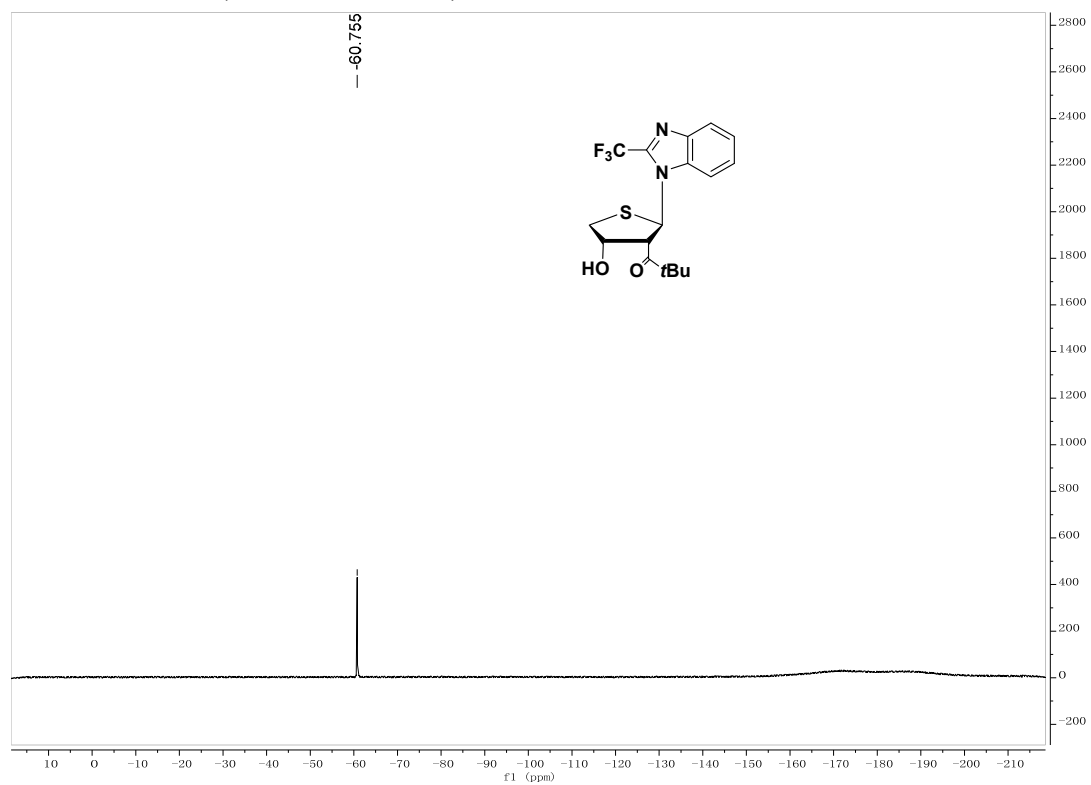

### <sup>1</sup>H NMR of 3aa (600 MHz, CDCl<sub>3</sub>)

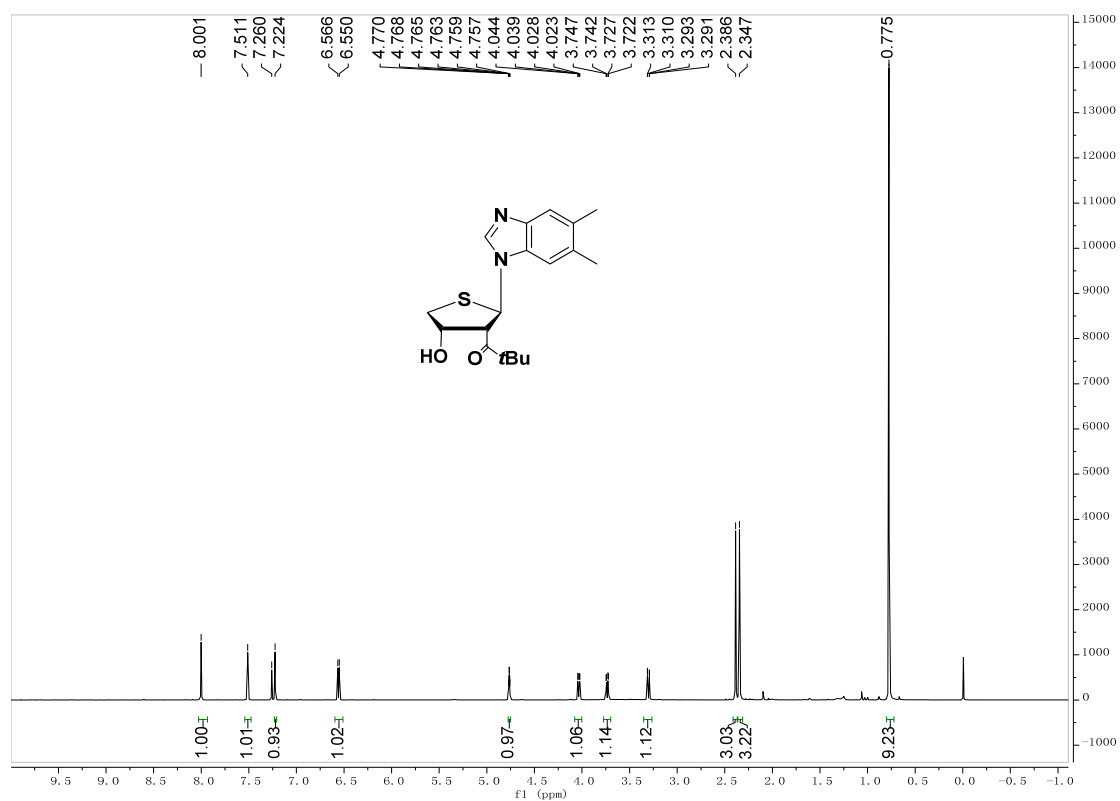

### <sup>13</sup>C NMR of 3aa (150 MHz, CDCl<sub>3</sub>)

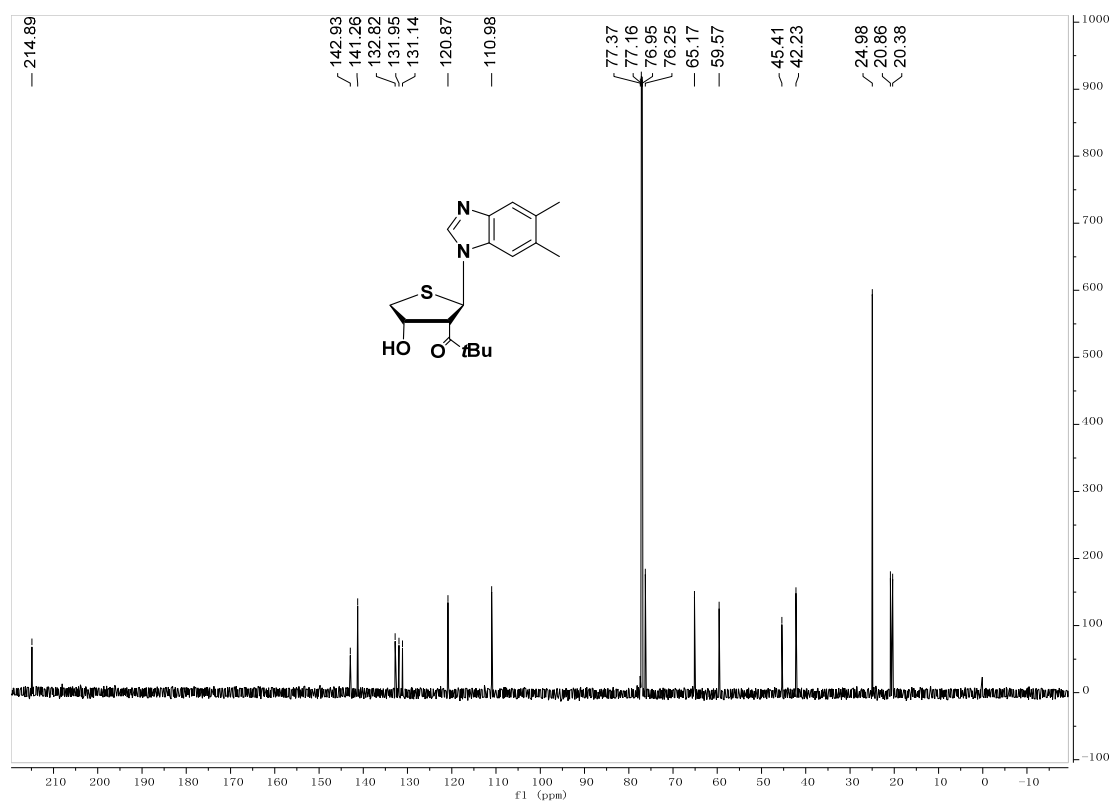

### <sup>1</sup>H NMR of 3ab (400 MHz, CDCl<sub>3</sub>)

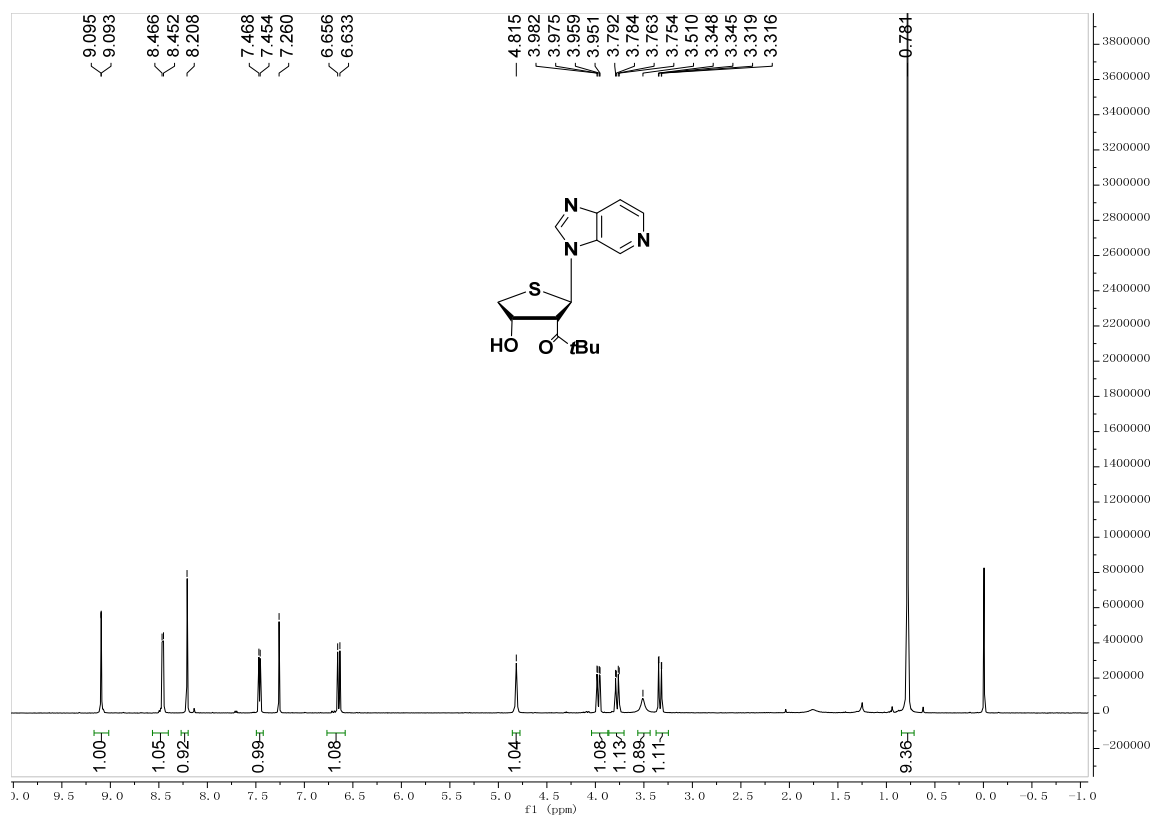

### <sup>13</sup>C NMR of 3ab (150 MHz, CDCl<sub>3</sub>)

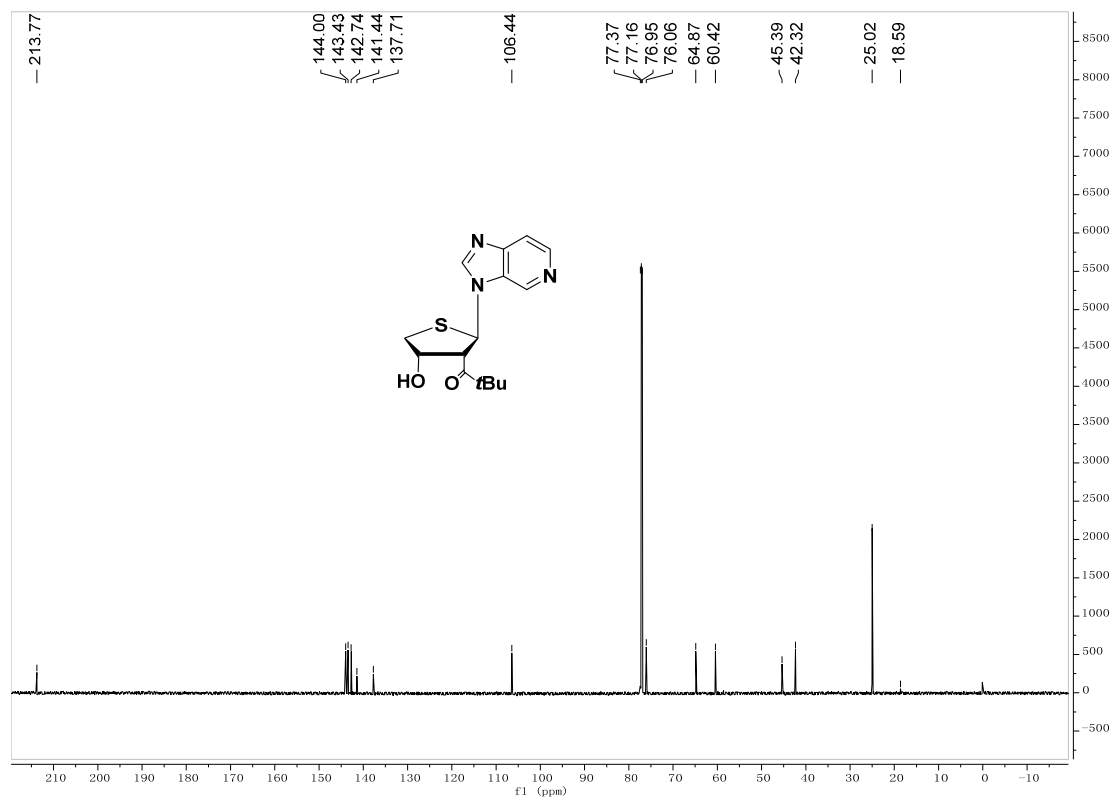

### $^1\text{H}$ NMR of **3ac** (600 MHz, $\text{CDCl}_3$ )

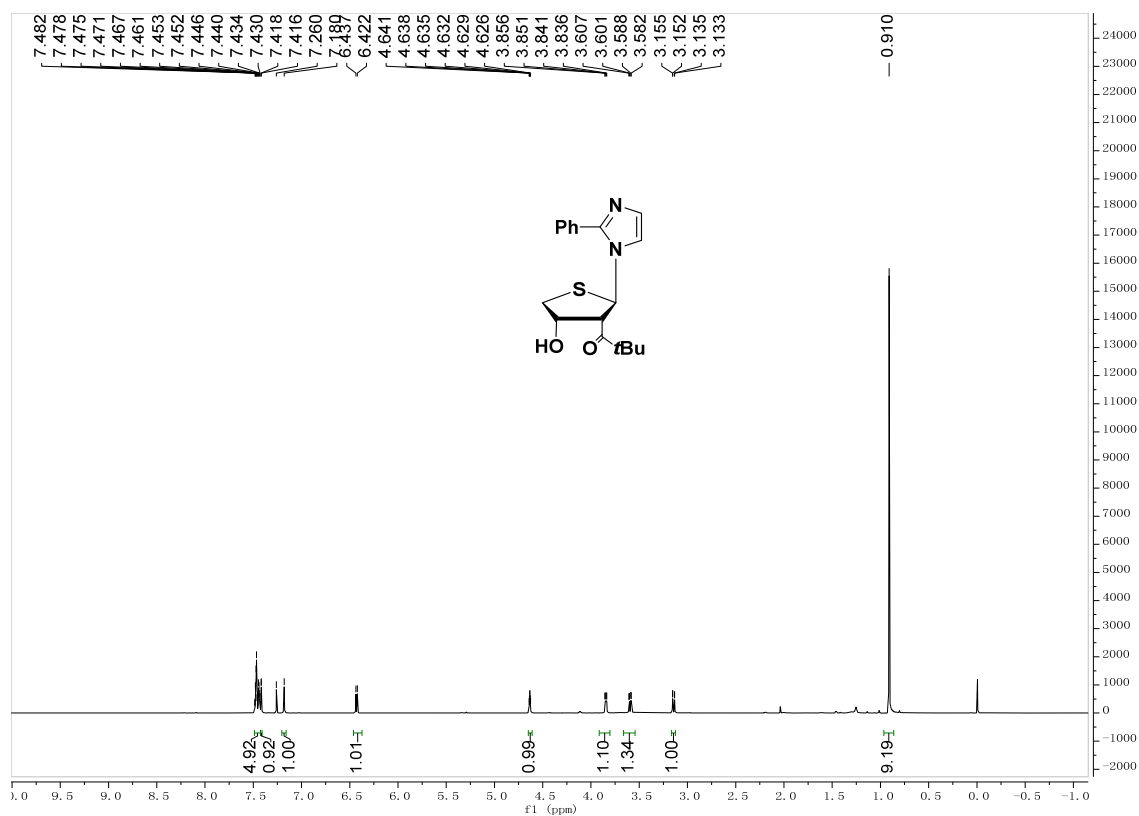

### $^{13}\text{C}$ NMR of **3ac** (150 MHz, $\text{CDCl}_3$ )

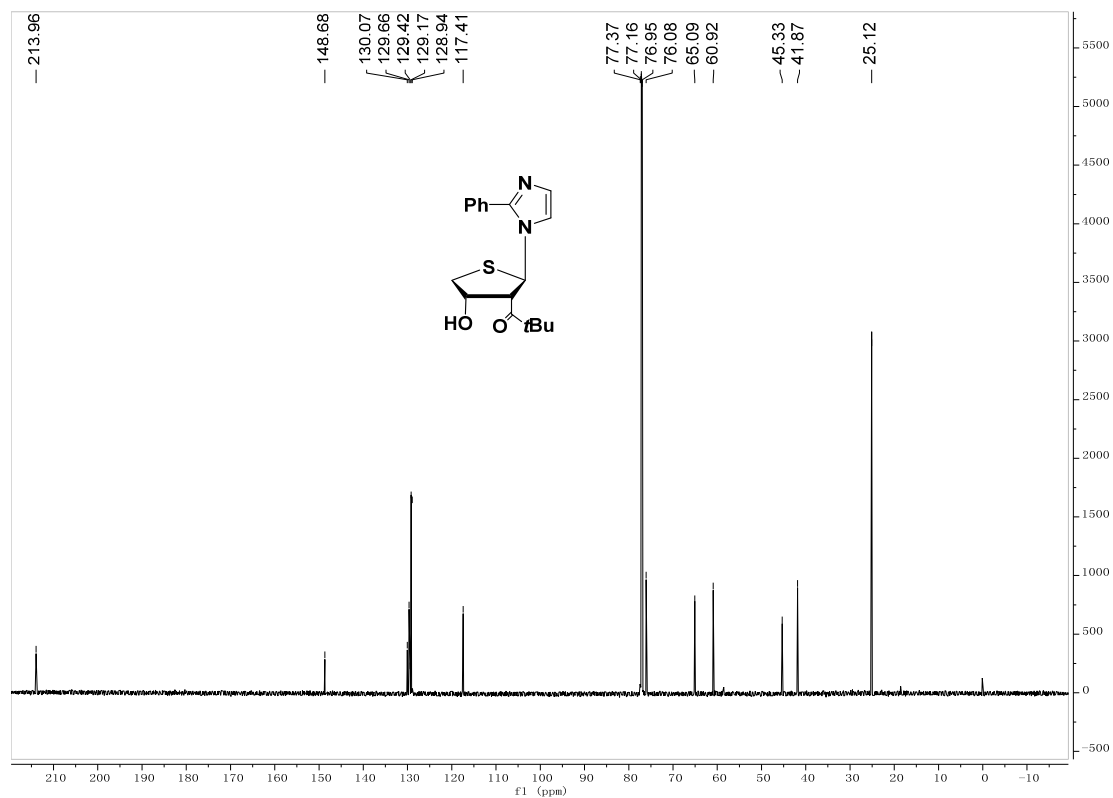

### $^1\text{H}$ NMR of 3ad (600 MHz, $\text{CDCl}_3$ )

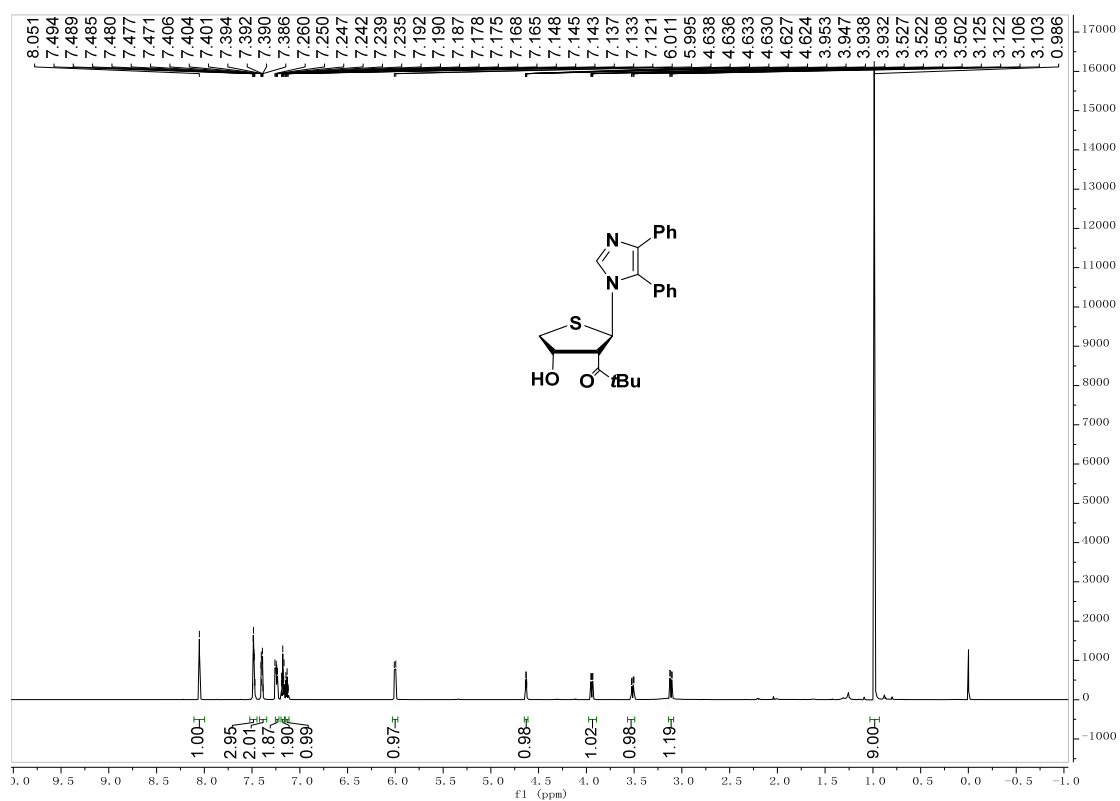

### $^{13}\text{C}$ NMR of 3ad (150 MHz, $\text{CDCl}_3$ )

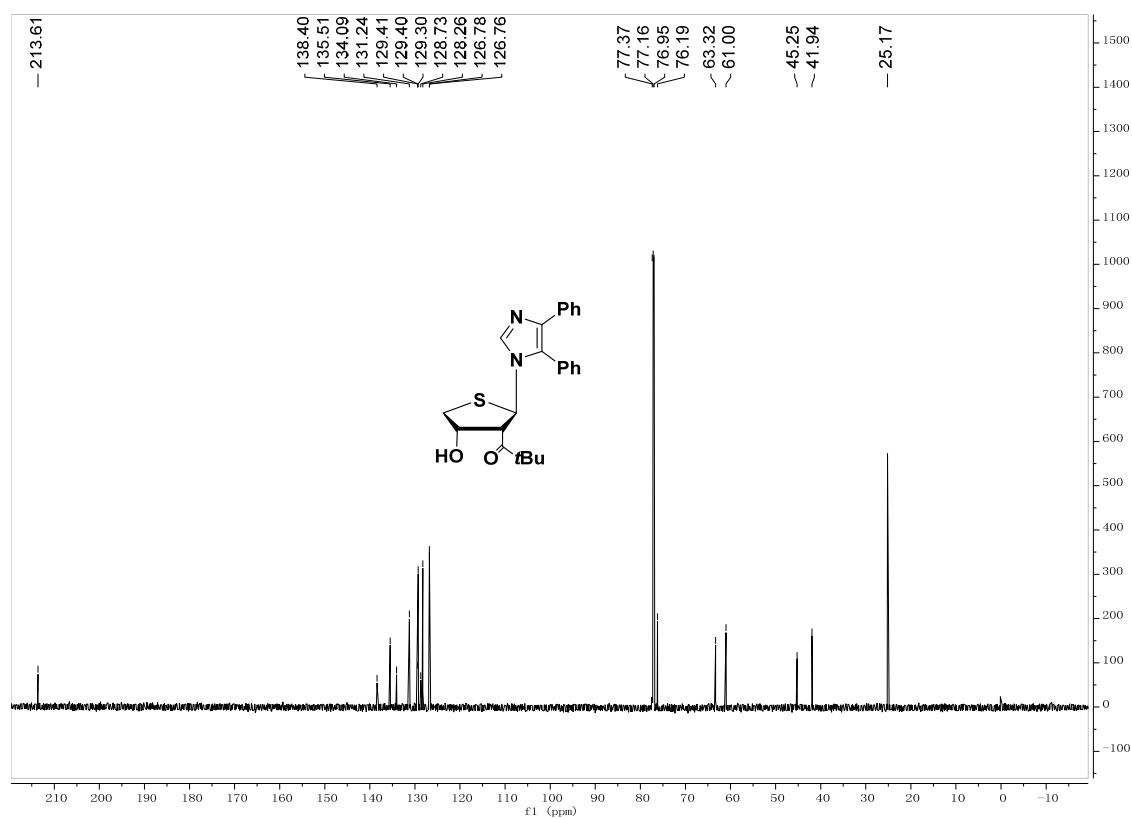



### <sup>1</sup>H NMR of 5a (400 MHz, CDCl<sub>3</sub>)

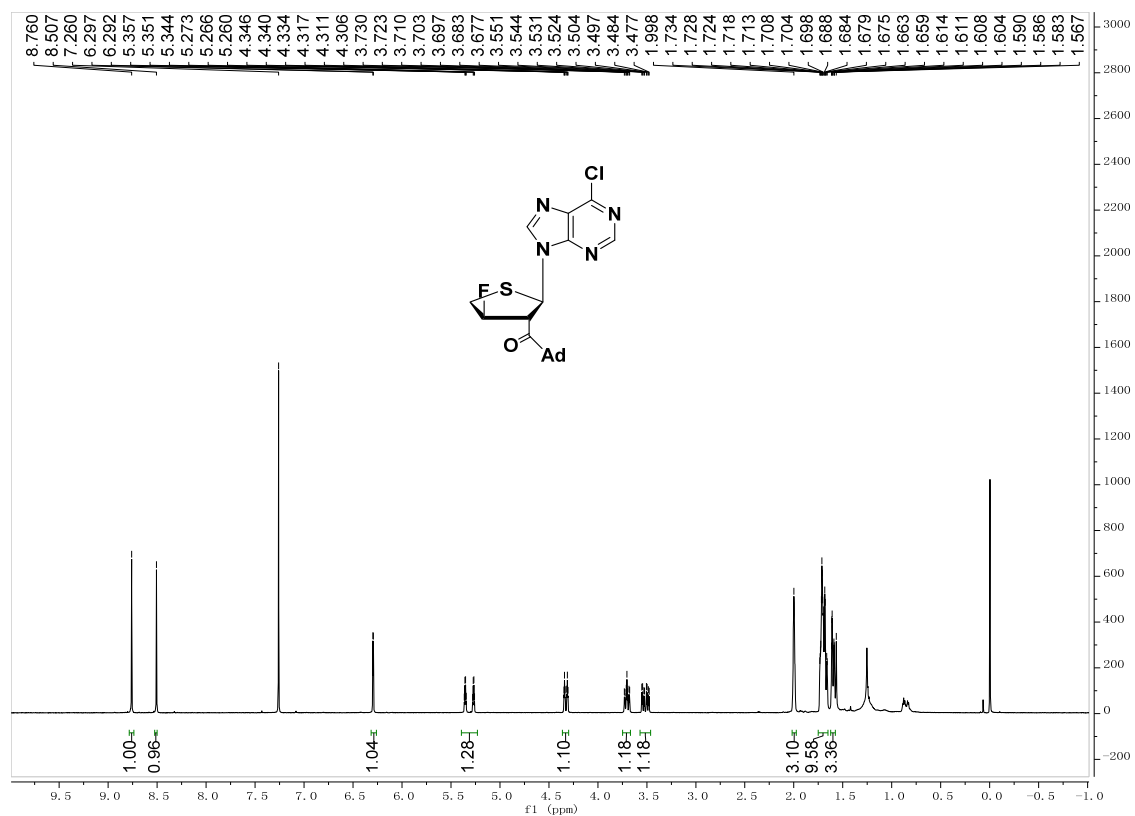

### <sup>13</sup>C NMR of 5a (100 MHz, CDCl<sub>3</sub>)

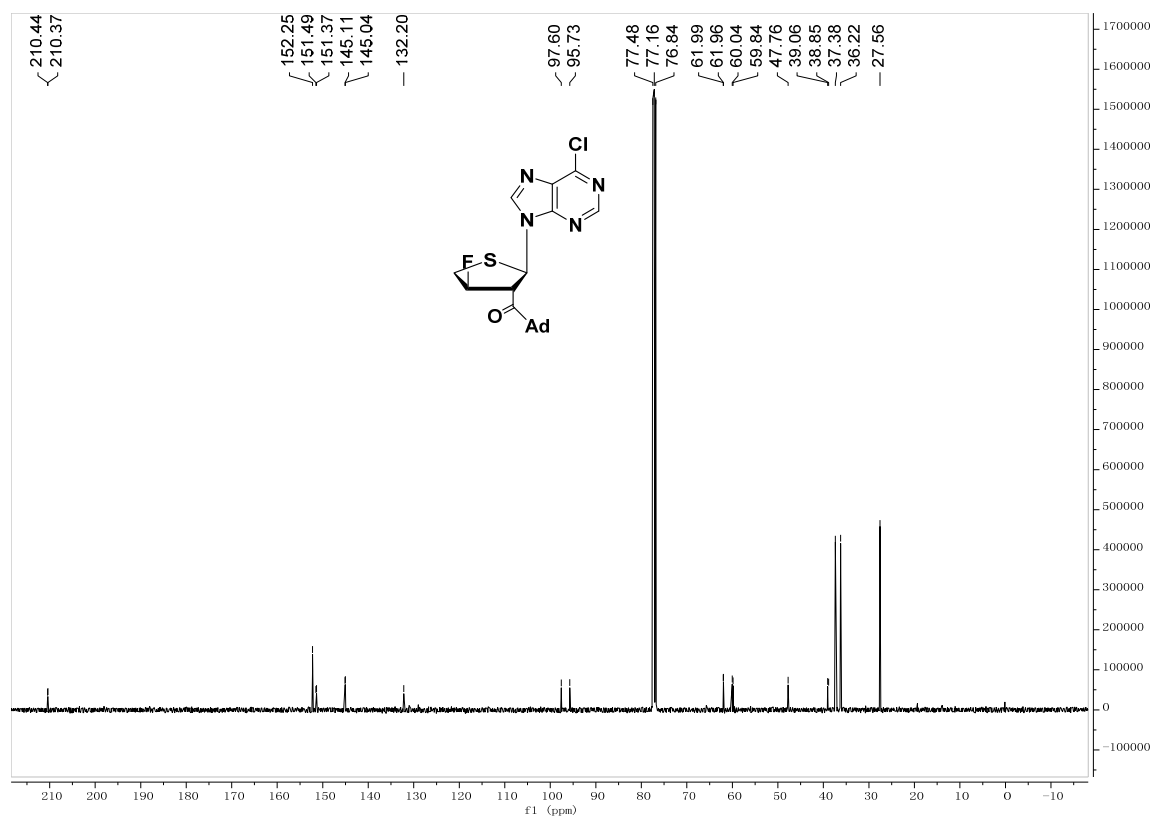

**<sup>19</sup>F NMR of 5a (376 MHz, CDCl<sub>3</sub>)**

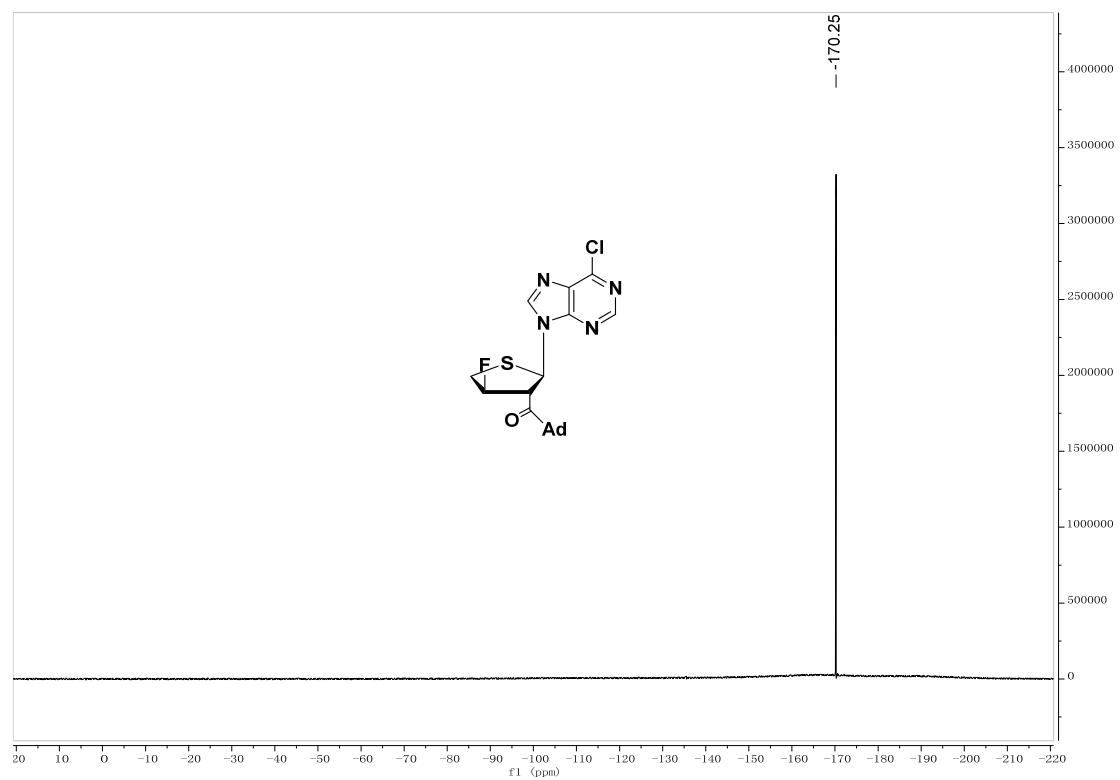

### <sup>1</sup>H NMR of 5b (600 MHz, CDCl<sub>3</sub>)

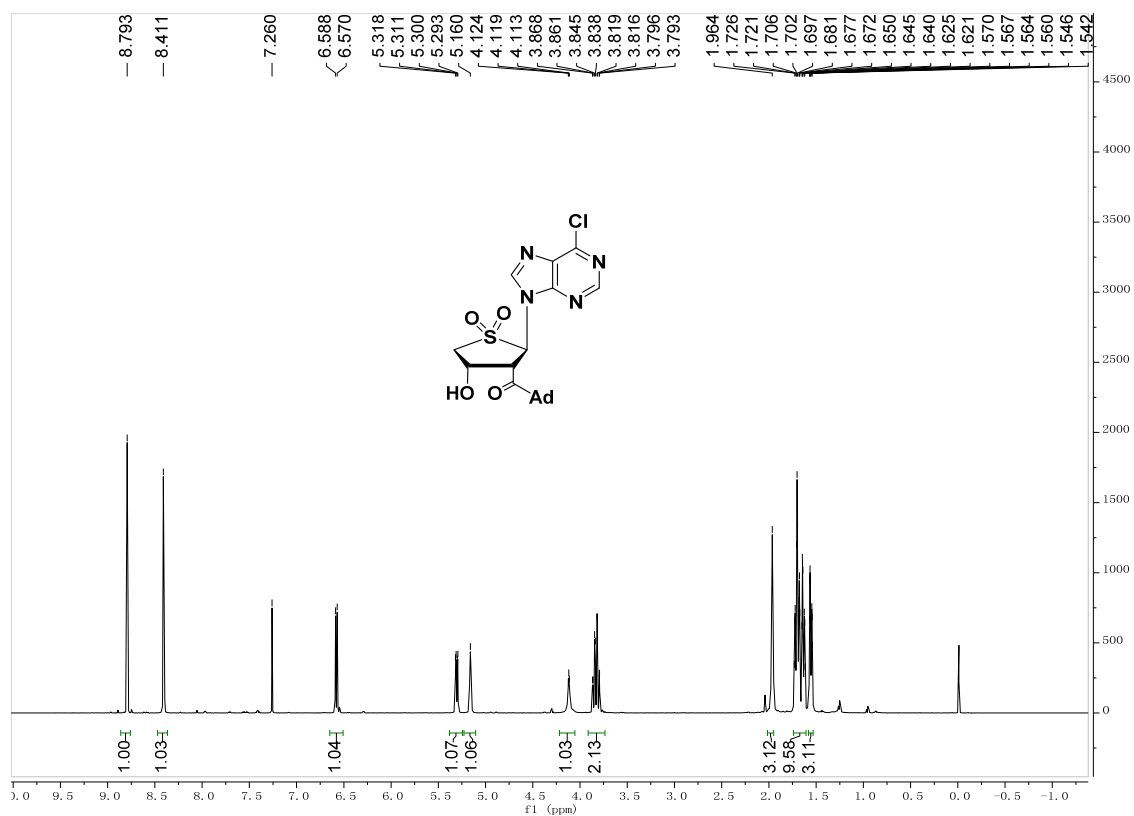

### <sup>13</sup>C NMR of 5b (150 MHz, CDCl<sub>3</sub>)

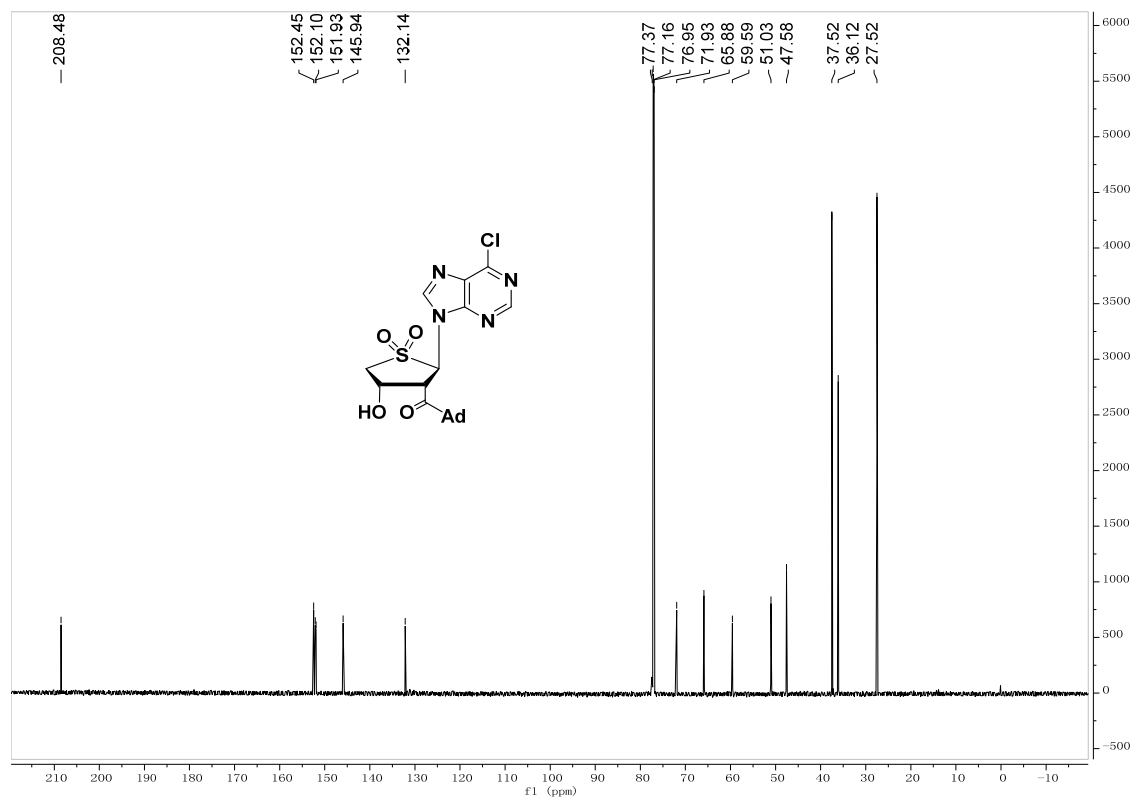

## 8. Reference

1. Q.-L. Yang, M.-S. Xie, C. Xia, H.-L. Sun, D.-J. Zhang, K.-X. Huang, Z. Guo, G.-R. Qu and H.-M. Guo, *Chem. Commun.*, 2014, **50**, 14809-14812.
2. (a) N. Baricordi, S. Benetti, V. Bertolasi, C. De Risi, G. P. Pollini, F. Zamberlan and V. Zanirato, *Tetrahedron*, 2012, **68**, 208-213. (b) K.-X. Huang, M.-S. Xie, J.-W. Sang, G.-R. Qu and H.-M. Guo, *Org. Lett.*, 2020, **23**, 81-86.
3. M. Waser, E. D. Moher, S. S. K. Borders, M. M. Hansen, D. W. Hoard, M. E. Laurila, M. E. LeTourneau, R. D. Miller, M. L. Phillips, K. A. Sullivan, J. A. Ward, C. Xie, C. A. Bye, T. Leitner, B. Herzog-Krimbacher, M. Kordian and M. Müllner, *Org. Process Res. Dev.*, 2011, **15**, 1266-1274.
